# Supplementary material for: Inflammatory signature in acute-on-chronic liver failure includes increased expression of granulocyte genes ELANE, MPO and CD177
Source: Sci Rep. 2021 Sep 22;11:18849. doi: 10.1038/s41598-021-98086-6 (PMC8458283; doi:10.1038/s41598-021-98086-6)
Supplement: Supplementary file 9 — Supplementary Information 9. [file 41598_2021_98086_MOESM9_ESM.xlsx]

## Sheet: DEG
EntrezID	logFC	AveExpr	t	P.Value	adj.P.Val	B	Symbols	Name
5577	-4.2526	6.8018	-5.6436	9.4386e-06	0.037639	3.4363	PRKAR2B	protein kinase cAMP-dependent type II regulatory subunit beta
4603	-4.1576	7.2229	-5.6413	9.4904e-06	0.037639	3.4315	MYBL1	MYB proto-oncogene like 1
8436	-4.3606	6.06	-5.5743	1.1178e-05	0.037639	3.2893	CAVIN2	caveolae associated protein 2
8876	3.6082	13.415	5.5681	1.1349e-05	0.037639	3.2761	VNN1	vanin 1
55301	6.0812	9.5266	5.5493	1.1883e-05	0.037639	3.2361	OLAH	oleoyl-ACP hydrolase
7915	-3.615	4.1429	-5.4447	1.5356e-05	0.037639	3.0128	ALDH5A1	aldehyde dehydrogenase 5 family member A1
23500	3.7418	9.6545	5.3981	1.7218e-05	0.037639	2.913	DAAM2	dishevelled associated activator of morphogenesis 2
10562	4.0405	9.1526	5.3663	1.8617e-05	0.037639	2.8448	OLFM4	olfactomedin 4
2887	3.4782	12.316	5.3469	1.9529e-05	0.037639	2.803	GRB10	growth factor receptor bound protein 10
387763	4.5485	9.6287	5.301	2.1868e-05	0.037933	2.7042	C11orf96	chromosome 11 open reading frame 96
3580	-4.0754	6.0199	-5.2569	2.4384e-05	0.038451	2.6089	CXCR2P1	C-X-C motif chemokine receptor 2 pseudogene 1
25893	-4.5784	8.485	-5.1811	2.9407e-05	0.042307	2.445	TRIM58	tripartite motif containing 58
55008	-3.368	4.9157	-5.1167	3.4496e-05	0.042307	2.3051	HERC6	HECT and RLD domain containing E3 ubiquitin protein ligase family member 6
87178	-3.0773	6.7516	-5.0828	3.7516e-05	0.042307	2.2315	PNPT1	polyribonucleotide nucleotidyltransferase 1
28231	3.5924	5.4767	5.0634	3.9364e-05	0.042307	2.1893	SLCO4A1	solute carrier organic anion transporter family member 4A1
60487	-2.8214	5.0405	-5.0553	4.0165e-05	0.042307	2.1716	TRMT11	tRNA methyltransferase 11 homolog
84281	-3.6165	5.1247	-5.0425	4.1463e-05	0.042307	2.1437	C2orf88	chromosome 2 open reading frame 88
6886	-3.1788	4.4556	-4.9981	4.6293e-05	0.044611	2.047	TAL1	"TAL bHLH transcription factor 1, erythroid differentiation factor"
81027	-4.2585	6.5989	-4.9744	4.911e-05	0.044835	1.9951	TUBB1	tubulin beta 1 class VI
1308	4.0159	5.0188	4.9258	5.5416e-05	0.048062	1.8889	COL17A1	collagen type XVII alpha 1 chain
23607	-3.7169	4.8302	-4.874	6.3034e-05	0.051976	1.7756	CD2AP	CD2 associated protein
56953	-3.2616	7.7385	-4.8561	6.5921e-05	0.051976	1.7363	NT5M	"5',3'-nucleotidase, mitochondrial"
5087	-3.1152	3.1812	-4.8153	7.2963e-05	0.055026	1.6469	PBX1	PBX homeobox 1
54855	-3.6078	10.612	-4.7916	7.7415e-05	0.055952	1.5948	TENT5C	terminal nucleotidyltransferase 5C
9945	-2.6912	2.7046	-4.7741	8.0874e-05	0.056114	1.5563	GFPT2	glutamine-fructose-6-phosphate transaminase 2
2114	2.5568	12.237	4.7061	9.5825e-05	0.059455	1.4068	ETS2	"ETS proto-oncogene 2, transcription factor"
7850	3.6694	14.776	4.6689	0.00010514	0.059455	1.325	IL1R2	interleukin 1 receptor type 2
9781	-3.4424	4.952	-4.6611	0.00010721	0.059455	1.3078	RNF144A	ring finger protein 144A
3249	3.1369	3.67	4.6607	0.00010731	0.059455	1.307	HPN	hepsin
414062	3.4072	11.768	4.6448	0.00011166	0.059455	1.2719	CCL3L3	C-C motif chemokine ligand 3 like 3
145567	-2.6159	7.6741	-4.626	0.00011704	0.059455	1.2304	TTC7B	tetratricopeptide repeat domain 7B
5617	3.5556	7.3771	4.619	0.00011911	0.059455	1.215	PRL	prolactin
800	-2.7758	4.1533	-4.6158	0.00012006	0.059455	1.208	CALD1	caldesmon 1
83700	-2.9554	2.5655	-4.595	0.00012646	0.059455	1.1622	JAM3	junctional adhesion molecule 3
5197	-3.9104	5.4952	-4.5832	0.00013025	0.059455	1.1361	PF4V1	platelet factor 4 variant 1
375790	-2.9974	7.5424	-4.5696	0.00013474	0.059455	1.1062	AGRN	agrin
2791	-3.5007	7.9685	-4.5584	0.00013858	0.059455	1.0814	GNG11	G protein subunit gamma 11
2781	-3.0263	7.113	-4.5537	0.00014022	0.059455	1.071	GNAZ	G protein subunit alpha z
11213	2.5721	12.892	4.5489	0.00014191	0.059455	1.0604	IRAK3	interleukin 1 receptor associated kinase 3
3975	3.0983	7.4757	4.5419	0.00014442	0.059455	1.0449	LHX1	LIM homeobox 1
1991	3.3036	7.5124	4.5389	0.00014551	0.059455	1.0383	ELANE	"elastase, neutrophil expressed"
10929	-3.6868	6.4865	-4.5368	0.00014627	0.059455	1.0337	SRSF8	serine and arginine rich splicing factor 8
8870	3.2899	14.513	4.5265	0.00015008	0.059455	1.011	IER3	immediate early response 3
57126	5.3977	11.953	4.5226	0.00015154	0.059455	1.0024	CD177	CD177 molecule
79746	2.4777	9.6975	4.509	0.00015677	0.059455	0.97252	ECHDC3	enoyl-CoA hydratase domain containing 3
10924	3.0272	10.923	4.4944	0.0001626	0.059455	0.94027	SMPDL3A	sphingomyelin phosphodiesterase acid like 3A
6604	2.6682	13.673	4.4941	0.00016273	0.059455	0.93955	SMARCD3	"SWI/SNF related, matrix associated, actin dependent regulator of chromatin, subfamily d, member 3"
122402	3.4226	10.826	4.4863	0.00016593	0.059455	0.92236	TDRD9	tudor domain containing 9
348093	-3.4622	3.4338	-4.4719	0.00017203	0.059455	0.89045	RBPMS2	"RNA binding protein, mRNA processing factor 2"
56172	-3.2728	3.5306	-4.4707	0.00017254	0.059455	0.88784	ANKH	ANKH inorganic pyrophosphate transport regulator
79913	-2.3159	5.5627	-4.4643	0.0001753	0.059455	0.8738	ACTR5	actin related protein 5
134864	2.3348	3.1187	4.4577	0.00017824	0.059455	0.85916	TAAR1	trace amine associated receptor 1
55363	-3.9605	5.4812	-4.4395	0.00018653	0.059481	0.81895	HEMGN	hemogen
7504	-4.0382	6.3184	-4.4357	0.00018831	0.059481	0.81056	XK	X-linked Kx blood group
10561	-4.1481	10.641	-4.4351	0.0001886	0.059481	0.80922	IFI44	interferon induced protein 44
217	2.6281	11.894	4.4258	0.00019302	0.059787	0.78877	ALDH2	aldehyde dehydrogenase 2 family member
2017	-2.6697	5.8464	-4.4107	0.00020045	0.061	0.75539	CTTN	cortactin
51480	2.7271	6.3127	4.401	0.00020538	0.061017	0.7339	VCX2	variable charge X-linked 2
91624	-2.2245	5.9041	-4.3968	0.00020754	0.061017	0.72466	NEXN	nexilin F-actin binding protein
2258	3.501	9.5094	4.3535	0.00023129	0.065348	0.62891	FGF13	fibroblast growth factor 13
256435	2.452	9.3071	4.3463	0.00023547	0.065348	0.61306	ST6GALNAC3	"ST6 N-acetylgalactosaminide alpha-2,6-sialyltransferase 3"
3434	-4.0507	12.023	-4.3462	0.00023555	0.065348	0.61277	IFIT1	interferon induced protein with tetratricopeptide repeats 1
7754	-3.2811	3.2942	-4.3375	0.00024067	0.065348	0.59376	ZNF204P	"zinc finger protein 204, pseudogene"
100130733	2.5933	9.1365	4.3347	0.00024238	0.065348	0.5875	LRRC70	leucine rich repeat containing 70
643418	2.6116	10.122	4.3304	0.00024501	0.065348	0.57796	LIPN	lipase family member N
9063	2.7722	10.691	4.3245	0.00024864	0.065348	0.56496	PIAS2	protein inhibitor of activated STAT 2
54739	-4.0981	9.8175	-4.3044	0.00026147	0.066872	0.52047	XAF1	XIAP associated factor 1
84333	-2.5105	9.5861	-4.3031	0.00026233	0.066872	0.51758	PCGF5	polycomb group ring finger 5
9254	-2.4429	5.1793	-4.293	0.00026901	0.066872	0.49534	CACNA2D2	calcium voltage-gated channel auxiliary subunit alpha2delta 2
92521	-2.449	8.6446	-4.2824	0.00027625	0.066872	0.47186	SPECC1	sperm antigen with calponin homology and coiled-coil domains 1
116444	2.4622	6.5948	4.2785	0.00027891	0.066872	0.46338	GRIN3B	glutamate ionotropic receptor NMDA type subunit 3B
91543	-5.3828	9.4699	-4.2771	0.00027988	0.066872	0.46034	RSAD2	radical S-adenosyl methionine domain containing 2
100288432	3.0013	9.9019	4.2749	0.00028143	0.066872	0.45545	IL10RB-DT	IL10RB divergent transcript
653319	-2.7187	6.9823	-4.2689	0.00028572	0.066974	0.44207	KIAA0895L	KIAA0895 like
129607	-3.8402	8.7213	-4.2532	0.00029712	0.067828	0.40748	CMPK2	cytidine/uridine monophosphate kinase 2
2205	-4.3427	6.1262	-4.2531	0.00029718	0.067828	0.40728	FCER1A	Fc fragment of IgE receptor Ia
221481	2.7069	5.3057	4.2436	0.00030433	0.068101	0.38626	ARMC12	armadillo repeat containing 12
9829	-3.0557	3.3358	-4.2411	0.00030623	0.068101	0.38076	DNAJC6	DnaJ heat shock protein family (Hsp40) member C6
54977	-3.0745	5.7767	-4.2346	0.00031123	0.068337	0.36643	SLC25A38	solute carrier family 25 member 38
136259	2.8771	4.9956	4.2253	0.00031859	0.068909	0.34576	KLF14	Kruppel like factor 14
51191	-3.9006	9.5834	-4.2213	0.00032178	0.068909	0.33695	HERC5	HECT and RLD domain containing E3 ubiquitin protein ligase 5
6622	-3.832	8.6937	-4.202	0.00033768	0.071432	0.29429	SNCA	synuclein alpha
27087	-3.3299	4.8574	-4.172	0.00036387	0.075315	0.22824	B3GAT1	"beta-1,3-glucuronyltransferase 1"
58484	2.63	13.036	4.1634	0.00037176	0.075315	0.20926	NLRC4	NLR family CARD domain containing 4
10257	-2.9248	3.0078	-4.1597	0.00037525	0.075315	0.20098	ABCC4	ATP binding cassette subfamily C member 4
199675	3.1321	15.045	4.1577	0.00037709	0.075315	0.19666	MCEMP1	mast cell expressed membrane protein 1
586	2.9132	8.5851	4.157	0.00037775	0.075315	0.19513	BCAT1	branched chain amino acid transaminase 1
8460	2.621	12.564	4.1492	0.00038524	0.075936	0.17775	TPST1	tyrosylprotein sulfotransferase 1
1647	2.5605	12.765	4.1337	0.00040036	0.077356	0.14369	GADD45A	growth arrest and DNA damage inducible alpha
4072	3.9195	5.9612	4.1319	0.00040221	0.077356	0.13961	EPCAM	epithelial cell adhesion molecule
100820829	-2.6045	3.3804	-4.1283	0.00040582	0.077356	0.13171	MYZAP	myocardial zonula adherens protein
64761	-2.7335	10.143	-4.1175	0.0004169	0.078587	0.10788	PARP12	poly(ADP-ribose) polymerase family member 12
157638	-3.2598	4.6164	-4.1087	0.00042618	0.078587	0.088413	LRATD2	LRAT domain containing 2
92689	1.7664	5.3718	4.1056	0.00042944	0.078587	0.081666	FAM114A1	family with sequence similarity 114 member A1
6614	-3.1389	3.0757	-4.1047	0.0004304	0.078587	0.079687	SIGLEC1	sialic acid binding Ig like lectin 1
10964	-4.2396	9.459	-4.0979	0.00043781	0.079107	0.064597	IFI44L	interferon induced protein 44 like
6348	3.2425	15.189	4.093	0.00044311	0.079239	0.053952	CCL3	C-C motif chemokine ligand 3
54874	-2.0097	5.2065	-4.0884	0.00044824	0.079338	0.043771	FNBP1L	formin binding protein 1 like
2729	-2.8924	6.9504	-4.0824	0.00045504	0.079728	0.030457	GCLC	glutamate-cysteine ligase catalytic subunit
10538	2.3386	13.016	4.0739	0.00046477	0.080618	0.01174	BATF	basic leucine zipper ATF-like transcription factor
969	-3.4939	8.9598	-4.0677	0.00047197	0.081057	-0.0018635	CD69	CD69 molecule
23531	-2.6202	7.6945	-4.0539	0.00048847	0.083069	-0.032264	MMD	monocyte to macrophage differentiation associated
10826	-2.745	8.1656	-4.0309	0.00051724	0.086922	-0.082884	FAXDC2	fatty acid hydroxylase domain containing 2
80763	-3.0593	3.183	-4.0269	0.00052253	0.086922	-0.091898	SPX	spexin hormone
144571	-2.9126	7.6409	-4.0241	0.00052616	0.086922	-0.098018	A2M-AS1	A2M antisense RNA 1
196527	-2.6601	7.602	-4.0201	0.00053134	0.086949	-0.10668	ANO6	anoctamin 6
79047	-2.7255	3.4735	-4.0148	0.00053843	0.087119	-0.11841	KCTD15	potassium channel tetramerization domain containing 15
79730	2.9869	11.191	4.0118	0.00054242	0.087119	-0.12494	NSUN7	NOP2/Sun RNA methyltransferase family member 7
6364	3.7673	8.437	4.0032	0.00055423	0.088199	-0.144	CCL20	C-C motif chemokine ligand 20
631	-2.9263	4.3913	-3.9742	0.00059571	0.093003	-0.20784	BFSP1	beaded filament structural protein 1
26577	5.0038	6.3231	3.9736	0.00059663	0.093003	-0.2092	PCOLCE2	procollagen C-endopeptidase enhancer 2
11183	-3.2469	6.8786	-3.9691	0.00060327	0.093003	-0.21899	MAP4K5	mitogen-activated protein kinase kinase kinase kinase 5
152926	-2.3427	6.2286	-3.9674	0.00060586	0.093003	-0.22279	PPM1K	"protein phosphatase, Mg2+/Mn2+ dependent 1K"
1588	3.7084	4.4648	3.9574	0.00062108	0.094141	-0.24473	CYP19A1	cytochrome P450 family 19 subfamily A member 1
8332	2.4843	8.8482	3.9543	0.00062587	0.094141	-0.25153	H2AC16	H2A clustered histone 16
83699	-2.5524	4.546	-3.9519	0.00062956	0.094141	-0.25672	SH3BGRL2	SH3 domain binding glutamate rich protein like 2
221002	2.2944	8.8787	3.9268	0.00067005	0.098661	-0.31186	RASGEF1A	RasGEF domain family member 1A
3732	2.5619	13.451	3.9229	0.00067666	0.098661	-0.32053	CD82	CD82 molecule
54453	-3.3164	5.9233	-3.9197	0.00068202	0.098661	-0.32751	RIN2	Ras and Rab interactor 2
64061	-2.7109	4.8165	-3.9194	0.00068254	0.098661	-0.32819	TSPYL2	TSPY like 2
7111	-3.486	3.2872	-3.911	0.00069695	0.099911	-0.34666	TMOD1	tropomodulin 1
387911	1.8943	4.8204	3.9035	0.00071007	0.10025	-0.36317	C1QTNF9B	C1q and TNF related 9B
100874255	-1.8232	3.1149	-3.903	0.00071086	0.10025	-0.36415	RNASEH2B-AS1	RNASEH2B antisense RNA 1
8131	-3.0863	7.5647	-3.8933	0.00072815	0.10186	-0.3854	NPRL3	"NPR3 like, GATOR1 complex subunit"
4900	-2.6069	9.0025	-3.8797	0.00075329	0.10453	-0.41542	NRGN	neurogranin
55512	-3.8337	8.9697	-3.8571	0.00079672	0.10915	-0.46498	SMPD3	sphingomyelin phosphodiesterase 3
2289	2.2925	11.736	3.8524	0.00080598	0.10915	-0.4752	FKBP5	FKBP prolyl isomerase 5
4353	2.4493	8.804	3.8507	0.0008093	0.10915	-0.47884	MPO	myeloperoxidase
5732	2.6006	11.218	3.8495	0.00081176	0.10915	-0.48152	PTGER2	prostaglandin E receptor 2
200931	3.7694	9.2021	3.8412	0.00082858	0.10947	-0.49965	SLC51A	solute carrier family 51 subunit alpha
2992	2.3778	13.691	3.8404	0.00083033	0.10947	-0.50152	GYG1	glycogenin 1
60468	-2.3067	4.5215	-3.839	0.00083307	0.10947	-0.50444	BACH2	BTB domain and CNC homolog 2
23564	2.2429	13.468	3.8303	0.00085142	0.11036	-0.52369	DDAH2	dimethylarginine dimethylaminohydrolase 2
3248	2.8813	8.2952	3.8289	0.00085433	0.11036	-0.52671	HPGD	15-hydroxyprostaglandin dehydrogenase
3690	-2.4991	6.5999	-3.8267	0.00085889	0.11036	-0.53142	ITGB3	integrin subunit beta 3
7076	2.7334	12.232	3.8169	0.00088003	0.11224	-0.55292	TIMP1	TIMP metallopeptidase inhibitor 1
51466	-2.508	10.555	-3.8127	0.00088915	0.11258	-0.56204	EVL	Enah/Vasp-like
79993	-2.7828	4.0611	-3.804	0.00090867	0.11262	-0.58123	ELOVL7	ELOVL fatty acid elongase 7
100128927	-2.02	5.7853	-3.8027	0.00091142	0.11262	-0.5839	ZBTB42	zinc finger and BTB domain containing 42
2039	-3.4998	9.0526	-3.7991	0.00091967	0.11262	-0.59187	DMTN	dematin actin binding protein
80830	-2.7526	9.8949	-3.7984	0.00092128	0.11262	-0.59341	APOL6	apolipoprotein L6
9508	3.6201	3.968	3.7943	0.0009307	0.11262	-0.60241	ADAMTS3	ADAM metallopeptidase with thrombospondin type 1 motif 3
5004	3.8187	13.892	3.7934	0.00093265	0.11262	-0.60426	ORM1	orosomucoid 1
6095	-4.0835	6.7828	-3.7917	0.0009366	0.11262	-0.60799	RORA	RAR related orphan receptor A
116159	3.6996	4.8757	3.7896	0.00094144	0.11262	-0.61255	CYYR1	cysteine and tyrosine rich 1
100130920	-2.9796	7.6088	-3.7855	0.0009512	0.11301	-0.62167	100130920	NA
154761	1.8371	6.0691	3.7782	0.00096837	0.11427	-0.63748	LOC154761	"family with sequence similarity 115, member C pseudogene"
22902	-2.3626	2.9951	-3.7714	0.0009849	0.11455	-0.65244	RUFY3	RUN and FYVE domain containing 3
10161	-2.3415	8.025	-3.7696	0.00098925	0.11455	-0.65633	LPAR6	lysophosphatidic acid receptor 6
444	2.36	10.988	3.7686	0.00099171	0.11455	-0.65853	ASPH	aspartate beta-hydroxylase
85320	2.2727	3.2879	3.7664	0.00099717	0.11455	-0.66339	ABCC11	ATP binding cassette subfamily C member 11
5613	-3.0841	6.7451	-3.7608	0.0010111	0.11538	-0.67564	PRKX	protein kinase X-linked
8835	-2.5893	6.6429	-3.749	0.0010408	0.11727	-0.70121	SOCS2	suppressor of cytokine signaling 2
54491	1.8206	9.4136	3.7489	0.0010411	0.11727	-0.7015	OTULINL	OTU deubiquitinase with linear linkage specificity like
1669	2.9429	11.067	3.744	0.0010539	0.11794	-0.7123	DEFA4	defensin alpha 4
10133	-2.8466	7.1814	-3.7286	0.0010947	0.12028	-0.74585	OPTN	optineurin
9917	-2.1537	8.4368	-3.7208	0.0011161	0.12028	-0.76292	FAM20B	FAM20B glycosaminoglycan xylosylkinase
5005	3.7575	12.937	3.7199	0.0011184	0.12028	-0.76477	ORM2	orosomucoid 2
222223	-2.3721	3.1096	-3.7198	0.0011188	0.12028	-0.76509	KIAA1324L	KIAA1324 like
383	3.7249	13.818	3.7171	0.0011261	0.12028	-0.77082	ARG1	arginase 1
395	-2.37	3.077	-3.7164	0.0011281	0.12028	-0.77242	ARHGAP6	Rho GTPase activating protein 6
10219	-3.1307	6.5484	-3.7159	0.0011294	0.12028	-0.77346	KLRG1	killer cell lectin like receptor G1
25780	-2.851	5.1798	-3.7156	0.0011303	0.12028	-0.77412	RASGRP3	RAS guanyl releasing protein 3
1318	1.9517	13.886	3.7074	0.0011535	0.1217	-0.79206	SLC31A2	solute carrier family 31 member 2
84935	1.7103	4.5228	3.7029	0.0011662	0.1217	-0.80175	MEDAG	mesenteric estrogen dependent adipogenesis
100996664	1.7229	3.63	3.7024	0.0011677	0.1217	-0.80289	LOC100996664	uncharacterized LOC100996664
55601	-2.9034	8.9604	-3.701	0.0011717	0.1217	-0.80588	DDX60	DExD/H-box helicase 60
53831	3.4464	10.27	3.691	0.0012011	0.12401	-0.8278	GPR84	G protein-coupled receptor 84
726	-2.158	4.7802	-3.6869	0.0012131	0.12451	-0.83659	CAPN5	calpain 5
4014	2.192	3.2661	3.6844	0.0012206	0.12455	-0.84203	LORICRIN	loricrin cornified envelope precursor protein
4145	-2.4025	5.9315	-3.682	0.001228	0.12457	-0.84736	MATK	megakaryocyte-associated tyrosine kinase
4052	-2.2533	3.568	-3.6751	0.0012489	0.12595	-0.86227	LTBP1	latent transforming growth factor beta binding protein 1
5149	2.4399	6.3656	3.6724	0.0012573	0.12606	-0.86817	PDE6H	phosphodiesterase 6H
4548	-2.7441	5.1619	-3.6692	0.0012672	0.12622	-0.87514	MTR	5-methyltetrahydrofolate-homocysteine methyltransferase
5027	-2.1134	6.1038	-3.6663	0.0012765	0.12622	-0.88155	P2RX7	purinergic receptor P2X 7
57085	2.1726	11.763	3.6649	0.0012807	0.12622	-0.88446	AGTRAP	angiotensin II receptor associated protein
1030	1.814	3.3299	3.6579	0.0013031	0.1277	-0.89979	CDKN2B	cyclin dependent kinase inhibitor 2B
239	-2.5717	4.9584	-3.6517	0.001323	0.12893	-0.9132	ALOX12	"arachidonate 12-lipoxygenase, 12S type"
3560	-3.3995	8.7854	-3.6366	0.0013731	0.13187	-0.94598	IL2RB	interleukin 2 receptor subunit beta
56663	1.9907	4.9513	3.6325	0.0013869	0.13187	-0.95481	VTRNA1-2	vault RNA 1-2
4306	-2.5909	3.6023	-3.6306	0.0013933	0.13187	-0.95888	NR3C2	nuclear receptor subfamily 3 group C member 2
85465	-2.8593	5.8832	-3.6294	0.0013976	0.13187	-0.96158	SELENOI	selenoprotein I
104	-1.9565	7.2974	-3.6282	0.0014016	0.13187	-0.96413	ADARB1	adenosine deaminase RNA specific B1
9021	2.0056	13.275	3.6279	0.0014026	0.13187	-0.96479	SOCS3	suppressor of cytokine signaling 3
100128420	-2.8725	4.6968	-3.6236	0.0014175	0.13187	-0.97407	LINC00892	long intergenic non-protein coding RNA 892
90362	2.2479	7.574	3.6227	0.0014207	0.13187	-0.97611	FAM110B	family with sequence similarity 110 member B
83464	1.879	12.349	3.6224	0.0014217	0.13187	-0.97669	APH1B	"aph-1 homolog B, gamma-secretase subunit"
728927	-2.2064	7.8645	-3.6202	0.0014293	0.13188	-0.98142	ZNF736	zinc finger protein 736
994	-2.5226	8.4864	-3.6149	0.0014483	0.13293	-0.99309	CDC25B	cell division cycle 25B
729582	-2.286	2.4686	-3.6	0.0015021	0.13604	-1.0253	DIRC3	disrupted in renal carcinoma 3
56935	2.2758	12.543	3.5991	0.0015053	0.13604	-1.0271	SMCO4	single-pass membrane protein with coiled-coil domains 4
54497	-2.0543	7.7124	-3.599	0.0015058	0.13604	-1.0274	HEATR5B	HEAT repeat containing 5B
11341	2.8863	6.4263	3.5849	0.0015588	0.1401	-1.058	SCRG1	stimulator of chondrogenesis 1
6484	1.9795	9.4755	3.5805	0.0015758	0.1409	-1.0675	ST3GAL4	"ST3 beta-galactoside alpha-2,3-sialyltransferase 4"
100874264	2.1659	6.4981	3.5778	0.0015863	0.14101	-1.0734	AOAH-IT1	AOAH intronic transcript 1
255738	4.4481	5.6468	3.576	0.0015933	0.14101	-1.0773	PCSK9	proprotein convertase subtilisin/kexin type 9
10392	-2.0133	6.7379	-3.5719	0.0016093	0.1412	-1.0861	NOD1	nucleotide binding oligomerization domain containing 1
24138	-2.6824	10.575	-3.5705	0.0016149	0.1412	-1.0892	IFIT5	interferon induced protein with tetratricopeptide repeats 5
5797	-2.6833	3.4822	-3.5692	0.00162	0.1412	-1.0919	PTPRM	protein tyrosine phosphatase receptor type M
23365	-2.066	4.2325	-3.5631	0.0016446	0.14263	-1.1052	ARHGEF12	Rho guanine nucleotide exchange factor 12
347746	-2.1021	6.331	-3.5602	0.001656	0.14291	-1.1113	PWARSN	"Prader Willi/Angelman region RNA, SNRPN neighbor"
100507670	2.2619	8.0272	3.5574	0.0016676	0.1432	-1.1175	ZNF687-AS1	ZNF687 antisense RNA 1
283174	-2.4393	3.7589	-3.5485	0.0017043	0.14563	-1.1367	MIR4697HG	MIR4697 host gene
566	2.3185	7.9074	3.5465	0.0017127	0.14563	-1.141	AZU1	azurocidin 1
283588	-1.7829	7.8312	-3.5432	0.0017265	0.14608	-1.1481	283588	NA
4118	-2.7465	8.841	-3.5398	0.0017408	0.14635	-1.1554	MAL	"mal, T cell differentiation protein"
7293	-2.1736	6.9455	-3.5385	0.0017465	0.14635	-1.1583	TNFRSF4	TNF receptor superfamily member 4
725	1.8587	3.8436	3.5333	0.001769	0.14688	-1.1696	C4BPB	complement component 4 binding protein beta
116844	2.6645	14.399	3.533	0.0017701	0.14688	-1.1701	LRG1	leucine rich alpha-2-glycoprotein 1
27010	1.8394	10.796	3.5311	0.0017783	0.14688	-1.1742	TPK1	thiamin pyrophosphokinase 1
389257	2.1537	2.7548	3.5244	0.0018078	0.14862	-1.1887	LRRC14B	leucine rich repeat containing 14B
64919	-2.5833	7.0745	-3.5219	0.0018188	0.14882	-1.194	BCL11B	BAF chromatin remodeling complex subunit BCL11B
3267	1.9693	10.911	3.5126	0.0018607	0.15153	-1.2141	AGFG1	ArfGAP with FG repeats 1
7294	-2.2789	5.9171	-3.5076	0.0018836	0.15156	-1.2249	TXK	TXK tyrosine kinase
84436	-2.3407	3.0044	-3.505	0.0018955	0.15156	-1.2304	ZNF528	zinc finger protein 528
149628	-3.6773	4.612	-3.5044	0.0018984	0.15156	-1.2318	PYHIN1	pyrin and HIN domain family member 1
128346	2.0753	13.386	3.501	0.001914	0.15156	-1.239	C1orf162	chromosome 1 open reading frame 162
23165	-2.4035	8.608	-3.5007	0.0019157	0.15156	-1.2398	NUP205	nucleoporin 205
326342	-2.5911	4.9888	-3.4992	0.0019227	0.15156	-1.243	ADGRE4P	"adhesion G protein-coupled receptor E4, pseudogene"
10864	2.0277	9.3841	3.4987	0.0019247	0.15156	-1.2439	SLC22A7	solute carrier family 22 member 7
3939	1.9105	12.967	3.496	0.0019376	0.15156	-1.2498	LDHA	lactate dehydrogenase A
1031	2.404	9.419	3.4949	0.0019429	0.15156	-1.2522	CDKN2C	cyclin dependent kinase inhibitor 2C
27030	-2.5163	5.4929	-3.4937	0.0019484	0.15156	-1.2547	MLH3	mutL homolog 3
7577	-1.8618	8.3147	-3.4918	0.0019575	0.15159	-1.2588	ZNF29P	"zinc finger protein 29, pseudogene"
171558	-2.7697	7.2712	-3.4859	0.001986	0.15311	-1.2716	PTCRA	pre T cell antigen receptor alpha
203197	-2.1544	7.2023	-3.4829	0.0020003	0.15315	-1.2779	TMEM268	transmembrane protein 268
11278	-2.7741	6.9024	-3.478	0.0020246	0.15315	-1.2885	KLF12	Kruppel like factor 12
11274	-3.0771	7.2818	-3.4771	0.0020292	0.15315	-1.2906	USP18	ubiquitin specific peptidase 18
27018	-2.5118	7.9341	-3.4769	0.0020302	0.15315	-1.291	BEX3	brain expressed X-linked 3
399972	2.6092	10.08	3.4761	0.002034	0.15315	-1.2926	GSEC	G-quadruplex forming sequence containing lncRNA
10316	-2.0276	6.5518	-3.475	0.0020396	0.15315	-1.295	NMUR1	neuromedin U receptor 1
66008	-2.2822	7.7878	-3.4717	0.0020561	0.15373	-1.3021	TRAK2	trafficking kinesin protein 2
2131	2.0242	8.2517	3.4674	0.0020775	0.15417	-1.3113	EXT1	exostosin glycosyltransferase 1
55615	-2.296	8.3996	-3.467	0.0020798	0.15417	-1.3122	PRR5	proline rich 5
55647	2.209	9.0681	3.462	0.0021052	0.15539	-1.3229	RAB20	"RAB20, member RAS oncogene family"
6590	3.3677	12.557	3.4561	0.0021355	0.15696	-1.3355	SLPI	secretory leukocyte peptidase inhibitor
54602	-2.8086	3.9368	-3.4535	0.0021492	0.1573	-1.3412	NDFIP2	Nedd4 family interacting protein 2
399665	-3.4943	9.0045	-3.4484	0.0021758	0.15836	-1.352	FAM102A	family with sequence similarity 102 member A
2023	1.9584	11.921	3.4462	0.0021876	0.15836	-1.3568	ENO1	enolase 1
4070	2.2429	7.8052	3.4455	0.0021911	0.15836	-1.3582	TACSTD2	tumor associated calcium signal transducer 2
26228	-2.5011	3.7468	-3.4406	0.0022175	0.15961	-1.3687	STAP1	signal transducing adaptor family member 1
7571	-2.5081	5.2847	-3.437	0.002237	0.16035	-1.3765	ZNF23	zinc finger protein 23
94234	2.6144	6.3659	3.4324	0.0022625	0.16115	-1.3864	FOXQ1	forkhead box Q1
5996	-3.233	8.7261	-3.4316	0.0022669	0.16115	-1.3881	RGS1	regulator of G protein signaling 1
100507486	-2.0478	3.6291	-3.4235	0.002312	0.16369	-1.4055	100507486	NA
55972	1.7192	8.9355	3.4214	0.0023235	0.16383	-1.4098	SLC25A40	solute carrier family 25 member 40
64854	-2.4634	2.8831	-3.4173	0.0023466	0.16454	-1.4186	USP46	ubiquitin specific peptidase 46
414328	2.0527	11.252	3.4163	0.0023524	0.16454	-1.4207	IDNK	IDNK gluconokinase
51676	-2.4428	7.3309	-3.4141	0.0023654	0.16478	-1.4256	ASB2	ankyrin repeat and SOCS box containing 2
401124	-2.3793	2.7082	-3.4077	0.0024025	0.16669	-1.4393	DTHD1	death domain containing 1
441432	2.9424	4.6115	3.4037	0.002426	0.16765	-1.4478	AQP7P3	aquaporin 7 pseudogene 3
100127910	1.9641	3.2041	3.4011	0.0024409	0.16801	-1.4532	100127910	NA
6741	-2.1918	9.5088	-3.3974	0.002463	0.16848	-1.4612	SSB	small RNA binding exonuclease protection factor La
10098	-3.0781	6.0353	-3.3956	0.0024736	0.16848	-1.465	TSPAN5	tetraspanin 5
10644	-2.143	5.348	-3.3906	0.0025039	0.16848	-1.4757	IGF2BP2	insulin like growth factor 2 mRNA binding protein 2
5588	-2.8749	4.6808	-3.3904	0.0025055	0.16848	-1.4762	PRKCQ	protein kinase C theta
3990	-2.2867	2.9389	-3.3901	0.0025071	0.16848	-1.4768	LIPC	"lipase C, hepatic type"
10810	-2.6221	2.7706	-3.3887	0.0025158	0.16848	-1.4798	WASF3	WASP family member 3
56061	-2.0345	6.4809	-3.3879	0.0025207	0.16848	-1.4816	UBFD1	ubiquitin family domain containing 1
338872	2.055	2.962	3.3871	0.0025253	0.16848	-1.4832	C1QTNF9	C1q and TNF related 9
283089	-2.19	2.517	-3.382	0.0025571	0.16915	-1.4942	WDR11-AS1	WDR11 antisense RNA 1
57507	3.1154	7.5201	3.3766	0.0025902	0.16915	-1.5055	ZNF608	zinc finger protein 608
2281	-2.1609	6.7059	-3.3759	0.0025948	0.16915	-1.507	FKBP1B	FKBP prolyl isomerase 1B
25907	-2.6714	7.0469	-3.3741	0.002606	0.16915	-1.5108	TMEM158	transmembrane protein 158 (gene/pseudogene)
9289	-3.7217	8.9143	-3.3714	0.0026232	0.16915	-1.5166	ADGRG1	adhesion G protein-coupled receptor G1
10381	1.8504	4.5971	3.3712	0.0026247	0.16915	-1.5171	TUBB3	tubulin beta 3 class III
56884	2.5376	3.9138	3.3707	0.0026277	0.16915	-1.5181	FSTL5	follistatin like 5
100505774	1.7634	6.7538	3.3677	0.0026472	0.16915	-1.5247	LOC100505774	uncharacterized LOC100505774
22920	-2.0555	8.0646	-3.3666	0.002654	0.16915	-1.5269	KIFAP3	kinesin associated protein 3
3315	-2.8373	7.9189	-3.3662	0.0026565	0.16915	-1.5277	HSPB1	heat shock protein family B (small) member 1
729187	2.3201	4.2218	3.3659	0.0026587	0.16915	-1.5285	729187	NA
1668	2.1782	16.018	3.3655	0.0026613	0.16915	-1.5293	DEFA3	defensin alpha 3
7675	-2.4493	3.4733	-3.364	0.0026706	0.16915	-1.5324	ZNF121	zinc finger protein 121
8778	2.0318	11.265	3.3637	0.0026727	0.16915	-1.5331	SIGLEC5	sialic acid binding Ig like lectin 5
9830	-1.7339	7.4488	-3.361	0.0026905	0.16915	-1.5389	TRIM14	tripartite motif containing 14
9365	2.5111	6.2984	3.3599	0.0026972	0.16915	-1.5411	KL	klotho
84418	2.6157	15.742	3.3593	0.0027011	0.16915	-1.5424	CYSTM1	cysteine rich transmembrane module containing 1
284697	1.6292	4.9407	3.3479	0.002777	0.17165	-1.5667	BTBD8	BTB domain containing 8
23708	-2.3359	5.0205	-3.3475	0.0027794	0.17165	-1.5675	GSPT2	G1 to S phase transition 2
3702	-3.6583	5.9566	-3.3473	0.0027807	0.17165	-1.5679	ITK	IL2 inducible T cell kinase
7288	2.385	5.5907	3.3467	0.0027851	0.17165	-1.5693	TULP2	TUB like protein 2
8174	2.0161	7.7594	3.3454	0.0027936	0.17165	-1.572	MADCAM1	mucosal vascular addressin cell adhesion molecule 1
28959	-1.8358	7.9079	-3.342	0.002817	0.17165	-1.5793	TMEM176B	transmembrane protein 176B
10981	1.7064	11.81	3.3419	0.0028172	0.17165	-1.5794	RAB32	"RAB32, member RAS oncogene family"
760	-1.9083	9.075	-3.3414	0.0028206	0.17165	-1.5804	CA2	carbonic anhydrase 2
5010	2.3774	4.0378	3.34	0.0028301	0.17165	-1.5834	CLDN11	claudin 11
80127	-2.1218	4.7752	-3.3376	0.0028472	0.17179	-1.5887	BBOF1	basal body orientation factor 1
1511	2.4203	9.7514	3.3366	0.0028536	0.17179	-1.5907	CTSG	cathepsin G
266812	-1.951	5.21	-3.3346	0.0028677	0.17179	-1.595	NAP1L5	nucleosome assembly protein 1 like 5
59285	-2.846	6.7246	-3.3326	0.0028818	0.17179	-1.5993	CACNG6	calcium voltage-gated channel auxiliary subunit gamma 6
5393	-1.987	9.2007	-3.3308	0.0028941	0.17179	-1.6031	EXOSC9	exosome component 9
57605	-2.3584	3.2291	-3.3306	0.0028958	0.17179	-1.6036	PITPNM2	phosphatidylinositol transfer protein membrane associated 2
4057	2.2564	10.382	3.3297	0.0029018	0.17179	-1.6054	LTF	lactotransferrin
8302	-2.311	7.5797	-3.3267	0.0029227	0.17211	-1.6117	KLRC4	killer cell lectin like receptor C4
967	1.8859	15.962	3.3244	0.0029389	0.17211	-1.6166	CD63	CD63 molecule
11326	2.7049	8.5192	3.3239	0.0029428	0.17211	-1.6177	VSIG4	V-set and immunoglobulin domain containing 4
55718	-2.0842	7.1021	-3.3221	0.0029556	0.17211	-1.6216	POLR3E	RNA polymerase III subunit E
100131176	-2.8268	3.8517	-3.3208	0.0029647	0.17211	-1.6243	WDR86-AS1	WDR86 antisense RNA 1
643008	-2.1778	8.2051	-3.3205	0.0029668	0.17211	-1.6249	SMIM5	small integral membrane protein 5
401399	1.7772	6.0423	3.3167	0.0029945	0.17309	-1.633	PRRT4	proline rich transmembrane protein 4
5775	-2.6232	6.7558	-3.3154	0.0030036	0.17309	-1.6357	PTPN4	protein tyrosine phosphatase non-receptor type 4
64168	2.796	3.2995	3.3061	0.0030718	0.17576	-1.6555	NECAB1	N-terminal EF-hand calcium binding protein 1
2768	-2.0556	6.8132	-3.3055	0.003076	0.17576	-1.6566	GNA12	G protein subunit alpha 12
51479	-1.6715	8.8029	-3.3038	0.0030889	0.17576	-1.6603	ANKFY1	ankyrin repeat and FYVE domain containing 1
93349	-2.6978	7.982	-3.3036	0.0030904	0.17576	-1.6608	SP140L	SP140 nuclear body protein like
221476	-1.9165	5.4772	-3.3013	0.0031076	0.17616	-1.6656	PI16	peptidase inhibitor 16
26052	-2.3497	4.928	-3.2935	0.0031667	0.17719	-1.6822	DNM3	dynamin 3
128872	1.9652	7.3774	3.2916	0.0031812	0.17719	-1.6862	HMGB3P1	high mobility group box 3 pseudogene 1
7741	-1.8931	6.2576	-3.2914	0.0031825	0.17719	-1.6866	ZSCAN26	zinc finger and SCAN domain containing 26
64388	-2.4853	3.037	-3.2905	0.0031892	0.17719	-1.6884	GREM2	"gremlin 2, DAN family BMP antagonist"
2907	2.2593	12.24	3.2904	0.0031904	0.17719	-1.6887	GRINA	glutamate ionotropic receptor NMDA type subunit associated protein 1
9256	-1.7013	8.6817	-3.29	0.0031931	0.17719	-1.6895	TSPOAP1	TSPO associated protein 1
219333	-2.0555	4.7554	-3.2895	0.0031973	0.17719	-1.6906	USP12	ubiquitin specific peptidase 12
114879	-1.9655	7.1565	-3.2861	0.0032234	0.17807	-1.6978	OSBPL5	oxysterol binding protein like 5
114819	-2.0824	3.9377	-3.2819	0.003256	0.17896	-1.7066	CROCCP3	CROCC pseudogene 3
284649	1.656	5.2307	3.2814	0.0032603	0.17896	-1.7078	SMG7-AS1	SMG7 antisense RNA 1
10158	-2.7339	5.8003	-3.2796	0.0032742	0.17916	-1.7115	PDZK1IP1	PDZK1 interacting protein 1
51056	-2.2842	10.622	-3.2774	0.0032916	0.17955	-1.7162	LAP3	leucine aminopeptidase 3
375248	-2.1254	7.0571	-3.2586	0.0034438	0.18726	-1.7558	ANKRD36	ankyrin repeat domain 36
100130916	-2.0565	6.2082	-3.2556	0.0034689	0.18803	-1.7622	100130916	NA
388228	-3.3609	5.6608	-3.2524	0.0034957	0.18868	-1.769	SBK1	SH3 domain binding kinase 1
3800	-2.9547	4.0136	-3.2514	0.0035046	0.18868	-1.7712	KIF5C	kinesin family member 5C
8631	-2.9251	8.253	-3.2496	0.0035197	0.18868	-1.775	SKAP1	src kinase associated phosphoprotein 1
2766	-2.9548	5.5041	-3.2489	0.0035254	0.18868	-1.7764	GMPR	guanosine monophosphate reductase
5468	2.3518	4.2372	3.2462	0.003548	0.18868	-1.782	PPARG	peroxisome proliferator activated receptor gamma
54477	-2.0647	3.1064	-3.2455	0.0035544	0.18868	-1.7836	PLEKHA5	pleckstrin homology domain containing A5
50964	1.8937	5.2429	3.2452	0.0035569	0.18868	-1.7842	SOST	sclerostin
100129399	-3.0501	4.2212	-3.2421	0.0035837	0.18937	-1.7908	100129399	NA
7280	-1.7123	8.0626	-3.2411	0.0035918	0.18937	-1.7928	TUBB2A	tubulin beta 2A class IIa
55755	2.2059	12.04	3.2338	0.0036551	0.19213	-1.8081	CDK5RAP2	CDK5 regulatory subunit associated protein 2
5742	-1.6324	7.4421	-3.2293	0.0036947	0.19362	-1.8176	PTGS1	prostaglandin-endoperoxide synthase 1
959	-2.4004	6.5989	-3.2253	0.0037308	0.19434	-1.8261	CD40LG	CD40 ligand
6563	-2.7233	4.7748	-3.2253	0.0037309	0.19434	-1.8261	SLC14A1	solute carrier family 14 member 1 (Kidd blood group)
7562	-1.9776	2.6318	-3.2219	0.0037608	0.19508	-1.8331	ZNF708	zinc finger protein 708
55466	-1.9334	8.311	-3.2212	0.0037675	0.19508	-1.8347	DNAJA4	DnaJ heat shock protein family (Hsp40) member A4
23408	1.8854	8.8842	3.2151	0.0038227	0.19546	-1.8475	SIRT5	sirtuin 5
7049	-2.4001	4.3973	-3.215	0.003824	0.19546	-1.8477	TGFBR3	transforming growth factor beta receptor 3
23731	-1.8147	6.6593	-3.2143	0.00383	0.19546	-1.8491	TMEM245	transmembrane protein 245
11098	-2.3699	4.7194	-3.2126	0.0038463	0.19546	-1.8529	PRSS23	serine protease 23
326625	-1.9066	3.4607	-3.212	0.0038511	0.19546	-1.8539	MMAB	metabolism of cobalamin associated B
3212	-2.882	5.0806	-3.2119	0.0038524	0.19546	-1.8542	HOXB2	homeobox B2
2935	-2.4847	6.8401	-3.2116	0.0038556	0.19546	-1.855	GSPT1	G1 to S phase transition 1
1947	-1.7437	7.4573	-3.2105	0.0038651	0.19546	-1.8571	EFNB1	ephrin B1
117155	-1.7868	5.5337	-3.2085	0.0038836	0.19548	-1.8613	CATSPER2	cation channel sperm associated 2
2321	2.8207	4.8542	3.2081	0.0038879	0.19548	-1.8623	FLT1	fms related receptor tyrosine kinase 1
6094	1.9722	9.0451	3.204	0.0039257	0.19681	-1.8708	ROM1	retinal outer segment membrane protein 1
5029	-1.8951	7.8805	-3.1978	0.0039842	0.19798	-1.8837	P2RY2	purinergic receptor P2Y2
5990	1.85	10.253	3.1977	0.0039855	0.19798	-1.884	RFX2	regulatory factor X2
874	-2.0551	3.3268	-3.1973	0.0039899	0.19798	-1.885	CBR3	carbonyl reductase 3
55120	-1.7187	6.8192	-3.1965	0.0039975	0.19798	-1.8867	FANCL	FA complementation group L
387837	1.5548	8.8756	3.1956	0.0040062	0.19798	-1.8886	CLEC12B	C-type lectin domain family 12 member B
100130581	1.6342	4.6542	3.1923	0.0040375	0.1986	-1.8954	LINC00910	long intergenic non-protein coding RNA 910
5208	1.7512	11.901	3.1915	0.0040448	0.1986	-1.897	PFKFB2	"6-phosphofructo-2-kinase/fructose-2,6-biphosphatase 2"
10125	-2.2891	8.5189	-3.1906	0.0040541	0.1986	-1.899	RASGRP1	RAS guanyl releasing protein 1
321	-2.0021	5.2448	-3.1895	0.0040644	0.1986	-1.9012	APBA2	amyloid beta precursor protein binding family A member 2
4940	-2.6737	7.6871	-3.1869	0.0040901	0.19929	-1.9067	OAS3	2'-5'-oligoadenylate synthetase 3
29841	-1.9223	5.8239	-3.1834	0.0041239	0.20024	-1.914	GRHL1	grainyhead like transcription factor 1
246734	-2.0558	2.3681	-3.1825	0.0041327	0.20024	-1.9158	246734	NA
375061	3.1781	9.5431	3.1805	0.0041524	0.20064	-1.92	FAM89A	family with sequence similarity 89 member A
55701	2.1191	14.501	3.1789	0.0041684	0.20085	-1.9234	ARHGEF40	Rho guanine nucleotide exchange factor 40
8671	-2.3461	2.4392	-3.1772	0.0041859	0.20096	-1.927	SLC4A4	solute carrier family 4 member 4
80310	-2.322	2.6039	-3.1764	0.004194	0.20096	-1.9287	PDGFD	platelet derived growth factor D
642569	1.5884	4.5738	3.1744	0.0042134	0.20134	-1.9328	TRIM53AP	"tripartite motif containing 53A, pseudogene"
57801	-2.6701	10.961	-3.1723	0.0042349	0.20136	-1.9372	HES4	hes family bHLH transcription factor 4
169834	-1.746	2.1943	-3.1721	0.004237	0.20136	-1.9377	ZNF883	zinc finger protein 883
9123	2.0432	15.893	3.1666	0.0042925	0.20294	-1.9491	SLC16A3	solute carrier family 16 member 3
10742	1.5847	6.4829	3.1663	0.0042959	0.20294	-1.9498	RAI2	retinoic acid induced 2
221687	-2.8421	5.7083	-3.1622	0.0043379	0.20294	-1.9583	RNF182	ring finger protein 182
3983	-1.7087	8.6328	-3.1622	0.0043381	0.20294	-1.9583	ABLIM1	actin binding LIM protein 1
100873989	1.7344	3.4627	3.1615	0.0043456	0.20294	-1.9598	GRM5-AS1	GRM5 antisense RNA 1
100506219	1.8562	2.5329	3.1603	0.0043586	0.20294	-1.9624	100506219	NA
54625	-2.4501	10.79	-3.1602	0.0043591	0.20294	-1.9626	PARP14	poly(ADP-ribose) polymerase family member 14
122416	-2.4377	8.0031	-3.1597	0.0043639	0.20294	-1.9635	ANKRD9	ankyrin repeat domain 9
7100	1.7934	11.031	3.1563	0.0044003	0.20409	-1.9708	TLR5	toll like receptor 5
919	-3.0154	7.5911	-3.1548	0.0044158	0.20426	-1.9739	CD247	CD247 molecule
118430	2.4728	6.2848	3.15	0.0044666	0.20552	-1.9839	MUCL1	mucin like 1
57493	-2.5178	7.0984	-3.15	0.0044669	0.20552	-1.9839	HEG1	heart development protein with EGF like domains 1
27350	-2.2398	7.6544	-3.1442	0.0045283	0.20763	-1.9959	APOBEC3C	apolipoprotein B mRNA editing enzyme catalytic subunit 3C
137872	-1.8326	6.1177	-3.1434	0.0045366	0.20763	-1.9975	ADHFE1	alcohol dehydrogenase iron containing 1
53637	-2.9769	5.0037	-3.1418	0.0045544	0.20772	-2.0009	S1PR5	sphingosine-1-phosphate receptor 5
27074	-3.2661	7.0467	-3.1404	0.0045692	0.20772	-2.0038	LAMP3	lysosomal associated membrane protein 3
4939	-2.7403	8.863	-3.14	0.0045745	0.20772	-2.0048	OAS2	2'-5'-oligoadenylate synthetase 2
2986	2.1027	2.7677	3.1377	0.0045991	0.20788	-2.0095	GUCY2F	"guanylate cyclase 2F, retinal"
6375	-3.4741	4.9286	-3.1373	0.0046035	0.20788	-2.0103	XCL1	X-C motif chemokine ligand 1
51629	-3.059	8.6779	-3.1364	0.0046139	0.20788	-2.0123	SLC25A39	solute carrier family 25 member 39
7188	-2.0833	6.7568	-3.1325	0.0046561	0.20924	-2.0203	TRAF5	TNF receptor associated factor 5
54677	-2.0749	4.9168	-3.1294	0.0046914	0.20991	-2.0269	CROT	carnitine O-octanoyltransferase
2030	-2.6561	7.6978	-3.129	0.0046954	0.20991	-2.0276	SLC29A1	solute carrier family 29 member 1 (Augustine blood group)
56477	-2.1378	3.3625	-3.1262	0.0047266	0.21077	-2.0334	CCL28	C-C motif chemokine ligand 28
747	-2.219	2.7203	-3.1243	0.0047481	0.21079	-2.0374	DAGLA	diacylglycerol lipase alpha
100129662	1.7973	5.2158	3.124	0.0047515	0.21079	-2.038	FGF13-AS1	FGF13 antisense RNA 1
55365	-1.4638	6.8112	-3.1224	0.0047696	0.21104	-2.0413	TMEM176A	transmembrane protein 176A
154075	-2.9734	5.653	-3.1208	0.004788	0.21104	-2.0447	SAMD3	sterile alpha motif domain containing 3
333932	2.0292	8.07	3.1203	0.0047936	0.21104	-2.0457	H3C15	H3 clustered histone 15
2296	1.5931	7.0297	3.1172	0.0048291	0.21206	-2.0522	FOXC1	forkhead box C1
659	-2.293	4.7684	-3.116	0.0048426	0.21212	-2.0546	BMPR2	bone morphogenetic protein receptor type 2
7020	-2.6737	5.3157	-3.1044	0.0049775	0.2168	-2.0787	TFAP2A	transcription factor AP-2 alpha
2162	-2.1138	8.0673	-3.1034	0.0049897	0.2168	-2.0808	F13A1	coagulation factor XIII A chain
55022	-2.2608	5.8778	-3.1013	0.0050154	0.2168	-2.0853	PID1	phosphotyrosine interaction domain containing 1
30009	-2.7509	7.4492	-3.0994	0.0050371	0.2168	-2.0891	TBX21	T-box transcription factor 21
439921	1.7979	9.5196	3.0988	0.0050448	0.2168	-2.0904	MXRA7	matrix remodeling associated 7
55859	2.0354	7.076	3.0983	0.0050508	0.2168	-2.0915	BEX1	brain expressed X-linked 1
5657	1.69	6.9359	3.0979	0.005055	0.2168	-2.0922	PRTN3	proteinase 3
4343	-2.5818	7.0943	-3.0968	0.005068	0.2168	-2.0944	MOV10	Mov10 RISC complex RNA helicase
11251	-2.8979	5.6989	-3.0968	0.0050689	0.2168	-2.0946	PTGDR2	prostaglandin D2 receptor 2
158219	-1.9748	5.2322	-3.0963	0.0050744	0.2168	-2.0955	TTC39B	tetratricopeptide repeat domain 39B
2983	-2.2452	4.7107	-3.091	0.0051387	0.21898	-2.1066	GUCY1B1	guanylate cyclase 1 soluble subunit beta 1
388125	2.1868	6.2749	3.09	0.0051507	0.21898	-2.1086	C2CD4B	C2 calcium dependent domain containing 4B
128178	1.5062	11.736	3.0831	0.0052363	0.21968	-2.123	EDARADD	EDAR associated death domain
441307	-2.0549	2.9726	-3.083	0.0052367	0.21968	-2.1231	HRAT92	heart tissue-associated transcript 92
25914	-2.4273	4.1979	-3.0824	0.0052444	0.21968	-2.1244	RTTN	rotatin
11262	-1.8647	9.6225	-3.0818	0.005252	0.21968	-2.1256	SP140	SP140 nuclear body protein
51302	1.7135	3.6948	3.0811	0.0052604	0.21968	-2.127	CYP39A1	cytochrome P450 family 39 subfamily A member 1
6001	-2.1573	11.825	-3.0809	0.0052636	0.21968	-2.1275	RGS10	regulator of G protein signaling 10
6773	-1.9598	13.401	-3.0802	0.0052721	0.21968	-2.129	STAT2	signal transducer and activator of transcription 2
3725	2.3935	9.7795	3.0802	0.0052721	0.21968	-2.129	JUN	"Jun proto-oncogene, AP-1 transcription factor subunit"
1992	1.7833	15.767	3.0788	0.0052895	0.21968	-2.1318	SERPINB1	serpin family B member 1
2999	-3.3309	9.6395	-3.0785	0.0052938	0.21968	-2.1325	GZMH	granzyme H
645840	1.8788	2.8417	3.0772	0.0053102	0.21984	-2.1353	645840	NA
375346	1.8781	10.217	3.0735	0.0053558	0.21995	-2.1427	STIMATE	STIM activating enhancer
921	-3.0353	7.3368	-3.0719	0.0053762	0.21995	-2.146	CD5	CD5 molecule
3820	-2.7657	8.5218	-3.0688	0.0054158	0.21995	-2.1525	KLRB1	killer cell lectin like receptor B1
55901	-2.4883	6.4176	-3.0685	0.0054204	0.21995	-2.1532	THSD1	thrombospondin type 1 domain containing 1
7561	-1.5715	6.9049	-3.0685	0.0054205	0.21995	-2.1532	ZNF14	zinc finger protein 14
4638	-1.9086	4.9457	-3.0671	0.0054384	0.21995	-2.1561	MYLK	myosin light chain kinase
401190	1.5896	3.4371	3.0662	0.0054491	0.21995	-2.1578	RGS7BP	regulator of G protein signaling 7 binding protein
3765	1.7042	3.2406	3.0662	0.0054499	0.21995	-2.1579	KCNJ9	potassium inwardly rectifying channel subfamily J member 9
153910	1.4817	2.9971	3.0654	0.0054604	0.21995	-2.1596	LOC153910	uncharacterized LOC153910
5473	-2.6086	10.252	-3.0653	0.0054614	0.21995	-2.1598	PPBP	pro-platelet basic protein
202134	-2.2287	2.9101	-3.064	0.0054776	0.21995	-2.1624	FAM153B	family with sequence similarity 153 member B
288	-1.8282	4.6324	-3.0609	0.0055179	0.21995	-2.1688	ANK3	ankyrin 3
2865	2.3168	10.583	3.0595	0.0055366	0.21995	-2.1717	FFAR3	free fatty acid receptor 3
254057	-2.0365	3.3658	-3.0567	0.005574	0.21995	-2.1776	254057	NA
4359	1.7827	4.7706	3.056	0.0055822	0.21995	-2.1789	MPZ	myelin protein zero
23344	-1.7493	7.8961	-3.0546	0.0056014	0.21995	-2.1819	ESYT1	extended synaptotagmin 1
54843	-2.5748	5.6271	-3.0539	0.0056111	0.21995	-2.1834	SYTL2	synaptotagmin like 2
283316	2.2398	5.7675	3.0538	0.0056115	0.21995	-2.1835	CD163L1	CD163 molecule like 1
132001	-2.0881	7.2971	-3.0538	0.0056118	0.21995	-2.1835	TAMM41	TAM41 mitochondrial translocator assembly and maintenance homolog
55177	-1.5397	7.9001	-3.0525	0.0056289	0.21995	-2.1862	RMDN3	regulator of microtubule dynamics 3
440503	2.404	12.215	3.0497	0.0056662	0.21995	-2.1919	PLIN5	perilipin 5
2207	1.9634	16.586	3.0496	0.0056679	0.21995	-2.1922	FCER1G	Fc fragment of IgE receptor Ig
6309	-1.8751	3.4949	-3.0495	0.0056696	0.21995	-2.1925	SC5D	sterol-C5-desaturase
9478	1.6312	3.4893	3.0492	0.0056731	0.21995	-2.193	CABP1	calcium binding protein 1
29904	-1.9478	7.5762	-3.0488	0.0056786	0.21995	-2.1939	EEF2K	eukaryotic elongation factor 2 kinase
353514	2.3337	11.88	3.0485	0.0056829	0.21995	-2.1945	LILRA5	leukocyte immunoglobulin like receptor A5
10149	2.2644	3.8411	3.0478	0.0056924	0.21995	-2.196	ADGRG2	adhesion G protein-coupled receptor G2
6894	-2.2947	6.3787	-3.0466	0.0057083	0.21995	-2.1984	TARBP1	TAR (HIV-1) RNA binding protein 1
100506462	1.4469	5.2542	3.0465	0.005709	0.21995	-2.1985	SRD5A3-AS1	SRD5A3 antisense RNA 1
3067	-2.5006	7.7984	-3.0465	0.0057091	0.21995	-2.1985	HDC	histidine decarboxylase
26873	2.2843	10.981	3.0456	0.0057214	0.21995	-2.2004	OPLAH	"5-oxoprolinase, ATP-hydrolysing"
131544	-2.7695	4.3896	-3.0453	0.0057258	0.21995	-2.2011	CRYBG3	crystallin beta-gamma domain containing 3
214	1.7423	9.8281	3.0444	0.0057375	0.21995	-2.2029	ALCAM	activated leukocyte cell adhesion molecule
2053	-1.8189	5.9603	-3.0439	0.005744	0.21995	-2.2039	EPHX2	epoxide hydrolase 2
147015	1.8708	12.249	3.0362	0.00585	0.22273	-2.2198	DHRS13	dehydrogenase/reductase 13
4673	-1.7869	10.372	-3.0355	0.005859	0.22273	-2.2212	NAP1L1	nucleosome assembly protein 1 like 1
100505827	1.8869	3.0295	3.0343	0.0058758	0.22273	-2.2237	100505827	NA
100131043	1.8248	8.488	3.0342	0.0058777	0.22273	-2.2239	100131043	NA
654434	-1.5891	6.031	-3.0316	0.0059136	0.22273	-2.2293	SNHG20	small nucleolar RNA host gene 20
79132	-1.9101	10.67	-3.0313	0.0059176	0.22273	-2.2299	DHX58	DExH-box helicase 58
3003	-2.9803	7.2604	-3.03	0.0059356	0.22273	-2.2325	GZMK	granzyme K
5730	-2.0679	8.3394	-3.0299	0.0059368	0.22273	-2.2327	PTGDS	prostaglandin D2 synthase
3903	2.4165	11.506	3.0297	0.0059406	0.22273	-2.2332	LAIR1	leukocyte associated immunoglobulin like receptor 1
29967	-1.9146	3.4616	-3.0284	0.0059587	0.22273	-2.2359	LRP12	LDL receptor related protein 12
51744	-1.7985	7.2424	-3.0278	0.0059671	0.22273	-2.2371	CD244	CD244 molecule
3026	1.4476	2.9838	3.0275	0.0059707	0.22273	-2.2376	HABP2	hyaluronan binding protein 2
57659	-1.9424	8.0285	-3.0237	0.0060253	0.22428	-2.2456	ZBTB4	zinc finger and BTB domain containing 4
2570	2.0294	4.402	3.022	0.0060487	0.22456	-2.249	GABRR2	gamma-aminobutyric acid type A receptor subunit rho2
8718	-2.5695	7.9512	-3.0203	0.0060738	0.22456	-2.2526	TNFRSF25	TNF receptor superfamily member 25
100874151	-2.0983	5.0954	-3.02	0.006077	0.22456	-2.253	LINC00381	long intergenic non-protein coding RNA 381
79809	-1.3444	5.6455	-3.0195	0.0060846	0.22456	-2.2541	TTC21B	tetratricopeptide repeat domain 21B
3575	-2.6998	9.7008	-3.0173	0.0061163	0.22488	-2.2587	IL7R	interleukin 7 receptor
4599	-2.5761	13.249	-3.0169	0.0061215	0.22488	-2.2594	MX1	MX dynamin like GTPase 1
1298	1.6479	8.5934	3.0141	0.0061631	0.22488	-2.2653	COL9A2	collagen type IX alpha 2 chain
22836	-2.4962	3.2574	-3.0138	0.0061663	0.22488	-2.2658	RHOBTB3	Rho related BTB domain containing 3
8530	2.0318	13.795	3.0134	0.0061733	0.22488	-2.2668	CST7	cystatin F
56911	-2.73	4.3737	-3.0121	0.0061914	0.22488	-2.2693	MAP3K7CL	MAP3K7 C-terminal like
112609	1.6131	2.771	3.0118	0.0061956	0.22488	-2.2699	MRAP2	melanocortin 2 receptor accessory protein 2
57189	-2.9299	5.7769	-3.0105	0.0062143	0.22488	-2.2725	DENND11	DENN domain containing 11
8809	2.3796	10.981	3.0102	0.00622	0.22488	-2.2733	IL18R1	interleukin 18 receptor 1
4317	2.5961	4.9747	3.0097	0.006226	0.22488	-2.2742	MMP8	matrix metallopeptidase 8
9737	-2.2664	5.566	-3.0081	0.0062506	0.22488	-2.2776	GPRASP1	G protein-coupled receptor associated sorting protein 1
54809	-2.1046	8.9711	-3.0078	0.006255	0.22488	-2.2782	SAMD9	sterile alpha motif domain containing 9
55160	-2.3036	6.5461	-3.0071	0.0062643	0.22488	-2.2795	ARHGEF10L	Rho guanine nucleotide exchange factor 10 like
3821	-2.6928	6.1357	-3.0062	0.0062782	0.22488	-2.2815	KLRC1	killer cell lectin like receptor C1
100289495	1.6423	8.422	3.0055	0.0062891	0.22488	-2.283	LOC100289495	uncharacterized LOC100289495
29103	-1.9377	6.6542	-3.0042	0.006308	0.22488	-2.2856	DNAJC15	DnaJ heat shock protein family (Hsp40) member C15
54498	-2.357	7.1602	-3.0038	0.0063138	0.22488	-2.2864	SMOX	spermine oxidase
64595	-2.66	6.8619	-2.9996	0.0063765	0.22665	-2.295	TTTY15	"testis-specific transcript, Y-linked 15"
100133941	1.6232	11.092	2.9967	0.0064197	0.22686	-2.3009	CD24	CD24 molecule
283742	-1.582	3.2357	-2.9961	0.0064288	0.22686	-2.3021	FAM98B	family with sequence similarity 98 member B
30008	1.786	9.9366	2.996	0.0064299	0.22686	-2.3023	EFEMP2	EGF containing fibulin extracellular matrix protein 2
10941	1.5321	3.5136	2.9956	0.0064371	0.22686	-2.3033	UGT2A1	UDP glucuronosyltransferase family 2 member A1 complex locus
259293	-1.5002	5.9241	-2.9949	0.0064478	0.22686	-2.3047	TAS2R30	taste 2 receptor member 30
63898	1.6272	2.9503	2.9921	0.0064891	0.22705	-2.3103	SH2D4A	SH2 domain containing 4A
4088	-1.9373	8.4059	-2.9919	0.0064931	0.22705	-2.3108	SMAD3	SMAD family member 3
441317	1.7273	4.3022	2.9913	0.0065019	0.22705	-2.312	FAM90A7P	"family with sequence similarity 90 member A7, pseudogene"
4953	-1.9754	10.092	-2.9904	0.0065153	0.22705	-2.3138	ODC1	ornithine decarboxylase 1
211	1.5698	9.8186	2.9902	0.0065185	0.22705	-2.3142	ALAS1	5'-aminolevulinate synthase 1
2235	-2.3721	6.6877	-2.9878	0.0065558	0.22789	-2.3192	FECH	ferrochelatase
338339	2.3523	12.998	2.9865	0.0065752	0.22798	-2.3218	CLEC4D	C-type lectin domain family 4 member D
51738	2.001	11.493	2.9859	0.0065846	0.22798	-2.323	GHRL	ghrelin and obestatin prepropeptide
23119	-1.7684	8.0481	-2.9812	0.0066573	0.22959	-2.3326	HIC2	HIC ZBTB transcriptional repressor 2
4261	-2.0142	8.147	-2.9812	0.0066578	0.22959	-2.3326	CIITA	class II major histocompatibility complex transactivator
404201	1.5937	8.5249	2.979	0.0066918	0.23031	-2.3371	WDFY3-AS2	WDFY3 antisense RNA 2
387751	-2.4135	5.9756	-2.9765	0.006731	0.23093	-2.3422	GVINP1	"GTPase, very large interferon inducible pseudogene 1"
100131262	-1.7402	6.9378	-2.9754	0.0067492	0.23093	-2.3445	100131262	NA
4300	-1.9223	4.9251	-2.9754	0.0067498	0.23093	-2.3446	MLLT3	MLLT3 super elongation complex subunit
56947	1.5047	13.028	2.9725	0.0067953	0.232	-2.3505	MFF	mitochondrial fission factor
29851	-1.9973	6.3857	-2.9692	0.0068485	0.232	-2.3573	ICOS	inducible T cell costimulator
10947	-2.1172	6.7825	-2.9689	0.0068534	0.232	-2.3579	AP3M2	adaptor related protein complex 3 subunit mu 2
5021	-1.7637	3.398	-2.9682	0.0068643	0.232	-2.3593	OXTR	oxytocin receptor
81606	-2.1355	7.2528	-2.9674	0.0068768	0.232	-2.3608	LBH	LBH regulator of WNT signaling pathway
51276	-2.1062	4.0819	-2.9673	0.006879	0.232	-2.3611	ZNF571	zinc finger protein 571
336	1.3884	2.5523	2.9668	0.0068873	0.232	-2.3622	APOA2	apolipoprotein A2
1088	1.9201	9.201	2.9663	0.0068941	0.232	-2.363	CEACAM8	CEA cell adhesion molecule 8
63947	-1.7733	3.6336	-2.9659	0.0069015	0.232	-2.364	DMRTC1	DMRT like family C1
950	-1.9741	9.5547	-2.9642	0.0069279	0.23213	-2.3673	SCARB2	scavenger receptor class B member 2
388965	-1.3751	8.1317	-2.9638	0.0069359	0.23213	-2.3683	FUNDC2P2	FUN14 domain containing 2 pseudogene 2
10578	-2.8763	8.1659	-2.9629	0.0069491	0.23213	-2.37	GNLY	granulysin
79603	1.6793	8.7675	2.9622	0.0069608	0.23213	-2.3714	CERS4	ceramide synthase 4
25939	-1.7361	8.5778	-2.9615	0.0069721	0.23213	-2.3728	SAMHD1	SAM and HD domain containing deoxynucleoside triphosphate triphosphohydrolase 1
149478	1.7903	6.4701	2.9604	0.0069903	0.23217	-2.3751	BTBD19	BTB domain containing 19
3934	2.4499	10.329	2.9587	0.0070186	0.23217	-2.3786	LCN2	lipocalin 2
619564	-2.02	4.657	-2.9571	0.007045	0.23217	-2.3819	SNORD72	"small nucleolar RNA, C/D box 72"
9729	-1.6461	3.556	-2.9566	0.0070536	0.23217	-2.383	KIAA0408	KIAA0408
283337	-1.5297	5.5414	-2.9566	0.0070537	0.23217	-2.383	ZNF740	zinc finger protein 740
9706	-1.5272	5.811	-2.9566	0.0070537	0.23217	-2.383	ULK2	unc-51 like autophagy activating kinase 2
9636	-2.8611	13.158	-2.9541	0.0070945	0.23304	-2.388	ISG15	ISG15 ubiquitin like modifier
29906	1.7555	6.4561	2.9528	0.007116	0.23304	-2.3906	ST8SIA5	"ST8 alpha-N-acetyl-neuraminide alpha-2,8-sialyltransferase 5"
28984	-1.9897	9.2354	-2.9517	0.0071344	0.23304	-2.3929	RGCC	regulator of cell cycle
80003	-1.6075	6.09	-2.951	0.0071456	0.23304	-2.3942	PCNX2	pecanex 2
11118	-2.185	10.514	-2.9507	0.0071503	0.23304	-2.3948	BTN3A2	butyrophilin subfamily 3 member A2
51161	-2.1626	5.34	-2.9495	0.0071704	0.23304	-2.3973	C3orf18	chromosome 3 open reading frame 18
1633	-1.7489	7.5177	-2.9493	0.007174	0.23304	-2.3977	DCK	deoxycytidine kinase
644186	2.1975	7.8578	2.9485	0.0071887	0.23308	-2.3995	SYCE3	synaptonemal complex central element protein 3
100874083	1.6275	2.9207	2.9429	0.0072824	0.23514	-2.4108	KCNAB1-AS2	KCNAB1 antisense RNA 2
914	-2.4816	8.9273	-2.9429	0.007283	0.23514	-2.4108	CD2	CD2 molecule
10225	-3.2169	6.2066	-2.9423	0.0072929	0.23514	-2.412	CD96	CD96 molecule
3778	2.854	6.9651	2.9391	0.0073472	0.23538	-2.4185	KCNMA1	potassium calcium-activated channel subfamily M alpha 1
2623	-2.3556	5.4068	-2.9385	0.0073581	0.23538	-2.4197	GATA1	GATA binding protein 1
7783	2.1251	3.5789	2.9384	0.0073605	0.23538	-2.42	ZP2	zona pellucida glycoprotein 2
90355	2.4284	9.4047	2.9379	0.0073682	0.23538	-2.4209	MACIR	macrophage immunometabolism regulator
79796	-2.0171	3.8225	-2.9379	0.0073682	0.23538	-2.4209	ALG9	"ALG9 alpha-1,2-mannosyltransferase"
80271	1.8363	11.219	2.9369	0.0073859	0.23551	-2.423	ITPKC	inositol-trisphosphate 3-kinase C
143884	-1.5887	7.7322	-2.9355	0.0074103	0.23585	-2.4259	CWF19L2	CWF19 like cell cycle control factor 2
151651	1.5456	4.6751	2.9317	0.0074752	0.23727	-2.4335	EFHB	EF-hand domain family member B
11043	-1.9201	3.0267	-2.9313	0.0074822	0.23727	-2.4343	MID2	midline 2
284486	-2.592	4.7001	-2.9294	0.0075156	0.23789	-2.4382	THEM5	thioesterase superfamily member 5
55437	-2.3596	8.1877	-2.9255	0.0075839	0.23916	-2.446	STRADB	STE20 related adaptor beta
26064	-1.4404	3.7155	-2.9245	0.0076027	0.23916	-2.4482	RAI14	retinoic acid induced 14
23070	-1.5999	8.1436	-2.924	0.0076115	0.23916	-2.4492	CMTR1	cap methyltransferase 1
23180	-2.8518	7.501	-2.9234	0.0076211	0.23916	-2.4503	RFTN1	"raftlin, lipid raft linker 1"
81794	-1.6329	6.4893	-2.9232	0.0076247	0.23916	-2.4507	ADAMTS10	ADAM metallopeptidase with thrombospondin type 1 motif 10
3957	-3.0462	8.2368	-2.9198	0.0076866	0.24064	-2.4577	LGALS2	galectin 2
123036	-3.0867	4.7995	-2.9183	0.0077132	0.24064	-2.4608	TC2N	"tandem C2 domains, nuclear"
162699	1.7988	3.0829	2.9166	0.0077434	0.24064	-2.4641	ELOA3	elongin A3
92291	1.7278	7.6513	2.9159	0.0077567	0.24064	-2.4656	CAPN13	calpain 13
57719	-2.8622	4.0093	-2.9155	0.0077642	0.24064	-2.4665	ANO8	anoctamin 8
2787	1.7785	13.853	2.9153	0.0077669	0.24064	-2.4668	GNG5	G protein subunit gamma 5
2647	2.0181	11.614	2.9145	0.0077811	0.24064	-2.4684	BLOC1S1	biogenesis of lysosomal organelles complex 1 subunit 1
1604	1.5878	14.427	2.9144	0.0077826	0.24064	-2.4685	CD55	CD55 molecule (Cromer blood group)
6929	-2.122	7.8283	-2.9101	0.0078618	0.24265	-2.4773	TCF3	transcription factor 3
3773	1.888	3.5271	2.9076	0.007908	0.24365	-2.4824	KCNJ16	potassium inwardly rectifying channel subfamily J member 16
200316	-1.7469	7.1092	-2.9068	0.0079228	0.24367	-2.4841	APOBEC3F	apolipoprotein B mRNA editing enzyme catalytic subunit 3F
100506211	2.0078	3.7489	2.9057	0.0079424	0.24373	-2.4862	MIR210HG	MIR210 host gene
57583	-2.0916	8.6467	-2.9045	0.0079649	0.24373	-2.4887	TMEM181	transmembrane protein 181
7757	-2.2533	6.7952	-2.9026	0.008001	0.24373	-2.4926	ZNF208	zinc finger protein 208
83886	1.5189	5.2495	2.902	0.0080123	0.24373	-2.4938	PRSS27	serine protease 27
8287	-2.2917	6.3953	-2.9013	0.0080253	0.24373	-2.4952	USP9Y	ubiquitin specific peptidase 9 Y-linked
8613	1.45	6.1763	2.9012	0.0080269	0.24373	-2.4954	PLPP3	phospholipid phosphatase 3
131450	-1.5012	4.2069	-2.9009	0.0080312	0.24373	-2.4959	CD200R1	CD200 receptor 1
7220	-2.0113	2.6913	-2.9006	0.0080372	0.24373	-2.4965	TRPC1	transient receptor potential cation channel subfamily C member 1
8111	-2.2138	6.5182	-2.8973	0.0080996	0.2448	-2.5032	GPR68	G protein-coupled receptor 68
9880	-1.9887	3.0706	-2.8972	0.0081007	0.2448	-2.5034	ZBTB39	zinc finger and BTB domain containing 39
84941	-1.6236	12.352	-2.8958	0.0081272	0.24517	-2.5062	HSH2D	hematopoietic SH2 domain containing
201895	1.4184	11.422	2.8945	0.0081528	0.24517	-2.5089	SMIM14	small integral membrane protein 14
840	-2.3972	8.525	-2.8938	0.0081662	0.24517	-2.5104	CASP7	caspase 7
923	-2.5623	8.3484	-2.8936	0.0081694	0.24517	-2.5107	CD6	CD6 molecule
163223	-1.8909	7.4141	-2.8918	0.0082036	0.24577	-2.5143	ZNF676	zinc finger protein 676
10769	1.9758	9.6823	2.8906	0.0082275	0.24606	-2.5169	PLK2	polo like kinase 2
8459	1.5316	13.144	2.8872	0.0082917	0.24755	-2.5236	TPST2	tyrosylprotein sulfotransferase 2
222663	-1.6899	4.7745	-2.8849	0.008337	0.24848	-2.5284	SCUBE3	"signal peptide, CUB domain and EGF like domain containing 3"
80018	-1.8558	5.5625	-2.8839	0.0083558	0.24848	-2.5303	NAA25	"N-alpha-acetyltransferase 25, NatB auxiliary subunit"
117144	2.1363	8.6317	2.8834	0.0083657	0.24848	-2.5313	CATSPER1	cation channel sperm associated 1
11076	-2.5894	4.4247	-2.882	0.0083934	0.24887	-2.5342	TPPP	tubulin polymerization promoting protein
9688	-1.4676	7.3446	-2.8799	0.0084336	0.24964	-2.5384	NUP93	nucleoporin 93
79623	2.7731	12.294	2.8782	0.0084672	0.24998	-2.5418	GALNT14	polypeptide N-acetylgalactosaminyltransferase 14
29909	-1.7435	8.6905	-2.8763	0.0085052	0.24998	-2.5457	GPR171	G protein-coupled receptor 171
4162	1.6689	6.2129	2.876	0.0085108	0.24998	-2.5463	MCAM	melanoma cell adhesion molecule
5957	1.9847	5.7479	2.8758	0.0085145	0.24998	-2.5466	RCVRN	recoverin
3126	-2.9659	9.0298	-2.8757	0.0085171	0.24998	-2.5469	3126	NA
79884	-1.8289	3.2342	-2.8739	0.0085513	0.25033	-2.5504	MAP9	microtubule associated protein 9
9100	1.7039	13.071	2.8736	0.0085581	0.25033	-2.5511	USP10	ubiquitin specific peptidase 10
100130232	1.6421	3.4651	2.8699	0.0086319	0.25207	-2.5585	100130232	NA
114928	-1.6074	2.3906	-2.8676	0.0086787	0.25258	-2.5632	GPRASP2	G protein-coupled receptor associated sorting protein 2
4771	-1.985	8.1464	-2.866	0.0087097	0.25258	-2.5663	NF2	neurofibromin 2
10239	1.7168	11.321	2.8649	0.0087326	0.25258	-2.5686	AP3S2	adaptor related protein complex 3 subunit sigma 2
9310	-1.7528	6.5584	-2.8644	0.0087423	0.25258	-2.5696	ZNF235	zinc finger protein 235
114991	-1.8065	3.4842	-2.8642	0.0087459	0.25258	-2.5699	ZNF618	zinc finger protein 618
283578	1.3239	5.9423	2.8634	0.0087625	0.25258	-2.5716	TMED8	transmembrane p24 trafficking protein family member 8
55002	1.4271	8.8128	2.8631	0.0087684	0.25258	-2.5722	TMCO3	transmembrane and coiled-coil domains 3
83862	1.8457	12.381	2.8623	0.0087842	0.25258	-2.5737	TMEM120A	transmembrane protein 120A
29969	-2.5692	5.9035	-2.8622	0.0087872	0.25258	-2.574	MDFIC	MyoD family inhibitor domain containing
3433	-2.3111	12.945	-2.8615	0.0088017	0.25258	-2.5754	IFIT2	interferon induced protein with tetratricopeptide repeats 2
25923	1.5973	9.9003	2.8603	0.0088258	0.25258	-2.5778	ATL3	atlastin GTPase 3
5616	-1.4385	9.1661	-2.8595	0.0088429	0.25258	-2.5795	PRKY	protein kinase Y-linked (pseudogene)
56969	1.6051	4.9673	2.8589	0.0088554	0.25258	-2.5807	RPL23AP32	ribosomal protein L23a pseudogene 32
5265	1.5665	15.04	2.8586	0.0088601	0.25258	-2.5812	SERPINA1	serpin family A member 1
56034	2.1508	9.1549	2.8583	0.0088679	0.25258	-2.5819	PDGFC	platelet derived growth factor C
51309	-1.6447	4.8991	-2.8573	0.0088875	0.25272	-2.5839	ARMCX1	armadillo repeat containing X-linked 1
145264	1.4216	3.9676	2.8549	0.0089369	0.25371	-2.5887	SERPINA12	serpin family A member 12
55876	-1.6837	9.202	-2.8539	0.0089572	0.25388	-2.5906	GSDMB	gasdermin B
339906	-1.6997	3.8594	-2.8519	0.0089989	0.25394	-2.5947	PRSS42P	"serine protease 42, pseudogene"
24141	-1.6604	5.8287	-2.8513	0.0090118	0.25394	-2.5959	LAMP5	lysosomal associated membrane protein family member 5
3761	1.7554	3.3358	2.8497	0.0090444	0.25394	-2.599	KCNJ4	potassium inwardly rectifying channel subfamily J member 4
2625	-2.1908	5.2896	-2.8497	0.0090456	0.25394	-2.5992	GATA3	GATA binding protein 3
5465	-1.4677	5.0746	-2.8491	0.009058	0.25394	-2.6003	PPARA	peroxisome proliferator activated receptor alpha
374882	1.756	12.424	2.8486	0.0090683	0.25394	-2.6013	TMEM205	transmembrane protein 205
23586	-1.7291	10.601	-2.8478	0.009086	0.25394	-2.603	DDX58	DExD/H-box helicase 58
84725	-2.311	3.3719	-2.8475	0.0090912	0.25394	-2.6035	PLEKHA8	pleckstrin homology domain containing A8
4698	-1.4468	9.9306	-2.8468	0.0091054	0.25394	-2.6049	NDUFA5	NADH:ubiquinone oxidoreductase subunit A5
23305	-2.6288	4.2922	-2.8457	0.0091289	0.25394	-2.6071	ACSL6	acyl-CoA synthetase long chain family member 6
51348	-2.8288	6.0759	-2.8456	0.0091319	0.25394	-2.6074	KLRF1	killer cell lectin like receptor F1
3552	2.4662	4.58	2.8439	0.0091664	0.25394	-2.6107	IL1A	interleukin 1 alpha
554223	2.2416	7.5458	2.8436	0.0091733	0.25394	-2.6113	554223	NA
155060	-1.6367	5.806	-2.8415	0.009219	0.25394	-2.6156	LOC155060	AI894139 pseudogene
728099	1.8302	2.8606	2.8412	0.0092257	0.25394	-2.6163	728099	NA
4684	-1.9533	4.1335	-2.8407	0.0092349	0.25394	-2.6171	NCAM1	neural cell adhesion molecule 1
5080	2.1631	6.0838	2.8404	0.0092416	0.25394	-2.6178	PAX6	paired box 6
23654	-1.9545	6.7286	-2.8399	0.0092516	0.25394	-2.6187	PLXNB2	plexin B2
23171	-1.7051	6.6184	-2.8395	0.009262	0.25394	-2.6197	GPD1L	glycerol-3-phosphate dehydrogenase 1 like
152579	-2.1128	5.6939	-2.8393	0.0092645	0.25394	-2.6199	SCFD2	sec1 family domain containing 2
2169	1.9306	2.9312	2.839	0.0092724	0.25394	-2.6206	FABP2	fatty acid binding protein 2
5551	-2.1329	6.7759	-2.8376	0.009302	0.25394	-2.6234	PRF1	perforin 1
10693	-1.6389	5.459	-2.8375	0.0093044	0.25394	-2.6236	CCT6B	chaperonin containing TCP1 subunit 6B
80111	1.4245	3.0239	2.8372	0.009311	0.25394	-2.6242	C3orf36	chromosome 3 putative open reading frame 36
719	1.9328	12.605	2.8338	0.009384	0.25448	-2.631	C3AR1	complement C3a receptor 1
122945	1.3984	2.9906	2.8325	0.009413	0.25448	-2.6337	NOXRED1	NADP dependent oxidoreductase domain containing 1
646862	1.8635	9.8604	2.8325	0.0094131	0.25448	-2.6337	RNF225	ring finger protein 225
133	2.1541	16.555	2.8324	0.009414	0.25448	-2.6338	ADM	adrenomedullin
245	1.7689	2.9387	2.8322	0.0094185	0.25448	-2.6342	ALOX12P2	arachidonate 12-lipoxygenase pseudogene 2
9886	-1.9432	6.4063	-2.8306	0.0094536	0.25448	-2.6374	RHOBTB1	Rho related BTB domain containing 1
286058	-2.9474	8.6633	-2.8297	0.0094741	0.25448	-2.6393	286058	NA
51176	-2.7832	8.2582	-2.8293	0.0094828	0.25448	-2.6401	LEF1	lymphoid enhancer binding factor 1
84223	-1.7369	2.6518	-2.8284	0.0095021	0.25448	-2.6419	IQCG	IQ motif containing G
23279	-1.7322	8.0817	-2.828	0.0095112	0.25448	-2.6427	NUP160	nucleoporin 160
284688	1.6566	3.023	2.8277	0.0095163	0.25448	-2.6431	LINC01142	long intergenic non-protein coding RNA 1142
85015	-1.5858	3.8163	-2.8273	0.0095249	0.25448	-2.6439	USP45	ubiquitin specific peptidase 45
273	1.7762	7.588	2.8271	0.009529	0.25448	-2.6443	AMPH	amphiphysin
11123	-1.7407	6.3806	-2.8268	0.009536	0.25448	-2.6449	RCAN3	RCAN family member 3
285154	1.6479	7.2537	2.8251	0.0095734	0.25496	-2.6483	CYP1B1-AS1	CYP1B1 antisense RNA 1
687	2.0554	11.196	2.8243	0.0095929	0.25496	-2.6501	KLF9	Kruppel like factor 9
257101	-2.635	6.4792	-2.824	0.0095981	0.25496	-2.6506	ZNF683	zinc finger protein 683
10226	1.6318	11.024	2.8232	0.0096173	0.25508	-2.6523	PLIN3	perilipin 3
64167	-2.4379	8.2893	-2.8223	0.009637	0.25521	-2.6541	ERAP2	endoplasmic reticulum aminopeptidase 2
762	2.4121	11.335	2.8199	0.0096905	0.2556	-2.6589	CA4	carbonic anhydrase 4
10418	-1.5591	2.888	-2.8197	0.0096945	0.2556	-2.6592	SPON1	spondin 1
10648	1.8921	2.7667	2.8193	0.0097027	0.2556	-2.66	SCGB1D1	secretoglobin family 1D member 1
56944	1.487	4.6568	2.8188	0.0097142	0.2556	-2.661	OLFML3	olfactomedin like 3
254896	2.0581	12.483	2.818	0.0097322	0.2556	-2.6626	LOC254896	uncharacterized LOC254896
400242	1.7673	8.1669	2.817	0.009754	0.2556	-2.6645	DICER1-AS1	DICER1 antisense RNA 1
79621	-1.6793	9.136	-2.817	0.0097548	0.2556	-2.6646	RNASEH2B	ribonuclease H2 subunit B
91947	1.9789	9.5528	2.8156	0.0097852	0.25601	-2.6673	ARRDC4	arrestin domain containing 4
55024	-2.0975	7.2655	-2.8148	0.0098049	0.25614	-2.669	BANK1	B cell scaffold protein with ankyrin repeats 1
4430	2.5808	3.6917	2.8136	0.0098325	0.25647	-2.6715	MYO1B	myosin IB
10211	1.7398	13.879	2.8126	0.0098544	0.25666	-2.6734	FLOT1	flotillin 1
4938	-3.5492	8.0651	-2.8105	0.0099025	0.25752	-2.6776	OAS1	2'-5'-oligoadenylate synthetase 1
3268	-1.677	4.9064	-2.8089	0.0099379	0.25797	-2.6807	AGFG2	ArfGAP with FG repeats 2
642623	1.6194	3.0297	2.8084	0.0099501	0.25797	-2.6818	UBTFL1	upstream binding transcription factor like 1
158427	-1.6527	5.1871	-2.8078	0.0099643	0.25797	-2.683	TSTD2	thiosulfate sulfurtransferase like domain containing 2
25902	1.4442	5.7782	2.8067	0.0099882	0.25821	-2.6851	MTHFD1L	methylenetetrahydrofolate dehydrogenase (NADP+ dependent) 1 like
100131023	1.3543	3.0631	2.8053	0.010022	0.25868	-2.688	100131023	NA
50852	-2.8644	5.7808	-2.8034	0.010064	0.25917	-2.6917	TRAT1	T cell receptor associated transmembrane adaptor 1
414765	-1.6322	5.6226	-2.8032	0.01007	0.25917	-2.6922	HCG25	HLA complex group 25
8724	1.6417	13.778	2.802	0.010097	0.25946	-2.6944	SNX3	sorting nexin 3
3824	-3.0477	5.9801	-2.8006	0.010129	0.25992	-2.6972	KLRD1	killer cell lectin like receptor D1
83692	1.7045	10.892	2.7991	0.010165	0.26027	-2.7002	CD99L2	CD99 molecule like 2
157285	-1.6464	7.733	-2.7987	0.010173	0.26027	-2.701	PRAG1	"PEAK1 related, kinase-activating pseudokinase 1"
6480	-1.8817	10.563	-2.7939	0.010288	0.26243	-2.7107	ST6GAL1	"ST6 beta-galactoside alpha-2,6-sialyltransferase 1"
200010	1.6136	5.9827	2.7926	0.010317	0.26243	-2.7131	SLC5A9	solute carrier family 5 member 9
3490	1.9596	10.964	2.7926	0.010317	0.26243	-2.7131	IGFBP7	insulin like growth factor binding protein 7
390061	1.9644	3.4515	2.7926	0.010319	0.26243	-2.7133	OR51Q1	olfactory receptor family 51 subfamily Q member 1 (gene/pseudogene)
133383	1.2731	7.9784	2.792	0.010333	0.26243	-2.7145	SETD9	SET domain containing 9
219899	-1.8836	6.0104	-2.7901	0.010377	0.26267	-2.7181	TBCEL	tubulin folding cofactor E like
80739	-1.361	7.8759	-2.7892	0.010398	0.26267	-2.7199	MPIG6B	megakaryocyte and platelet inhibitory receptor G6b
100506779	-1.2441	8.4093	-2.7888	0.010407	0.26267	-2.7207	TSPOAP1-AS1	"TSPOAP1, SUPT4H1 and RNF43 antisense RNA 1"
100190949	1.4434	3.1241	2.7885	0.010416	0.26267	-2.7214	C5orf52	chromosome 5 open reading frame 52
114824	-1.4671	8.2939	-2.7878	0.010433	0.26267	-2.7228	PNMA5	PNMA family member 5
1021	-2.0923	7.6018	-2.7878	0.010434	0.26267	-2.7228	CDK6	cyclin dependent kinase 6
987	-2.0558	6.8681	-2.786	0.010475	0.26306	-2.7262	LRBA	LPS responsive beige-like anchor protein
1346	1.3193	3.961	2.7858	0.010479	0.26306	-2.7266	COX7A1	cytochrome c oxidase subunit 7A1
7226	1.8392	9.3119	2.7834	0.010539	0.26392	-2.7316	TRPM2	transient receptor potential cation channel subfamily M member 2
79658	-2.2901	3.9896	-2.7829	0.010551	0.26392	-2.7325	ARHGAP10	Rho GTPase activating protein 10
169714	-1.4548	6.5721	-2.7824	0.010562	0.26392	-2.7334	QSOX2	quiescin sulfhydryl oxidase 2
8836	1.5401	9.9364	2.7819	0.010574	0.26392	-2.7344	GGH	gamma-glutamyl hydrolase
26249	-2.6102	4.7838	-2.7807	0.010603	0.26393	-2.7368	KLHL3	kelch like family member 3
100505564	1.9607	7.6609	2.7806	0.010605	0.26393	-2.737	100505564	NA
11164	1.4332	12.813	2.78	0.01062	0.26393	-2.7382	NUDT5	nudix hydrolase 5
7167	1.3711	13.549	2.7786	0.010656	0.26444	-2.7411	TPI1	triosephosphate isomerase 1
23336	-2.6561	3.8836	-2.7764	0.01071	0.26531	-2.7455	SYNM	synemin
200420	-1.8937	4.5116	-2.7759	0.010722	0.26531	-2.7464	ALMS1P1	ALMS1 pseudogene 1
57097	-1.7554	6.1023	-2.774	0.010768	0.26598	-2.7502	PARP11	poly(ADP-ribose) polymerase family member 11
55296	-1.9994	3.8431	-2.7735	0.01078	0.26598	-2.7511	TBC1D19	TBC1 domain family member 19
25825	-2.1775	7.2107	-2.7716	0.010827	0.26633	-2.7549	BACE2	beta-secretase 2
11277	-1.5582	10.012	-2.7715	0.01083	0.26633	-2.7551	TREX1	three prime repair exonuclease 1
83538	-1.8138	4.841	-2.7711	0.01084	0.26633	-2.7559	TTC25	tetratricopeptide repeat domain 25
3109	-2.6448	10.289	-2.7698	0.010871	0.26672	-2.7584	HLA-DMB	"major histocompatibility complex, class II, DM beta"
1407	-1.9513	6.0709	-2.7684	0.010908	0.26725	-2.7613	CRY1	cryptochrome circadian regulator 1
731223	1.6406	5.8384	2.7671	0.010939	0.2674	-2.7637	LINC01220	long intergenic non-protein coding RNA 1220
132989	1.7541	3.4333	2.7666	0.010953	0.2674	-2.7649	C4orf36	chromosome 4 open reading frame 36
10150	-2.5335	5.7353	-2.7663	0.01096	0.2674	-2.7655	MBNL2	muscleblind like splicing regulator 2
8787	-1.6764	4.0311	-2.7639	0.01102	0.26812	-2.7701	RGS9	regulator of G protein signaling 9
63893	-2.0551	9.1028	-2.7639	0.011021	0.26812	-2.7702	UBE2O	ubiquitin conjugating enzyme E2 O
8323	-1.749	2.6866	-2.7621	0.011067	0.26822	-2.7738	FZD6	frizzled class receptor 6
55552	-1.596	4.6129	-2.7617	0.011075	0.26822	-2.7744	ZNF823	zinc finger protein 823
54847	-2.0473	6.3227	-2.7615	0.011081	0.26822	-2.7749	SIDT1	SID1 transmembrane family member 1
9717	-1.4937	2.941	-2.7613	0.011087	0.26822	-2.7754	SEC14L5	SEC14 like lipid binding 5
65110	-1.5902	7.2167	-2.7587	0.011153	0.26897	-2.7805	UPF3A	UPF3A regulator of nonsense mediated mRNA decay
3002	-3.1904	10.188	-2.7586	0.011156	0.26897	-2.7807	GZMB	granzyme B
10567	1.6921	15.144	2.7582	0.011164	0.26897	-2.7814	RABAC1	Rab acceptor 1
252884	1.8821	3.9004	2.7563	0.011213	0.26977	-2.7852	ZNF396	zinc finger protein 396
150468	1.6357	3.6844	2.7553	0.011239	0.26978	-2.7872	CKAP2L	cytoskeleton associated protein 2 like
54959	1.4005	3.3637	2.7551	0.011245	0.26978	-2.7876	ODAM	"odontogenic, ameloblast associated"
2982	-1.5605	5.0304	-2.7536	0.011283	0.27032	-2.7905	GUCY1A1	guanylate cyclase 1 soluble subunit alpha 1
100129842	-1.815	8.5258	-2.7516	0.011335	0.27083	-2.7945	ZNF737	zinc finger protein 737
84519	-1.5568	9.6063	-2.7512	0.011346	0.27083	-2.7953	ACRBP	acrosin binding protein
286367	-1.582	4.1844	-2.7509	0.011353	0.27083	-2.7959	286367	NA
3565	-2.4982	3.1351	-2.7504	0.011367	0.27083	-2.7969	IL4	interleukin 4
120776	1.6287	3.1085	2.7489	0.011405	0.27138	-2.7998	OR2D2	olfactory receptor family 2 subfamily D member 2
3679	1.9651	12.087	2.7476	0.011438	0.27179	-2.8023	ITGA7	integrin subunit alpha 7
85329	-1.8796	8.9003	-2.7462	0.011476	0.2722	-2.8051	LGALS12	galectin 12
114787	1.3547	5.5662	2.7458	0.011487	0.2722	-2.806	GPRIN1	G protein regulated inducer of neurite outgrowth 1
85414	-2.2345	5.8162	-2.7446	0.011518	0.27228	-2.8083	SLC45A3	solute carrier family 45 member 3
10148	2.7865	7.0004	2.7443	0.011527	0.27228	-2.809	EBI3	Epstein-Barr virus induced 3
26253	1.8768	10.312	2.7431	0.011556	0.27228	-2.8112	CLEC4E	C-type lectin domain family 4 member E
122481	1.4577	3.2205	2.7429	0.011562	0.27228	-2.8116	AK7	adenylate kinase 7
392288	1.4817	11.743	2.7423	0.01158	0.27228	-2.8129	MAP1LC3BP1	microtubule associated protein 1 light chain 3 beta pseudogene 1
56849	1.7112	2.9545	2.7421	0.011584	0.27228	-2.8133	TCEAL7	transcription elongation factor A like 7
1432	1.7834	11.439	2.741	0.011612	0.2724	-2.8153	MAPK14	mitogen-activated protein kinase 14
163255	-1.7167	2.9807	-2.7404	0.011628	0.2724	-2.8165	ZNF540	zinc finger protein 540
22807	-1.788	6.7436	-2.739	0.011667	0.2724	-2.8194	IKZF2	IKAROS family zinc finger 2
10417	-2.7887	9.5523	-2.7385	0.01168	0.2724	-2.8204	SPON2	spondin 2
3695	-2.1734	10.203	-2.7381	0.011691	0.2724	-2.8212	ITGB7	integrin subunit beta 7
824	-2.1671	10.74	-2.738	0.011692	0.2724	-2.8213	CAPN2	calpain 2
23349	2.3515	3.4036	2.7377	0.011699	0.2724	-2.8218	PHF24	PHD finger protein 24
23456	-1.9189	6.6995	-2.7349	0.011776	0.27382	-2.8275	ABCB10	ATP binding cassette subfamily B member 10
6352	-2.7546	8.9217	-2.7312	0.011875	0.27561	-2.8347	CCL5	C-C motif chemokine ligand 5
1816	1.6661	3.9554	2.7305	0.011894	0.27561	-2.8361	DRD5	dopamine receptor D5
100505664	1.7127	3.2901	2.7303	0.011901	0.27561	-2.8366	LOC100505664	uncharacterized LOC100505664
9290	-2.0378	4.6383	-2.7293	0.011928	0.27586	-2.8385	GPR55	G protein-coupled receptor 55
9202	-1.6666	6.9646	-2.728	0.011963	0.27632	-2.8411	ZMYM4	zinc finger MYM-type containing 4
150726	-1.7161	7.8678	-2.7268	0.011995	0.27668	-2.8434	FBXO41	F-box protein 41
85478	-2.0499	2.8551	-2.7258	0.012022	0.27694	-2.8453	CCDC65	coiled-coil domain containing 65
51063	-1.9779	7.2234	-2.7242	0.012067	0.27736	-2.8485	CALHM2	calcium homeostasis modulator family member 2
4153	1.3474	2.6982	2.7239	0.012075	0.27736	-2.8491	MBL2	mannose binding lectin 2
55006	-1.8056	3.1325	-2.7234	0.012088	0.27736	-2.8501	TRMT61B	tRNA methyltransferase 61B
57194	-1.9777	6.0019	-2.721	0.012155	0.27778	-2.8548	ATP10A	ATPase phospholipid transporting 10A (putative)
159091	-1.587	5.8017	-2.7198	0.012189	0.27778	-2.8572	FAM122C	family with sequence similarity 122C
55128	-1.5973	6.0669	-2.7193	0.012203	0.27778	-2.8582	TRIM68	tripartite motif containing 68
128611	-2.7075	5.9239	-2.7191	0.012207	0.27778	-2.8585	ZNF831	zinc finger protein 831
5008	1.5852	13.704	2.719	0.012209	0.27778	-2.8586	OSM	oncostatin M
57633	2.0145	7.7085	2.7189	0.012213	0.27778	-2.8589	LRRN1	leucine rich repeat neuronal 1
3823	-2.9574	4.9343	-2.7187	0.012219	0.27778	-2.8593	KLRC3	killer cell lectin like receptor C3
8320	-3.1391	4.7897	-2.7177	0.012248	0.27807	-2.8613	EOMES	eomesodermin
55752	-2.5721	5.0995	-2.7168	0.012272	0.27827	-2.8631	SEPTIN11	septin 11
94240	-2.4233	8.6812	-2.7147	0.012332	0.27891	-2.8673	EPSTI1	epithelial stromal interaction 1
654254	-1.4482	10.773	-2.7142	0.012345	0.27891	-2.8682	ZNF732	zinc finger protein 732
401093	1.8387	3.4823	2.714	0.012349	0.27891	-2.8684	MBNL1-AS1	MBNL1 antisense RNA 1
55705	-1.9567	2.9486	-2.7126	0.012389	0.27945	-2.8712	IPO9	importin 9
347686	-2.378	3.6292	-2.7109	0.012439	0.27998	-2.8747	SNORD64	"small nucleolar RNA, C/D box 64"
254778	-1.774	2.6373	-2.7107	0.012444	0.27998	-2.8751	VXN	vexin
81631	1.3443	13.095	2.7098	0.012469	0.28017	-2.8768	MAP1LC3B	microtubule associated protein 1 light chain 3 beta
139628	1.5666	3.4122	2.7087	0.012501	0.28051	-2.879	FOXR2	forkhead box R2
27347	-2.8555	5.4719	-2.7075	0.012534	0.2806	-2.8813	STK39	serine/threonine kinase 39
84129	-2.1246	4.961	-2.707	0.012548	0.2806	-2.8822	ACAD11	acyl-CoA dehydrogenase family member 11
100130938	-1.7798	5.8626	-2.7068	0.012553	0.2806	-2.8826	100130938	NA
100506229	2.5632	7.8814	2.7058	0.012584	0.28093	-2.8847	LINC01093	long intergenic non-protein coding RNA 1093
23328	-2.2609	3.5332	-2.705	0.012606	0.28107	-2.8862	SASH1	SAM and SH3 domain containing 1
166	-2.2006	10.631	-2.7039	0.012638	0.28141	-2.8884	TLE5	"TLE family member 5, transcriptional modulator"
353345	1.7116	8.2064	2.7032	0.012658	0.28149	-2.8898	GPR141	G protein-coupled receptor 141
284459	-1.4117	5.3473	-2.7013	0.012712	0.28216	-2.8934	ZNF875	zinc finger protein 875
55326	-1.8321	4.9429	-2.701	0.01272	0.28216	-2.894	AGPAT5	1-acylglycerol-3-phosphate O-acyltransferase 5
415116	1.3198	15.714	2.6999	0.012752	0.28249	-2.8961	PIM3	"Pim-3 proto-oncogene, serine/threonine kinase"
90853	-1.9922	5.7148	-2.6992	0.012773	0.2826	-2.8976	SPOCD1	SPOC domain containing 1
116236	-2.2721	4.7183	-2.698	0.012807	0.283	-2.8999	ABHD15	abhydrolase domain containing 15
56922	-1.7863	7.9465	-2.6973	0.012827	0.283	-2.9012	MCCC1	methylcrotonoyl-CoA carboxylase 1
79626	1.2973	12.72	2.6967	0.012845	0.283	-2.9024	TNFAIP8L2	TNF alpha induced protein 8 like 2
64843	2.2708	4.2725	2.6962	0.01286	0.283	-2.9034	ISL2	ISL LIM homeobox 2
286	-2.1264	5.5178	-2.6958	0.012873	0.283	-2.9043	ANK1	ankyrin 1
121793	1.2713	5.6616	2.695	0.012895	0.28314	-2.9058	TEX29	testis expressed 29
79020	1.5653	6.9387	2.6918	0.012989	0.28429	-2.912	C7orf25	chromosome 7 open reading frame 25
100506965	-2.251	4.1463	-2.6904	0.013032	0.28429	-2.9148	PWAR6	Prader Willi/Angelman region RNA 6
6253	1.7109	8.6243	2.6901	0.013041	0.28429	-2.9154	RTN2	reticulon 2
57572	1.524	4.3768	2.69	0.013042	0.28429	-2.9155	DOCK6	dedicator of cytokinesis 6
8569	1.5055	12.388	2.6897	0.013052	0.28429	-2.9162	MKNK1	MAPK interacting serine/threonine kinase 1
100131657	1.4674	6.2815	2.6895	0.013056	0.28429	-2.9165	100131657	NA
79710	-2.002	3.8755	-2.6893	0.013064	0.28429	-2.917	MORC4	MORC family CW-type zinc finger 4
5987	1.4101	11.713	2.6888	0.013079	0.28429	-2.918	TRIM27	tripartite motif containing 27
9805	-1.7279	6.2477	-2.6866	0.013143	0.28464	-2.9221	SCRN1	secernin 1
165631	-2.1911	3.9184	-2.6864	0.013148	0.28464	-2.9225	PARP15	poly(ADP-ribose) polymerase family member 15
114908	-1.6892	12.795	-2.6862	0.013155	0.28464	-2.9229	TMEM123	transmembrane protein 123
266747	2.0533	15.218	2.686	0.01316	0.28464	-2.9233	RGL4	ral guanine nucleotide dissociation stimulator like 4
3001	-2.9582	9.5288	-2.6847	0.013199	0.28494	-2.9258	GZMA	granzyme A
9727	-1.4109	6.6354	-2.6845	0.013207	0.28494	-2.9264	RAB11FIP3	RAB11 family interacting protein 3
100873932	-1.975	5.8169	-2.6825	0.013266	0.28585	-2.9302	DPYD-AS1	DPYD antisense RNA 1
376267	-1.7362	6.3096	-2.6818	0.013287	0.28594	-2.9315	RAB15	"RAB15, member RAS oncogene family"
388	1.5936	10.745	2.6809	0.013313	0.28616	-2.9333	RHOB	ras homolog family member B
5920	-1.9888	12.113	-2.6798	0.013348	0.28654	-2.9355	PLAAT4	phospholipase A and acyltransferase 4
10588	1.6223	14.402	2.6783	0.013392	0.28701	-2.9384	MTHFS	methenyltetrahydrofolate synthetase
84671	-1.524	4.4824	-2.6777	0.013411	0.28701	-2.9395	ZNF347	zinc finger protein 347
80835	1.2745	3.7087	2.676	0.013462	0.28701	-2.9428	TAS1R1	taste 1 receptor member 1
2176	-1.6435	3.7049	-2.6756	0.013474	0.28701	-2.9436	FANCC	FA complementation group C
100130428	-1.6424	3.3389	-2.6756	0.013475	0.28701	-2.9436	100130428	NA
10636	1.4459	11.335	2.6755	0.013477	0.28701	-2.9438	RGS14	regulator of G protein signaling 14
27113	1.5941	11.905	2.6753	0.013485	0.28701	-2.9443	BBC3	BCL2 binding component 3
80833	-2.2044	5.456	-2.6711	0.013614	0.28903	-2.9525	APOL3	apolipoprotein L3
441666	-1.6627	10.621	-2.6701	0.013645	0.28903	-2.9544	LOC441666	zinc finger protein 91 pseudogene
158586	-2.3797	5.384	-2.6697	0.013656	0.28903	-2.9551	ZXDB	zinc finger X-linked duplicated B
10610	1.7369	11.337	2.6697	0.013657	0.28903	-2.9552	ST6GALNAC2	"ST6 N-acetylgalactosaminide alpha-2,6-sialyltransferase 2"
9806	-1.4848	10.651	-2.668	0.01371	0.28903	-2.9585	SPOCK2	"SPARC (osteonectin), cwcv and kazal like domains proteoglycan 2"
192134	-1.5213	3.8966	-2.6676	0.013721	0.28903	-2.9592	B3GNT6	"UDP-GlcNAc:betaGal beta-1,3-N-acetylglucosaminyltransferase 6"
127253	-1.9418	3.1652	-2.6655	0.013786	0.28903	-2.9633	TYW3	tRNA-yW synthesizing protein 3 homolog
2597	1.6437	15.062	2.6655	0.013786	0.28903	-2.9633	GAPDH	glyceraldehyde-3-phosphate dehydrogenase
8853	-1.8036	3.6767	-2.6654	0.013789	0.28903	-2.9635	ASAP2	"ArfGAP with SH3 domain, ankyrin repeat and PH domain 2"
160313	1.3173	2.6568	2.6651	0.013799	0.28903	-2.9641	KRT19P2	keratin 19 pseudogene 2
80776	1.5229	12.17	2.6649	0.013806	0.28903	-2.9645	B9D2	B9 domain containing 2
249	2.13	11.955	2.6644	0.013821	0.28903	-2.9655	ALPL	"alkaline phosphatase, biomineralization associated"
81553	1.314	12.912	2.6634	0.013851	0.28903	-2.9673	CYRIA	CYFIP related Rac1 interactor A
1662	-1.8762	5.8474	-2.6632	0.013859	0.28903	-2.9678	DDX10	DEAD-box helicase 10
286016	1.3251	12.568	2.6621	0.013894	0.28903	-2.97	TPI1P2	triosephosphate isomerase 1 pseudogene 2
283150	1.7282	4.4889	2.6614	0.013913	0.28903	-2.9712	FOXR1	forkhead box R1
100505545	1.4634	3.3594	2.6613	0.013917	0.28903	-2.9714	LINC01095	long intergenic non-protein coding RNA 1095
100130817	1.1743	3.0917	2.661	0.013929	0.28903	-2.9722	100130817	NA
79751	-1.7884	8.3403	-2.6608	0.013932	0.28903	-2.9724	SLC25A22	solute carrier family 25 member 22
955	-1.4385	7.8057	-2.6607	0.013936	0.28903	-2.9726	ENTPD6	ectonucleoside triphosphate diphosphohydrolase 6
84618	-2.3673	5.2882	-2.6606	0.01394	0.28903	-2.9728	NT5C1A	"5'-nucleotidase, cytosolic IA"
1803	-3.0061	4.7728	-2.66	0.013959	0.28903	-2.974	DPP4	dipeptidyl peptidase 4
85371	1.529	3.1684	2.6599	0.013963	0.28903	-2.9743	KIAA1656	KIAA1656 protein
7535	-2.0963	6.6708	-2.659	0.013991	0.28925	-2.976	ZAP70	zeta chain of T cell receptor associated protein kinase 70
200909	1.5406	4.1797	2.6584	0.014011	0.28933	-2.9772	HTR3D	5-hydroxytryptamine receptor 3D
23645	1.9454	12.58	2.6573	0.014043	0.28965	-2.9792	PPP1R15A	protein phosphatase 1 regulatory subunit 15A
400512	2.0694	9.1445	2.6566	0.014066	0.28977	-2.9806	NSMCE1-DT	NSMCE1 divergent transcript
3240	2.9933	13.9	2.6556	0.0141	0.28984	-2.9827	HP	haptoglobin
4935	1.7703	4.8631	2.6555	0.014103	0.28984	-2.9828	GPR143	G protein-coupled receptor 143
646396	-1.3031	7.5148	-2.6518	0.014221	0.29193	-2.99	REREP3	arginine-glutamic acid dipeptide repeats pseudogene 3
54757	2.4288	7.4675	2.6499	0.01428	0.29236	-2.9936	FAM20A	FAM20A golgi associated secretory pathway pseudokinase
9047	-1.4765	8.8876	-2.6491	0.014307	0.29236	-2.9952	SH2D2A	SH2 domain containing 2A
23259	-1.4619	5.3565	-2.6486	0.014323	0.29236	-2.9962	DDHD2	DDHD domain containing 2
1826	1.429	4.2818	2.6485	0.014326	0.29236	-2.9964	DSCAM	DS cell adhesion molecule
126003	1.4447	13.226	2.648	0.014343	0.29236	-2.9974	TRAPPC5	trafficking protein particle complex 5
127687	1.7782	12.111	2.648	0.014343	0.29236	-2.9974	C1orf122	chromosome 1 open reading frame 122
596	-1.556	7.7855	-2.6472	0.014368	0.29251	-2.9988	BCL2	BCL2 apoptosis regulator
917	-2.9808	7.7556	-2.6461	0.014403	0.29288	-3.0009	CD3G	CD3g molecule
55086	-2.0634	3.6546	-2.6455	0.014423	0.29293	-3.0021	RADX	"RPA1 related single stranded DNA binding protein, X-linked"
1244	1.7317	7.8907	2.6445	0.014456	0.29293	-3.0041	ABCC2	ATP binding cassette subfamily C member 2
643733	-2.0563	5.9422	-2.6435	0.014488	0.29293	-3.006	CASP17P	"caspase 17, pseudogene"
83888	-3.1407	5.1171	-2.6435	0.01449	0.29293	-3.0061	FGFBP2	fibroblast growth factor binding protein 2
5002	1.6364	12.561	2.6434	0.014493	0.29293	-3.0063	SLC22A18	solute carrier family 22 member 18
441172	-1.2479	4.7172	-2.643	0.014506	0.29293	-3.0071	FLJ46906	uncharacterized LOC441172
100130691	-1.6455	3.3158	-2.642	0.014537	0.29321	-3.0089	LOC100130691	uncharacterized LOC100130691
445347	-1.4602	9.2517	-2.6401	0.014599	0.29412	-3.0126	TARP	TCR gamma alternate reading frame protein
11138	1.5622	10.386	2.6393	0.014626	0.29433	-3.0142	TBC1D8	TBC1 domain family member 8
100128023	1.7472	5.349	2.6358	0.014743	0.29517	-3.021	DPPA2P3	developmental pluripotency associated 2 pseudogene 3
4094	-1.6602	8.0772	-2.635	0.014769	0.29517	-3.0225	MAF	MAF bZIP transcription factor
9046	-1.7633	7.2139	-2.6348	0.014777	0.29517	-3.023	DOK2	docking protein 2
283635	1.3102	11.485	2.6339	0.014806	0.29517	-3.0247	FAM177A1	family with sequence similarity 177 member A1
57151	1.4275	3.301	2.6335	0.014819	0.29517	-3.0254	LYZL6	lysozyme like 6
84690	-1.5229	3.9894	-2.6329	0.014838	0.29517	-3.0265	SPATA22	spermatogenesis associated 22
8848	-1.5571	8.9203	-2.6325	0.014853	0.29517	-3.0274	TSC22D1	TSC22 domain family member 1
54494	1.4812	10.268	2.6323	0.014859	0.29517	-3.0277	C11orf71	chromosome 11 open reading frame 71
27156	1.4782	8.4769	2.6323	0.014859	0.29517	-3.0278	RSPH14	radial spoke head 14 homolog
100507421	1.5924	4.0465	2.632	0.014867	0.29517	-3.0282	TMEM178B	transmembrane protein 178B
123606	-2.616	5.3736	-2.6319	0.014872	0.29517	-3.0285	NIPA1	NIPA magnesium transporter 1
3949	2.294	10.778	2.6311	0.0149	0.29517	-3.0301	LDLR	low density lipoprotein receptor
6652	-1.6226	7.4855	-2.6305	0.014919	0.29517	-3.0312	SORD	sorbitol dehydrogenase
317762	-1.3243	4.2578	-2.6302	0.01493	0.29517	-3.0318	CCDC85C	coiled-coil domain containing 85C
9452	-2.561	8.2212	-2.6299	0.014938	0.29517	-3.0323	ITM2A	integral membrane protein 2A
51280	-1.3648	6.0818	-2.6299	0.01494	0.29517	-3.0324	GOLM1	golgi membrane protein 1
203569	-2.3835	4.3747	-2.6272	0.015029	0.29658	-3.0375	PAGE2	PAGE family member 2
285381	1.3494	11.841	2.626	0.015071	0.29707	-3.0399	DPH3	diphthamide biosynthesis 3
51617	1.6827	7.3584	2.6251	0.015102	0.29734	-3.0417	NSG2	neuronal vesicle trafficking associated 2
55081	-1.3254	3.512	-2.6246	0.015119	0.29734	-3.0426	IFT57	intraflagellar transport 57
22883	-2.2164	7.2711	-2.623	0.015173	0.29789	-3.0457	CLSTN1	calsyntenin 1
84247	-2.6132	4.523	-2.6228	0.015181	0.29789	-3.0462	RTL6	retrotransposon Gag like 6
23264	-2.07	6.1086	-2.62	0.015275	0.29917	-3.0514	ZC3H7B	zinc finger CCCH-type containing 7B
8992	1.4505	14.794	2.6198	0.015281	0.29917	-3.0518	ATP6V0E1	ATPase H+ transporting V0 subunit e1
10885	-1.7421	4.9972	-2.6187	0.015322	0.29958	-3.0541	WDR3	WD repeat domain 3
8509	1.5736	10.472	2.6182	0.015336	0.29958	-3.0549	NDST2	N-deacetylase and N-sulfotransferase 2
84691	1.7001	5.1231	2.6161	0.015411	0.3007	-3.0591	FAM71F1	family with sequence similarity 71 member F1
8345	1.6748	13.611	2.615	0.015449	0.30087	-3.0612	H2BC9	H2B clustered histone 9
4837	1.9354	5.0368	2.6148	0.015454	0.30087	-3.0615	NNMT	nicotinamide N-methyltransferase
196383	1.2702	15.841	2.6132	0.015509	0.30105	-3.0645	RILPL2	Rab interacting lysosomal protein like 2
7287	1.4146	4.7444	2.6116	0.015567	0.30105	-3.0677	TULP1	TUB like protein 1
5874	-1.5828	5.5605	-2.6096	0.015636	0.30105	-3.0715	RAB27B	"RAB27B, member RAS oncogene family"
2633	-2.6007	10.162	-2.6083	0.015682	0.30105	-3.074	GBP1	guanylate binding protein 1
54221	-1.3046	2.7849	-2.6079	0.015698	0.30105	-3.0749	SNTG2	syntrophin gamma 2
100131289	-1.6733	2.8593	-2.6078	0.0157	0.30105	-3.075	LOC100131289	uncharacterized LOC100131289
147495	3.0145	5.7688	2.6074	0.015712	0.30105	-3.0757	APCDD1	APC down-regulated 1
5447	1.6311	10.933	2.6071	0.015724	0.30105	-3.0763	POR	cytochrome p450 oxidoreductase
389125	1.7051	8.7201	2.6068	0.015736	0.30105	-3.077	MUSTN1	"musculoskeletal, embryonic nuclear protein 1"
57662	1.4115	4.2958	2.6064	0.015751	0.30105	-3.0778	CAMSAP3	calmodulin regulated spectrin associated protein family member 3
51206	-1.6185	4.991	-2.606	0.015765	0.30105	-3.0785	GP6	glycoprotein VI platelet
4680	1.5404	6.9836	2.6054	0.015785	0.30105	-3.0796	CEACAM6	CEA cell adhesion molecule 6
646424	1.5984	9.2298	2.6046	0.015812	0.30105	-3.0811	SPINK8	serine peptidase inhibitor Kazal type 8 (putative)
160851	1.8858	2.9436	2.6043	0.015823	0.30105	-3.0817	DGKH	diacylglycerol kinase eta
151056	1.894	10.21	2.6041	0.015832	0.30105	-3.0822	PLB1	phospholipase B1
5095	-1.7154	5.9529	-2.6034	0.015857	0.30105	-3.0835	PCCA	propionyl-CoA carboxylase subunit alpha
150864	-1.435	7.443	-2.603	0.015871	0.30105	-3.0843	FAM117B	family with sequence similarity 117 member B
22885	-1.5962	4.5954	-2.6028	0.015876	0.30105	-3.0846	ABLIM3	actin binding LIM protein family member 3
8491	-1.8156	2.9747	-2.6026	0.015885	0.30105	-3.0851	MAP4K3	mitogen-activated protein kinase kinase kinase kinase 3
117145	-1.7663	5.399	-2.6022	0.015898	0.30105	-3.0857	THEM4	thioesterase superfamily member 4
6932	-2.1196	6.7469	-2.6018	0.015913	0.30105	-3.0865	TCF7	transcription factor 7
51099	1.5655	13.358	2.6017	0.015916	0.30105	-3.0867	ABHD5	abhydrolase domain containing 5
4747	-1.4944	5.7458	-2.6017	0.015918	0.30105	-3.0868	NEFL	neurofilament light
3429	-3.394	7.3729	-2.6013	0.015932	0.30105	-3.0876	IFI27	interferon alpha inducible protein 27
729911	1.5592	7.8298	2.6002	0.015968	0.30105	-3.0895	ANKRD34C-AS1	ANKRD34C antisense RNA 1
340205	-1.8283	5.5493	-2.5999	0.015979	0.30105	-3.0901	TREML1	triggering receptor expressed on myeloid cells like 1
79839	-1.2637	3.9693	-2.5998	0.015983	0.30105	-3.0903	CCDC102B	coiled-coil domain containing 102B
5287	-1.9814	7.1132	-2.5998	0.015984	0.30105	-3.0904	PIK3C2B	phosphatidylinositol-4-phosphate 3-kinase catalytic subunit type 2 beta
6050	-1.6868	9.2871	-2.5998	0.015985	0.30105	-3.0905	RNH1	ribonuclease/angiogenin inhibitor 1
166929	2.1229	6.8815	2.5979	0.016052	0.30105	-3.094	SGMS2	sphingomyelin synthase 2
100289424	1.3582	2.405	2.5966	0.016099	0.30105	-3.0965	100289424	NA
143689	1.4045	8.6263	2.5963	0.016109	0.30105	-3.0971	PIWIL4	piwi like RNA-mediated gene silencing 4
2323	-1.5439	6.4638	-2.5962	0.016112	0.30105	-3.0972	FLT3LG	fms related receptor tyrosine kinase 3 ligand
135644	1.2343	2.647	2.5962	0.016113	0.30105	-3.0973	TRIM40	tripartite motif containing 40
55650	1.1539	8.9206	2.5957	0.016132	0.30105	-3.0983	PIGV	phosphatidylinositol glycan anchor biosynthesis class V
6282	1.4615	15.86	2.5957	0.016132	0.30105	-3.0983	S100A11	S100 calcium binding protein A11
8825	1.7204	13.149	2.5956	0.016135	0.30105	-3.0984	LIN7A	"lin-7 homolog A, crumbs cell polarity complex component"
4774	-1.5021	4.5688	-2.5954	0.016143	0.30105	-3.0988	NFIA	nuclear factor I A
342035	1.5468	2.9918	2.5951	0.016153	0.30105	-3.0994	GLDN	gliomedin
3726	1.7214	12.42	2.5942	0.016187	0.30105	-3.1012	JUNB	"JunB proto-oncogene, AP-1 transcription factor subunit"
4778	1.6941	16.071	2.5933	0.01622	0.30105	-3.103	NFE2	"nuclear factor, erythroid 2"
388567	-1.2622	2.8185	-2.5932	0.016223	0.30105	-3.1031	ZNF749	zinc finger protein 749
1545	2.1838	11.405	2.5921	0.016261	0.30105	-3.1051	CYP1B1	cytochrome P450 family 1 subfamily B member 1
729264	1.6616	3.6847	2.5918	0.016272	0.30105	-3.1057	TP53TG3D	TP53 target 3D
387	1.3297	14.796	2.5917	0.016277	0.30105	-3.1059	RHOA	ras homolog family member A
389384	-1.7181	3.8502	-2.5915	0.016283	0.30105	-3.1063	BNIP5	BCL2 interacting protein 5
340542	-1.6323	4.8502	-2.5913	0.016292	0.30105	-3.1068	BEX5	brain expressed X-linked 5
151278	2.0408	3.2447	2.5912	0.016297	0.30105	-3.107	CCDC140	CCDC140 lncRNA
340508	-2.2844	5.5308	-2.5898	0.016346	0.30132	-3.1096	GAS2L1P2	growth arrest specific 2 like 1 pseudogene 2
645104	1.7155	6.9131	2.5895	0.016356	0.30132	-3.1101	CLRN2	clarin 2
55790	1.8853	11.811	2.5893	0.016363	0.30132	-3.1105	CSGALNACT1	chondroitin sulfate N-acetylgalactosaminyltransferase 1
7087	2.1483	6.1901	2.5864	0.01647	0.30253	-3.1161	ICAM5	intercellular adhesion molecule 5
11228	1.6181	3.8949	2.5862	0.016479	0.30253	-3.1165	RASSF8	Ras association domain family member 8
9173	2.0991	5.8105	2.5861	0.016482	0.30253	-3.1167	IL1RL1	interleukin 1 receptor like 1
57730	-1.3546	8.3241	-2.5849	0.016525	0.30301	-3.1189	ANKRD36B	ankyrin repeat domain 36B
100127994	-1.3855	2.8326	-2.5834	0.016581	0.30371	-3.1218	100127994	NA
5075	1.3564	2.6685	2.5815	0.016652	0.3047	-3.1255	PAX1	paired box 1
94030	1.6844	5.5682	2.5797	0.01672	0.30542	-3.1289	LRRC4B	leucine rich repeat containing 4B
27284	1.6845	11.496	2.5792	0.016738	0.30542	-3.1299	SULT1B1	sulfotransferase family 1B member 1
965	1.2872	11.853	2.579	0.016745	0.30542	-3.1302	CD58	CD58 molecule
81847	1.5562	10.252	2.5785	0.016765	0.30547	-3.1313	RNF146	ring finger protein 146
646482	1.4345	3.3941	2.5765	0.01684	0.30626	-3.1351	646482	NA
5828	-1.4928	4.6129	-2.5758	0.016868	0.30626	-3.1365	PEX2	peroxisomal biogenesis factor 2
140838	-1.2936	2.6572	-2.5757	0.01687	0.30626	-3.1366	NANP	N-acetylneuraminic acid phosphatase
128866	1.4241	11.541	2.5754	0.016879	0.30626	-3.1371	CHMP4B	charged multivesicular body protein 4B
374907	1.8097	13.246	2.5746	0.016912	0.30654	-3.1388	B3GNT8	"UDP-GlcNAc:betaGal beta-1,3-N-acetylglucosaminyltransferase 8"
931	-1.7893	6.5829	-2.5733	0.01696	0.30674	-3.1412	MS4A1	membrane spanning 4-domains A1
57505	-1.54	6.8424	-2.5729	0.016977	0.30674	-3.142	AARS2	"alanyl-tRNA synthetase 2, mitochondrial"
356	-2.3165	5.0304	-2.5728	0.016978	0.30674	-3.1421	FASLG	Fas ligand
401994	1.37	2.7141	2.5724	0.016994	0.30674	-3.1429	OR14I1	olfactory receptor family 14 subfamily I member 1
8013	-1.5968	6.5108	-2.5712	0.017039	0.30724	-3.1452	NR4A3	nuclear receptor subfamily 4 group A member 3
9260	1.6773	12.67	2.5704	0.017069	0.30746	-3.1467	PDLIM7	PDZ and LIM domain 7
342574	-1.7043	4.7947	-2.5685	0.017143	0.30846	-3.1504	KRT27	keratin 27
90488	-1.8168	6.7676	-2.568	0.01716	0.30846	-3.1512	TMEM263	transmembrane protein 263
1535	1.4882	14.901	2.5666	0.017217	0.30915	-3.154	CYBA	cytochrome b-245 alpha chain
100289678	-2.3229	4.912	-2.5643	0.017304	0.31039	-3.1584	ZNF783	zinc finger family member 783
51295	-1.6003	8.1352	-2.5627	0.017367	0.31107	-3.1615	ECSIT	ECSIT signaling integrator
3304	1.451	11.215	2.5624	0.017377	0.31107	-3.162	HSPA1B	heat shock protein family A (Hsp70) member 1B
133923	1.267	2.9313	2.5617	0.017405	0.31124	-3.1633	ZNF474	zinc finger protein 474
89778	1.3426	3.3487	2.5606	0.017446	0.31137	-3.1653	SERPINB11	serpin family B member 11 (gene/pseudogene)
93444	1.6098	8.083	2.5599	0.017474	0.31137	-3.1668	93444	NA
256309	1.4969	2.655	2.5595	0.017492	0.31137	-3.1676	CCDC110	coiled-coil domain containing 110
65991	-1.3542	6.667	-2.559	0.017508	0.31137	-3.1684	FUNDC2	FUN14 domain containing 2
100289045	1.4135	3.0405	2.5584	0.017532	0.31137	-3.1696	100289045	NA
1267	-1.3502	10.654	-2.5584	0.017534	0.31137	-3.1697	CNP	"2',3'-cyclic nucleotide 3' phosphodiesterase"
391518	1.512	4.0067	2.5583	0.017537	0.31137	-3.1698	VENTXP7	VENT homeobox pseudogene 7
3625	2.1538	9.4403	2.5573	0.017577	0.31175	-3.1718	INHBB	inhibin subunit beta B
6693	-2.2529	5.4853	-2.5566	0.017603	0.3119	-3.173	SPN	sialophorin
7169	-1.2795	8.0281	-2.5557	0.01764	0.31202	-3.1748	TPM2	tropomyosin 2
125972	1.3076	4.2754	2.5555	0.017646	0.31202	-3.1751	CALR3	calreticulin 3
8725	-1.8214	5.9665	-2.5539	0.017709	0.31213	-3.1782	URI1	URI1 prefoldin like chaperone
55217	1.267	8.8774	2.5532	0.017738	0.31213	-3.1796	TMLHE	"trimethyllysine hydroxylase, epsilon"
64115	1.4211	15.599	2.5527	0.017756	0.31213	-3.1804	VSIR	V-set immunoregulatory receptor
92106	-1.496	6.3677	-2.5515	0.017804	0.31213	-3.1827	OXNAD1	oxidoreductase NAD binding domain containing 1
4017	-1.5206	7.666	-2.5509	0.01783	0.31213	-3.184	LOXL2	lysyl oxidase like 2
1269	-1.4231	7.0972	-2.5507	0.017837	0.31213	-3.1843	CNR2	cannabinoid receptor 2
1161	-1.4146	4.8425	-2.5503	0.017851	0.31213	-3.185	ERCC8	"ERCC excision repair 8, CSA ubiquitin ligase complex subunit"
130367	2.4843	6.5669	2.5502	0.017854	0.31213	-3.1851	SGPP2	sphingosine-1-phosphate phosphatase 2
6391	1.3026	11.092	2.5501	0.017859	0.31213	-3.1854	SDHC	succinate dehydrogenase complex subunit C
3250	2.194	12.829	2.5488	0.017913	0.31213	-3.188	HPR	haptoglobin-related protein
80155	-1.7748	3.223	-2.5483	0.017933	0.31213	-3.1889	NAA15	"N-alpha-acetyltransferase 15, NatA auxiliary subunit"
692247	-1.2335	6.203	-2.5472	0.017976	0.31213	-3.191	LMNTD2-AS1	LMNTD2 antisense RNA 1
55825	1.7271	9.2742	2.5464	0.018008	0.31213	-3.1925	PECR	peroxisomal trans-2-enoyl-CoA reductase
27091	1.4151	3.3573	2.5462	0.018014	0.31213	-3.1928	CACNG5	calcium voltage-gated channel auxiliary subunit gamma 5
64328	-2.3232	4.5611	-2.5461	0.018019	0.31213	-3.193	XPO4	exportin 4
537	1.281	13.965	2.546	0.018022	0.31213	-3.1932	ATP6AP1	ATPase H+ transporting accessory protein 1
9882	-2.2398	4.2459	-2.5456	0.018039	0.31213	-3.1939	TBC1D4	TBC1 domain family member 4
22844	1.1802	3.1369	2.5453	0.018053	0.31213	-3.1946	FRMPD1	FERM and PDZ domain containing 1
5509	1.5577	11.435	2.5452	0.018054	0.31213	-3.1947	PPP1R3D	protein phosphatase 1 regulatory subunit 3D
10223	-2.0649	4.7693	-2.5452	0.018055	0.31213	-3.1947	GPA33	glycoprotein A33
100132948	1.5417	9.0237	2.5446	0.018078	0.31213	-3.1958	FAM27C	family with sequence similarity 27 member C
79345	1.2039	2.5601	2.5446	0.018078	0.31213	-3.1958	OR51B2	olfactory receptor family 51 subfamily B member 2 (gene/pseudogene)
283713	-1.4316	2.9653	-2.5442	0.018096	0.31213	-3.1966	283713	NA
9353	1.7667	3.4008	2.5436	0.018119	0.31213	-3.1977	SLIT2	slit guidance ligand 2
1048	1.4067	3.3206	2.5426	0.018159	0.31213	-3.1996	CEACAM5	CEA cell adhesion molecule 5
8165	-1.6726	7.3315	-2.5426	0.01816	0.31213	-3.1997	AKAP1	A-kinase anchoring protein 1
387357	-2.8908	5.7407	-2.5425	0.018164	0.31213	-3.1998	THEMIS	thymocyte selection associated
84181	-1.4934	6.0126	-2.5422	0.018177	0.31213	-3.2005	CHD6	chromodomain helicase DNA binding protein 6
6507	2.2658	6.2431	2.542	0.018183	0.31213	-3.2007	SLC1A3	solute carrier family 1 member 3
81563	-2.4493	4.6011	-2.5418	0.018192	0.31213	-3.2012	C1orf21	chromosome 1 open reading frame 21
389860	-2.2375	4.4247	-2.5404	0.018247	0.3124	-3.2038	PAGE2B	PAGE family member 2B
3993	-1.5099	8.6144	-2.5403	0.018253	0.3124	-3.204	LLGL2	LLGL scribble cell polarity complex component 2
55226	-1.6634	8.3591	-2.5399	0.018271	0.3124	-3.2049	NAT10	N-acetyltransferase 10
121260	1.4649	11.961	2.5396	0.01828	0.3124	-3.2053	SLC15A4	solute carrier family 15 member 4
53833	-1.5538	5.8096	-2.5376	0.018362	0.31349	-3.2091	IL20RB	interleukin 20 receptor subunit beta
27180	1.487	9.1282	2.5367	0.018399	0.31376	-3.2109	SIGLEC9	sialic acid binding Ig like lectin 9
201161	-1.7785	3.0003	-2.536	0.018428	0.31376	-3.2122	CENPV	centromere protein V
63943	1.3544	6.033	2.5356	0.018443	0.31376	-3.2129	FKBPL	FKBP prolyl isomerase like
11215	-1.6625	7.0855	-2.5355	0.01845	0.31376	-3.2132	AKAP11	A-kinase anchoring protein 11
5783	-2.2339	4.1674	-2.5347	0.018483	0.31384	-3.2148	PTPN13	protein tyrosine phosphatase non-receptor type 13
54832	-1.9275	8.9349	-2.5337	0.018524	0.31384	-3.2166	VPS13C	vacuolar protein sorting 13 homolog C
7746	-1.3055	5.5156	-2.5331	0.018548	0.31384	-3.2177	ZSCAN9	zinc finger and SCAN domain containing 9
80714	-1.6725	7.4307	-2.533	0.018551	0.31384	-3.2179	PBX4	PBX homeobox 4
4507	-1.4939	5.1536	-2.5328	0.01856	0.31384	-3.2183	MTAP	methylthioadenosine phosphorylase
3553	1.3564	15.121	2.5327	0.018563	0.31384	-3.2184	IL1B	interleukin 1 beta
3009	1.9633	4.6163	2.5313	0.018622	0.31451	-3.2212	H1-5	"H1.5 linker histone, cluster member"
975	-1.6598	9.2396	-2.5309	0.018639	0.31451	-3.2219	CD81	CD81 molecule
25824	1.4993	13.97	2.5298	0.018683	0.31494	-3.2239	PRDX5	peroxiredoxin 5
64108	-2.4569	9.0656	-2.529	0.018718	0.315	-3.2255	RTP4	receptor transporter protein 4
160897	-1.4568	6.2311	-2.5289	0.018723	0.315	-3.2258	GPR180	G protein-coupled receptor 180
7177	1.228	3.4292	2.5277	0.018769	0.31546	-3.2279	TPSAB1	tryptase alpha/beta 1
3841	-1.4624	3.7308	-2.5273	0.018787	0.31546	-3.2287	KPNA5	karyopherin subunit alpha 5
54963	-1.7344	6.5625	-2.5266	0.018818	0.31546	-3.2301	UCKL1	uridine-cytidine kinase 1 like 1
55905	-1.3951	9.3388	-2.5265	0.018823	0.31546	-3.2303	RNF114	ring finger protein 114
8993	2.4114	12.552	2.5257	0.018855	0.31569	-3.2317	PGLYRP1	peptidoglycan recognition protein 1
58191	1.5534	11.992	2.5244	0.018909	0.31629	-3.2342	CXCL16	C-X-C motif chemokine ligand 16
220213	1.4752	11.306	2.5235	0.018945	0.31658	-3.2358	OTUD1	OTU deubiquitinase 1
23057	1.6043	2.8408	2.5221	0.019003	0.31726	-3.2385	NMNAT2	nicotinamide nucleotide adenylyltransferase 2
9406	-1.3551	9.6509	-2.5198	0.019103	0.31814	-3.2429	ZRANB2	zinc finger RANBP2-type containing 2
57134	-1.2548	7.5235	-2.5196	0.019111	0.31814	-3.2433	MAN1C1	mannosidase alpha class 1C member 1
152789	-2.7923	4.9336	-2.5196	0.019111	0.31814	-3.2433	JAKMIP1	janus kinase and microtubule interacting protein 1
2590	1.4628	8.1067	2.5157	0.019275	0.32057	-3.2506	GALNT2	polypeptide N-acetylgalactosaminyltransferase 2
22914	-3.0574	4.6539	-2.5152	0.019298	0.32064	-3.2516	KLRK1	killer cell lectin like receptor K1
55505	1.5286	16.242	2.5134	0.019376	0.32117	-3.255	NOP10	NOP10 ribonucleoprotein
117608	-1.7929	4.2626	-2.5132	0.019385	0.32117	-3.2554	ZNF354B	zinc finger protein 354B
115	-2.5707	4.4994	-2.5131	0.019386	0.32117	-3.2555	ADCY9	adenylate cyclase 9
286135	1.2852	2.594	2.5123	0.019424	0.3212	-3.2571	LINC02209	long intergenic non-protein coding RNA 2209
23436	1.1537	2.633	2.5122	0.019425	0.3212	-3.2572	CELA3B	chymotrypsin like elastase 3B
650	2.3769	5.5716	2.5114	0.019462	0.32151	-3.2588	BMP2	bone morphogenetic protein 2
864	-1.8004	11.313	-2.5106	0.019493	0.32164	-3.2602	RUNX3	RUNX family transcription factor 3
128553	-1.642	3.1797	-2.5103	0.019507	0.32164	-3.2608	TSHZ2	teashirt zinc finger homeobox 2
1834	1.6168	3.4247	2.5089	0.01957	0.32238	-3.2635	DSPP	dentin sialophosphoprotein
57095	-1.4333	7.6526	-2.5077	0.019622	0.32292	-3.2658	PITHD1	PITH domain containing 1
8609	1.6133	10.744	2.5057	0.019706	0.324	-3.2694	KLF7	Kruppel like factor 7
64782	-1.5104	5.4325	-2.5042	0.019772	0.32428	-3.2723	AEN	apoptosis enhancing nuclease
169270	-1.2539	5.1588	-2.5039	0.019786	0.32428	-3.2729	ZNF596	zinc finger protein 596
490	-1.2807	8.5283	-2.5037	0.019793	0.32428	-3.2732	ATP2B1	ATPase plasma membrane Ca2+ transporting 1
254428	-2.1037	5.1792	-2.5033	0.019813	0.32428	-3.2741	SLC41A1	solute carrier family 41 member 1
6097	-1.9027	4.6693	-2.5027	0.019839	0.32428	-3.2752	RORC	RAR related orphan receptor C
48	-1.4884	5.9433	-2.5025	0.019848	0.32428	-3.2756	ACO1	aconitase 1
10459	1.5054	9.4183	2.502	0.019871	0.32428	-3.2766	MAD2L2	mitotic arrest deficient 2 like 2
389813	1.4929	3.0388	2.5019	0.019875	0.32428	-3.2767	AJM1	apical junction component 1 homolog
51299	2.5572	5.5148	2.5014	0.019896	0.32428	-3.2776	NRN1	neuritin 1
51284	-1.7124	5.633	-2.5011	0.01991	0.32428	-3.2782	TLR7	toll like receptor 7
92912	-1.7527	8.0243	-2.5003	0.019943	0.32452	-3.2796	UBE2Q2	ubiquitin conjugating enzyme E2 Q2
23514	1.3936	8.7137	2.4993	0.019987	0.32472	-3.2815	SPIDR	scaffold protein involved in DNA repair
2026	-1.8323	4.6543	-2.4991	0.019996	0.32472	-3.2819	ENO2	enolase 2
421	-1.5228	3.7238	-2.498	0.020047	0.32472	-3.2841	ARVCF	ARVCF delta catenin family member
925	-2.0039	9.2664	-2.4979	0.020048	0.32472	-3.2841	CD8A	CD8a molecule
389634	1.6106	7.699	2.4979	0.02005	0.32472	-3.2842	LINC00937	long intergenic non-protein coding RNA 937
219731	1.29	5.6092	2.496	0.020136	0.32582	-3.2879	PROSER2-AS1	PROSER2 antisense RNA 1
23094	-1.7035	4.0012	-2.4942	0.020216	0.32673	-3.2912	SIPA1L3	signal induced proliferation associated 1 like 3
8707	-1.7361	2.4263	-2.4927	0.020284	0.32673	-3.2941	B3GALT2	"beta-1,3-galactosyltransferase 2"
9881	-1.682	10.832	-2.4924	0.020297	0.32673	-3.2946	TRANK1	tetratricopeptide repeat and ankyrin repeat containing 1
199223	-1.4251	8.1234	-2.4923	0.0203	0.32673	-3.2948	TTC21A	tetratricopeptide repeat domain 21A
79904	-2.027	7.2659	-2.4919	0.020317	0.32673	-3.2955	79904	NA
5361	-2.4298	5.1156	-2.4908	0.020366	0.32673	-3.2975	PLXNA1	plexin A1
200159	1.3006	3.9879	2.4903	0.020389	0.32673	-3.2985	C1orf100	chromosome 1 open reading frame 100
57209	-1.4922	2.9834	-2.4902	0.020393	0.32673	-3.2987	ZNF248	zinc finger protein 248
57414	1.305	10.304	2.4901	0.020397	0.32673	-3.2988	RHBDD2	rhomboid domain containing 2
5355	1.6004	13.512	2.4901	0.020397	0.32673	-3.2988	PLP2	proteolipid protein 2
84527	-1.7008	5.4009	-2.4901	0.020399	0.32673	-3.2989	ZNF559	zinc finger protein 559
3843	-1.6833	5.3823	-2.4869	0.020544	0.32874	-3.3049	IPO5	importin 5
2615	-1.4317	4.793	-2.4861	0.02058	0.32888	-3.3065	LRRC32	leucine rich repeat containing 32
100287226	-1.2816	10.354	-2.4855	0.020606	0.32888	-3.3075	ZNF729	zinc finger protein 729
660	2.2692	10.77	2.4852	0.020621	0.32888	-3.3081	BMX	BMX non-receptor tyrosine kinase
6448	1.7485	11.599	2.4847	0.020642	0.32888	-3.309	SGSH	N-sulfoglucosamine sulfohydrolase
4061	-2.8093	9.7715	-2.4846	0.020647	0.32888	-3.3092	LY6E	lymphocyte antigen 6 family member E
3306	1.3265	6.5991	2.4836	0.020694	0.3292	-3.3112	HSPA2	heat shock protein family A (Hsp70) member 2
114881	-1.816	8.8483	-2.4833	0.020705	0.3292	-3.3116	OSBPL7	oxysterol binding protein like 7
10645	1.5808	10.194	2.4821	0.020763	0.32976	-3.314	CAMKK2	calcium/calmodulin dependent protein kinase kinase 2
5376	-1.9737	6.263	-2.4817	0.020779	0.32976	-3.3146	PMP22	peripheral myelin protein 22
23353	-1.6998	5.7883	-2.4811	0.020806	0.3299	-3.3158	SUN1	Sad1 and UNC84 domain containing 1
653316	-2.0962	4.5457	-2.4797	0.02087	0.33061	-3.3184	FAM153CP	"family with sequence similarity 153 member C, pseudogene"
8692	1.5581	12.285	2.4786	0.020922	0.33064	-3.3205	HYAL2	hyaluronidase 2
9858	-1.6359	4.0601	-2.4783	0.020935	0.33064	-3.321	PPP1R26	protein phosphatase 1 regulatory subunit 26
306	2.2324	14.817	2.4782	0.020941	0.33064	-3.3213	ANXA3	annexin A3
51474	-1.9009	5.5145	-2.477	0.020996	0.33064	-3.3235	LIMA1	LIM domain and actin binding 1
5271	1.3155	8.2907	2.4762	0.021033	0.33064	-3.325	SERPINB8	serpin family B member 8
57418	-1.7664	9.8359	-2.4761	0.021038	0.33064	-3.3252	WDR18	WD repeat domain 18
8348	1.6806	13.491	2.4759	0.021048	0.33064	-3.3256	H2BC17	H2B clustered histone 17
200185	1.236	12.427	2.4756	0.021058	0.33064	-3.326	KRTCAP2	keratinocyte associated protein 2
55347	-1.4341	2.2251	-2.4744	0.021113	0.33064	-3.3282	ABHD10	abhydrolase domain containing 10
494119	1.1657	3.7312	2.4743	0.021121	0.33064	-3.3286	SPANXN2	SPANX family member N2
8340	1.6487	14.145	2.4741	0.021128	0.33064	-3.3288	H2BC13	H2B clustered histone 13
10808	-2.1969	6.9999	-2.4738	0.021143	0.33064	-3.3294	HSPH1	heat shock protein family H (Hsp110) member 1
162966	-1.1588	7.1662	-2.4736	0.021151	0.33064	-3.3297	ZNF600	zinc finger protein 600
91	1.5011	6.7221	2.4735	0.02116	0.33064	-3.3301	ACVR1B	activin A receptor type 1B
728039	-1.4028	3.3688	-2.473	0.021181	0.33064	-3.331	SSR4P1	signal sequence receptor subunit 4 pseudogene 1
83853	1.8553	12.734	2.4728	0.02119	0.33064	-3.3313	ROPN1L	rhophilin associated tail protein 1 like
348645	-1.978	8.1849	-2.4727	0.021196	0.33064	-3.3316	C22orf34	chromosome 22 open reading frame 34
440193	-1.404	8.1721	-2.4702	0.021312	0.33184	-3.3362	CCDC88C	coiled-coil domain containing 88C
57379	1.375	4.024	2.47	0.021323	0.33184	-3.3366	AICDA	activation induced cytidine deaminase
152195	1.5009	8.7827	2.4696	0.02134	0.33184	-3.3373	NUDT16P1	nudix hydrolase 16 pseudogene 1
119587	1.1934	4.1708	2.4694	0.02135	0.33184	-3.3377	CPXM2	"carboxypeptidase X, M14 family member 2"
90827	-1.4387	7.8741	-2.4688	0.021379	0.332	-3.3389	ZNF479	zinc finger protein 479
54906	-1.5619	7.8742	-2.4675	0.02144	0.33248	-3.3413	TASOR2	transcription activation suppressor family member 2
939	-1.5538	8.9118	-2.4673	0.021448	0.33248	-3.3416	CD27	CD27 molecule
23059	-1.2591	5.9948	-2.4647	0.02157	0.33407	-3.3465	CLUAP1	clusterin associated protein 1
7162	-1.6629	5.1528	-2.4639	0.021609	0.33437	-3.348	TPBG	trophoblast glycoprotein
4923	1.8067	7.9615	2.4629	0.021654	0.33475	-3.3498	NTSR1	neurotensin receptor 1
10875	-2.5354	10.851	-2.4625	0.021676	0.33475	-3.3506	FGL2	fibrinogen like 2
80017	-1.7735	11.303	-2.4622	0.021691	0.33475	-3.3512	DGLUCY	D-glutamate cyclase
1052	1.5633	14.372	2.4617	0.021711	0.33476	-3.352	CEBPD	CCAAT enhancer binding protein delta
1299	1.7333	12.057	2.4606	0.021764	0.33509	-3.3541	COL9A3	collagen type IX alpha 3 chain
118426	1.3684	8.9127	2.4604	0.021775	0.33509	-3.3545	BORCS5	BLOC-1 related complex subunit 5
3123	-1.8968	11.58	-2.4601	0.02179	0.33509	-3.3551	HLA-DRB1	"major histocompatibility complex, class II, DR beta 1"
80184	-1.4078	6.0141	-2.4595	0.021817	0.33512	-3.3561	CEP290	centrosomal protein 290
388407	1.2711	8.1809	2.459	0.021843	0.33512	-3.3571	LINC02875	long intergenic non-protein coding RNA 2875
84148	1.3885	13.497	2.4588	0.021851	0.33512	-3.3575	KAT8	lysine acetyltransferase 8
4128	2.7295	9.0441	2.4578	0.021898	0.33525	-3.3593	MAOA	monoamine oxidase A
100130078	1.4798	8.9847	2.4577	0.021906	0.33525	-3.3596	100130078	NA
706	1.5924	17.271	2.4574	0.021917	0.33525	-3.36	TSPO	translocator protein
116092	1.2963	13.445	2.4568	0.021948	0.33543	-3.3612	DNTTIP1	deoxynucleotidyltransferase terminal interacting protein 1
441951	1.3157	15.565	2.4561	0.021982	0.33565	-3.3625	ZFAS1	ZNFX1 antisense RNA 1
126364	1.3573	13.59	2.4551	0.022029	0.33607	-3.3644	LRRC25	leucine rich repeat containing 25
57473	-1.5467	7.9417	-2.4547	0.022051	0.33611	-3.3652	ZNF512B	zinc finger protein 512B
116729	1.5623	5.8032	2.4542	0.022071	0.33613	-3.366	PPP1R27	protein phosphatase 1 regulatory subunit 27
22927	-2.2637	5.49	-2.4535	0.022108	0.33639	-3.3674	HABP4	hyaluronan binding protein 4
4068	-1.7765	5.7114	-2.4524	0.022162	0.33659	-3.3695	SH2D1A	SH2 domain containing 1A
90273	1.3442	7.5807	2.4522	0.022169	0.33659	-3.3697	CEACAM21	CEA cell adhesion molecule 21
146857	-2.089	6.8436	-2.452	0.022179	0.33659	-3.3701	SLFN13	schlafen family member 13
79745	-2.3375	6.017	-2.4514	0.022209	0.33675	-3.3713	CLIP4	CAP-Gly domain containing linker protein family member 4
10095	1.366	13.287	2.4503	0.022263	0.33727	-3.3733	ARPC1B	actin related protein 2/3 complex subunit 1B
337968	1.4288	10.721	2.4487	0.022341	0.3377	-3.3763	KRTAP6-3	keratin associated protein 6-3
245711	1.6235	4.3849	2.4483	0.02236	0.3377	-3.377	SPDYA	speedy/RINGO cell cycle regulator family member A
3655	-1.4945	8.0535	-2.4474	0.022402	0.3377	-3.3786	ITGA6	integrin subunit alpha 6
5567	-2.3944	5.674	-2.4469	0.022431	0.3377	-3.3797	PRKACB	protein kinase cAMP-activated catalytic subunit beta
3164	-2.399	4.0193	-2.4461	0.02247	0.3377	-3.3812	NR4A1	nuclear receptor subfamily 4 group A member 1
100128242	-1.4314	6.6417	-2.4458	0.022484	0.3377	-3.3817	100128242	NA
10403	-1.6673	8.0738	-2.4457	0.022488	0.3377	-3.3819	NDC80	NDC80 kinetochore complex component
9252	-2.1089	9.7638	-2.4451	0.022516	0.3377	-3.383	RPS6KA5	ribosomal protein S6 kinase A5
59277	-1.5562	3.1375	-2.4447	0.022535	0.3377	-3.3837	NTN4	netrin 4
84320	1.785	10.288	2.4444	0.022551	0.3377	-3.3843	ACBD6	acyl-CoA binding domain containing 6
390648	1.2934	3.1412	2.444	0.022571	0.3377	-3.385	OR4F6	olfactory receptor family 4 subfamily F member 6
652972	1.7216	3.4575	2.4438	0.022579	0.3377	-3.3853	LRRC37A5P	"leucine rich repeat containing 37 member A5, pseudogene"
6356	1.4025	2.8066	2.4437	0.022588	0.3377	-3.3857	CCL11	C-C motif chemokine ligand 11
7074	-2.0324	7.0749	-2.4431	0.022618	0.3377	-3.3868	TIAM1	TIAM Rac1 associated GEF 1
915	-1.9876	10.137	-2.443	0.022621	0.3377	-3.3869	CD3D	CD3d molecule
8343	1.4773	7.7173	2.4427	0.022636	0.3377	-3.3874	H2BC7	H2B clustered histone 7
147699	1.6466	10.216	2.4423	0.022654	0.3377	-3.3882	PPM1N	"protein phosphatase, Mg2+/Mn2+ dependent 1N (putative)"
55188	-1.5836	4.7227	-2.4418	0.022682	0.3377	-3.3892	RIC8B	RIC8 guanine nucleotide exchange factor B
283248	1.2399	5.7981	2.4417	0.022686	0.3377	-3.3893	RCOR2	REST corepressor 2
401474	-1.2595	3.4347	-2.4417	0.022688	0.3377	-3.3894	SAMD12	sterile alpha motif domain containing 12
203427	-1.5848	5.1694	-2.4414	0.022701	0.3377	-3.3899	SLC25A43	solute carrier family 25 member 43
83697	1.1912	5.7262	2.4398	0.022779	0.33813	-3.3928	SLC4A9	solute carrier family 4 member 9
63917	-1.1859	6.171	-2.4397	0.022784	0.33813	-3.393	GALNT11	polypeptide N-acetylgalactosaminyltransferase 11
1815	-1.1309	6.3678	-2.4396	0.022788	0.33813	-3.3931	DRD4	dopamine receptor D4
64284	1.5721	3.252	2.4388	0.022828	0.33844	-3.3946	RAB17	"RAB17, member RAS oncogene family"
114131	1.2167	7.1713	2.4382	0.022859	0.33858	-3.3958	UCN3	urocortin 3
7697	-1.2854	7.6843	-2.4379	0.022876	0.33858	-3.3964	ZNF138	zinc finger protein 138
6456	1.3581	3.2454	2.4367	0.022937	0.33918	-3.3987	SH3GL2	"SH3 domain containing GRB2 like 2, endophilin A1"
154796	-1.4602	3.5404	-2.4354	0.023001	0.33963	-3.401	AMOT	angiomotin
130940	1.7687	3.0725	2.4353	0.023006	0.33963	-3.4012	CCDC148	coiled-coil domain containing 148
128854	1.4462	4.1375	2.434	0.023071	0.3403	-3.4036	TSPY26P	"testis specific protein Y-linked 26, pseudogene"
647115	1.6422	3.8348	2.4327	0.023135	0.34067	-3.406	647115	NA
51513	-2.4342	7.7775	-2.4327	0.023135	0.34067	-3.406	ETV7	ETS variant transcription factor 7
7357	1.533	10.643	2.4317	0.023186	0.34082	-3.4079	UGCG	UDP-glucose ceramide glucosyltransferase
80781	1.7513	13.477	2.4316	0.02319	0.34082	-3.408	COL18A1	collagen type XVIII alpha 1 chain
2833	-1.276	8.6497	-2.431	0.02322	0.34082	-3.4091	CXCR3	C-X-C motif chemokine receptor 3
28966	-1.4939	6.2493	-2.4308	0.023235	0.34082	-3.4096	SNX24	sorting nexin 24
374986	-1.3713	6.596	-2.4306	0.023245	0.34082	-3.41	MIGA1	mitoguardin 1
100652883	-1.4764	3.0629	-2.4302	0.023263	0.34082	-3.4107	ALOX15P1	arachidonate 15-lipoxygenase pseudogene 1
79843	-1.8484	3.7775	-2.4296	0.023295	0.34099	-3.4118	FAM124B	family with sequence similarity 124 member B
11339	1.4771	5.8589	2.4275	0.023402	0.34226	-3.4157	OIP5	Opa interacting protein 5
26083	-1.5414	4.6347	-2.4268	0.023436	0.34248	-3.417	TBC1D29P	"TBC1 domain family member 29, pseudogene"
3363	-1.2176	6.5481	-2.4262	0.023465	0.34261	-3.418	HTR7	5-hydroxytryptamine receptor 7
145270	-1.7193	8.4287	-2.4255	0.023502	0.34287	-3.4194	PRIMA1	proline rich membrane anchor 1
50624	-1.6353	3.0784	-2.425	0.02353	0.34299	-3.4204	CUZD1	CUB and zona pellucida like domains 1
441549	-1.331	2.1036	-2.4233	0.023614	0.34369	-3.4234	CDNF	cerebral dopamine neurotrophic factor
154664	1.3446	4.7707	2.4229	0.023636	0.34369	-3.4242	ABCA13	ATP binding cassette subfamily A member 13
6347	-1.8404	6.1379	-2.4224	0.023661	0.34369	-3.4251	CCL2	C-C motif chemokine ligand 2
84672	1.2964	4.2578	2.4222	0.02367	0.34369	-3.4254	TTTY6	"testis-specific transcript, Y-linked 6"
53405	1.4947	12.572	2.4221	0.023679	0.34369	-3.4257	CLIC5	chloride intracellular channel 5
493856	-1.2954	8.0159	-2.4214	0.023713	0.34369	-3.4269	CISD2	CDGSH iron sulfur domain 2
85440	-1.365	3.5839	-2.4213	0.023717	0.34369	-3.4271	DOCK7	dedicator of cytokinesis 7
285429	1.5605	3.0262	2.4199	0.023792	0.34448	-3.4297	DCAF4L1	DDB1 and CUL4 associated factor 4 like 1
3127	-2.1479	9.7586	-2.4195	0.023815	0.34453	-3.4306	HLA-DRB5	"major histocompatibility complex, class II, DR beta 5"
79037	-2.1594	8.5351	-2.4188	0.02385	0.34475	-3.4318	PVRIG	PVR related immunoglobulin domain containing
3060	-1.4904	6.5024	-2.4174	0.023921	0.34539	-3.4343	HCRT	hypocretin neuropeptide precursor
285590	1.6235	6.1583	2.4168	0.023954	0.34539	-3.4355	SH3PXD2B	SH3 and PX domains 2B
57343	-1.2096	4.6667	-2.4168	0.023954	0.34539	-3.4355	ZNF304	zinc finger protein 304
55277	1.2844	8.2453	2.4163	0.023978	0.34545	-3.4364	FGGY	FGGY carbohydrate kinase domain containing
153443	-1.4021	6.6179	-2.4152	0.024034	0.34597	-3.4383	SRFBP1	serum response factor binding protein 1
8335	1.5457	9.1614	2.4145	0.024072	0.34613	-3.4397	H2AC4	H2A clustered histone 4
266697	1.6321	5.4975	2.4143	0.024085	0.34613	-3.4401	POM121L4P	"POM121 transmembrane nucleoporin like 4, pseudogene"
2584	1.6225	8.8292	2.4137	0.024115	0.3462	-3.4412	GALK1	galactokinase 1
100616668	-1.264	3.0073	-2.4134	0.02413	0.3462	-3.4417	TPTE2P5	transmembrane phosphoinositide 3-phosphatase and tensin homolog 2 pseudogene 5
8880	-1.2844	8.5871	-2.4126	0.024173	0.34629	-3.4432	FUBP1	far upstream element binding protein 1
3848	-2.9766	6.6206	-2.4125	0.024176	0.34629	-3.4433	KRT1	keratin 1
8336	1.8415	14.169	2.412	0.024203	0.34639	-3.4443	H2AC17	H2A clustered histone 17
3737	-1.6992	2.6227	-2.4115	0.024233	0.34651	-3.4453	KCNA2	potassium voltage-gated channel subfamily A member 2
23593	1.3904	14.404	2.4111	0.024251	0.34651	-3.446	HEBP2	heme binding protein 2
64092	1.4184	14.183	2.4095	0.024338	0.34707	-3.449	SAMSN1	"SAM domain, SH3 domain and nuclear localization signals 1"
5243	-1.6041	3.7887	-2.409	0.024361	0.34707	-3.4498	ABCB1	ATP binding cassette subfamily B member 1
5199	1.3125	15.522	2.4087	0.024379	0.34707	-3.4504	CFP	complement factor properdin
100506776	-1.5797	7.2546	-2.4086	0.024385	0.34707	-3.4506	TRG-AS1	T cell receptor gamma locus antisense RNA 1
5565	-1.9806	6.8982	-2.408	0.024415	0.34707	-3.4517	PRKAB2	protein kinase AMP-activated non-catalytic subunit beta 2
1831	1.1688	16.077	2.4072	0.02446	0.34707	-3.4532	TSC22D3	TSC22 domain family member 3
4582	1.1297	6.662	2.4065	0.024496	0.34707	-3.4545	MUC1	"mucin 1, cell surface associated"
4651	1.2111	8.364	2.4061	0.024516	0.34707	-3.4552	MYO10	myosin X
4352	-1.1033	4.7124	-2.406	0.024524	0.34707	-3.4555	MPL	"MPL proto-oncogene, thrombopoietin receptor"
92960	1.3102	6.7335	2.4059	0.024528	0.34707	-3.4556	PEX11G	peroxisomal biogenesis factor 11 gamma
10915	-1.8327	5.3781	-2.4058	0.024532	0.34707	-3.4557	TCERG1	transcription elongation regulator 1
79930	1.4049	13.723	2.4051	0.02457	0.34707	-3.457	DOK3	docking protein 3
9924	-1.403	6.7248	-2.4049	0.02458	0.34707	-3.4574	PAN2	poly(A) specific ribonuclease subunit PAN2
346157	1.5445	2.7728	2.4048	0.024586	0.34707	-3.4576	ZNF391	zinc finger protein 391
160364	2.1617	9.8339	2.4047	0.024591	0.34707	-3.4578	CLEC12A	C-type lectin domain family 12 member A
23251	-1.4528	4.8312	-2.4043	0.024612	0.3471	-3.4585	MINAR1	membrane integral NOTCH2 associated receptor 1
100129637	-1.8337	6.7275	-2.4039	0.024637	0.34716	-3.4594	100129637	NA
4811	-2.0028	4.3191	-2.4029	0.024691	0.34764	-3.4612	NID1	nidogen 1
100128511	1.6184	2.9961	2.4023	0.024721	0.34778	-3.4622	NEBL-AS1	NEBL antisense RNA 1
23648	-1.5113	8.0106	-2.4007	0.024807	0.3487	-3.4652	SSBP3	single stranded DNA binding protein 3
123283	-2.226	3.9595	-2.3996	0.024864	0.34895	-3.4671	TARS3	threonyl-tRNA synthetase 3
57157	-1.7914	7.2537	-2.3994	0.02488	0.34895	-3.4677	PHTF2	putative homeodomain transcription factor 2
10540	1.2161	11.735	2.399	0.024896	0.34895	-3.4682	DCTN2	dynactin subunit 2
440137	1.3228	4.7989	2.3989	0.024905	0.34895	-3.4685	440137	NA
10892	-1.8426	5.1322	-2.3974	0.024984	0.34977	-3.4712	MALT1	MALT1 paracaspase
962	1.3014	12.819	2.3967	0.025021	0.35001	-3.4725	CD48	CD48 molecule
9985	-1.2373	12.531	-2.3951	0.025113	0.35075	-3.4755	REC8	REC8 meiotic recombination protein
79856	-1.7801	5.7027	-2.395	0.025117	0.35075	-3.4757	SNX22	sorting nexin 22
6443	-1.7165	2.7832	-2.3945	0.025142	0.35075	-3.4765	SGCB	sarcoglycan beta
90070	1.2598	2.6988	2.3938	0.02518	0.35075	-3.4778	LACRT	lacritin
50865	-1.5415	9.8746	-2.3937	0.025188	0.35075	-3.4781	HEBP1	heme binding protein 1
3691	2.0252	8.5286	2.3936	0.025195	0.35075	-3.4783	ITGB4	integrin subunit beta 4
3148	1.4316	14.977	2.3924	0.025258	0.35102	-3.4805	HMGB2	high mobility group box 2
868	-2.0071	6.7868	-2.3921	0.025273	0.35102	-3.4809	CBLB	Cbl proto-oncogene B
153546	1.6401	8.3381	2.3921	0.025275	0.35102	-3.481	153546	NA
801	-1.4049	9.6311	-2.3914	0.025313	0.35127	-3.4823	CALM1	calmodulin 1
23626	1.1893	2.9059	2.3909	0.025342	0.35128	-3.4832	SPO11	SPO11 initiator of meiotic double stranded breaks
59338	-2.5787	5.8045	-2.3906	0.025355	0.35128	-3.4837	PLEKHA1	pleckstrin homology domain containing A1
8662	-1.3687	9.3364	-2.3886	0.025466	0.35254	-3.4874	EIF3B	eukaryotic translation initiation factor 3 subunit B
64417	-1.7457	5.5204	-2.3877	0.025519	0.3528	-3.4891	TMEM267	transmembrane protein 267
729747	-1.3832	5.9073	-2.3875	0.02553	0.3528	-3.4895	ZNF878	zinc finger protein 878
130814	-1.431	8.5867	-2.3869	0.025564	0.3528	-3.4906	SLC66A3	solute carrier family 66 member 3
9576	1.4672	2.3573	2.3866	0.025577	0.3528	-3.4911	SPAG6	sperm associated antigen 6
4254	-1.1927	3.6522	-2.3862	0.025599	0.3528	-3.4918	KITLG	KIT ligand
8120	1.9557	6.3155	2.3856	0.025633	0.3528	-3.4929	AP3B2	adaptor related protein complex 3 subunit beta 2
5768	1.5512	12.606	2.3852	0.025657	0.3528	-3.4937	QSOX1	quiescin sulfhydryl oxidase 1
100527964	1.714	9.7259	2.3848	0.02568	0.3528	-3.4945	LHX4-AS1	LHX4 antisense RNA 1
7639	-1.3927	11.832	-2.3844	0.025702	0.3528	-3.4952	ZNF85	zinc finger protein 85
26190	1.2449	8.6	2.384	0.025722	0.3528	-3.4959	FBXW2	F-box and WD repeat domain containing 2
2828	1.2694	3.2347	2.3838	0.025732	0.3528	-3.4962	GPR4	G protein-coupled receptor 4
90139	-1.0969	6.0241	-2.3837	0.025737	0.3528	-3.4964	TSPAN18	tetraspanin 18
58475	-1.7288	9.1838	-2.383	0.02578	0.3528	-3.4977	MS4A7	membrane spanning 4-domains A7
6854	1.441	7.7405	2.3826	0.0258	0.3528	-3.4984	SYN2	synapsin II
52	-1.6071	8.0749	-2.3826	0.025801	0.3528	-3.4984	ACP1	acid phosphatase 1
64231	1.5618	11.92	2.3824	0.02581	0.3528	-3.4987	MS4A6A	membrane spanning 4-domains A6A
1741	-2.4268	4.4721	-2.3814	0.025865	0.35328	-3.5006	DLG3	discs large MAGUK scaffold protein 3
253152	-1.6483	4.354	-2.381	0.025892	0.35336	-3.5014	EPHX4	epoxide hydrolase 4
22899	-1.1962	11.708	-2.3801	0.02594	0.35344	-3.503	ARHGEF15	Rho guanine nucleotide exchange factor 15
4063	-1.28	7.8625	-2.3799	0.025954	0.35344	-3.5034	LY9	lymphocyte antigen 9
81626	1.546	2.4114	2.3792	0.02599	0.35344	-3.5046	SHCBP1L	SHC binding and spindle associated 1 like
7141	1.3184	2.8372	2.3788	0.026016	0.35344	-3.5055	TNP1	transition protein 1
124602	-1.3638	6.2554	-2.3784	0.026034	0.35344	-3.506	KIF19	kinesin family member 19
29097	1.4839	13.758	2.3783	0.026042	0.35344	-3.5063	CNIH4	cornichon family AMPA receptor auxiliary protein 4
23762	-1.7526	4.8078	-2.3778	0.02607	0.35344	-3.5072	OSBP2	oxysterol binding protein 2
10090	-1.4367	3.6808	-2.3778	0.02607	0.35344	-3.5072	UST	uronyl 2-sulfotransferase
7768	-1.1184	5.6519	-2.3776	0.026081	0.35344	-3.5076	ZNF225	zinc finger protein 225
25886	1.3311	7.7854	2.3766	0.026136	0.35356	-3.5094	POC1A	POC1 centriolar protein A
440799	1.3044	3.2729	2.3759	0.026176	0.35356	-3.5107	P2RX6P	purinergic receptor P2X 6 pseudogene
54472	1.4999	12.468	2.3758	0.026182	0.35356	-3.5108	TOLLIP	toll interacting protein
55020	-1.0608	8.0802	-2.3758	0.026183	0.35356	-3.5109	TTC38	tetratricopeptide repeat domain 38
79899	-2.1739	6.8805	-2.3756	0.026196	0.35356	-3.5113	PRR5L	proline rich 5 like
51752	-1.3902	8.2902	-2.3748	0.026239	0.35356	-3.5127	ERAP1	endoplasmic reticulum aminopeptidase 1
203	-1.3188	7.607	-2.3743	0.026266	0.35356	-3.5136	AK1	adenylate kinase 1
100216479	1.2123	6.2233	2.3741	0.026279	0.35356	-3.514	FAR2P2	fatty acyl-CoA reductase 2 pseudogene 2
79149	-1.2331	4.826	-2.3739	0.026291	0.35356	-3.5144	ZSCAN5A	zinc finger and SCAN domain containing 5A
2783	1.4198	12.788	2.3737	0.026303	0.35356	-3.5147	GNB2	G protein subunit beta 2
26996	1.4084	12.659	2.3733	0.026322	0.35356	-3.5154	GPR160	G protein-coupled receptor 160
94163	-1.1991	7.0767	-2.3725	0.026373	0.35356	-3.517	SNORD38B	"small nucleolar RNA, C/D box 38B"
7404	-1.9175	7.4501	-2.3724	0.026378	0.35356	-3.5172	UTY	"ubiquitously transcribed tetratricopeptide repeat containing, Y-linked"
119369	-1.7933	2.7995	-2.3714	0.026431	0.35356	-3.5189	NUDT9P1	nudix hydrolase 9 pseudogene 1
159090	-1.4144	7.9297	-2.3714	0.026432	0.35356	-3.5189	FAM122B	family with sequence similarity 122B
284576	1.4971	3.757	2.3706	0.026481	0.35356	-3.5205	LEMD1-AS1	LEMD1 antisense RNA 1
84504	1.1969	4.8047	2.3704	0.026492	0.35356	-3.5208	NKX6-2	NK6 homeobox 2
57508	-1.6595	3.2755	-2.3704	0.026493	0.35356	-3.5208	INTS2	integrator complex subunit 2
10409	1.7531	16.564	2.3701	0.02651	0.35356	-3.5214	BASP1	brain abundant membrane attached signal protein 1
64770	-1.5748	7.1838	-2.3698	0.026527	0.35356	-3.5219	CCDC14	coiled-coil domain containing 14
347735	1.1796	5.6956	2.3694	0.026546	0.35356	-3.5225	SERINC2	serine incorporator 2
149473	1.2042	3.3602	2.3691	0.026565	0.35356	-3.5231	CCDC24	coiled-coil domain containing 24
117283	1.6854	8.7903	2.3689	0.026576	0.35356	-3.5235	IP6K3	inositol hexakisphosphate kinase 3
1357	1.1612	2.8643	2.3689	0.026579	0.35356	-3.5236	CPA1	carboxypeptidase A1
100506810	1.5312	3.9701	2.3682	0.026615	0.35357	-3.5247	LINC01132	long intergenic non-protein coding RNA 1132
11226	-1.7207	6.6706	-2.3675	0.026659	0.35357	-3.5261	GALNT6	polypeptide N-acetylgalactosaminyltransferase 6
79652	-1.4284	7.2174	-2.3673	0.026668	0.35357	-3.5264	TMEM204	transmembrane protein 204
7494	1.5811	13.007	2.367	0.026686	0.35357	-3.527	XBP1	X-box binding protein 1
80264	-1.4395	7.5611	-2.3656	0.026769	0.35357	-3.5296	ZNF430	zinc finger protein 430
55062	1.4089	12.709	2.3655	0.026772	0.35357	-3.5297	WIPI1	"WD repeat domain, phosphoinositide interacting 1"
83448	-1.2427	3.0683	-2.3652	0.026788	0.35357	-3.5302	PUS7L	pseudouridine synthase 7 like
56729	2.3652	11.256	2.3652	0.026789	0.35357	-3.5302	RETN	resistin
684	-1.6798	11.489	-2.365	0.026801	0.35357	-3.5306	BST2	bone marrow stromal cell antigen 2
81552	1.3703	12.315	2.3648	0.026812	0.35357	-3.531	VOPP1	VOPP1 WW domain binding protein
932	1.5405	5.545	2.3637	0.026874	0.35357	-3.5329	MS4A3	membrane spanning 4-domains A3
51128	1.4162	9.284	2.3636	0.02688	0.35357	-3.5331	SAR1B	secretion associated Ras related GTPase 1B
51101	-1.4428	5.4399	-2.3635	0.026886	0.35357	-3.5333	ZC2HC1A	zinc finger C2HC-type containing 1A
729522	1.2314	3.6469	2.3634	0.026894	0.35357	-3.5335	AACSP1	acetoacetyl-CoA synthetase pseudogene 1
6283	1.6328	17.218	2.3626	0.026938	0.35357	-3.5349	S100A12	S100 calcium binding protein A12
30815	-1.6638	5.666	-2.3622	0.026964	0.35357	-3.5357	ST6GALNAC6	"ST6 N-acetylgalactosaminide alpha-2,6-sialyltransferase 6"
57713	-1.2335	4.6616	-2.3615	0.027003	0.35357	-3.5369	SFMBT2	Scm like with four mbt domains 2
170689	1.1864	3.7719	2.3612	0.027024	0.35357	-3.5376	ADAMTS15	ADAM metallopeptidase with thrombospondin type 1 motif 15
6541	-2.3426	4.8814	-2.3607	0.027051	0.35357	-3.5384	SLC7A1	solute carrier family 7 member 1
80339	1.2814	4.98	2.3601	0.027084	0.35357	-3.5395	PNPLA3	patatin like phospholipase domain containing 3
8518	-1.3739	4.4444	-2.36	0.027091	0.35357	-3.5397	ELP1	elongator complex protein 1
84843	-1.3534	4.6193	-2.3598	0.027103	0.35357	-3.5401	84843	NA
84529	-1.5009	4.9074	-2.3598	0.027103	0.35357	-3.5401	C15orf41	chromosome 15 open reading frame 41
55508	1.2671	9.5569	2.3592	0.027139	0.35357	-3.5412	SLC35E3	solute carrier family 35 member E3
51729	-1.2681	9.7201	-2.3592	0.027141	0.35357	-3.5413	WBP11	WW domain binding protein 11
84282	1.2139	12.936	2.3588	0.027161	0.35357	-3.5419	RNF135	ring finger protein 135
51177	-1.3171	13.199	-2.3588	0.027163	0.35357	-3.5419	PLEKHO1	pleckstrin homology domain containing O1
115361	-1.6942	10.963	-2.3585	0.027177	0.35357	-3.5424	GBP4	guanylate binding protein 4
25822	1.2201	7.4034	2.3585	0.027181	0.35357	-3.5425	DNAJB5	DnaJ heat shock protein family (Hsp40) member B5
1406	1.4136	7.4279	2.3581	0.027202	0.35357	-3.5431	CRX	cone-rod homeobox
26499	-2.8245	2.8672	-2.3579	0.027215	0.35357	-3.5435	PLEK2	pleckstrin 2
7097	1.3232	15.714	2.3576	0.027232	0.35357	-3.5441	TLR2	toll like receptor 2
225	-1.5461	2.6115	-2.3564	0.027305	0.35376	-3.5463	ABCD2	ATP binding cassette subfamily D member 2
3640	1.4734	12.089	2.3562	0.027313	0.35376	-3.5466	INSL3	insulin like 3
5836	1.4436	15.584	2.3561	0.02732	0.35376	-3.5468	PYGL	glycogen phosphorylase L
22877	1.4416	11.351	2.3558	0.027337	0.35376	-3.5473	MLXIP	MLX interacting protein
84815	2.1129	5.4363	2.355	0.027384	0.35376	-3.5488	MGC12916	uncharacterized protein MGC12916
246126	-2.0174	5.3334	-2.3541	0.027438	0.35376	-3.5505	TXLNGY	"taxilin gamma pseudogene, Y-linked"
54512	1.801	11.241	2.354	0.027443	0.35376	-3.5506	EXOSC4	exosome component 4
9249	-1.6283	7.0068	-2.3538	0.027455	0.35376	-3.551	DHRS3	dehydrogenase/reductase 3
100506023	1.1846	9.3228	2.3532	0.027495	0.35376	-3.5522	LOC100506023	uncharacterized LOC100506023
1618	1.5047	3.0157	2.3531	0.027498	0.35376	-3.5523	DAZL	deleted in azoospermia like
339327	-1.1868	5.7541	-2.3529	0.02751	0.35376	-3.5527	ZNF546	zinc finger protein 546
146712	1.2381	8.7239	2.3527	0.027522	0.35376	-3.553	B3GNTL1	"UDP-GlcNAc:betaGal beta-1,3-N-acetylglucosaminyltransferase like 1"
10542	1.3998	14.593	2.3524	0.027542	0.35376	-3.5537	LAMTOR5	"late endosomal/lysosomal adaptor, MAPK and MTOR activator 5"
100128276	1.4399	11.101	2.3522	0.027553	0.35376	-3.554	LOC100128276	uncharacterized LOC100128276
8359	1.2373	8.1874	2.3522	0.027553	0.35376	-3.554	H4C1	H4 clustered histone 1
26039	-1.7541	6.6759	-2.3515	0.027593	0.35387	-3.5552	SS18L1	SS18L1 subunit of BAF chromatin remodeling complex
51667	-1.3412	10.28	-2.351	0.027622	0.35387	-3.5561	NUB1	negative regulator of ubiquitin like proteins 1
23541	-1.1647	4.3538	-2.3503	0.027662	0.35387	-3.5573	SEC14L2	SEC14 like lipid binding 2
5226	1.5366	13.764	2.3498	0.027696	0.35387	-3.5584	PGD	phosphogluconate dehydrogenase
80055	-1.3157	4.8227	-2.3497	0.027702	0.35387	-3.5585	PGAP1	post-GPI attachment to proteins inositol deacylase 1
3017	1.5763	12.201	2.3497	0.027703	0.35387	-3.5586	H2BC5	H2B clustered histone 5
84786	-1.5523	7.4337	-2.3496	0.027704	0.35387	-3.5586	84786	NA
7748	-1.338	7.6453	-2.3491	0.027736	0.3539	-3.5596	ZNF195	zinc finger protein 195
26152	-1.682	5.0705	-2.3488	0.027753	0.3539	-3.5601	ZNF337	zinc finger protein 337
622	-1.7522	5.1928	-2.3486	0.027767	0.3539	-3.5605	BDH1	3-hydroxybutyrate dehydrogenase 1
56341	1.1983	2.9835	2.3478	0.027814	0.35409	-3.562	PRMT8	protein arginine methyltransferase 8
142940	-2.3604	3.8936	-2.3476	0.027828	0.35409	-3.5624	TRUB1	TruB pseudouridine synthase family member 1
129852	1.7155	3.1098	2.3473	0.027844	0.35409	-3.5628	C2orf73	chromosome 2 open reading frame 73
375757	1.2055	8.2625	2.3464	0.027897	0.35424	-3.5645	SWI5	SWI5 homologous recombination repair protein
5184	-1.9059	8.4643	-2.3461	0.027914	0.35424	-3.565	PEPD	peptidase D
3115	-2.3228	9.6478	-2.3458	0.027935	0.35424	-3.5656	HLA-DPB1	"major histocompatibility complex, class II, DP beta 1"
84793	1.2755	4.7756	2.3456	0.027947	0.35424	-3.566	FOXD2-AS1	FOXD2 adjacent opposite strand RNA 1
55906	-1.4964	5.611	-2.3451	0.027975	0.35424	-3.5668	ZC4H2	zinc finger C4H2-type containing
158046	1.0829	5.7605	2.3451	0.027978	0.35424	-3.5669	NXNL2	nucleoredoxin like 2
54432	1.2079	12.555	2.3442	0.028029	0.35462	-3.5684	YIPF1	Yip1 domain family member 1
285016	-1.2012	3.0765	-2.3438	0.028053	0.35467	-3.5692	ALKAL2	ALK and LTK ligand 2
168374	-1.5534	7.7844	-2.343	0.028104	0.35506	-3.5707	ZNF92	zinc finger protein 92
6449	1.281	12.872	2.3416	0.028185	0.35525	-3.5731	SGTA	small glutamine rich tetratricopeptide repeat containing alpha
10529	1.3696	4.7409	2.3411	0.028216	0.35525	-3.5741	NEBL	nebulette
545	-1.3786	7.6389	-2.3408	0.028239	0.35525	-3.5747	ATR	ATR serine/threonine kinase
64114	1.0721	11.497	2.3407	0.028242	0.35525	-3.5748	TMBIM1	transmembrane BAX inhibitor motif containing 1
4835	1.588	12.12	2.3401	0.02828	0.35525	-3.576	NQO2	N-ribosyldihydronicotinamide:quinone reductase 2
4267	-1.6845	7.8238	-2.3398	0.028294	0.35525	-3.5764	CD99	CD99 molecule (Xg blood group)
6638	-2.4157	8.0384	-2.3398	0.028298	0.35525	-3.5765	SNRPN	small nuclear ribonucleoprotein polypeptide N
58528	1.2994	10.57	2.3395	0.028316	0.35525	-3.577	RRAGD	Ras related GTP binding D
84912	-1.7371	3.846	-2.3394	0.028321	0.35525	-3.5772	SLC35B4	solute carrier family 35 member B4
55711	1.3788	9.2451	2.3391	0.028339	0.35525	-3.5777	FAR2	fatty acyl-CoA reductase 2
439949	-2.0478	7.3986	-2.3387	0.028364	0.35525	-3.5785	PRKCQ-AS1	PRKCQ antisense RNA 1
5998	1.1544	10.585	2.3387	0.028365	0.35525	-3.5785	RGS3	regulator of G protein signaling 3
100507445	-1.2347	5.4561	-2.3378	0.028419	0.35551	-3.5801	100507445	NA
26119	-2.2264	4.0652	-2.3371	0.02846	0.35551	-3.5813	LDLRAP1	low density lipoprotein receptor adaptor protein 1
441864	1.247	4.6656	2.3368	0.02848	0.35551	-3.5819	TARM1	"T cell-interacting, activating receptor on myeloid cells 1"
8821	-1.5389	4.2278	-2.3362	0.028518	0.35551	-3.583	INPP4B	inositol polyphosphate-4-phosphatase type II B
401074	1.1426	7.5071	2.336	0.028528	0.35551	-3.5833	LINC00960	long intergenic non-protein coding RNA 960
147807	1.3868	11.131	2.3357	0.028548	0.35551	-3.5839	ZNF524	zinc finger protein 524
64207	1.3087	9.349	2.3355	0.028561	0.35551	-3.5843	IRF2BPL	interferon regulatory factor 2 binding protein like
1050	1.5663	11.509	2.3354	0.028568	0.35551	-3.5845	CEBPA	CCAAT enhancer binding protein alpha
10406	1.7066	10.044	2.3349	0.028598	0.35551	-3.5854	WFDC2	WAP four-disulfide core domain 2
196472	1.3964	3.3752	2.3346	0.028612	0.35551	-3.5858	FAM71C	family with sequence similarity 71 member C
340526	-1.3009	5.5163	-2.3345	0.02862	0.35551	-3.586	RTL5	retrotransposon Gag like 5
8030	-1.6704	7.5855	-2.334	0.02865	0.35551	-3.5869	CCDC6	coiled-coil domain containing 6
56992	1.4736	4.7574	2.334	0.028652	0.35551	-3.587	KIF15	kinesin family member 15
284759	1.2098	8.9155	2.3331	0.028709	0.35596	-3.5887	SIRPB2	signal regulatory protein beta 2
978	1.7075	13.469	2.3327	0.028732	0.35599	-3.5893	CDA	cytidine deaminase
84698	-1.5381	2.6094	-2.332	0.028774	0.35612	-3.5906	CAPS2	calcyphosine 2
3018	1.4695	11.469	2.3314	0.028809	0.35612	-3.5916	H2BC3	H2B clustered histone 3
401589	1.2997	3.439	2.3313	0.028821	0.35612	-3.5919	LOC401589	uncharacterized LOC401589
23111	-1.5022	5.463	-2.3312	0.028825	0.35612	-3.5921	SPART	spartin
10952	1.3201	13.978	2.3296	0.028923	0.35686	-3.5949	SEC61B	SEC61 translocon subunit beta
9577	1.1051	9.133	2.3296	0.028926	0.35686	-3.595	BABAM2	BRISC and BRCA1 A complex member 2
55858	1.0642	10.53	2.3279	0.029032	0.35784	-3.5981	TMEM165	transmembrane protein 165
23641	-1.8579	5.2272	-2.3273	0.029069	0.35784	-3.5992	LDOC1	LDOC1 regulator of NFKB signaling
23416	1.746	15.141	2.3263	0.02913	0.35784	-3.6009	KCNH3	potassium voltage-gated channel subfamily H member 3
3696	-1.4326	2.6331	-2.3262	0.029138	0.35784	-3.6012	ITGB8	integrin subunit beta 8
7045	-2.2901	9.6081	-2.326	0.029148	0.35784	-3.6014	TGFBI	transforming growth factor beta induced
246777	1.3718	3.9157	2.3258	0.029162	0.35784	-3.6019	SPESP1	sperm equatorial segment protein 1
10461	2.2439	6.0976	2.3257	0.029166	0.35784	-3.602	MERTK	"MER proto-oncogene, tyrosine kinase"
152024	-1.7147	5.3808	-2.3256	0.02917	0.35784	-3.6021	LINC00691	long intergenic non-protein coding RNA 691
119	-1.3877	4.2387	-2.3246	0.029234	0.35817	-3.6039	ADD2	adducin 2
8417	1.1413	10.871	2.3246	0.029238	0.35817	-3.6041	STX7	syntaxin 7
153339	1.1474	11.365	2.3232	0.029324	0.35896	-3.6065	TMEM167A	transmembrane protein 167A
25911	-1.6584	6.8592	-2.3205	0.029492	0.36033	-3.6114	DPCD	deleted in primary ciliary dyskinesia homolog (mouse)
9910	-1.426	9.3627	-2.3199	0.029533	0.36033	-3.6125	RABGAP1L	RAB GTPase activating protein 1 like
54941	-2.0218	7.6415	-2.3194	0.029563	0.36033	-3.6134	RNF125	ring finger protein 125
647310	1.3094	3.6568	2.319	0.029588	0.36033	-3.6141	TEX22	testis expressed 22
1645	2.0165	6.3992	2.3189	0.029595	0.36033	-3.6143	AKR1C1	aldo-keto reductase family 1 member C1
256144	-1.4578	6.0276	-2.3189	0.029597	0.36033	-3.6143	OR4C3	olfactory receptor family 4 subfamily C member 3
5739	-1.6232	6.2917	-2.3187	0.029611	0.36033	-3.6147	PTGIR	prostaglandin I2 receptor
641649	1.4253	11.78	2.3185	0.029619	0.36033	-3.615	TMEM91	transmembrane protein 91
286076	-1.3879	4.1769	-2.3185	0.029622	0.36033	-3.6151	LINC02878	long intergenic non-protein coding RNA 2878
171389	1.5913	7.6105	2.3177	0.029674	0.3607	-3.6165	NLRP6	NLR family pyrin domain containing 6
375190	1.2914	9.9834	2.3161	0.029775	0.36078	-3.6194	FAM228B	family with sequence similarity 228 member B
100127972	-1.4096	3.02	-2.316	0.02978	0.36078	-3.6195	100127972	NA
9913	-1.3063	8.7643	-2.3159	0.029787	0.36078	-3.6197	SUPT7L	"SPT7 like, STAGA complex subunit gamma"
8969	1.7333	6.1217	2.3157	0.029799	0.36078	-3.6201	H2AC11	H2A clustered histone 11
56203	1.1737	2.8025	2.3156	0.029802	0.36078	-3.6202	LMOD3	leiomodin 3
151760	1.4382	4.1828	2.3155	0.029813	0.36078	-3.6205	LOC151760	putative uncharacterized protein LOC151760
285971	1.1846	9.0345	2.3152	0.029831	0.36078	-3.621	ZNF775	zinc finger protein 775
55600	-2.5397	5.1368	-2.3149	0.029847	0.36078	-3.6214	ITLN1	intelectin 1
5273	1.1772	3.4935	2.3134	0.029945	0.36147	-3.6242	SERPINB10	serpin family B member 10
57655	1.4608	8.9043	2.3132	0.029958	0.36147	-3.6246	GRAMD1A	GRAM domain containing 1A
25976	1.3279	10.627	2.313	0.029974	0.36147	-3.625	TIPARP	TCDD inducible poly(ADP-ribose) polymerase
4642	-1.8287	2.8888	-2.3124	0.030007	0.36147	-3.6259	MYO1D	myosin ID
58485	1.2542	13.154	2.3121	0.030031	0.36147	-3.6266	TRAPPC1	trafficking protein particle complex 1
84809	-1.4575	9.6421	-2.3114	0.030073	0.36147	-3.6278	CROCCP2	CROCC pseudogene 2
54487	-0.97342	7.1834	-2.3113	0.030079	0.36147	-3.6279	DGCR8	DGCR8 microprocessor complex subunit
79908	1.5966	11.902	2.3111	0.030091	0.36147	-3.6283	BTNL8	butyrophilin like 8
3554	1.65	8.813	2.3111	0.030093	0.36147	-3.6283	IL1R1	interleukin 1 receptor type 1
3162	1.6964	11.694	2.3108	0.030112	0.36147	-3.6289	HMOX1	heme oxygenase 1
100132963	1.337	4.7179	2.3098	0.030179	0.36203	-3.6307	SMIM9	small integral membrane protein 9
391	1.3638	13.355	2.3094	0.030202	0.36205	-3.6314	RHOG	ras homolog family member G
140465	1.3251	7.7972	2.3088	0.030242	0.36209	-3.6325	MYL6B	myosin light chain 6B
23333	-1.6439	4.5741	-2.3085	0.030261	0.36209	-3.633	DPY19L1	dpy-19 like C-mannosyltransferase 1
653160	-1.5832	4.099	-2.3083	0.030274	0.36209	-3.6334	LOC653160	uncharacterized LOC653160
3988	-1.9903	8.9101	-2.3078	0.030308	0.36209	-3.6343	LIPA	"lipase A, lysosomal acid type"
80731	-1.6687	4.5047	-2.3072	0.030345	0.36209	-3.6354	THSD7B	thrombospondin type 1 domain containing 7B
8723	-1.1645	7.5395	-2.3071	0.030352	0.36209	-3.6356	SNX4	sorting nexin 4
116933	1.2095	10.763	2.3069	0.030362	0.36209	-3.6358	CLRN1-AS1	CLRN1 antisense RNA 1
647087	-1.5439	8.7056	-2.3068	0.030372	0.36209	-3.6361	STMP1	short transmembrane mitochondrial protein 1
23052	-1.6966	8.095	-2.3061	0.030416	0.36236	-3.6373	ENDOD1	endonuclease domain containing 1
90075	-1.5769	3.5945	-2.3051	0.030483	0.3629	-3.6392	ZNF30	zinc finger protein 30
201633	-1.6304	5.3678	-2.3046	0.030511	0.36292	-3.64	TIGIT	T cell immunoreceptor with Ig and ITIM domains
5594	1.2458	13.434	2.3044	0.030526	0.36292	-3.6404	MAPK1	mitogen-activated protein kinase 1
79727	-1.2087	3.27	-2.3035	0.030587	0.36323	-3.642	LIN28A	lin-28 homolog A
23244	1.721	12.521	2.3032	0.030604	0.36323	-3.6425	PDS5A	PDS5 cohesin associated factor A
124936	1.1406	7.4248	2.3031	0.030614	0.36323	-3.6428	CYB5D2	cytochrome b5 domain containing 2
57110	-1.6148	3.5635	-2.3019	0.030692	0.36382	-3.6449	PLAAT1	phospholipase A and acyltransferase 1
6689	-1.5664	7.2233	-2.3013	0.030727	0.36382	-3.6459	SPIB	Spi-B transcription factor
23014	-1.507	7.3563	-2.3013	0.030727	0.36382	-3.6459	FBXO21	F-box protein 21
57683	-1.6718	3.6888	-2.3006	0.030777	0.36395	-3.6472	ZDBF2	zinc finger DBF-type containing 2
84131	-2.0926	5.4332	-2.3003	0.030795	0.36395	-3.6477	CEP78	centrosomal protein 78
93594	-1.5361	5.0221	-2.3	0.030812	0.36395	-3.6482	TBC1D31	TBC1 domain family member 31
389376	-1.2772	4.2883	-2.2997	0.030834	0.36395	-3.6488	SFTA2	surfactant associated 2
54877	-1.9459	10.635	-2.2996	0.030843	0.36395	-3.6491	ZCCHC2	zinc finger CCHC-type containing 2
8604	1.4401	9.0473	2.2987	0.030899	0.36428	-3.6506	SLC25A12	solute carrier family 25 member 12
284323	1.2257	6.593	2.2983	0.030926	0.36428	-3.6513	ZNF780A	zinc finger protein 780A
338773	1.8635	8.6678	2.2982	0.030935	0.36428	-3.6516	TMEM119	transmembrane protein 119
126231	-1.9065	6.1394	-2.2979	0.030955	0.36428	-3.6521	ZNF573	zinc finger protein 573
163778	1.2107	2.7039	2.2972	0.030999	0.36443	-3.6533	SPRR4	small proline rich protein 4
1033	1.4116	6.2186	2.2968	0.031027	0.36443	-3.654	CDKN3	cyclin dependent kinase inhibitor 3
23630	1.248	9.1752	2.2962	0.031069	0.36443	-3.6552	KCNE5	potassium voltage-gated channel subfamily E regulatory subunit 5
23199	-1.5927	7.6269	-2.2959	0.031088	0.36443	-3.6557	GSE1	Gse1 coiled-coil protein
349152	-1.4899	2.4516	-2.2957	0.031097	0.36443	-3.656	DPY19L2P2	DPY19L2 pseudogene 2
1101	1.1735	5.5697	2.2955	0.031113	0.36443	-3.6564	CHAD	chondroadherin
3131	-1.4983	3.2058	-2.2955	0.031115	0.36443	-3.6564	HLF	"HLF transcription factor, PAR bZIP family member"
49861	1.5415	2.897	2.2949	0.031152	0.36455	-3.6574	CLDN20	claudin 20
138715	1.1198	4.6139	2.2947	0.031167	0.36455	-3.6578	ARID3C	AT-rich interaction domain 3C
284751	1.8711	9.7013	2.2943	0.031194	0.36461	-3.6586	LINC01270	long intergenic non-protein coding RNA 1270
51727	-1.4585	7.7247	-2.2936	0.031241	0.3648	-3.6598	CMPK1	cytidine/uridine monophosphate kinase 1
10447	-1.7364	4.6996	-2.2929	0.031284	0.3648	-3.661	FAM3C	FAM3 metabolism regulating signaling molecule C
10555	1.4166	13.771	2.2927	0.031301	0.3648	-3.6614	AGPAT2	1-acylglycerol-3-phosphate O-acyltransferase 2
256957	-1.6159	3.4699	-2.2927	0.031302	0.3648	-3.6615	HEATR9	HEAT repeat containing 9
23327	-1.1532	4.8633	-2.2918	0.03136	0.3648	-3.663	NEDD4L	NEDD4 like E3 ubiquitin protein ligase
7082	1.4934	2.4007	2.2916	0.031372	0.3648	-3.6633	TJP1	tight junction protein 1
146198	-1.4537	7.6768	-2.2914	0.031384	0.3648	-3.6637	ZFP90	ZFP90 zinc finger protein
9711	-1.3314	10.297	-2.2914	0.031389	0.3648	-3.6638	RUBCN	rubicon autophagy regulator
145853	-1.6578	7.5032	-2.2909	0.03142	0.3648	-3.6646	C15orf61	chromosome 15 open reading frame 61
79625	1.3329	3.8921	2.2907	0.031433	0.3648	-3.665	NDNF	neuron derived neurotrophic factor
4318	2.3198	16.307	2.2904	0.031453	0.3648	-3.6655	MMP9	matrix metallopeptidase 9
58526	1.3645	14.197	2.2902	0.031469	0.3648	-3.6659	MID1IP1	MID1 interacting protein 1
196513	-1.5655	6.7641	-2.2899	0.031483	0.3648	-3.6663	DCP1B	decapping mRNA 1B
100133957	1.1574	3.3592	2.2888	0.031563	0.36548	-3.6684	UXT-AS1	UXT antisense RNA 1
80270	1.3825	8.7848	2.2881	0.031609	0.36577	-3.6697	HSD3B7	"hydroxy-delta-5-steroid dehydrogenase, 3 beta- and steroid delta-isomerase 7"
57102	-1.2683	7.4683	-2.2874	0.031656	0.36606	-3.6709	C12orf4	chromosome 12 open reading frame 4
122664	1.2297	3.5357	2.2867	0.031701	0.36609	-3.6721	TPPP2	tubulin polymerization promoting protein family member 2
1843	1.1816	16.6	2.2862	0.031735	0.36609	-3.673	DUSP1	dual specificity phosphatase 1
7718	-1.6466	5.4389	-2.2862	0.031739	0.36609	-3.6731	ZNF165	zinc finger protein 165
54187	1.24	12.503	2.286	0.031749	0.36609	-3.6734	NANS	N-acetylneuraminate synthase
2812	-1.3474	11.507	-2.2856	0.031775	0.36609	-3.6741	GP1BB	glycoprotein Ib platelet subunit beta
3113	-1.9101	10.999	-2.2853	0.031795	0.36609	-3.6746	HLA-DPA1	"major histocompatibility complex, class II, DP alpha 1"
2635	-1.9586	9.4234	-2.2852	0.031806	0.36609	-3.6749	GBP3	guanylate binding protein 3
55422	-1.3095	6.7973	-2.2839	0.031891	0.36683	-3.6771	ZNF331	zinc finger protein 331
11044	-1.7026	8.2121	-2.279	0.032226	0.37041	-3.6859	TENT4A	terminal nucleotidyltransferase 4A
9363	1.4042	9.9414	2.2787	0.032245	0.37041	-3.6864	RAB33A	"RAB33A, member RAS oncogene family"
56950	-1.4649	7.543	-2.2779	0.032301	0.37065	-3.6879	SMYD2	SET and MYND domain containing 2
4086	2.0113	6.7336	2.2771	0.032356	0.37065	-3.6893	SMAD1	SMAD family member 1
9975	-1.8074	5.2485	-2.277	0.032362	0.37065	-3.6894	NR1D2	nuclear receptor subfamily 1 group D member 2
64863	-1.7598	6.7829	-2.277	0.032366	0.37065	-3.6896	METTL4	methyltransferase like 4
11346	1.5776	10.828	2.2755	0.032463	0.37065	-3.6921	SYNPO	synaptopodin
103910	1.1879	15.806	2.2748	0.032515	0.37065	-3.6934	MYL12B	myosin light chain 12B
285097	-1.4974	3.1489	-2.2744	0.032542	0.37065	-3.6941	LOC285097	uncharacterized FLJ38379
56623	-1.2964	8.4368	-2.2743	0.032548	0.37065	-3.6943	INPP5E	inositol polyphosphate-5-phosphatase E
143888	-1.6748	3.8143	-2.2736	0.0326	0.37065	-3.6956	POGLUT3	protein O-glucosyltransferase 3
10873	-1.3937	4.0626	-2.2735	0.032602	0.37065	-3.6956	ME3	malic enzyme 3
9538	-1.3431	6.287	-2.2731	0.032633	0.37065	-3.6964	EI24	EI24 autophagy associated transmembrane protein
23241	-2.1884	4.8234	-2.2731	0.032634	0.37065	-3.6965	PACS2	phosphofurin acidic cluster sorting protein 2
2035	-1.9232	7.4737	-2.2731	0.032634	0.37065	-3.6965	EPB41	erythrocyte membrane protein band 4.1
10252	2.0873	8.0955	2.2721	0.032703	0.37065	-3.6983	SPRY1	sprouty RTK signaling antagonist 1
2113	-1.5698	6.6386	-2.2719	0.032717	0.37065	-3.6986	ETS1	"ETS proto-oncogene 1, transcription factor"
57639	-1.5797	8.9935	-2.2716	0.032739	0.37065	-3.6992	CCDC146	coiled-coil domain containing 146
149483	1.2747	6.9342	2.2715	0.032745	0.37065	-3.6993	CCDC17	coiled-coil domain containing 17
357	2.3713	3.9381	2.2712	0.032762	0.37065	-3.6998	SHROOM2	shroom family member 2
51308	1.2073	6.3912	2.2707	0.0328	0.37065	-3.7007	REEP2	receptor accessory protein 2
55454	1.2774	11.561	2.2706	0.032805	0.37065	-3.7009	CSGALNACT2	chondroitin sulfate N-acetylgalactosaminyltransferase 2
55212	-1.1184	3.1444	-2.2703	0.032824	0.37065	-3.7014	BBS7	Bardet-Biedl syndrome 7
54765	-1.1887	8.43	-2.2692	0.032902	0.37065	-3.7034	TRIM44	tripartite motif containing 44
100033422	1.1767	2.5894	2.2692	0.032905	0.37065	-3.7034	SNORD116-10	"small nucleolar RNA, C/D box 116-10"
146330	-2.2507	6.4954	-2.2691	0.03291	0.37065	-3.7035	FBXL16	F-box and leucine rich repeat protein 16
114899	-1.365	4.2627	-2.2691	0.032912	0.37065	-3.7036	C1QTNF3	C1q and TNF related 3
27095	1.1389	10.8	2.2689	0.032923	0.37065	-3.7039	TRAPPC3	trafficking protein particle complex 3
2529	1.4865	9.7459	2.2683	0.032968	0.37065	-3.705	FUT7	fucosyltransferase 7
3676	-1.8281	8.9731	-2.2682	0.032977	0.37065	-3.7052	ITGA4	integrin subunit alpha 4
714	1.3613	3.7302	2.2679	0.032994	0.37065	-3.7057	C1QC	complement C1q C chain
9581	-1.6745	5.4932	-2.2677	0.033008	0.37065	-3.706	PREPL	prolyl endopeptidase like
646201	1.5332	9.2314	2.2677	0.033009	0.37065	-3.7061	BASP1P1	BASP1 pseudogene 1
1111	1.3266	4.5154	2.2676	0.033013	0.37065	-3.7062	CHEK1	checkpoint kinase 1
3620	-1.942	8.5739	-2.2668	0.033073	0.37065	-3.7077	IDO1	"indoleamine 2,3-dioxygenase 1"
7098	-1.3393	3.3069	-2.2667	0.033082	0.37065	-3.7079	TLR3	toll like receptor 3
5533	-1.6958	8.1808	-2.2666	0.033088	0.37065	-3.7081	PPP3CC	protein phosphatase 3 catalytic subunit gamma
1438	1.3135	10.537	2.2665	0.033095	0.37065	-3.7083	CSF2RA	colony stimulating factor 2 receptor subunit alpha
100506191	1.3406	3.2229	2.2664	0.0331	0.37065	-3.7084	100506191	NA
81620	1.7142	5.4155	2.266	0.033127	0.37065	-3.7091	CDT1	chromatin licensing and DNA replication factor 1
1241	1.314	9.8295	2.2656	0.033159	0.37065	-3.7099	LTB4R	leukotriene B4 receptor
2687	1.8323	8.5499	2.2653	0.033178	0.37065	-3.7103	GGT5	gamma-glutamyltransferase 5
1848	-1.4956	13.852	-2.2651	0.033189	0.37065	-3.7106	DUSP6	dual specificity phosphatase 6
9097	-1.6037	4.1628	-2.2647	0.03322	0.37065	-3.7114	USP14	ubiquitin specific peptidase 14
29923	1.7908	7.2619	2.2643	0.033245	0.37065	-3.7121	HILPDA	hypoxia inducible lipid droplet associated
22808	-1.948	4.4923	-2.2642	0.033252	0.37065	-3.7122	MRAS	muscle RAS oncogene homolog
92691	1.901	4.9881	2.2642	0.033255	0.37065	-3.7123	TMEM169	transmembrane protein 169
93058	-2.0195	5.5378	-2.2642	0.033256	0.37065	-3.7123	COQ10A	coenzyme Q10A
7533	1.2412	10.351	2.2635	0.033306	0.37065	-3.7136	YWHAH	tyrosine 3-monooxygenase/tryptophan 5-monooxygenase activation protein eta
9962	-1.9778	7.1952	-2.2634	0.033309	0.37065	-3.7137	SLC23A2	solute carrier family 23 member 2
255488	1.4026	12.659	2.2631	0.033331	0.37065	-3.7142	RNF144B	ring finger protein 144B
57646	-1.6586	3.8735	-2.263	0.033339	0.37065	-3.7144	USP28	ubiquitin specific peptidase 28
144363	0.93425	7.5837	2.2628	0.033356	0.37065	-3.7148	ETFRF1	electron transfer flavoprotein regulatory factor 1
83450	1.2012	3.3817	2.2622	0.033399	0.37089	-3.7159	DRC3	dynein regulatory complex subunit 3
55092	-1.9869	4.2705	-2.2616	0.033435	0.37106	-3.7168	TMEM51	transmembrane protein 51
4049	-1.2675	6.4611	-2.261	0.033478	0.3713	-3.7179	LTA	lymphotoxin alpha
26775	-1.0141	7.5867	-2.2601	0.033548	0.37162	-3.7196	SNORA72	"small nucleolar RNA, H/ACA box 72"
84636	-1.5743	3.87	-2.26	0.03355	0.37162	-3.7197	GPR174	G protein-coupled receptor 174
219743	-1.301	5.4368	-2.2591	0.033619	0.37181	-3.7214	TYSND1	trypsin domain containing 1
814	-1.8352	4.4097	-2.2589	0.033633	0.37181	-3.7218	CAMK4	calcium/calmodulin dependent protein kinase IV
441374	1.2197	2.4954	2.2584	0.033663	0.37181	-3.7225	FLJ42969	uncharacterized LOC441374
4193	1.0535	8.622	2.2584	0.033669	0.37181	-3.7227	MDM2	MDM2 proto-oncogene
1786	-2.1268	6.7361	-2.2583	0.033674	0.37181	-3.7228	DNMT1	DNA methyltransferase 1
9984	-1.6751	4.0757	-2.2574	0.033741	0.37194	-3.7244	THOC1	THO complex 1
541473	1.1812	3.8188	2.2572	0.033751	0.37194	-3.7247	LOC541473	FKBP prolyl isomerase 6 pseudogene
56927	1.1925	11.2	2.2572	0.033751	0.37194	-3.7247	GPR108	G protein-coupled receptor 108
90024	1.2854	9.4388	2.2569	0.033772	0.37194	-3.7252	FLJ20021	uncharacterized LOC90024
200765	-1.0965	7.3032	-2.2563	0.033814	0.37216	-3.7263	TIGD1	tigger transposable element derived 1
11055	-1.6352	4.8958	-2.2554	0.033884	0.37252	-3.728	ZPBP	zona pellucida binding protein
404734	1.0257	10.736	2.2553	0.033889	0.37252	-3.7281	ANKHD1-EIF4EBP3	ANKHD1-EIF4EBP3 readthrough
112840	-1.5282	3.6193	-2.2547	0.033929	0.37272	-3.7291	WDR89	WD repeat domain 89
728431	1.0771	9.8163	2.2539	0.033986	0.37312	-3.7305	LINC01137	long intergenic non-protein coding RNA 1137
92747	1.1621	2.9409	2.2534	0.034023	0.37328	-3.7314	BPIFB1	BPI fold containing family B member 1
79026	-1.9212	8.9064	-2.2531	0.034049	0.37329	-3.7321	AHNAK	AHNAK nucleoprotein
1534	-1.7673	7.6736	-2.2528	0.034067	0.37329	-3.7325	CYB561	cytochrome b561
162239	-1.8692	4.0476	-2.2522	0.03411	0.37353	-3.7336	ZFP1	ZFP1 zinc finger protein
2043	-2.2787	7.0535	-2.25	0.034272	0.37421	-3.7375	EPHA4	EPH receptor A4
11041	-1.8552	3.5228	-2.2496	0.034299	0.37421	-3.7382	B4GAT1	"beta-1,4-glucuronyltransferase 1"
54585	-1.6077	5.4648	-2.2495	0.034303	0.37421	-3.7383	LZTFL1	leucine zipper transcription factor like 1
462	1.2886	5.2243	2.2495	0.034305	0.37421	-3.7384	SERPINC1	serpin family C member 1
100131227	1.2913	2.4925	2.2495	0.034308	0.37421	-3.7384	100131227	NA
27243	1.2895	15.154	2.2492	0.034328	0.37421	-3.7389	CHMP2A	charged multivesicular body protein 2A
5230	1.184	15.007	2.249	0.034343	0.37421	-3.7393	PGK1	phosphoglycerate kinase 1
2537	-1.9288	11.325	-2.2489	0.034351	0.37421	-3.7395	IFI6	interferon alpha inducible protein 6
155054	1.2759	6.0584	2.2487	0.034366	0.37421	-3.7398	ZNF425	zinc finger protein 425
259308	1.2463	2.965	2.248	0.034417	0.37453	-3.7411	FAM205A	family with sequence similarity 205 member A
79145	1.116	10.425	2.2465	0.034523	0.37524	-3.7436	CHCHD7	coiled-coil-helix-coiled-coil-helix domain containing 7
7695	-1.0052	8.4969	-2.2462	0.03455	0.37524	-3.7443	ZNF136	zinc finger protein 136
9497	-1.6807	5.9007	-2.246	0.034564	0.37524	-3.7446	SLC4A7	solute carrier family 4 member 7
3044	-1.3834	4.7833	-2.2456	0.034587	0.37524	-3.7452	HBBP1	hemoglobin subunit beta pseudogene 1
5031	-1.2217	6.1857	-2.2456	0.034591	0.37524	-3.7453	P2RY6	pyrimidinergic receptor P2Y6
401285	-1.438	3.949	-2.2444	0.034681	0.37533	-3.7475	TCP10L2	t-complex 10 like 2
11157	1.4251	12.181	2.2442	0.034695	0.37533	-3.7478	LSM6	"LSM6 homolog, U6 small nuclear RNA and mRNA degradation associated"
26519	-1.7413	9.6728	-2.2441	0.034703	0.37533	-3.748	TIMM10	translocase of inner mitochondrial membrane 10
8872	1.1779	12.821	2.2433	0.03476	0.37533	-3.7494	CDC123	cell division cycle 123
26047	-1.4585	3.0533	-2.2432	0.034765	0.37533	-3.7495	CNTNAP2	contactin associated protein 2
54876	-1.0853	8.5873	-2.2432	0.034765	0.37533	-3.7495	DCAF16	DDB1 and CUL4 associated factor 16
9121	1.3258	12.985	2.2432	0.034769	0.37533	-3.7496	SLC16A5	solute carrier family 16 member 5
23035	-1.7553	4.7454	-2.2431	0.034774	0.37533	-3.7497	PHLPP2	PH domain and leucine rich repeat protein phosphatase 2
144245	-1.2534	5.6997	-2.2426	0.034813	0.37533	-3.7507	ALG10B	"ALG10 alpha-1,2-glucosyltransferase B"
9889	-1.3905	6.2927	-2.2425	0.034816	0.37533	-3.7507	ZBED4	zinc finger BED-type containing 4
54550	1.608	8.1993	2.2418	0.034868	0.37545	-3.752	NECAB2	N-terminal EF-hand calcium binding protein 2
10208	-1.4386	8.6884	-2.2416	0.034887	0.37545	-3.7524	USPL1	ubiquitin specific peptidase like 1
219	1.1337	7.0873	2.2414	0.034902	0.37545	-3.7528	ALDH1B1	aldehyde dehydrogenase 1 family member B1
3977	1.5621	2.3698	2.2412	0.034913	0.37545	-3.7531	LIFR	LIF receptor subunit alpha
55622	-1.6643	6.928	-2.2404	0.034973	0.37549	-3.7545	TTC27	tetratricopeptide repeat domain 27
637	1.2154	15.181	2.24	0.035005	0.37549	-3.7553	BID	BH3 interacting domain death agonist
7538	1.3217	16.663	2.2399	0.035006	0.37549	-3.7553	ZFP36	ZFP36 ring finger protein
51316	1.9491	12.823	2.2392	0.035061	0.37549	-3.7566	PLAC8	placenta associated 8
6556	1.4476	12.366	2.2392	0.035063	0.37549	-3.7566	SLC11A1	solute carrier family 11 member 1
1825	1.2893	3.0639	2.239	0.035072	0.37549	-3.7569	DSC3	desmocollin 3
8437	-1.2002	7.5406	-2.2389	0.03508	0.37549	-3.7571	RASAL1	RAS protein activator like 1
4656	-1.1669	7.4705	-2.2387	0.035096	0.37549	-3.7574	MYOG	myogenin
84707	-1.2268	8.5822	-2.2385	0.035112	0.37549	-3.7578	BEX2	brain expressed X-linked 2
343071	1.3508	3.0848	2.2382	0.035135	0.37551	-3.7584	PRAMEF10	PRAME family member 10
641371	-1.2728	7.4857	-2.2372	0.035208	0.37605	-3.7601	ACOT1	acyl-CoA thioesterase 1
414325	1.2265	3.2665	2.2359	0.035308	0.37645	-3.7625	DEFB103A	defensin beta 103A
785	-1.7892	4.3082	-2.2358	0.035316	0.37645	-3.7627	CACNB4	calcium voltage-gated channel auxiliary subunit beta 4
2516	-1.0719	5.5056	-2.2357	0.03532	0.37645	-3.7628	NR5A1	nuclear receptor subfamily 5 group A member 1
5721	-1.3444	14.301	-2.2356	0.035332	0.37645	-3.763	PSME2	proteasome activator subunit 2
79039	-1.1388	9.1972	-2.2352	0.035358	0.3765	-3.7637	DDX54	DEAD-box helicase 54
2212	1.3062	15.128	2.2344	0.035414	0.37687	-3.765	FCGR2A	Fc fragment of IgG receptor IIa
201305	-1.4085	9.0109	-2.234	0.035449	0.37701	-3.7658	SPNS3	sphingolipid transporter 3 (putative)
2006	-1.3246	8.9953	-2.2329	0.035533	0.37762	-3.7678	ELN	elastin
8869	-1.5681	6.0578	-2.2326	0.03555	0.37762	-3.7682	ST3GAL5	"ST3 beta-galactoside alpha-2,3-sialyltransferase 5"
138799	1.3258	3.6751	2.2319	0.035605	0.37797	-3.7695	OR13C5	olfactory receptor family 13 subfamily C member 5
23574	2.2945	4.1917	2.2306	0.0357	0.37828	-3.7717	PRG1	p53-responsive gene 1
10732	1.3584	9.4038	2.2306	0.035705	0.37828	-3.7718	TCFL5	transcription factor like 5
100507629	1.2032	4.7739	2.2302	0.03573	0.37828	-3.7724	LINC00658	long intergenic non-protein coding RNA 658
85446	1.1407	4.3719	2.2299	0.035755	0.37828	-3.773	ZFHX2	zinc finger homeobox 2
22909	-1.4123	6.2885	-2.2298	0.035762	0.37828	-3.7732	FAN1	FANCD2 and FANCI associated nuclease 1
3355	1.293	3.2187	2.2298	0.035765	0.37828	-3.7732	HTR1F	5-hydroxytryptamine receptor 1F
10771	-1.5256	4.6767	-2.2288	0.035841	0.37885	-3.775	ZMYND11	zinc finger MYND-type containing 11
873	-1.7061	7.7388	-2.2281	0.035891	0.37915	-3.7762	CBR1	carbonyl reductase 1
3117	-2.2542	6.8561	-2.2267	0.035994	0.37988	-3.7786	HLA-DQA1	"major histocompatibility complex, class II, DQ alpha 1"
29102	-1.4361	9.0886	-2.2266	0.036004	0.37988	-3.7788	DROSHA	drosha ribonuclease III
126917	-1.5222	7.8329	-2.2252	0.036114	0.38066	-3.7814	IFFO2	intermediate filament family orphan 2
8807	1.4466	15.015	2.2246	0.036155	0.38066	-3.7823	IL18RAP	interleukin 18 receptor accessory protein
90313	-1.1324	9.123	-2.2246	0.03616	0.38066	-3.7824	TP53I13	tumor protein p53 inducible protein 13
3013	1.6466	16.196	2.2232	0.036266	0.38066	-3.7849	H2AC7	H2A clustered histone 7
22934	-1.3552	10.639	-2.2231	0.036269	0.38066	-3.7849	RPIA	ribose 5-phosphate isomerase A
3595	-1.5985	3.2658	-2.2229	0.036282	0.38066	-3.7852	IL12RB2	interleukin 12 receptor subunit beta 2
1240	-2.0793	4.4706	-2.2227	0.036305	0.38066	-3.7858	CMKLR1	chemerin chemokine-like receptor 1
10147	-1.2955	7.8756	-2.2226	0.036312	0.38066	-3.7859	SUGP2	SURP and G-patch domain containing 2
27134	-1.2093	5.1803	-2.2223	0.036335	0.38066	-3.7865	TJP3	tight junction protein 3
3710	-2.1545	5.2456	-2.2216	0.036387	0.38066	-3.7877	ITPR3	"inositol 1,4,5-trisphosphate receptor type 3"
5911	-1.8476	6.1542	-2.2215	0.036393	0.38066	-3.7878	RAP2A	"RAP2A, member of RAS oncogene family"
6648	1.4216	17.084	2.2215	0.036396	0.38066	-3.7879	SOD2	superoxide dismutase 2
390664	1.4802	3.4833	2.2211	0.036421	0.38066	-3.7884	C1QTNF8	C1q and TNF related 8
54680	-2.2295	4.8816	-2.2207	0.036455	0.38066	-3.7892	ZNHIT6	zinc finger HIT-type containing 6
57552	-1.6547	6.247	-2.2205	0.036468	0.38066	-3.7895	NCEH1	neutral cholesterol ester hydrolase 1
10236	-1.2961	9.8792	-2.2205	0.036471	0.38066	-3.7896	HNRNPR	heterogeneous nuclear ribonucleoprotein R
4013	1.4794	6.9736	2.2202	0.036492	0.38066	-3.7901	VWA5A	von Willebrand factor A domain containing 5A
285362	1.136	11.547	2.22	0.036506	0.38066	-3.7904	SUMF1	sulfatase modifying factor 1
8698	1.378	16.638	2.2199	0.036512	0.38066	-3.7905	S1PR4	sphingosine-1-phosphate receptor 4
2012	-1.6521	6.1881	-2.2197	0.036533	0.38066	-3.791	EMP1	epithelial membrane protein 1
8916	-1.9938	6.1743	-2.2192	0.036572	0.38066	-3.7919	HERC3	HECT and RLD domain containing E3 ubiquitin protein ligase 3
832	1.0156	11.741	2.219	0.036585	0.38066	-3.7922	CAPZB	capping actin protein of muscle Z-line subunit beta
10318	1.2853	14.238	2.219	0.036587	0.38066	-3.7922	TNIP1	TNFAIP3 interacting protein 1
267012	1.0956	2.9895	2.2187	0.036605	0.38066	-3.7926	DAOA	D-amino acid oxidase activator
728147	-1.2588	3.4444	-2.2176	0.036695	0.38137	-3.7947	728147	NA
114783	-1.4256	5.8323	-2.2153	0.036871	0.38227	-3.7987	LMTK3	lemur tyrosine kinase 3
55623	-1.3531	8.3588	-2.2152	0.036876	0.38227	-3.7988	THUMPD1	THUMP domain containing 1
285440	-1.8849	3.2508	-2.2149	0.036899	0.38227	-3.7993	CYP4V2	cytochrome P450 family 4 subfamily V member 2
55257	1.2935	8.9181	2.2144	0.03694	0.38227	-3.8003	MRGBP	MRG domain binding protein
723790	1.7529	14.82	2.2142	0.036957	0.38227	-3.8006	H2AC19	H2A clustered histone 19
11135	-1.1652	7.1694	-2.2141	0.036964	0.38227	-3.8008	CDC42EP1	CDC42 effector protein 1
1912	1.3555	15.182	2.2139	0.036976	0.38227	-3.8011	PHC2	polyhomeotic homolog 2
643	-1.8887	5.8161	-2.2136	0.037	0.38227	-3.8016	CXCR5	C-X-C motif chemokine receptor 5
401251	-1.431	6.3434	-2.2135	0.037007	0.38227	-3.8018	SAPCD1	suppressor APC domain containing 1
143630	-1.415	6.4927	-2.2133	0.037024	0.38227	-3.8022	UBQLNL	ubiquilin like
379013	-1.3975	9.8553	-2.2132	0.037037	0.38227	-3.8024	RNF138P1	ring finger protein 138 pseudogene 1
3101	1.6151	10.844	2.213	0.037046	0.38227	-3.8026	HK3	hexokinase 3
387923	-1.1924	5.1653	-2.2126	0.037081	0.38241	-3.8034	SERP2	stress associated endoplasmic reticulum protein family member 2
27161	1.3678	12.182	2.2121	0.037119	0.38257	-3.8043	AGO2	argonaute RISC catalytic component 2
2353	1.6134	15.376	2.2115	0.037167	0.38284	-3.8054	FOS	"Fos proto-oncogene, AP-1 transcription factor subunit"
54930	1.3363	10.533	2.2106	0.037235	0.38302	-3.8069	HAUS4	HAUS augmin like complex subunit 4
2534	-2.0212	9.4161	-2.2104	0.037253	0.38302	-3.8073	FYN	"FYN proto-oncogene, Src family tyrosine kinase"
3298	-1.3115	7.6616	-2.2103	0.03726	0.38302	-3.8075	HSF2	heat shock transcription factor 2
30818	1.2585	2.453	2.21	0.037284	0.38302	-3.808	KCNIP3	potassium voltage-gated channel interacting protein 3
692089	-1.2863	2.6627	-2.2096	0.037317	0.38302	-3.8087	SNORD19	"small nucleolar RNA, C/D box 19"
3467	1.3754	2.4846	2.2093	0.037341	0.38302	-3.8093	IFNW1	interferon omega 1
100506486	0.96653	6.268	2.2091	0.037353	0.38302	-3.8095	100506486	NA
29761	-1.7645	8.7232	-2.2089	0.037371	0.38302	-3.8099	USP25	ubiquitin specific peptidase 25
221883	1.2442	3.6815	2.2087	0.037383	0.38302	-3.8102	HOXA11-AS	HOXA11 antisense RNA
221458	1.0313	2.8799	2.2083	0.037415	0.3831	-3.8109	KIF6	kinesin family member 6
257019	-1.6796	7.2272	-2.2081	0.037436	0.3831	-3.8114	FRMD3	FERM domain containing 3
2790	1.3571	15.486	2.2072	0.037505	0.38351	-3.8129	GNG10	G protein subunit gamma 10
5796	-1.3841	5.941	-2.2067	0.037541	0.38351	-3.8137	PTPRK	protein tyrosine phosphatase receptor type K
57732	-1.4339	5.1343	-2.2064	0.037562	0.38351	-3.8142	ZFYVE28	zinc finger FYVE-type containing 28
126119	1.3054	4.2449	2.2063	0.037572	0.38351	-3.8144	JOSD2	Josephin domain containing 2
9540	1.4311	9.8361	2.2057	0.037622	0.38351	-3.8155	TP53I3	tumor protein p53 inducible protein 3
220077	0.96745	5.8325	2.2056	0.037627	0.38351	-3.8156	LOC220077	dedicator of cytokinesis 1 pseudogene
100128298	-1.7866	5.1583	-2.2052	0.037659	0.38351	-3.8163	100128298	NA
55129	1.3448	11.587	2.2039	0.037761	0.38351	-3.8186	ANO10	anoctamin 10
80212	-1.35	7.5952	-2.2038	0.03777	0.38351	-3.8188	CCDC92	coiled-coil domain containing 92
79948	1.1538	3.7295	2.2037	0.037781	0.38351	-3.8191	PLPPR3	phospholipid phosphatase related 3
10903	-2.0245	3.9935	-2.2034	0.0378	0.38351	-3.8195	MTMR11	myotubularin related protein 11
91107	-1.3695	6.7595	-2.2034	0.037804	0.38351	-3.8196	TRIM47	tripartite motif containing 47
100506736	-1.3628	3.0355	-2.2033	0.037809	0.38351	-3.8197	SLFN12L	schlafen family member 12 like
131034	1.1201	4.9838	2.2032	0.037816	0.38351	-3.8198	CPNE4	copine 4
5816	-1.1123	5.9971	-2.203	0.037835	0.38351	-3.8202	PVALB	parvalbumin
84067	1.3856	13.328	2.2029	0.037843	0.38351	-3.8204	FAM160A2	family with sequence similarity 160 member A2
79722	1.1459	8.9256	2.2028	0.037851	0.38351	-3.8206	ANKRD55	ankyrin repeat domain 55
283507	-1.5843	4.3743	-2.2022	0.037894	0.38372	-3.8215	SUGT1P3	SUGT1 pseudogene 3
55201	1.3111	13.452	2.2015	0.037954	0.3841	-3.8229	MAP1S	microtubule associated protein 1S
113419	-1.122	6.7938	-2.2009	0.037998	0.38418	-3.8238	TEX261	testis expressed 261
55786	-1.2844	3.9023	-2.2008	0.038012	0.38418	-3.8241	ZNF415	zinc finger protein 415
677770	1.5769	13.445	2.2006	0.038029	0.38418	-3.8245	SCARNA22	small Cajal body-specific RNA 22
81470	1.3168	3.361	2.2001	0.038065	0.38433	-3.8253	OR2G2	olfactory receptor family 2 subfamily G member 2
153643	-1.2404	2.9465	-2.1995	0.038116	0.38462	-3.8264	FAM81B	family with sequence similarity 81 member B
1236	-2.1193	9.4875	-2.1984	0.038198	0.38497	-3.8282	CCR7	C-C motif chemokine receptor 7
5547	1.2448	14.708	2.198	0.038229	0.38497	-3.8289	PRCP	prolylcarboxypeptidase
84153	-1.1101	8.4252	-2.1974	0.038277	0.38497	-3.8299	RNASEH2C	ribonuclease H2 subunit C
115362	-1.8761	13.935	-2.1973	0.038291	0.38497	-3.8302	GBP5	guanylate binding protein 5
9533	-1.508	5.8172	-2.1971	0.038302	0.38497	-3.8305	POLR1C	RNA polymerase I and III subunit C
162989	1.2202	13.471	2.1968	0.038327	0.38497	-3.831	DEDD2	death effector domain containing 2
10398	-1.2941	5.9884	-2.1963	0.038367	0.38497	-3.8319	MYL9	myosin light chain 9
720	1.1258	4.9091	2.1963	0.03837	0.38497	-3.832	C4A	complement C4A (Rodgers blood group)
683	1.356	12.822	2.1962	0.038381	0.38497	-3.8322	BST1	bone marrow stromal cell antigen 1
161176	1.5608	6.4615	2.1961	0.038383	0.38497	-3.8322	SYNE3	spectrin repeat containing nuclear envelope family member 3
126014	1.1199	13.171	2.1957	0.038415	0.38497	-3.8329	OSCAR	osteoclast associated Ig-like receptor
5458	-1.262	4.4182	-2.1954	0.038444	0.38497	-3.8336	POU4F2	POU class 4 homeobox 2
56127	1.4347	3.9327	2.1952	0.038459	0.38497	-3.8339	PCDHB9	protocadherin beta 9
390226	1.135	3.6386	2.195	0.038473	0.38497	-3.8342	GUCY2EP	"guanylate cyclase 2E, pseudogene"
995	1.2328	4.3312	2.1944	0.038525	0.38497	-3.8353	CDC25C	cell division cycle 25C
2888	-1.5184	4.3648	-2.1943	0.038528	0.38497	-3.8354	GRB14	growth factor receptor bound protein 14
22806	-1.8862	4.1552	-2.1941	0.038549	0.38497	-3.8358	IKZF3	IKAROS family zinc finger 3
80237	-1.0871	5.2235	-2.1941	0.03855	0.38497	-3.8359	ELL3	elongation factor for RNA polymerase II 3
8970	1.2053	11.279	2.1934	0.0386	0.385	-3.8369	H2BC11	H2B clustered histone 11
9710	-1.4342	8.9665	-2.1931	0.038631	0.385	-3.8376	KIAA0355	KIAA0355
10162	1.1542	13.413	2.1928	0.038653	0.385	-3.8381	LPCAT3	lysophosphatidylcholine acyltransferase 3
8453	-1.2723	7.7081	-2.1927	0.03866	0.385	-3.8382	CUL2	cullin 2
55920	-1.63	8.2316	-2.1925	0.038672	0.385	-3.8385	RCC2	regulator of chromosome condensation 2
80019	1.4804	11.944	2.1923	0.038694	0.385	-3.839	UBTD1	ubiquitin domain containing 1
54821	1.3414	3.2802	2.192	0.038716	0.385	-3.8394	ERCC6L	"ERCC excision repair 6 like, spindle assembly checkpoint helicase"
64478	1.0752	3.13	2.1916	0.038748	0.385	-3.8401	CSMD1	CUB and Sushi multiple domains 1
4580	1.2148	11.272	2.1915	0.038753	0.385	-3.8402	MTX1	metaxin 1
100873946	1.1568	5.3986	2.1907	0.03882	0.38544	-3.8417	VAV3-AS1	VAV3 antisense RNA 1
55248	-1.8662	5.5954	-2.1904	0.03885	0.38552	-3.8423	PACC1	proton activated chloride channel 1
343171	-2.0272	5.8735	-2.1891	0.03895	0.3863	-3.8445	OR2W3	olfactory receptor family 2 subfamily W member 3
25894	-1.3316	5.8946	-2.1888	0.038979	0.38636	-3.8451	PLEKHG4	pleckstrin homology and RhoGEF domain containing G4
161394	1.336	2.7302	2.1881	0.039031	0.38654	-3.8462	SAMD15	sterile alpha motif domain containing 15
2306	-1.2375	5.7003	-2.188	0.039042	0.38654	-3.8464	FOXD2	forkhead box D2
3568	-1.9795	7.6026	-2.1872	0.03911	0.38683	-3.8479	IL5RA	interleukin 5 receptor subunit alpha
100507261	1.2853	2.518	2.1871	0.039116	0.38683	-3.848	MIR670HG	MIR670 host gene
64805	-1.4064	4.6397	-2.185	0.039291	0.38821	-3.8517	P2RY12	purinergic receptor P2Y12
3208	1.1048	2.937	2.1846	0.039316	0.38821	-3.8522	HPCA	hippocalcin
5988	-1.345	4.7737	-2.1845	0.039327	0.38821	-3.8525	RFPL1	ret finger protein like 1
9397	-1.4585	4.0865	-2.184	0.039365	0.38821	-3.8533	NMT2	N-myristoyltransferase 2
343521	1.0738	8.0421	2.184	0.039367	0.38821	-3.8533	TCTEX1D4	Tctex1 domain containing 4
9315	-1.252	6.3714	-2.1837	0.039393	0.38824	-3.8539	NREP	neuronal regeneration related protein
9374	-1.5183	5.6192	-2.1821	0.039521	0.38915	-3.8566	PPT2	palmitoyl-protein thioesterase 2
3700	1.5592	11.348	2.182	0.039535	0.38915	-3.8569	ITIH4	inter-alpha-trypsin inhibitor heavy chain 4
100113407	-1.418	10.141	-2.1817	0.03956	0.38915	-3.8574	TMEM170B	transmembrane protein 170B
100499489	-1.2345	6.2333	-2.1815	0.039574	0.38915	-3.8577	LOC100499489	uncharacterized LOC100499489
170949	1.4558	4.1917	2.1811	0.039605	0.38923	-3.8584	DEFT1P	"defensin theta 1, pseudogene"
51678	-1.6783	3.1581	-2.18	0.039701	0.38995	-3.8604	MPP6	membrane palmitoylated protein 6
26053	-1.4625	7.4685	-2.1793	0.039759	0.39015	-3.8616	AUTS2	activator of transcription and developmental regulator AUTS2
83740	1.1967	8.0723	2.1792	0.039766	0.39015	-3.8617	H2AB3	H2A.B variant histone 3
59352	-1.4162	9.5421	-2.1788	0.0398	0.39026	-3.8624	LGR6	leucine rich repeat containing G protein-coupled receptor 6
23062	-1.7323	6.9488	-2.1781	0.039859	0.39062	-3.8637	GGA2	"golgi associated, gamma adaptin ear containing, ARF binding protein 2"
1118	1.0158	9.9113	2.1766	0.039982	0.39152	-3.8662	CHIT1	chitinase 1
6736	1.511	2.4208	2.1754	0.040082	0.39152	-3.8683	SRY	sex determining region Y
283159	-1.428	5.8254	-2.1754	0.040083	0.39152	-3.8683	OR8D1	olfactory receptor family 8 subfamily D member 1
2744	-1.4079	10.011	-2.1752	0.040097	0.39152	-3.8686	GLS	glutaminase
66035	-1.3862	3.4443	-2.1752	0.040098	0.39152	-3.8687	SLC2A11	solute carrier family 2 member 11
162967	-1.0054	6.3761	-2.1751	0.040106	0.39152	-3.8688	ZNF320	zinc finger protein 320
23184	-1.352	5.5286	-2.1744	0.040162	0.39152	-3.87	MESD	mesoderm development LRP chaperone
57475	-1.4482	3.9807	-2.1741	0.040187	0.39152	-3.8705	PLEKHH1	"pleckstrin homology, MyTH4 and FERM domain containing H1"
221421	1.7334	12.316	2.1739	0.040211	0.39152	-3.871	RSPH9	radial spoke head component 9
7678	-1.465	5.8506	-2.1737	0.040226	0.39152	-3.8713	ZNF124	zinc finger protein 124
4329	-1.1034	6.5658	-2.1734	0.040251	0.39152	-3.8718	ALDH6A1	aldehyde dehydrogenase 6 family member A1
283516	1.7695	7.6947	2.1728	0.040296	0.39152	-3.8728	283516	NA
5003	1.2018	7.5348	2.1727	0.040304	0.39152	-3.8729	SLC22A18AS	solute carrier family 22 member 18 antisense
1075	1.1045	10.155	2.1727	0.040307	0.39152	-3.873	CTSC	cathepsin C
80221	-1.9999	5.6679	-2.1724	0.04033	0.39152	-3.8735	ACSF2	acyl-CoA synthetase family member 2
158402	-1.2451	5.0975	-2.1714	0.040419	0.39152	-3.8753	158402	NA
2015	1.5339	10.261	2.1713	0.040424	0.39152	-3.8754	ADGRE1	adhesion G protein-coupled receptor E1
10395	1.183	5.0676	2.1712	0.040435	0.39152	-3.8756	DLC1	DLC1 Rho GTPase activating protein
729288	-2.0093	4.5297	-2.171	0.040446	0.39152	-3.8759	ZNF286B	zinc finger protein 286B (pseudogene)
10526	-1.224	9.596	-2.171	0.040447	0.39152	-3.8759	IPO8	importin 8
3735	-1.1013	10.699	-2.1708	0.040467	0.39152	-3.8763	KARS1	lysyl-tRNA synthetase 1
339512	1.2322	2.3454	2.1705	0.040489	0.39152	-3.8767	CCDC190	coiled-coil domain containing 190
58472	1.2076	15.59	2.1703	0.040507	0.39152	-3.8771	SQOR	sulfide quinone oxidoreductase
84314	1.4829	11.365	2.1701	0.04053	0.39152	-3.8776	TMEM107	transmembrane protein 107
5196	-2.0264	10.56	-2.1693	0.040591	0.39152	-3.8788	PF4	platelet factor 4
55124	-1.5082	5.3821	-2.169	0.040618	0.39152	-3.8794	PIWIL2	piwi like RNA-mediated gene silencing 2
25945	-1.2496	3.1443	-2.169	0.040623	0.39152	-3.8795	NECTIN3	nectin cell adhesion molecule 3
51278	1.3211	14.542	2.1686	0.040654	0.39152	-3.8801	IER5	immediate early response 5
10714	1.2967	10.348	2.1686	0.040657	0.39152	-3.8802	POLD3	"DNA polymerase delta 3, accessory subunit"
100188949	-1.4979	6.4223	-2.1681	0.040691	0.39152	-3.8809	LINC00426	long intergenic non-protein coding RNA 426
53373	-1.4597	7.1035	-2.1681	0.040694	0.39152	-3.8809	TPCN1	two pore segment channel 1
55093	1.4617	5.6939	2.1681	0.040696	0.39152	-3.881	WDYHV1	WDYHV motif containing 1
51125	1.0325	12.397	2.1681	0.040697	0.39152	-3.881	GOLGA7	golgin A7
100505985	1.9906	2.7355	2.1678	0.040719	0.39152	-3.8814	LOC100505985	uncharacterized LOC100505985
124538	1.1637	3.8792	2.167	0.040792	0.39201	-3.8829	OR4D2	olfactory receptor family 4 subfamily D member 2
6920	-1.7212	3.5705	-2.1661	0.040865	0.39242	-3.8844	TCEA3	transcription elongation factor A3
10800	-1.3232	9.5006	-2.1659	0.04088	0.39242	-3.8847	CYSLTR1	cysteinyl leukotriene receptor 1
8669	-1.0756	7.4015	-2.1656	0.040908	0.39248	-3.8853	EIF3J	eukaryotic translation initiation factor 3 subunit J
729732	1.3094	10.504	2.1651	0.040954	0.39269	-3.8862	LOC729732	uncharacterized LOC729732
387104	-1.346	2.1469	-2.1641	0.041031	0.39322	-3.8878	SOGA3	SOGA family member 3
3613	1.2503	13.539	2.1629	0.041141	0.3936	-3.89	IMPA2	inositol monophosphatase 2
9724	-1.2687	6.883	-2.1627	0.041151	0.3936	-3.8902	UTP14C	UTP14C small subunit processome component
28234	1.0084	2.479	2.1627	0.041152	0.3936	-3.8902	SLCO1B3	solute carrier organic anion transporter family member 1B3
387882	-2.3299	6.2079	-2.1626	0.041161	0.3936	-3.8904	C12orf75	chromosome 12 open reading frame 75
8339	1.3316	11.666	2.1623	0.041187	0.39363	-3.891	H2BC8	H2B clustered histone 8
9751	-0.99071	6.1951	-2.1609	0.041307	0.39425	-3.8934	SNPH	syntaphilin
8705	1.2619	12.141	2.1609	0.041313	0.39425	-3.8935	B3GALT4	"beta-1,3-galactosyltransferase 4"
79650	1.2493	13.806	2.1608	0.041321	0.39425	-3.8936	USB1	U6 snRNA biogenesis phosphodiesterase 1
3667	-1.1592	3.1656	-2.16	0.041383	0.3943	-3.8949	IRS1	insulin receptor substrate 1
100130889	1.1203	6.4695	2.1598	0.041402	0.3943	-3.8953	PSORS1C3	psoriasis susceptibility 1 candidate 3
54206	-1.5268	4.4436	-2.1597	0.041411	0.3943	-3.8955	ERRFI1	ERBB receptor feedback inhibitor 1
200403	1.1079	3.3763	2.1597	0.041417	0.3943	-3.8956	VWA3B	von Willebrand factor A domain containing 3B
100529067	1.2789	4.8408	2.1593	0.041443	0.39433	-3.8961	SERF2-C15ORF63	SERF2-C15orf63 readthrough
1192	1.0981	15.405	2.1589	0.041481	0.39447	-3.8968	CLIC1	chloride intracellular channel 1
8338	1.4166	12.604	2.1584	0.041522	0.39465	-3.8977	H2AC20	H2A clustered histone 20
55835	-1.2011	6.6028	-2.1569	0.041654	0.39508	-3.9003	CENPJ	centromere protein J
64744	1.0609	15.082	2.1568	0.041659	0.39508	-3.9004	SMAP2	small ArfGAP2
729759	1.732	2.4961	2.1566	0.04168	0.39508	-3.9008	OR4F29	olfactory receptor family 4 subfamily F member 29
390245	1.3103	3.1717	2.1566	0.041682	0.39508	-3.9009	KDM4E	lysine demethylase 4E
130399	-1.2338	3.8448	-2.1561	0.041722	0.39508	-3.9017	ACVR1C	activin A receptor type 1C
50853	1.5777	8.1725	2.1561	0.041723	0.39508	-3.9017	VILL	villin like
114548	1.4055	12.58	2.1557	0.041757	0.39508	-3.9024	NLRP3	NLR family pyrin domain containing 3
2793	-1.5095	5.6865	-2.1555	0.041777	0.39508	-3.9028	GNGT2	G protein subunit gamma transducin 2
22916	-1.9976	6.4742	-2.1551	0.041808	0.39508	-3.9034	NCBP2	nuclear cap binding protein subunit 2
29993	-1.5029	6.4597	-2.1548	0.041837	0.39508	-3.904	PACSIN1	protein kinase C and casein kinase substrate in neurons 1
9306	-1.3537	2.3305	-2.1547	0.041841	0.39508	-3.904	SOCS6	suppressor of cytokine signaling 6
11059	-1.3459	8.6765	-2.1547	0.041848	0.39508	-3.9042	WWP1	WW domain containing E3 ubiquitin protein ligase 1
146225	1.726	14.98	2.1543	0.041878	0.39508	-3.9048	CMTM2	CKLF like MARVEL transmembrane domain containing 2
51754	-1.2178	5.5199	-2.1542	0.041886	0.39508	-3.9049	TMEM8B	transmembrane protein 8B
285628	-1.9056	5.0354	-2.1525	0.042036	0.39628	-3.9079	285628	NA
1493	-1.8941	5.9392	-2.152	0.04208	0.39648	-3.9088	CTLA4	cytotoxic T-lymphocyte associated protein 4
84886	-1.1516	8.8282	-2.1513	0.042146	0.39688	-3.9101	C1orf198	chromosome 1 open reading frame 198
56919	-1.5141	5.1724	-2.1508	0.042184	0.39688	-3.9108	DHX33	DEAH-box helicase 33
10865	1.1506	12.685	2.1507	0.042191	0.39688	-3.911	ARID5A	AT-rich interaction domain 5A
255809	1.4953	10.915	2.149	0.042339	0.39795	-3.9139	C19orf38	chromosome 19 open reading frame 38
26049	-1.6945	4.0828	-2.1488	0.042357	0.39795	-3.9142	FAM169A	family with sequence similarity 169 member A
3909	-2.5914	5.3498	-2.1485	0.042387	0.39795	-3.9148	LAMA3	laminin subunit alpha 3
5169	-1.1441	4.2974	-2.1484	0.042396	0.39795	-3.915	ENPP3	ectonucleotide pyrophosphatase/phosphodiesterase 3
7128	1.4005	14.482	2.1479	0.042439	0.39813	-3.9158	TNFAIP3	TNF alpha induced protein 3
401546	1.7133	3.5443	2.1463	0.042582	0.39862	-3.9186	C9orf152	chromosome 9 open reading frame 152
9644	-1.1183	5.6512	-2.1461	0.042601	0.39862	-3.919	SH3PXD2A	SH3 and PX domains 2A
3111	-1.2627	8.0779	-2.146	0.042605	0.39862	-3.9191	HLA-DOA	"major histocompatibility complex, class II, DO alpha"
79370	1.1777	2.5027	2.1459	0.042618	0.39862	-3.9193	BCL2L14	BCL2 like 14
55013	-2.1139	7.9416	-2.1459	0.042619	0.39862	-3.9193	MCUB	mitochondrial calcium uniporter dominant negative subunit beta
27232	1.2494	7.3354	2.1457	0.042629	0.39862	-3.9195	GNMT	glycine N-methyltransferase
30	0.97357	14.045	2.1451	0.042684	0.39892	-3.9206	ACAA1	acetyl-CoA acyltransferase 1
57105	-1.3411	4.3208	-2.1449	0.042707	0.39892	-3.9211	CYSLTR2	cysteinyl leukotriene receptor 2
55332	1.2786	11.301	2.1445	0.042737	0.39898	-3.9216	DRAM1	DNA damage regulated autophagy modulator 1
161291	-1.5411	4.5399	-2.1442	0.042765	0.39904	-3.9222	TMEM30B	transmembrane protein 30B
161424	-1.2175	6.3932	-2.1432	0.042855	0.39966	-3.9239	NOP9	NOP9 nucleolar protein
51635	1.0745	13.053	2.1421	0.042956	0.40002	-3.9259	DHRS7	dehydrogenase/reductase 7
9355	1.1683	4.0205	2.1418	0.042975	0.40002	-3.9262	LHX2	LIM homeobox 2
8819	1.5439	11.219	2.1412	0.043031	0.40002	-3.9273	SAP30	Sin3A associated protein 30
643763	-1.5754	4.5539	-2.1411	0.043042	0.40002	-3.9275	NKAIN3-IT1	NKAIN3 intronic transcript
11344	1.2343	10.973	2.1401	0.043134	0.40002	-3.9293	TWF2	twinfilin actin binding protein 2
9531	-1.606	3.6527	-2.1398	0.043158	0.40002	-3.9298	BAG3	BAG cochaperone 3
51616	-1.467	5.061	-2.1391	0.043217	0.40002	-3.9309	TAF9B	TATA-box binding protein associated factor 9b
90987	-1.645	3.7922	-2.1391	0.043218	0.40002	-3.9309	ZNF251	zinc finger protein 251
9645	0.93727	5.2277	2.1391	0.043218	0.40002	-3.9309	MICAL2	"microtubule associated monooxygenase, calponin and LIM domain containing 2"
100506089	1.0884	3.2694	2.1389	0.043233	0.40002	-3.9312	100506089	NA
2487	1.4351	2.8046	2.1389	0.043238	0.40002	-3.9313	FRZB	frizzled related protein
283537	1.0585	8.5166	2.1383	0.043289	0.40002	-3.9323	SLC46A3	solute carrier family 46 member 3
9218	1.0768	11.455	2.138	0.043315	0.40002	-3.9328	VAPA	VAMP associated protein A
55183	-1.2855	7.8827	-2.138	0.043323	0.40002	-3.9329	RIF1	replication timing regulatory factor 1
28951	-1.6143	5.155	-2.1379	0.043325	0.40002	-3.933	TRIB2	tribbles pseudokinase 2
100271849	1.3517	12.044	2.1377	0.043347	0.40002	-3.9334	MEF2B	myocyte enhancer factor 2B
6289	1.5257	3.6198	2.1377	0.043347	0.40002	-3.9334	SAA2	serum amyloid A2
58473	-1.4589	6.3269	-2.1375	0.043366	0.40002	-3.9338	PLEKHB1	pleckstrin homology domain containing B1
10592	-1.5247	3.9819	-2.1374	0.043372	0.40002	-3.9339	SMC2	structural maintenance of chromosomes 2
116135	-1.2176	4.9243	-2.1373	0.043382	0.40002	-3.9341	LRRC3B	leucine rich repeat containing 3B
2352	2.0268	12.305	2.1367	0.043433	0.40002	-3.935	FOLR3	folate receptor gamma
55014	-1.0627	7.2051	-2.1363	0.043473	0.40002	-3.9358	STX17	syntaxin 17
3122	-2.0073	11.093	-2.1362	0.043479	0.40002	-3.9359	HLA-DRA	"major histocompatibility complex, class II, DR alpha"
219793	-1.3261	6.7817	-2.136	0.043496	0.40002	-3.9362	TBATA	"thymus, brain and testes associated"
55856	1.1536	11.022	2.1359	0.043506	0.40002	-3.9364	ACOT13	acyl-CoA thioesterase 13
3046	1.09	3.0216	2.1359	0.043508	0.40002	-3.9365	HBE1	hemoglobin subunit epsilon 1
56253	-2.0083	4.7889	-2.1358	0.043517	0.40002	-3.9366	CRTAM	cytotoxic and regulatory T cell molecule
5610	-1.3726	11.465	-2.1343	0.043651	0.40103	-3.9392	EIF2AK2	eukaryotic translation initiation factor 2 alpha kinase 2
84057	1.5588	4.3639	2.1338	0.043694	0.40103	-3.94	MND1	meiotic nuclear divisions 1
81392	0.97546	2.6664	2.1337	0.043706	0.40103	-3.9402	OR2AE1	olfactory receptor family 2 subfamily AE member 1
400569	1.0391	10.543	2.1332	0.043751	0.40103	-3.9411	MED11	mediator complex subunit 11
5813	-1.5963	8.2344	-2.1332	0.043751	0.40103	-3.9411	PURA	purine rich element binding protein A
1777	1.4009	8.1651	2.1322	0.043843	0.40103	-3.9428	DNASE2	"deoxyribonuclease 2, lysosomal"
55907	-1.175	7.0843	-2.1322	0.043844	0.40103	-3.9428	CMAS	cytidine monophosphate N-acetylneuraminic acid synthetase
729220	-1.0102	6.2828	-2.1321	0.043848	0.40103	-3.9429	FLJ45513	uncharacterized LOC729220
728377	1.1943	4.265	2.1319	0.043867	0.40103	-3.9433	ARHGEF34P	"Rho guanine nucleotide exchange factor 34, pseudogene"
163081	-1.2437	5.5862	-2.1317	0.043887	0.40103	-3.9437	ZNF567	zinc finger protein 567
55333	-1.3641	5.8238	-2.1314	0.043916	0.40103	-3.9442	SYNJ2BP	synaptojanin 2 binding protein
100499483	-1.633	4.1327	-2.1313	0.043921	0.40103	-3.9443	CCDC180	coiled-coil domain containing 180
255231	-1.8055	5.1607	-2.1313	0.043927	0.40103	-3.9444	MCOLN2	mucolipin 2
313	1.0167	12.596	2.1306	0.043984	0.40114	-3.9455	AOAH	acyloxyacyl hydrolase
55853	1.0356	6.3566	2.1306	0.043985	0.40114	-3.9455	IDI2-AS1	IDI2 antisense RNA 1
29018	1.2071	2.956	2.1299	0.044046	0.40148	-3.9467	FOXN3-AS2	FOXN3 antisense RNA 2
360023	-1.8225	4.2101	-2.1294	0.044091	0.40162	-3.9475	ZBTB41	zinc finger and BTB domain containing 41
9133	1.0866	7.9136	2.1293	0.044107	0.40162	-3.9478	CCNB2	cyclin B2
54700	-1.4406	5.8545	-2.1287	0.044157	0.40172	-3.9487	RRN3	"RRN3 homolog, RNA polymerase I transcription factor"
157273	-1.5949	5.6058	-2.1286	0.044164	0.40172	-3.9489	LOC157273	uncharacterized LOC157273
337963	-1.3021	7.7949	-2.1282	0.044209	0.40183	-3.9497	KRTAP23-1	keratin associated protein 23-1
120526	-1.6769	5.1335	-2.1277	0.044246	0.40183	-3.9504	DNAJC24	DnaJ heat shock protein family (Hsp40) member C24
92086	1.4743	10.177	2.1274	0.044273	0.40183	-3.9509	GGTLC1	gamma-glutamyltransferase light chain 1
51602	-1.3203	10.002	-2.1272	0.044299	0.40183	-3.9514	NOP58	NOP58 ribonucleoprotein
57089	2.0262	5.519	2.1271	0.044305	0.40183	-3.9515	ENTPD7	ectonucleoside triphosphate diphosphohydrolase 7
11096	-1.2047	3.5875	-2.1267	0.044338	0.40183	-3.9521	ADAMTS5	ADAM metallopeptidase with thrombospondin type 1 motif 5
220074	1.1922	6.1547	2.1265	0.044362	0.40183	-3.9526	LRTOMT	leucine rich transmembrane and O-methyltransferase domain containing
57213	-1.3001	3.1921	-2.1265	0.044362	0.40183	-3.9526	SPRYD7	SPRY domain containing 7
85495	1.5203	10.125	2.1257	0.04443	0.40216	-3.9538	RPPH1	ribonuclease P RNA component H1
4356	-1.6113	6.583	-2.1255	0.044451	0.40216	-3.9542	MPP3	membrane palmitoylated protein 3
84304	1.0987	11.905	2.1253	0.044468	0.40216	-3.9546	NUDT22	nudix hydrolase 22
146050	-1.4087	7.3753	-2.1246	0.044536	0.40257	-3.9558	ZSCAN29	zinc finger and SCAN domain containing 29
51338	3.5762	9.5135	2.1242	0.04457	0.40266	-3.9565	MS4A4A	membrane spanning 4-domains A4A
9489	1.2072	9.1006	2.1229	0.044687	0.40351	-3.9586	PGS1	phosphatidylglycerophosphate synthase 1
51537	-1.5069	6.1789	-2.1226	0.044719	0.40351	-3.9592	MTFP1	mitochondrial fission process 1
79827	1.0925	5.0028	2.1223	0.044746	0.40351	-3.9597	CLMP	CXADR like membrane protein
6940	1.8885	9.4007	2.1221	0.044761	0.40351	-3.96	ZNF354A	zinc finger protein 354A
23129	-1.5298	6.8267	-2.1219	0.044782	0.40351	-3.9604	PLXND1	plexin D1
1397	-1.1987	4.1458	-2.1216	0.044813	0.40351	-3.961	CRIP2	cysteine rich protein 2
122740	1.4934	3.68	2.1214	0.044827	0.40351	-3.9612	OR4K14	olfactory receptor family 4 subfamily K member 14
127733	1.388	3.4592	2.1209	0.044873	0.40372	-3.9621	UBXN10	UBX domain protein 10
84662	1.7525	4.5078	2.1197	0.044982	0.40383	-3.9641	GLIS2	GLIS family zinc finger 2
118670	-1.4205	4.0901	-2.1197	0.044988	0.40383	-3.9642	FAM24A	family with sequence similarity 24 member A
54538	1.2161	2.798	2.1197	0.04499	0.40383	-3.9642	ROBO4	roundabout guidance receptor 4
2242	1.2477	11.618	2.1197	0.04499	0.40383	-3.9642	FES	"FES proto-oncogene, tyrosine kinase"
7130	1.6782	13.697	2.1193	0.045024	0.40383	-3.9648	TNFAIP6	TNF alpha induced protein 6
128646	1.2152	9.834	2.1192	0.045031	0.40383	-3.965	SIRPD	signal regulatory protein delta
3902	-2.2668	6.9718	-2.119	0.045048	0.40383	-3.9653	LAG3	lymphocyte activating 3
200132	1.0779	2.7415	2.1184	0.045103	0.40411	-3.9663	TCTEX1D1	Tctex1 domain containing 1
593	1.1823	9.1252	2.117	0.045239	0.40436	-3.9688	BCKDHA	branched chain keto acid dehydrogenase E1 subunit alpha
6286	1.628	17.383	2.1169	0.045244	0.40436	-3.9689	S100P	S100 calcium binding protein P
22973	-1.6251	6.6931	-2.1169	0.045244	0.40436	-3.9689	LAMB2P1	laminin subunit beta 2 pseudogene 1
1123	-1.3944	3.8157	-2.1168	0.045258	0.40436	-3.9691	CHN1	chimerin 1
84313	1.169	10.518	2.1167	0.045265	0.40436	-3.9693	VPS25	vacuolar protein sorting 25 homolog
26231	0.98913	4.0466	2.1164	0.045289	0.40436	-3.9697	LRRC29	leucine rich repeat containing 29
284805	1.1509	3.0088	2.1164	0.045294	0.40436	-3.9698	C20orf203	chromosome 20 open reading frame 203
51018	-1.5051	4.6583	-2.1161	0.045324	0.40442	-3.9704	RRP15	ribosomal RNA processing 15 homolog
100130418	-1.4464	6.6519	-2.1152	0.045402	0.40464	-3.9718	CECR7	"cat eye syndrome chromosome region, candidate 7"
754	1.2184	13.201	2.115	0.045421	0.40464	-3.9721	PTTG1IP	PTTG1 interacting protein
7379	1.058	3.0087	2.115	0.045428	0.40464	-3.9723	UPK2	uroplakin 2
219402	1.2367	12.065	2.1148	0.045442	0.40464	-3.9725	MTIF3	mitochondrial translational initiation factor 3
116843	-1.1905	7.887	-2.1145	0.045474	0.40471	-3.9731	SLC18B1	solute carrier family 18 member B1
22905	-1.1784	7.9796	-2.114	0.04552	0.40492	-3.9739	EPN2	epsin 2
7181	-1.7136	4.7952	-2.113	0.045607	0.40529	-3.9755	NR2C1	nuclear receptor subfamily 2 group C member 1
90410	1.0703	10.371	2.113	0.045609	0.40529	-3.9755	IFT20	intraflagellar transport 20
83891	-1.6511	4.687	-2.1127	0.045636	0.40533	-3.976	SNX25	sorting nexin 25
63036	0.96302	6.7227	2.1124	0.045663	0.40536	-3.9765	CELA2A	chymotrypsin like elastase 2A
7267	-1.8737	6.6188	-2.1117	0.045734	0.40578	-3.9778	TTC3	tetratricopeptide repeat domain 3
55450	-1.4283	5.1793	-2.1107	0.045831	0.40604	-3.9795	CAMK2N1	calcium/calmodulin dependent protein kinase II inhibitor 1
51734	1.4224	16.009	2.1106	0.04584	0.40604	-3.9797	MSRB1	methionine sulfoxide reductase B1
125931	1.2281	8.5333	2.1105	0.045843	0.40604	-3.9798	CEACAM20	CEA cell adhesion molecule 20
339559	-1.2107	4.9155	-2.1101	0.045888	0.40604	-3.9806	ZFP69	ZFP69 zinc finger protein
55259	1.2565	3.5655	2.1099	0.045903	0.40604	-3.9809	CASC1	cancer susceptibility 1
115004	1.1878	9.2876	2.1097	0.045922	0.40604	-3.9812	CGAS	cyclic GMP-AMP synthase
79747	-1.6717	5.2322	-2.1096	0.045927	0.40604	-3.9813	ADGB	androglobin
136263	1.1135	2.4918	2.1093	0.045962	0.40611	-3.9819	SSMEM1	serine rich single-pass membrane protein 1
343263	1.1796	6.6466	2.109	0.04599	0.40611	-3.9824	MYBPHL	myosin binding protein H like
7334	-1.2357	7.3927	-2.1085	0.046038	0.40611	-3.9833	UBE2N	ubiquitin conjugating enzyme E2 N
91703	-1.2368	4.6149	-2.1083	0.046051	0.40611	-3.9835	ACY3	aminoacylase 3
692058	-1.5234	6.9915	-2.1078	0.046104	0.40611	-3.9845	SNORD11	"small nucleolar RNA, C/D box 11"
54865	-1.3022	5.1904	-2.1073	0.046153	0.40611	-3.9853	GPATCH4	G-patch domain containing 4
222662	-1.401	7.4489	-2.1069	0.04619	0.40611	-3.986	LHFPL5	LHFPL tetraspan subfamily member 5
4675	-1.3113	2.9925	-2.1067	0.046209	0.40611	-3.9864	NAP1L3	nucleosome assembly protein 1 like 3
2984	1.2658	3.2922	2.1066	0.046211	0.40611	-3.9864	GUCY2C	guanylate cyclase 2C
200830	-0.99508	9.1886	-2.1063	0.04624	0.40611	-3.9869	200830	NA
51208	1.5282	3.3433	2.1063	0.046244	0.40611	-3.987	CLDN18	claudin 18
400322	-1.8724	6.6328	-2.1061	0.04626	0.40611	-3.9873	HERC2P2	hect domain and RLD 2 pseudogene 2
94015	-1.3585	4.71	-2.1061	0.046262	0.40611	-3.9873	TTYH2	tweety family member 2
317772	1.5888	15.441	2.1061	0.046263	0.40611	-3.9873	H2AC21	H2A clustered histone 21
65981	-1.0823	7.7117	-2.1055	0.046316	0.40637	-3.9883	CAPRIN2	caprin family member 2
220929	1.2709	13.426	2.1049	0.04638	0.40673	-3.9894	ZNF438	zinc finger protein 438
9332	2.6979	12.011	2.1041	0.046455	0.40718	-3.9907	CD163	CD163 molecule
100874212	1.2828	3.0722	2.1031	0.046553	0.40782	-3.9925	MYCBP2-AS1	MYCBP2 antisense RNA 1
100630918	1.2104	7.1632	2.1028	0.046575	0.40782	-3.9929	PARTICL	promoter of MAT2A antisense radiation-induced circulating long non-coding RNA
9663	-1.3166	11.246	-2.1023	0.046629	0.40808	-3.9938	LPIN2	lipin 2
3384	-1.3762	10.662	-2.1011	0.046741	0.40886	-3.9958	ICAM2	intercellular adhesion molecule 2
2358	1.3293	13.831	2.1	0.04685	0.40914	-3.9977	FPR2	formyl peptide receptor 2
56952	-1.25	3.1612	-2.0998	0.046861	0.40914	-3.9979	PRTFDC1	phosphoribosyl transferase domain containing 1
5129	-1.3796	4.1838	-2.0997	0.046876	0.40914	-3.9982	CDK18	cyclin dependent kinase 18
875	1.437	11.195	2.0997	0.04688	0.40914	-3.9983	CBS	cystathionine beta-synthase
55511	1.0687	3.2288	2.0995	0.04689	0.40914	-3.9985	SAGE1	sarcoma antigen 1
10385	-1.3059	7.3829	-2.0986	0.046977	0.4092	-4	BTN2A2	butyrophilin subfamily 2 member A2
65250	-1.2012	6.0155	-2.0985	0.046992	0.4092	-4.0002	CPLANE1	ciliogenesis and planar polarity effector 1
26689	1.3777	2.6081	2.0983	0.04701	0.4092	-4.0006	OR4D1	olfactory receptor family 4 subfamily D member 1
3783	-1.2289	7.4383	-2.0983	0.047012	0.4092	-4.0006	KCNN4	potassium calcium-activated channel subfamily N member 4
79635	1.0954	4.5295	2.0982	0.04702	0.4092	-4.0007	CCDC121	coiled-coil domain containing 121
63901	-1.9042	8.1564	-2.0977	0.047068	0.4092	-4.0016	FAM111A	family with sequence similarity 111 member A
10609	-1.3552	4.7145	-2.0972	0.047119	0.4092	-4.0025	P3H4	prolyl 3-hydroxylase family member 4 (inactive)
400046	1.0717	4.1256	2.0969	0.047143	0.4092	-4.0029	LINC02389	long intergenic non-protein coding RNA 2389
9699	1.0954	3.2498	2.0969	0.047146	0.4092	-4.0029	RIMS2	regulating synaptic membrane exocytosis 2
9294	-1.2389	6.2872	-2.0967	0.047164	0.4092	-4.0033	S1PR2	sphingosine-1-phosphate receptor 2
283219	1.1633	9.3681	2.0965	0.047183	0.4092	-4.0036	KCTD21	potassium channel tetramerization domain containing 21
[truncated: 15,347 more rows]

## Sheet: logFC
Symbols	logFC
RSAD2	-5.3828
TRIM58	-4.5784
CAVIN2	-4.3606
FCER1A	-4.3427
TUBB1	-4.2585
PRKAR2B	-4.2526
IFI44L	-4.2396
MYBL1	-4.1576
IFI44	-4.1481
XAF1	-4.0981
RORA	-4.0835
CXCR2P1	-4.0754
IFIT1	-4.0507
XK	-4.0382
HEMGN	-3.9605
PF4V1	-3.9104
HERC5	-3.9006
CMPK2	-3.8402
SMPD3	-3.8337
SNCA	-3.832
ADGRG1	-3.7217
CD2AP	-3.7169
SRSF8	-3.6868
PYHIN1	-3.6773
ITK	-3.6583
C2orf88	-3.6165
ALDH5A1	-3.615
TENT5C	-3.6078
OAS1	-3.5492
GNG11	-3.5007
DMTN	-3.4998
FAM102A	-3.4943
CD69	-3.4939
TMOD1	-3.486
XCL1	-3.4741
RBPMS2	-3.4622
RNF144A	-3.4424
IL2RB	-3.3995
IFI27	-3.394
HERC6	-3.368
SBK1	-3.3609
GZMH	-3.3309
B3GAT1	-3.3299
RIN2	-3.3164
ZNF204P	-3.2811
ANKH	-3.2728
LAMP3	-3.2661
NT5M	-3.2616
LRATD2	-3.2598
MAP4K5	-3.2469
RGS1	-3.233
CD96	-3.2169
GZMB	-3.1904
TAL1	-3.1788
FGFBP2	-3.1407
EOMES	-3.1391
SIGLEC1	-3.1389
KLRG1	-3.1307
PBX1	-3.1152
TC2N	-3.0867
NPRL3	-3.0863
PRKX	-3.0841
TSPAN5	-3.0781
PNPT1	-3.0773
USP18	-3.0771
SLC25A38	-3.0745
SPX	-3.0593
SLC25A39	-3.059
KLRK1	-3.0574
DNAJC6	-3.0557
100129399	-3.0501
KLRD1	-3.0477
LGALS2	-3.0462
CD5	-3.0353
GNAZ	-3.0263
CD247	-3.0154
DPP4	-3.0061
AGRN	-2.9974
CD3G	-2.9808
GZMK	-2.9803
100130920	-2.9796
S1PR5	-2.9769
KRT1	-2.9766
SAMD3	-2.9734
3126	-2.9659
GZMA	-2.9582
KLRC3	-2.9574
JAM3	-2.9554
GMPR	-2.9548
KIF5C	-2.9547
286058	-2.9474
DENND11	-2.9299
BFSP1	-2.9263
SKAP1	-2.9251
ABCC4	-2.9248
A2M-AS1	-2.9126
DDX60	-2.9034
PTGDR2	-2.8979
GCLC	-2.8924
THEMIS	-2.8908
HOXB2	-2.882
GNLY	-2.8763
PRKCQ	-2.8749
LINC00892	-2.8725
TRAT1	-2.8644
ANO8	-2.8622
ISG15	-2.8611
SELENOI	-2.8593
STK39	-2.8555
RFTN1	-2.8518
RASGRP3	-2.851
OPTN	-2.8466
CACNG6	-2.846
RNF182	-2.8421
HSPB1	-2.8373
KLRF1	-2.8288
WDR86-AS1	-2.8268
PLEK2	-2.8245
TRMT11	-2.8214
LY6E	-2.8093
NDFIP2	-2.8086
JAKMIP1	-2.7923
SPON2	-2.7887
LEF1	-2.7832
ELOVL7	-2.7828
CALD1	-2.7758
KLF12	-2.7741
PTCRA	-2.7697
CRYBG3	-2.7695
KLRB1	-2.7657
CCL5	-2.7546
APOL6	-2.7526
TBX21	-2.7509
MAL	-2.7465
FAXDC2	-2.745
MTR	-2.7441
OAS2	-2.7403
PDZK1IP1	-2.7339
PARP12	-2.7335
MAP3K7CL	-2.73
KCTD15	-2.7255
SLC14A1	-2.7233
KIAA0895L	-2.7187
TSPYL2	-2.7109
ZNF831	-2.7075
IL7R	-2.6998
SP140L	-2.6978
KLRC1	-2.6928
GFPT2	-2.6912
PTPRM	-2.6833
IFIT5	-2.6824
OAS3	-2.6737
TFAP2A	-2.6737
TMEM158	-2.6714
HES4	-2.6701
CTTN	-2.6697
ANO6	-2.6601
TTTY15	-2.66
SLC29A1	-2.6561
SYNM	-2.6561
HLA-DMB	-2.6448
ZNF683	-2.635
ACSL6	-2.6288
PTPN4	-2.6232
WASF3	-2.6221
MMD	-2.6202
NIPA1	-2.616
TTC7B	-2.6159
RTL6	-2.6132
KLHL3	-2.6102
PPBP	-2.6086
NRGN	-2.6069
MYZAP	-2.6045
GBP1	-2.6007
THEM5	-2.592
LAMA3	-2.5914
ADGRE4P	-2.5911
NR3C2	-2.5909
TPPP	-2.5894
SOCS2	-2.5893
BCL11B	-2.5833
MOV10	-2.5818
PLEKHA1	-2.5787
MX1	-2.5761
SYTL2	-2.5748
SEPTIN11	-2.5721
ALOX12	-2.5717
ADCY9	-2.5707
TNFRSF25	-2.5695
MDFIC	-2.5692
CD6	-2.5623
ITM2A	-2.561
SH3BGRL2	-2.5524
ITLN1	-2.5397
FGL2	-2.5354
MBNL2	-2.5335
CDC25B	-2.5226
HEG1	-2.5178
MLH3	-2.5163
BEX3	-2.5118
PCGF5	-2.5105
ZNF23	-2.5081
EVL	-2.508
STAP1	-2.5011
HDC	-2.5006
ITGB3	-2.4991
IL4	-2.4982
RHOBTB3	-2.4962
THSD1	-2.4883
GREM2	-2.4853
GSPT1	-2.4847
CD2	-2.4816
USP46	-2.4634
RTP4	-2.4569
PARP14	-2.4501
ZNF121	-2.4493
C1orf21	-2.4493
SPECC1	-2.449
CACNA2D2	-2.4429
ASB2	-2.4428
MIR4697HG	-2.4393
ERAP2	-2.4379
ANKRD9	-2.4377
ETV7	-2.4342
PLXNA1	-2.4298
RTTN	-2.4273
DLG3	-2.4268
EPSTI1	-2.4233
SNRPN	-2.4157
GVINP1	-2.4135
NUP205	-2.4035
MATK	-2.4025
CD40LG	-2.4004
TGFBR3	-2.4001
NR4A1	-2.399
CASP7	-2.3972
PRKACB	-2.3944
PAGE2	-2.3835
ZXDB	-2.3797
DTHD1	-2.3793
SNORD64	-2.378
KIAA1324L	-2.3721
FECH	-2.3721
ARHGAP6	-2.37
PRSS23	-2.3699
NT5C1A	-2.3673
RUFY3	-2.3626
TRUB1	-2.3604
STRADB	-2.3596
PITPNM2	-2.3584
SMOX	-2.357
GATA1	-2.3556
DNM3	-2.3497
SLC4A4	-2.3461
PPM1K	-2.3427
SLC7A1	-2.3426
LPAR6	-2.3415
ZNF528	-2.3407
CLIP4	-2.3375
GSPT2	-2.3359
C12orf75	-2.3299
XPO4	-2.3232
ZNF783	-2.3229
HLA-DPB1	-2.3228
PDGFD	-2.322
FASLG	-2.3165
ACTR5	-2.3159
IFIT2	-2.3111
KLRC4	-2.311
PLEKHA8	-2.311
BACH2	-2.3067
ARHGEF10L	-2.3036
PRR5	-2.296
TARBP1	-2.2947
BMPR2	-2.293
USP9Y	-2.2917
ARHGAP10	-2.2901
TGFBI	-2.2901
RASGRP1	-2.2891
LIPC	-2.2867
DIRC3	-2.286
GAS2L1P2	-2.2844
LAP3	-2.2842
TRAK2	-2.2822
TXK	-2.2789
EPHA4	-2.2787
ABHD15	-2.2721
LAG3	-2.2668
GPRASP1	-2.2664
HABP4	-2.2637
SASH1	-2.2609
PID1	-2.2608
HLA-DQA1	-2.2542
LTBP1	-2.2533
ZNF208	-2.2533
SPN	-2.2529
PWAR6	-2.251
FBXL16	-2.2507
GUCY1B1	-2.2452
APOBEC3C	-2.2398
TBC1D4	-2.2398
PAGE2B	-2.2375
SLC45A3	-2.2345
PTPN13	-2.2339
ZNHIT6	-2.2295
FAM153B	-2.2287
LDLRAP1	-2.2264
TARS3	-2.226
NEXN	-2.2245
DAGLA	-2.219
CLSTN1	-2.2164
GPR68	-2.2138
ZNF736	-2.2064
APOL3	-2.2044
TLE5	-2.2006
HSPH1	-2.1969
SSB	-2.1918
PARP15	-2.1911
GATA3	-2.1908
WDR11-AS1	-2.19
PACS2	-2.1884
BTN3A2	-2.185
SMIM5	-2.1778
BACE2	-2.1775
PRR5L	-2.1739
TNFRSF4	-2.1736
ITGB7	-2.1734
CAPN2	-2.1671
C3orf18	-2.1626
FKBP1B	-2.1609
PVRIG	-2.1594
CAPN5	-2.158
RGS10	-2.1573
ITPR3	-2.1545
TMEM268	-2.1544
FAM20B	-2.1537
HLA-DRB5	-2.1479
IGF2BP2	-2.143
CCL28	-2.1378
LBH	-2.1355
PRF1	-2.1329
DNMT1	-2.1268
ANK1	-2.1264
ANKRD36	-2.1254
ACAD11	-2.1246
TCF3	-2.122
BBOF1	-2.1218
TCF7	-2.1196
CCR7	-2.1193
AP3M2	-2.1172
MCUB	-2.1139
F13A1	-2.1138
P2RX7	-2.1134
SCFD2	-2.1128
RPS6KA5	-2.1089
ZNF571	-2.1062
SAMD9	-2.1046
SLC41A1	-2.1037
PWARSN	-2.1021
LINC00381	-2.0983
BANK1	-2.0975
ZAP70	-2.0963
FAM153CP	-2.0962
CEP78	-2.0926
CDK6	-2.0923
TMEM181	-2.0916
SLFN13	-2.089
TAMM41	-2.0881
POLR3E	-2.0842
TRAF5	-2.0833
CROCCP3	-2.0824
CMKLR1	-2.0793
CROT	-2.0749
ZC3H7B	-2.07
PTGDS	-2.0679
ARHGEF12	-2.066
GPA33	-2.0649
PLEKHA5	-2.0647
RADX	-2.0634
100130916	-2.0565
CASP17P	-2.0563
246734	-2.0558
LRBA	-2.0558
GNA12	-2.0556
KIFAP3	-2.0555
USP12	-2.0555
CBR3	-2.0551
UBE2O	-2.0551
HRAT92	-2.0549
HEATR5B	-2.0543
CCDC65	-2.0499
100507486	-2.0478
PRKCQ-AS1	-2.0478
SIDT1	-2.0473
GPR55	-2.0378
254057	-2.0365
UBFD1	-2.0345
TIAM1	-2.0324
NMUR1	-2.0276
OR2W3	-2.0272
79904	-2.027
PF4	-2.0264
MTMR11	-2.0245
RNF125	-2.0218
FYN	-2.0212
ZBTB42	-2.02
SNORD72	-2.02
COQ10A	-2.0195
TXLNGY	-2.0174
ALG9	-2.0171
CIITA	-2.0142
NOD1	-2.0133
TRPC1	-2.0113
FNBP1L	-2.0097
ZNF286B	-2.0093
CRTAM	-2.0083
HLA-DRA	-2.0073
CBLB	-2.0071
CD8A	-2.0039
NID1	-2.0028
APBA2	-2.0021
MORC4	-2.002
ACSF2	-1.9999
TBC1D19	-1.9994
NCBP2	-1.9976
ICOS	-1.9973
HERC3	-1.9938
SPOCD1	-1.9922
LIPA	-1.9903
RGCC	-1.9897
PLAAT4	-1.9888
ZBTB39	-1.9887
CD3D	-1.9876
EXOSC9	-1.987
TMEM51	-1.9869
NF2	-1.985
PIK3C2B	-1.9814
PRKAB2	-1.9806
IL5RA	-1.9795
C22orf34	-1.978
CALHM2	-1.9779
SLC23A2	-1.9778
ATP10A	-1.9777
ZNF708	-1.9776
ODC1	-1.9754
DPYD-AS1	-1.975
TTC39B	-1.9748
SCARB2	-1.9741
PMP22	-1.9737
OSBPL5	-1.9655
STAT2	-1.9598
GBP3	-1.9586
IPO9	-1.9567
ADARB1	-1.9565
PLXNB2	-1.9545
NCAM1	-1.9533
CRY1	-1.9513
NAP1L5	-1.951
MRAS	-1.948
EEF2K	-1.9478
ZCCHC2	-1.9459
RHOBTB1	-1.9432
ZBTB4	-1.9424
IDO1	-1.942
TYW3	-1.9418
DNAJC15	-1.9377
SMAD3	-1.9373
DNAJA4	-1.9334
IFI6	-1.9288
VPS13C	-1.9275
EPB41	-1.9232
GRHL1	-1.9223
MLLT3	-1.9223
AHNAK	-1.9212
MID2	-1.9201
ABCB10	-1.9189
UTY	-1.9175
PI16	-1.9165
LRP12	-1.9146
EGR3	-1.9145
DHX58	-1.9101
HLA-DPA1	-1.9101
MYLK	-1.9086
CA2	-1.9083
MMAB	-1.9066
ZNF573	-1.9065
PEPD	-1.9059
285628	-1.9056
FAM111A	-1.9042
RORC	-1.9027
MTSS1	-1.9021
LIMA1	-1.9009
HLA-DRB1	-1.8968
P2RY2	-1.8951
CTLA4	-1.8941
ALMS1P1	-1.8937
ZSCAN26	-1.8931
ZNF676	-1.8909
CXCR5	-1.8887
IKZF3	-1.8862
CYP4V2	-1.8849
TBCEL	-1.8836
ST6GAL1	-1.8817
LGALS12	-1.8796
DDX10	-1.8762
GBP5	-1.8761
SC5D	-1.8751
TTC3	-1.8737
HERC2P2	-1.8724
ZFP1	-1.8692
PACC1	-1.8662
SP140	-1.8647
ZNF29P	-1.8618
LDOC1	-1.8579
NAA25	-1.8558
B4GAT1	-1.8552
P2RY10	-1.8511
FAM124B	-1.8484
RAP2A	-1.8476
MALT1	-1.8426
CCL2	-1.8404
TMEM176B	-1.8358
CAMK4	-1.8352
100129637	-1.8337
TCERG1	-1.8327
ADHFE1	-1.8326
ENO2	-1.8323
AGPAT5	-1.8321
MAP9	-1.8289
MYO1D	-1.8287
TREML1	-1.8283
ANK3	-1.8282
ITGA4	-1.8281
RNASEH2B-AS1	-1.8232
ZBTB41	-1.8225
URI1	-1.8214
EPHX2	-1.8189
TMEM263	-1.8168
OSBPL7	-1.816
MAP4K3	-1.8156
ZNF737	-1.815
TMEM245	-1.8147
TTC25	-1.8138
NR1D2	-1.8074
ZNF618	-1.8065
TRMT61B	-1.8056
MCOLN2	-1.8055
ASAP2	-1.8036
RUNX3	-1.8004
CD244	-1.7985
NUDT9P1	-1.7933
ZNF354B	-1.7929
PHTF2	-1.7914
MS4A1	-1.7893
CACNB4	-1.7892
SLC25A22	-1.7884
IKZF2	-1.788
NAP1L1	-1.7869
CATSPER2	-1.7868
100128298	-1.7866
MCCC1	-1.7863
283588	-1.7829
SNX22	-1.7801
100130938	-1.7798
CENPV	-1.7785
SH2D1A	-1.7765
NAA15	-1.7748
VXN	-1.774
DGLUCY	-1.7735
DMRTC1	-1.7733
HIC2	-1.7684
CYB561	-1.7673
WDR18	-1.7664
THEM4	-1.7663
USP25	-1.7645
OXTR	-1.7637
DOK2	-1.7633
LANCL1	-1.7607
METTL4	-1.7598
PARP11	-1.7554
PHLPP2	-1.7553
SS18L1	-1.7541
ZNF235	-1.7528
UBE2Q2	-1.7527
OSBP2	-1.7526
BDH1	-1.7522
ESYT1	-1.7493
FZD6	-1.749
DCK	-1.7489
APOBEC3F	-1.7469
ZNF883	-1.746
TMEM267	-1.7457
EFNB1	-1.7437
GPR171	-1.7435
WDR3	-1.7421
TIMM10	-1.7413
RCAN3	-1.7407
100131262	-1.7402
CLIC3	-1.7392
SLC35B4	-1.7371
IQCG	-1.7369
FAM3C	-1.7364
RAB15	-1.7362
SAMHD1	-1.7361
B3GALT2	-1.7361
UCKL1	-1.7344
TRIM14	-1.7339
GGA2	-1.7323
NUP160	-1.7322
DDX58	-1.7291
PANX1	-1.7289
MS4A7	-1.7288
SCRN1	-1.7279
TCEA3	-1.7212
GALNT6	-1.7207
PRIMA1	-1.7193
FANCL	-1.7187
BNIP5	-1.7181
LHFPL2	-1.7174
ZNF540	-1.7167
SGCB	-1.7165
FBXO41	-1.7161
PCCA	-1.7154
LINC00691	-1.7147
NR2C1	-1.7136
TLR7	-1.7124
TUBB2A	-1.7123
ABLIM1	-1.7087
CBR1	-1.7061
GPD1L	-1.7051
KRT27	-1.7043
SIPA1L3	-1.7035
TENT4A	-1.7026
TSPOAP1	-1.7013
ZNF559	-1.7008
SUN1	-1.6998
PRSS42P	-1.6997
PTER	-1.6994
KCNA2	-1.6992
ENDOD1	-1.6966
PPP3CC	-1.6958
FAM169A	-1.6945
GBP4	-1.6942
SCUBE3	-1.6899
TMEM123	-1.6892
RNH1	-1.6868
CD99	-1.6845
GSDMB	-1.6837
IPO5	-1.6833
TRANK1	-1.682
ZNF337	-1.682
SLC4A7	-1.6807
BST2	-1.6798
FRMD3	-1.6796
RNASEH2B	-1.6793
MPP6	-1.6783
AGFG2	-1.677
DNAJC24	-1.6769
RGS9	-1.6764
THOC1	-1.6751
POGLUT3	-1.6748
PREPL	-1.6745
LOC100131289	-1.6733
AKAP1	-1.6726
PBX4	-1.6725
ZDBF2	-1.6718
ADGB	-1.6717
ANKFY1	-1.6715
CCDC6	-1.6704
GPR78	-1.6696
THSD7B	-1.6687
NDC80	-1.6673
ZMYM4	-1.6666
TMEM156	-1.6666
TTC27	-1.6643
ST6GALNAC6	-1.6638
NAT10	-1.6634
TPBG	-1.6629
LOC441666	-1.6627
AKAP11	-1.6625
LAMP5	-1.6604
MAF	-1.6602
CD81	-1.6598
INTS2	-1.6595
USP28	-1.6586
DPCD	-1.6584
C15orf61	-1.6578
NCEH1	-1.6547
TSTD2	-1.6527
EMP1	-1.6521
SNX25	-1.6511
EPHX4	-1.6483
ZNF165	-1.6466
PRAG1	-1.6464
KIAA0408	-1.6461
LOC100130691	-1.6455
ZNF251	-1.645
ARMCX1	-1.6447
DPY19L1	-1.6439
FANCC	-1.6435
100130428	-1.6424
TSHZ2	-1.642
CCT6B	-1.6389
LOC155060	-1.6367
PPP1R26	-1.6359
CUZD1	-1.6353
ZPBP	-1.6352
CCDC180	-1.633
ADAMTS10	-1.6329
PTGS1	-1.6324
BEX5	-1.6323
HCG25	-1.6322
TIGIT	-1.6304
RCC2	-1.63
DHRS3	-1.6283
LAMB2P1	-1.6251
HSH2D	-1.6236
PTGIR	-1.6232
SORD	-1.6226
GP6	-1.6185
HEATR9	-1.6159
PLAAT1	-1.6148
TRIB2	-1.6143
MPP3	-1.6113
LZTFL1	-1.6077
PCNX2	-1.6075
GPRASP2	-1.6074
ACP1	-1.6071
BAG3	-1.606
ABCB1	-1.6041
USP14	-1.6037
ECSIT	-1.6003
CMTR1	-1.5999
IL12RB2	-1.5985
TRIM68	-1.5973
NR4A3	-1.5968
PURA	-1.5963
ABLIM3	-1.5962
ZNF823	-1.596
LOC157273	-1.5949
GSE1	-1.5927
UPF3A	-1.5902
SNHG20	-1.5891
CWF19L2	-1.5887
FAM122C	-1.587
USP45	-1.5858
SLC25A43	-1.5848
SUGT1P3	-1.5843
RIC8B	-1.5836
LOC653160	-1.5832
RAB27B	-1.5828
FAM98B	-1.582
286367	-1.582
TRG-AS1	-1.5797
CCDC146	-1.5797
ZNF30	-1.5769
NKAIN3-IT1	-1.5754
CCDC14	-1.5748
GPR174	-1.5743
ZNF14	-1.5715
ETS1	-1.5698
ST3GAL5	-1.5681
SPIB	-1.5664
DCP1B	-1.5655
TASOR2	-1.5619
GUCY1A1	-1.5605
SPON1	-1.5591
TREX1	-1.5582
TSC22D1	-1.5571
ACRBP	-1.5568
NTN4	-1.5562
BCL2	-1.556
IL20RB	-1.5538
CD27	-1.5538
ZNF92	-1.5534
84786	-1.5523
LINC01951	-1.548
ZNF512B	-1.5467
NOC3L	-1.5464
ABCD2	-1.5461
FLT3LG	-1.5439
STMP1	-1.5439
HEBP1	-1.5415
TBC1D29P	-1.5414
TMEM30B	-1.5411
AARS2	-1.54
RMDN3	-1.5397
INPP4B	-1.5389
CAPS2	-1.5381
TBC1D31	-1.5361
PLXND1	-1.5298
ZNF740	-1.5297
WDR89	-1.5282
ULK2	-1.5272
ERRFI1	-1.5268
ZMYND11	-1.5256
SMC2	-1.5247
ZNF347	-1.524
SNORD11	-1.5234
SPATA22	-1.5229
ARVCF	-1.5228
IFFO2	-1.5222
B3GNT6	-1.5213
LOXL2	-1.5206
GRB14	-1.5184
PPT2	-1.5183
DHX33	-1.5141
SSBP3	-1.5113
AEN	-1.5104
LLGL2	-1.5099
GNGT2	-1.5095
PIWIL2	-1.5082
POLR1C	-1.508
FBXO21	-1.507
MTFP1	-1.5069
RRP15	-1.5051
PACSIN1	-1.5029
SPART	-1.5022
NFIA	-1.5021
CD200R1	-1.5012
C15orf41	-1.5009
TAS2R30	-1.5002
HLF	-1.4983
LINC00426	-1.4979
LOC285097	-1.4974
ZC4H2	-1.4964
OXNAD1	-1.496
DUSP6	-1.4956
ITGA6	-1.4945
NEFL	-1.4944
MTAP	-1.4939
SNX24	-1.4939
SEC14L5	-1.4937
CHD6	-1.4934
PEX2	-1.4928
ZNF248	-1.4922
HCRT	-1.4904
DPY19L2P2	-1.4899
ACO1	-1.4884
SPOCK2	-1.4848
SH2D2A	-1.4765
ALOX15P1	-1.4764
PPARA	-1.4677
NUP93	-1.4676
PNMA5	-1.4671
TAF9B	-1.467
ZNF124	-1.465
SMYD2	-1.4649
TMEM176A	-1.4638
AUTS2	-1.4625
KPNA5	-1.4624
DDHD2	-1.4619
TARP	-1.4602
AMOT	-1.4602
TPCN1	-1.4597
PLEKHB1	-1.4589
CMPK1	-1.4585
CNTNAP2	-1.4585
NMT2	-1.4585
OR4C3	-1.4578
CROCCP2	-1.4575
GPR180	-1.4568
QSOX2	-1.4548
ZFP90	-1.4537
MINAR1	-1.4528
ERP44	-1.4483
ZNF732	-1.4482
PLEKHH1	-1.4482
NDUFA5	-1.4468
CECR7	-1.4464
TBC1D22B	-1.4456
DCUN1D4	-1.4452
ZC2HC1A	-1.4428
LPAR5	-1.4421
RRN3	-1.4406
RAI14	-1.4404
ZNF430	-1.4395
ZNF479	-1.4387
USPL1	-1.4386
PRKY	-1.4385
ENTPD6	-1.4385
TCP10L2	-1.438
UST	-1.4367
DROSHA	-1.4361
FAM117B	-1.435
KIAA0355	-1.4342
ABHD10	-1.4341
ZFYVE28	-1.4339
PITHD1	-1.4333
ITGB8	-1.4326
LRRC32	-1.4317
283713	-1.4316
100128242	-1.4314
SLC66A3	-1.431
SAPCD1	-1.431
TMEM204	-1.4284
CAMK2N1	-1.4283
OR8D1	-1.428
RABGAP1L	-1.426
LMTK3	-1.4256
TTC21A	-1.4251
CNR2	-1.4231
FAM24A	-1.4205
TMEM170B	-1.418
LGR6	-1.4162
UBQLNL	-1.415
ERCC8	-1.4146
FAM122B	-1.4144
FAN1	-1.4123
ZNF875	-1.4117
OR10A4	-1.411
RAB11FIP3	-1.4109
100127972	-1.4096
PPP1R12B	-1.4088
ZSCAN29	-1.4087
SPNS3	-1.4085
GLS	-1.4079
CEP290	-1.4078
P2RY12	-1.4064
CALM1	-1.4049
CCDC88C	-1.404
PAN2	-1.403
SSR4P1	-1.4028
SRFBP1	-1.4021
LHFPL5	-1.401
RNF138P1	-1.3975
RNF114	-1.3951
CHN1	-1.3944
ME3	-1.3937
ZNF85	-1.3927
ZBED4	-1.3905
ERAP1	-1.3902
LINC02878	-1.3879
ADD2	-1.3877
SLC2A11	-1.3862
100127994	-1.3855
PTPRK	-1.3841
HBBP1	-1.3834
ZNF878	-1.3832
EPB41L3	-1.3807
CDK18	-1.3796
ATR	-1.3786
ICAM2	-1.3762
FUNDC2P2	-1.3751
ELP1	-1.3739
EIF2AK2	-1.3726
MIGA1	-1.3713
TRIM47	-1.3695
EIF3B	-1.3687
ECRG4	-1.3665
DOCK7	-1.365
C1QTNF3	-1.365
GOLM1	-1.3648
SYNJ2BP	-1.3641
KIF19	-1.3638
SLFN12L	-1.3628
MPIG6B	-1.361
OR5P2	-1.3599
TTYH2	-1.3585
MTSS2	-1.3572
TAS2R39	-1.3556
RPIA	-1.3552
P3H4	-1.3552
ZRANB2	-1.3551
ANKRD36B	-1.3546
FUNDC2	-1.3542
SOCS6	-1.3537
84843	-1.3534
THUMPD1	-1.3531
MESD	-1.352
CNP	-1.3502
CCDC92	-1.35
GP1BB	-1.3474
SOGA3	-1.346
WWP1	-1.3459
RFPL1	-1.345
TTC21B	-1.3444
PSME2	-1.3444
EI24	-1.3431
NUB1	-1.3412
CYSLTR2	-1.3411
TLR3	-1.3393
ZNF195	-1.338
LIMD1	-1.3318
PLEKHG4	-1.3316
RUBCN	-1.3314
CDNF	-1.331
LINC01624	-1.3307
TBATA	-1.3261
IFT57	-1.3254
ELN	-1.3246
CCDC85C	-1.3243
CYSLTR1	-1.3232
NOP58	-1.3203
AK1	-1.3188
PLEKHO1	-1.3171
LPIN2	-1.3166
PGAP1	-1.3157
HSF2	-1.3115
NAP1L3	-1.3113
ZNF331	-1.3095
HMX3	-1.3084
SUPT7L	-1.3063
BTN2A2	-1.3059
ZSCAN9	-1.3055
SNTG2	-1.3046
REREP3	-1.3031
GPATCH4	-1.3022
KRTAP23-1	-1.3021
TYSND1	-1.301
RTL5	-1.3009
SPRYD7	-1.3001
NDUFA9	-1.2975
INPP5E	-1.2964
HNRNPR	-1.2961
SUGP2	-1.2955
CISD2	-1.2954
CAMKV	-1.2946
MYL9	-1.2941
NANP	-1.2936
MEIS1	-1.2909
SNORD19	-1.2863
RIF1	-1.2855
ZNF138	-1.2854
FUBP1	-1.2844
ZNF415	-1.2844
ZNF729	-1.2816
ATP2B1	-1.2807
LY9	-1.28
TPM2	-1.2795
SFTA2	-1.2772
CXCR3	-1.276
ACOT1	-1.2728
CUL2	-1.2723
UTP14C	-1.2687
C12orf4	-1.2683
WBP11	-1.2681
LTA	-1.2675
TPTE2P5	-1.264
CCDC102B	-1.2637
HLA-DOA	-1.2627
ZNF749	-1.2622
POU4F2	-1.262
SAMD12	-1.2595
CLUAP1	-1.2591
728147	-1.2588
MAN1C1	-1.2548
BPHL	-1.2541
ZNF596	-1.2539
ALG10B	-1.2534
NREP	-1.252
PRTFDC1	-1.25
NECTIN3	-1.2496
FLJ46906	-1.2479
158402	-1.2451
TSPOAP1-AS1	-1.2441
ZNF567	-1.2437
RAB44	-1.2437
PUS7L	-1.2427
FAM81B	-1.2404
S1PR2	-1.2389
FOXD2	-1.2375
REC8	-1.2373
ACY3	-1.2368
UBE2N	-1.2357
100507445	-1.2347
LOC100499489	-1.2345
ACVR1C	-1.2338
LMNTD2-AS1	-1.2335
SFMBT2	-1.2335
ZSCAN5A	-1.2331
KCNN4	-1.2289
BEX2	-1.2268
QRSL1	-1.2243
IPO8	-1.224
ZNF473	-1.2232
P2RY6	-1.2217
TMEM8B	-1.2178
HTR7	-1.2176
LRRC3B	-1.2176
NOP9	-1.2175
ZFP69	-1.2107
ZNF304	-1.2096
TJP3	-1.2093
LIN28A	-1.2087
ADAMTS5	-1.2047
ALKAL2	-1.2012
CPLANE1	-1.2012
CENPJ	-1.2011
RASAL1	-1.2002
SNORD38B	-1.1991
CRIP2	-1.1987
ARHGEF15	-1.1962
KITLG	-1.1927
SERP2	-1.1924
SLC18B1	-1.1905
TRIM44	-1.1887
ZNF546	-1.1868
GALNT11	-1.1859
LYZL1	-1.1851
EPN2	-1.1784
CMAS	-1.175
NIPAL3	-1.1747
MYOG	-1.1669
CDC42EP1	-1.1652
SEC14L2	-1.1647
SNX4	-1.1645
IRS1	-1.1592
ZNF600	-1.1588
NEDD4L	-1.1532
C1orf198	-1.1516
ZNF253	-1.1472
ENPP3	-1.1441
DDX54	-1.1388
TP53I13	-1.1324
DRD4	-1.1309
TEX261	-1.122
ZNF225	-1.1184
BBS7	-1.1184
SH3PXD2A	-1.1183
PVALB	-1.1123
RNASEH2C	-1.1101
ALDH6A1	-1.1034
MPL	-1.1033
KARS1	-1.1013
TSPAN18	-1.0969
TIGD1	-1.0965
LINC00424	-1.0911
ELL3	-1.0871
DCAF16	-1.0853
CAPRIN2	-1.0823
EIF3J	-1.0756
NR5A1	-1.0719
STX17	-1.0627
TTC38	-1.0608
DIP2A-IT1	-1.026
SNORA72	-1.0141
FLJ45513	-1.0102
ZNF320	-1.0054
ZNF136	-1.0052
SLCO1B3	1.0084
CAPZB	1.0156
CHIT1	1.0158
AOAH	1.0167
ANKHD1-EIF4EBP3	1.0257
KIF6	1.0313
GOLGA7	1.0325
CHRM3	1.0343
IDI2-AS1	1.0356
MED11	1.0391
MDM2	1.0535
UPK2	1.058
SLC46A3	1.0585
SMAP2	1.0609
TMEM165	1.0642
SAGE1	1.0687
C6orf89	1.0689
IFT20	1.0703
LINC02389	1.0717
TMBIM1	1.0721
TCTEX1D4	1.0738
DHRS7	1.0745
CSMD1	1.0752
VAPA	1.0768
LINC01137	1.0771
TCTEX1D1	1.0779
NXNL2	1.0829
PTPRG-AS1	1.0846
CCNB2	1.0866
CRIP3	1.0878
100506089	1.0884
HBE1	1.09
CLMP	1.0925
TSPAN14	1.0929
CCDC121	1.0954
RIMS2	1.0954
DAOA	1.0956
CLIC1	1.0981
NUDT22	1.0987
CTSC	1.1045
HPCA	1.1048
BABAM2	1.1051
VWA3B	1.1079
PGAP6	1.1104
SSMEM1	1.1135
CHCHD7	1.116
SNORA71A	1.1191
MXRA8	1.1193
ARID3C	1.1198
OSCAR	1.1199
CPNE4	1.1201
PSORS1C3	1.1203
C4A	1.1258
MUC1	1.1297
FTL	1.1304
ALDH1B1	1.1337
GUCY2EP	1.135
SUMF1	1.136
MYL10	1.1375
TRAPPC3	1.1389
CYB5D2	1.1406
ZFHX2	1.1407
STX7	1.1413
LINC00960	1.1426
BCKDK	1.1438
ANKRD55	1.1459
TMEM167A	1.1474
ARID5A	1.1506
C20orf203	1.1509
ACOT13	1.1536
CELA3B	1.1537
PLPPR3	1.1538
PIGV	1.1539
LPCAT3	1.1542
RGS3	1.1544
C4orf3	1.1557
VAV3-AS1	1.1568
UXT-AS1	1.1574
CPA1	1.1612
BPIFB1	1.1621
KCTD21	1.1633
OR4D2	1.1637
UBTD2	1.1653
SPANXN2	1.1657
LHX2	1.1683
TSC22D3	1.1688
VPS25	1.169
GNA15	1.1731
CHAD	1.1735
LMOD3	1.1737
100130817	1.1743
SNORD116-10	1.1767
SERPINB10	1.1772
BCL2L14	1.1777
CDC123	1.1779
SERINC2	1.1796
MYBPHL	1.1796
FRMPD1	1.1802
TMED9	1.181
LOC541473	1.1812
DUSP1	1.1816
BCKDHA	1.1823
DLC1	1.183
PGK1	1.184
LOC100506023	1.1846
ZNF775	1.1846
ADAMTS15	1.1864
CGAS	1.1878
MYL12B	1.1879
SPO11	1.1893
SLC4A9	1.1912
LRTOMT	1.1922
GPR108	1.1925
CPXM2	1.1934
ARHGEF34P	1.1943
H2AB3	1.1967
NKX6-2	1.1969
PRMT8	1.1983
DRC3	1.2012
SLC22A18AS	1.2018
LINC00658	1.2032
OR51B2	1.2039
CCDC24	1.2042
H2BC11	1.2053
SWI5	1.2055
FOXN3-AS2	1.2071
PGS1	1.2072
REEP2	1.2073
SQOR	1.2076
YIPF1	1.2079
ARL13A	1.2084
CLRN1-AS1	1.2095
SIRPB2	1.2098
PARTICL	1.2104
SPRR4	1.2107
MYO10	1.2111
FAR2P2	1.2123
RNF135	1.2139
MTX1	1.2148
SIRPD	1.2152
100129498	1.2152
BID	1.2154
DCTN2	1.2161
ROBO4	1.2161
UCN3	1.2167
PTTG1IP	1.2184
FLJ42969	1.2197
DNAJB5	1.2201
DEDD2	1.2202
ZNF780A	1.2257
CCL18	1.2262
DEFB103A	1.2265
GPSM3	1.227
TPSAB1	1.228
CEACAM20	1.2281
TPPP2	1.2297
AACSP1	1.2314
CCDC190	1.2322
CDC25C	1.2328
TRIM40	1.2343
TWF2	1.2343
KRTCAP2	1.236
MTIF3	1.2367
H4C1	1.2373
B3GNTL1	1.2381
RCOR2	1.2399
NANS	1.24
HHLA1	1.2405
YWHAH	1.2412
TKT	1.2434
HOXA11-AS	1.2442
PRCP	1.2448
FBXW2	1.2449
MAPK1	1.2458
FAM205A	1.2463
TARM1	1.247
FES	1.2477
KCNE5	1.248
USB1	1.2493
GNMT	1.2494
ALDOA	1.2495
IMPA2	1.2503
RHOD	1.2521
TRAPPC1	1.2542
CASC1	1.2565
KCNIP3	1.2585
LACRT	1.2598
B3GALT4	1.2619
GUCY2C	1.2658
ZNF474	1.267
TMLHE	1.267
SLC35E3	1.2671
GPR4	1.2694
RILPL2	1.2702
ZNF438	1.2709
LINC02875	1.2711
TEX29	1.2713
SETD9	1.2731
NFKBIA	1.2739
TAS1R1	1.2745
CCDC17	1.2747
FOXD2-AS1	1.2755
ZNF425	1.2759
CSGALNACT2	1.2774
DRAM1	1.2786
SERF2-C15ORF63	1.2789
ATP6AP1	1.281
SGTA	1.281
PNPLA3	1.2814
NETO2	1.2817
MYCBP2-AS1	1.2828
FGGY	1.2844
LINC02209	1.2852
TNIP1	1.2853
MIR670HG	1.2853
FLJ20021	1.2854
CD58	1.2872
SERPINC1	1.2886
DSC3	1.2893
CHMP2A	1.2895
PROSER2-AS1	1.29
100131227	1.2913
FAM228B	1.2914
HTR1F	1.293
OR4F6	1.2934
MRGBP	1.2935
DNTTIP1	1.2963
TTTY6	1.2964
POLD3	1.2967
ITGA8	1.2967
TNFAIP8L2	1.2973
RRAGD	1.2994
LOC401589	1.2997
C1orf100	1.3006
CD48	1.3014
SDHC	1.3026
P2RX6P	1.3044
RHBDD2	1.305
JOSD2	1.3054
FCGR2A	1.3062
CALR3	1.3076
IRF2BPL	1.3087
TEX22	1.3094
LOC729732	1.3094
FAM177A1	1.3102
PEX11G	1.3102
KDM4E	1.3103
MAP1S	1.3111
CFP	1.3125
CSF2RA	1.3135
CYRIA	1.314
LTB4R	1.314
SERPINB8	1.3155
ZFAS1	1.3157
OR2G2	1.3168
KRT19P2	1.3173
TNP1	1.3184
COX7A1	1.3193
PIM3	1.3198
SEC61B	1.3201
IER5	1.3211
ZFP36	1.3217
440137	1.3228
TLR2	1.3232
TMED8	1.3239
TPI1P2	1.3251
MYL6B	1.3251
SLC16A5	1.3258
OR13C5	1.3258
HSPA2	1.3265
CHEK1	1.3266
TIPARP	1.3279
FPR2	1.3293
RHOA	1.3297
POC1A	1.3311
H2BC8	1.3316
NDNF	1.3329
SAMD15	1.336
HAUS4	1.3363
SMIM9	1.337
100506191	1.3406
ERCC6L	1.3414
SERPINB11	1.3426
CEACAM21	1.3442
MAP1LC3B	1.3443
ABCA13	1.3446
ANO10	1.3448
MBL2	1.3474
THBD	1.3481
DPH3	1.3494
PRAMEF10	1.3508
MEF2B	1.3517
100131023	1.3543
FKBPL	1.3544
GPRIN1	1.3547
PHC2	1.3555
BST1	1.356
PAX1	1.3564
IL1B	1.3564
GNG10	1.3571
LRRC25	1.3573
SH3GL2	1.3581
100289424	1.3582
TCFL5	1.3584
C1QC	1.3613
BIRC5	1.3629
RHOG	1.3638
MID1IP1	1.3645
ARPC1B	1.366
AGO2	1.3678
BORCS5	1.3684
NEBL	1.3696
OR14I1	1.37
VOPP1	1.3703
TPI1	1.3711
SPESP1	1.3718
AICDA	1.375
IFNW1	1.3754
OR4D1	1.3777
S1PR4	1.378
FAR2	1.3788
SPRR2F	1.3816
HSD3B7	1.3825
FAM160A2	1.3856
ZNF524	1.3868
UBXN10	1.388
APOA2	1.3884
KAT8	1.3885
HEBP2	1.3904
SPIDR	1.3936
FAM71C	1.3964
NOXRED1	1.3984
LAMTOR5	1.3998
ODAM	1.4005
TNFAIP3	1.4005
DNASE2	1.4009
CCL11	1.4025
RNF144B	1.4026
RAB33A	1.4042
PIWIL4	1.4045
DOK3	1.4049
NLRP3	1.4055
CEACAM5	1.4067
GPR160	1.4084
WIPI1	1.4089
TRIM27	1.4101
PNPLA1	1.4112
CAMSAP3	1.4115
CDKN3	1.4116
100289045	1.4135
CRX	1.4136
TULP1	1.4146
CACNG5	1.4151
SAR1B	1.4162
AGPAT2	1.4166
H2AC20	1.4166
SMIM14	1.4184
SAMSN1	1.4184
GNB2	1.4198
VSIR	1.4211
SERPINA12	1.4216
SOD2	1.4216
MSRB1	1.4224
HASPIN	1.4239
CHMP4B	1.4241
C3orf36	1.4245
LSM6	1.4251
TMEM91	1.4253
TMCO3	1.4271
DHRS9	1.4271
LYZL6	1.4275
KRTAP6-3	1.4288
DSCAM	1.429
TP53I3	1.4311
HMGB2	1.4316
TNFSF14	1.4321
NUDT5	1.4332
646482	1.4345
PCDHB9	1.4347
FRZB	1.4351
CBS	1.437
LOC151760	1.4382
LOC100128276	1.4399
SLC25A12	1.4401
SYN2	1.441
MLXIP	1.4416
C5orf52	1.4434
PYGL	1.4436
MTHFD1L	1.4442
TRAPPC5	1.4447
RGS14	1.4459
TSPY26P	1.4462
IL18RAP	1.4466
SRD5A3-AS1	1.4469
HABP2	1.4476
SLC11A1	1.4476
PLPP3	1.45
ATP6V0E1	1.4505
HSPA1B	1.451
DEFT1P	1.4558
AK7	1.4577
GRAMD1A	1.4608
S100A11	1.4615
WDYHV1	1.4617
GALNT2	1.4628
LINC01095	1.4634
SLC15A4	1.4649
SPAG6	1.4672
100131657	1.4674
H2AC15	1.4675
H2BC3	1.4695
CEP55	1.4697
INSL3	1.4734
KIF15	1.4736
GGTLC1	1.4743
OTUD1	1.4752
OIP5	1.4771
H2BC7	1.4773
RSPH14	1.4782
VWA5A	1.4794
100130078	1.4798
C1QTNF8	1.4802
UBTD1	1.4804
C11orf71	1.4812
LOC153910	1.4817
MAP1LC3BP1	1.4817
TMEM107	1.4829
MAK	1.4836
CNIH4	1.4839
FUT7	1.4865
OLFML3	1.487
SIGLEC9	1.487
CYBA	1.4882
AJM1	1.4929
TJP1	1.4934
OR4K14	1.4934
CLIC5	1.4947
C19orf38	1.4953
CCDC110	1.4969
LEMD1-AS1	1.4971
PRDX5	1.4993
TOLLIP	1.4999
NUDT16P1	1.5009
ACVR1B	1.5011
MYO7B	1.5027
MFF	1.5047
DAZL	1.5047
MAD2L2	1.5054
MKNK1	1.5055
EDARADD	1.5062
SRY	1.511
VENTXP7	1.512
PRSS27	1.5189
RPPH1	1.5203
B9D2	1.5229
DOCK6	1.524
SAA2	1.5257
CLDN18	1.5282
NOP10	1.5286
KIAA1656	1.529
LINC01132	1.5312
TPST2	1.5316
UGT2A1	1.5321
UGCG	1.533
BASP1P1	1.5332
ADGRE1	1.5339
PGD	1.5366
GGH	1.5401
CEACAM6	1.5404
MS4A3	1.5405
HTR3D	1.5406
CLDN20	1.5415
FAM27C	1.5417
SAP30	1.5439
ZNF391	1.5445
EFHB	1.5456
H2AC4	1.5457
SHCBP1L	1.546
GLDN	1.5468
QSOX1	1.5512
CXCL16	1.5534
CLEC12B	1.5548
RNF146	1.5562
PPP1R3D	1.5577
HYAL2	1.5581
MND1	1.5588
ANKRD34C-AS1	1.5592
ITIH4	1.5592
DCAF4L1	1.5605
SYNE3	1.5608
MS4A6A	1.5618
LIFR	1.5621
TBC1D8	1.5622
PPP1R27	1.5623
CEBPD	1.5633
C7orf25	1.5653
ABHD5	1.5655
CEBPA	1.5663
SERPINA1	1.5665
FOXR2	1.5666
ALAS1	1.5698
RAB17	1.5721
NDST2	1.5736
H2BC5	1.5763
SCARNA22	1.5769
SYNPO	1.5776
VILL	1.5777
CAMKK2	1.5808
XBP1	1.5811
RAI2	1.5847
OSM	1.5852
CD55	1.5878
NQO2	1.588
TRIM53AP	1.5884
H2AC21	1.5888
RGS7BP	1.5896
NLRP6	1.5913
TMEM178B	1.5924
TSPO	1.5924
FOXC1	1.5931
RHOB	1.5936
WDFY3-AS2	1.5937
BBC3	1.5941
BTNL8	1.5966
ATL3	1.5973
SPINK8	1.5984
PLP2	1.6004
NMNAT2	1.6043
RPL23AP32	1.6051
NECAB2	1.608
93444	1.6098
LINC00937	1.6106
MRAP2	1.6131
KLF7	1.6133
FOS	1.6134
SLC5A9	1.6136
HK3	1.6151
DSPP	1.6168
RASSF8	1.6181
NEBL-AS1	1.6184
UBTFL1	1.6194
MTHFS	1.6223
GALK1	1.6225
CD24	1.6232
SPDYA	1.6235
SH3PXD2B	1.6235
SH2D4A	1.6272
KCNAB1-AS2	1.6275
S100P	1.628
OR2D2	1.6287
BTBD8	1.6292
POR	1.6311
CABP1	1.6312
PLIN3	1.6318
POM121L4P	1.6321
S100A12	1.6328
LINC00910	1.6342
CKAP2L	1.6357
SLC22A18	1.6364
153546	1.6401
LINC01220	1.6406
SNX3	1.6417
100130232	1.6421
647115	1.6422
LOC100289495	1.6423
GAPDH	1.6437
SPC25	1.6438
PPM1N	1.6466
H2AC7	1.6466
COL9A2	1.6479
CYP1B1-AS1	1.6479
H2BC13	1.6487
IL1R1	1.65
SMG7-AS1	1.656
LINC01142	1.6566
TP53TG3D	1.6616
DRD5	1.6661
MCAM	1.6689
H2BC9	1.6748
PDLIM7	1.6773
TNFAIP6	1.6782
CERS4	1.6793
H2BC17	1.6806
NSG2	1.6827
LRRC4B	1.6844
SULT1B1	1.6845
IP6K3	1.6854
PRTN3	1.69
RABAC1	1.6921
NFE2	1.6941
HMOX1	1.6964
FAM71F1	1.7001
USP10	1.7039
KCNJ9	1.7042
CD99L2	1.7045
MUSTN1	1.7051
RAB32	1.7064
WFDC2	1.7066
CDA	1.7075
MEDAG	1.7103
RTN2	1.7109
TCEAL7	1.7112
GPR141	1.7116
LOC100505664	1.7127
C9orf152	1.7133
CYP39A1	1.7135
LHX4-AS1	1.714
CDT1	1.7142
CLRN2	1.7155
C2orf73	1.7155
AP3S2	1.7168
SLC25A40	1.7192
LIN7A	1.7204
PDS5A	1.721
JUNB	1.7214
LRRC37A5P	1.7216
LOC100996664	1.7229
CMTM2	1.726
PECR	1.7271
FAM90A7P	1.7273
CAPN13	1.7278
FOXR1	1.7282
ABCC2	1.7317
OR4F29	1.732
COL9A3	1.7333
H2AC11	1.7333
RSPH9	1.7334
GRM5-AS1	1.7344
ST6GALNAC2	1.7369
FLOT1	1.7398
ALCAM	1.7423
KCNH3	1.746
DPPA2P3	1.7472
SGSH	1.7485
PFKFB2	1.7512
COL18A1	1.7513
GLIS2	1.7525
H2AC19	1.7529
BASP1	1.7531
C4orf36	1.7541
KCNJ4	1.7554
ST8SIA5	1.7555
TMEM205	1.756
LOC100505774	1.7634
FAM114A1	1.7664
SLIT2	1.7667
DICER1-AS1	1.7673
CCDC148	1.7687
ALOX12P2	1.7689
283516	1.7695
GPR143	1.7703
AMPH	1.7762
PRRT4	1.7772
C1orf122	1.7782
GNG5	1.7785
MPZ	1.7827
SERPINB1	1.7833
MAPK14	1.7834
ACBD6	1.785
EFEMP2	1.786
BTBD19	1.7903
HILPDA	1.7908
TLR5	1.7934
FGF13-AS1	1.7973
MXRA7	1.7979
ELOA3	1.7988
EXOSC4	1.801
NTSR1	1.8067
B3GNT8	1.8097
CDKN2B	1.814
CLIC4	1.8176
OTULINL	1.8206
100131043	1.8248
728099	1.8302
GGT5	1.8323
ITPKC	1.8363
LOC154761	1.8371
MBNL1-AS1	1.8387
TRPM2	1.8392
TPK1	1.8394
H2AC17	1.8415
TMEM120A	1.8457
RFX2	1.85
TUBB3	1.8504
NFE4	1.8544
ROPN1L	1.8553
100506219	1.8562
C4BPB	1.8587
RNF225	1.8635
TMEM119	1.8635
DHRS13	1.8708
LINC01270	1.8711
CLEC4E	1.8768
STIMATE	1.8781
645840	1.8788
APH1B	1.879
ZNF396	1.8821
CSGALNACT1	1.8853
SIRT5	1.8854
DGKH	1.8858
CD63	1.8859
100505827	1.8869
KCNJ16	1.888
ZNF354A	1.8885
SCGB1D1	1.8921
SOST	1.8937
PLB1	1.894
C1QTNF9B	1.8943
TMEM169	1.901
PLIN4	1.9083
LDHA	1.9105
CEACAM8	1.9201
FABP2	1.9306
C3AR1	1.9328
NNMT	1.9354
PPP1R15A	1.9454
PLAC8	1.9491
SLC31A2	1.9517
AP3B2	1.9557
ENO1	1.9584
IGFBP7	1.9596
100505564	1.9607
H1-5	1.9633
FCER1G	1.9634
100127910	1.9641
OR51Q1	1.9644
ITGA7	1.9651
HMGB3P1	1.9652
AGFG1	1.9693
ROM1	1.9722
PLK2	1.9758
ARRDC4	1.9789
ST3GAL4	1.9795
RCVRN	1.9847
LOC100505985	1.9906
VTRNA1-2	1.9907
GHRL	2.001
SOCS3	2.0056
MIR210HG	2.0078
SMAD1	2.0113
LRRN1	2.0145
MADCAM1	2.0161
AKR1C1	2.0165
BLOC1S1	2.0181
EXT1	2.0242
ITGB4	2.0252
ENTPD7	2.0262
FOLR3	2.0268
SLC22A7	2.0277
H3C15	2.0292
GABRR2	2.0294
SIGLEC5	2.0318
CST7	2.0318
BEX1	2.0354
CCDC140	2.0408
SLC16A3	2.0432
IDNK	2.0527
RGL4	2.0533
C1QTNF9	2.055
KLF9	2.0554
LOC254896	2.0581
NSMCE1-DT	2.0694
C1orf162	2.0753
SPRY1	2.0873
IL1RL1	2.0991
GUCY2F	2.1027
MGC12916	2.1129
ARHGEF40	2.1191
SGMS2	2.1229
ZP2	2.1251
ALPL	2.13
CATSPER1	2.1363
ICAM5	2.1483
PDGFC	2.1508
LRRC14B	2.1537
INHBB	2.1538
ADM	2.1541
CLEC12A	2.1617
PAX6	2.1631
AOAH-IT1	2.1659
AGTRAP	2.1726
DEFA3	2.1782
CYP1B1	2.1838
C2CD4B	2.1868
LORICRIN	2.192
HPR	2.194
SYCE3	2.1975
FLT3	2.2007
CDK5RAP2	2.2059
RAB20	2.209
ANXA3	2.2324
CD163L1	2.2398
554223	2.2416
DDAH2	2.2429
TACSTD2	2.2429
MERTK	2.2439
FAM110B	2.2479
LTF	2.2564
GRINA	2.2593
ZNF687-AS1	2.2619
ADGRG2	2.2644
SLC1A3	2.2658
BMX	2.2692
ISL2	2.2708
ABCC11	2.2727
SMCO4	2.2758
OPLAH	2.2843
FKBP5	2.2925
LDLR	2.294
RASGEF1A	2.2944
PRG1	2.2945
FFAR3	2.3168
AZU1	2.3185
MMP9	2.3198
729187	2.3201
LILRA5	2.3337
TAAR1	2.3348
BATF	2.3386
PHF24	2.3515
PPARG	2.3518
CLEC4D	2.3523
ASPH	2.36
RETN	2.3652
SHROOM2	2.3713
BMP2	2.3769
CLDN11	2.3774
GYG1	2.3778
IL18R1	2.3796
TULP2	2.385
JUN	2.3935
CDKN2C	2.404
PLIN5	2.404
PGLYRP1	2.4114
CA4	2.4121
LAIR1	2.4165
CTSG	2.4203
MACIR	2.4284
FAM20A	2.4288
PDE6H	2.4399
MPO	2.4493
LCN2	2.4499
ST6GALNAC3	2.452
GRIN3B	2.4622
IL1A	2.4662
MUCL1	2.4728
ECHDC3	2.4777
H2AC16	2.4843
SGPP2	2.4843
KL	2.5111
FSTL5	2.5376
ETS2	2.5568
NRN1	2.5572
GADD45A	2.5605
CD82	2.5619
LINC01093	2.5632
IRAK3	2.5721
MYO1B	2.5808
LRRC70	2.5933
MMP8	2.5961
[truncated: 69 more rows]
