# Supplementary material for: Inflammatory signature in acute-on-chronic liver failure includes increased expression of granulocyte genes ELANE, MPO and CD177
Source: Sci Rep. 2021 Sep 22;11:18849. doi: 10.1038/s41598-021-98086-6 (PMC8458283; doi:10.1038/s41598-021-98086-6)
Supplement: Supplementary file 10 — Supplementary Information 10. [file 41598_2021_98086_MOESM10_ESM.xlsx]

## Sheet: DEG
EntrezID	logFC	AveExpr	t	P.Value	adj.P.Val	B	Symbols	Name
57126	7.4834	11.776	9.7981	2.2853e-09	3.965e-05	11.178	CD177	CD177 molecule
2887	4.7979	12.266	8.5887	2.2164e-08	0.00013312	9.179	GRB10	growth factor receptor bound protein 10
8436	-5.6224	6.4591	-8.5693	2.3018e-08	0.00013312	9.1453	CAVIN2	caveolae associated protein 2
4753	-4.7433	6.6701	-8.1868	4.9156e-08	0.00021321	8.4652	NELL2	neural EGFL like 2
348093	-4.4868	3.9634	-7.8054	1.0676e-07	0.00029318	7.7644	RBPMS2	"RNA binding protein, mRNA processing factor 2"
221476	-3.6368	6.0891	-7.7733	1.1408e-07	0.00029318	7.7043	PI16	peptidase inhibitor 16
100128420	-4.5941	5.3308	-7.7197	1.2744e-07	0.00029318	7.6038	LINC00892	long intergenic non-protein coding RNA 892
199675	4.3386	15.011	7.6836	1.3734e-07	0.00029318	7.5358	MCEMP1	mast cell expressed membrane protein 1
4603	-4.575	7.335	-7.6346	1.5208e-07	0.00029318	7.4431	MYBL1	MYB proto-oncogene like 1
383	6.321	13.415	7.5178	1.9414e-07	0.00033683	7.2207	ARG1	arginase 1
55301	7.745	9.503	7.3793	2.5991e-07	0.00036159	6.9543	OLAH	oleoyl-ACP hydrolase
2781	-4.2408	7.5005	-7.3619	2.697e-07	0.00036159	6.9205	GNAZ	G protein subunit alpha z
8460	4.2301	12.39	7.3597	2.7093e-07	0.00036159	6.9163	TPST1	tyrosylprotein sulfotransferase 1
79993	-4.0388	4.6097	-7.1516	4.2235e-07	0.00052342	6.5097	ELOVL7	ELOVL fatty acid elongase 7
3486	-3.7834	3.8299	-7.0481	5.2784e-07	0.00061054	6.3049	IGFBP3	insulin like growth factor binding protein 3
653316	-4.731	5.4577	-6.9908	5.9749e-07	0.00064791	6.1909	FAM153CP	"family with sequence similarity 153 member C, pseudogene"
5208	3.3516	11.688	6.9348	6.7483e-07	0.00065829	6.0789	PFKFB2	"6-phosphofructo-2-kinase/fructose-2,6-biphosphatase 2"
6097	-4.3059	5.5234	-6.9063	7.1798e-07	0.00065829	6.0218	RORC	RAR related orphan receptor C
3800	-4.5776	4.655	-6.8983	7.3071e-07	0.00065829	6.0056	KIF5C	kinesin family member 5C
2205	-6.0881	6.6817	-6.8809	7.5884e-07	0.00065829	5.9708	FCER1A	Fc fragment of IgE receptor Ia
6932	-4.21	7.4267	-6.8523	8.079e-07	0.00066748	5.913	TCF7	transcription factor 7
56911	-4.4783	5.0285	-6.8106	8.8508e-07	0.00068275	5.8289	MAP3K7CL	MAP3K7 C-terminal like
4306	-3.8211	4.1558	-6.8004	9.0508e-07	0.00068275	5.8083	NR3C2	nuclear receptor subfamily 3 group C member 2
81027	-5.1816	6.8933	-6.759	9.9131e-07	0.00069936	5.7243	TUBB1	tubulin beta 1 class VI
100131176	-4.8982	4.6439	-6.7515	1.0077e-06	0.00069936	5.7091	WDR86-AS1	WDR86 antisense RNA 1
122402	4.5983	10.814	6.712	1.0994e-06	0.00073361	5.6287	TDRD9	tudor domain containing 9
10219	-4.3494	6.9468	-6.6667	1.215e-06	0.00076126	5.5363	KLRG1	killer cell lectin like receptor G1
202134	-4.3269	3.8352	-6.6617	1.2285e-06	0.00076126	5.526	FAM153B	family with sequence similarity 153 member B
2992	3.3846	13.678	6.6292	1.32e-06	0.0007645	5.4596	GYG1	glycogenin 1
23531	-3.6935	8.0502	-6.6286	1.3219e-06	0.0007645	5.4583	MMD	monocyte to macrophage differentiation associated
7754	-4.2505	3.8207	-6.5789	1.4757e-06	0.00081183	5.3564	ZNF204P	"zinc finger protein 204, pseudogene"
5577	-4.7157	6.9514	-6.5724	1.4973e-06	0.00081183	5.343	PRKAR2B	protein kinase cAMP-dependent type II regulatory subunit beta
3580	-4.5435	6.1992	-6.5406	1.607e-06	0.00082735	5.2775	CXCR2P1	C-X-C motif chemokine receptor 2 pseudogene 1
11123	-3.2266	6.9087	-6.5366	1.6213e-06	0.00082735	5.2693	RCAN3	RCAN family member 3
11213	3.6201	12.876	6.4904	1.7976e-06	0.0008911	5.1736	IRAK3	interleukin 1 receptor associated kinase 3
84281	-4.133	5.3781	-6.3991	2.2049e-06	0.0010449	4.9842	C2orf88	chromosome 2 open reading frame 88
9737	-3.7164	6.0941	-6.3818	2.2925e-06	0.0010449	4.9481	GPRASP1	G protein-coupled receptor associated sorting protein 1
28231	4.5811	5.5391	6.3811	2.296e-06	0.0010449	4.9467	SLCO4A1	solute carrier organic anion transporter family member 4A1
85478	-3.9126	3.6685	-6.3644	2.384e-06	0.0010449	4.9118	CCDC65	coiled-coil domain containing 65
2017	-3.4002	6.1316	-6.3598	2.4089e-06	0.0010449	4.9021	CTTN	cortactin
56172	-3.6267	3.8456	-6.3299	2.5763e-06	0.0010902	4.8397	ANKH	ANKH inorganic pyrophosphate transport regulator
9882	-4.0599	4.9466	-6.3153	2.6626e-06	0.0010999	4.8091	TBC1D4	TBC1 domain family member 4
2791	-4.6187	8.3009	-6.2822	2.869e-06	0.0011576	4.7397	GNG11	G protein subunit gamma 11
79746	3.2582	9.7548	6.262	3.0031e-06	0.0011842	4.6973	ECHDC3	enoyl-CoA hydratase domain containing 3
2289	3.6218	11.627	6.2052	3.4152e-06	0.0013168	4.5777	FKBP5	FKBP prolyl isomerase 5
8718	-4.591	8.5824	-6.158	3.8018e-06	0.0014339	4.4779	TNFRSF25	TNF receptor superfamily member 25
959	-3.9006	7.1205	-6.1404	3.9573e-06	0.0014608	4.4406	CD40LG	CD40 ligand
153643	-2.9358	3.7415	-6.1293	4.0581e-06	0.0014668	4.4172	FAM81B	family with sequence similarity 81 member B
8876	3.9743	13.644	6.1078	4.262e-06	0.0014693	4.3715	VNN1	vanin 1
11043	-3.491	3.744	-6.1068	4.2717e-06	0.0014693	4.3694	MID2	midline 2
3820	-4.6874	9.1095	-6.102	4.3189e-06	0.0014693	4.3592	KLRB1	killer cell lectin like receptor B1
3575	-4.8055	10.339	-6.0306	5.0835e-06	0.0016961	4.2073	IL7R	interleukin 7 receptor
58484	3.0399	13.206	6.0213	5.193e-06	0.0017	4.1874	NLRC4	NLR family CARD domain containing 4
157638	-3.6751	4.883	-5.9726	5.8064e-06	0.0018656	4.0833	LRATD2	LRAT domain containing 2
3003	-5.2939	7.973	-5.9413	6.2391e-06	0.0019681	4.0163	GZMK	granzyme K
80763	-3.44	3.5357	-5.9089	6.7231e-06	0.0020545	3.9466	SPX	spexin hormone
146330	-4.3838	7.2072	-5.9072	6.7495e-06	0.0020545	3.9429	FBXL16	F-box and leucine rich repeat protein 16
64919	-3.7864	7.483	-5.8899	7.0239e-06	0.0020739	3.9057	BCL11B	BAF chromatin remodeling complex subunit BCL11B
23500	4.353	9.8203	5.8881	7.0526e-06	0.0020739	3.9019	DAAM2	dishevelled associated activator of morphogenesis 2
256435	3.1583	9.3846	5.8678	7.3911e-06	0.0021373	3.8582	ST6GALNAC3	"ST6 N-acetylgalactosaminide alpha-2,6-sialyltransferase 3"
79414	-2.9848	6.3936	-5.8531	7.6458e-06	0.0021543	3.8265	LRFN3	leucine rich repeat and fibronectin type III domain containing 3
6886	-3.2594	4.614	-5.8501	7.6984e-06	0.0021543	3.8201	TAL1	"TAL bHLH transcription factor 1, erythroid differentiation factor"
59338	-4.6722	6.4993	-5.7973	8.6973e-06	0.0023952	3.7062	PLEKHA1	pleckstrin homology domain containing A1
441307	-3.7642	4.001	-5.7893	8.8616e-06	0.0024023	3.6887	HRAT92	heart tissue-associated transcript 92
90075	-2.924	4.2262	-5.7658	9.3558e-06	0.0024685	3.638	ZNF30	zinc finger protein 30
1803	-5.1775	5.5481	-5.7617	9.445e-06	0.0024685	3.6291	DPP4	dipeptidyl peptidase 4
1397	-2.9733	4.8723	-5.7578	9.5324e-06	0.0024685	3.6205	CRIP2	cysteine rich protein 2
8320	-5.3161	5.5736	-5.7232	1.0329e-05	0.002599	3.5455	EOMES	eomesodermin
814	-3.7623	5.1317	-5.7229	1.0336e-05	0.002599	3.5448	CAMK4	calcium/calmodulin dependent protein kinase IV
9397	-2.8927	4.699	-5.7061	1.0747e-05	0.0026637	3.5084	NMT2	N-myristoyltransferase 2
921	-4.8768	7.9087	-5.6799	1.1423e-05	0.0027914	3.4513	CD5	CD5 molecule
123036	-4.5999	5.4032	-5.6575	1.2036e-05	0.0029003	3.4025	TC2N	"tandem C2 domains, nuclear"
4638	-2.99	5.3936	-5.6332	1.2736e-05	0.0029937	3.3495	MYLK	myosin light chain kinase
923	-4.3811	8.9205	-5.6321	1.2769e-05	0.0029937	3.3472	CD6	CD6 molecule
11278	-3.926	7.2975	-5.5975	1.3841e-05	0.0032019	3.2717	KLF12	Kruppel like factor 12
10223	-3.5597	5.353	-5.5905	1.4072e-05	0.0032124	3.2562	GPA33	glycoprotein A33
3690	-3.61	6.9867	-5.5834	1.4305e-05	0.0032233	3.2408	ITGB3	integrin subunit beta 3
5087	-3.0342	3.3973	-5.5727	1.4667e-05	0.0032626	3.2174	PBX1	PBX homeobox 1
2207	2.792	16.605	5.5456	1.5627e-05	0.0034319	3.1581	FCER1G	Fc fragment of IgE receptor Ig
128611	-4.4592	6.5069	-5.5346	1.6037e-05	0.0034781	3.1338	ZNF831	zinc finger protein 831
83699	-3.1399	4.8928	-5.5196	1.6611e-05	0.0035325	3.1009	SH3BGRL2	SH3 domain binding glutamate rich protein like 2
4900	-3.5758	9.3223	-5.5174	1.6695e-05	0.0035325	3.0962	NRGN	neurogranin
147199	-3.1126	4.199	-5.4954	1.758e-05	0.0035758	3.0478	SCGB1C1	secretoglobin family 1C member 1
22927	-4.0295	6.1109	-5.4953	1.7584e-05	0.0035758	3.0476	HABP4	hyaluronan binding protein 4
51440	-2.3183	3.5357	-5.4933	1.7667e-05	0.0035758	3.0432	HPCAL4	hippocalcin like 4
7535	-3.8693	7.2704	-5.4858	1.798e-05	0.0035758	3.0268	ZAP70	zeta chain of T cell receptor associated protein kinase 70
222223	-2.6461	3.4383	-5.4802	1.8217e-05	0.0035758	3.0145	KIAA1324L	KIAA1324 like
4118	-4.0922	9.2643	-5.4794	1.825e-05	0.0035758	3.0128	MAL	"mal, T cell differentiation protein"
3975	4.0766	7.51	5.4737	1.8497e-05	0.0035758	3.0002	LHX1	LIM homeobox 1
8821	-2.8912	4.8014	-5.4725	1.8549e-05	0.0035758	2.9975	INPP4B	inositol polyphosphate-4-phosphatase type II B
6604	3.1296	13.83	5.4672	1.8779e-05	0.0035805	2.986	SMARCD3	"SWI/SNF related, matrix associated, actin dependent regulator of chromatin, subfamily d, member 3"
1647	3.3733	12.816	5.4546	1.9348e-05	0.0036487	2.9581	GADD45A	growth arrest and DNA damage inducible alpha
7049	-3.412	4.8629	-5.4446	1.9804e-05	0.0036546	2.9362	TGFBR3	transforming growth factor beta receptor 3
5588	-4.2271	5.2103	-5.4435	1.9857e-05	0.0036546	2.9337	PRKCQ	protein kinase C theta
26049	-3.3638	4.7844	-5.4389	2.0072e-05	0.0036546	2.9236	FAM169A	family with sequence similarity 169 member A
9063	3.4551	10.789	5.4347	2.027e-05	0.0036546	2.9144	PIAS2	protein inhibitor of activated STAT 2
200931	4.7019	9.2778	5.4314	2.0432e-05	0.0036546	2.907	SLC51A	solute carrier family 51 subunit alpha
2625	-3.6404	5.8325	-5.421	2.0935e-05	0.0036725	2.8842	GATA3	GATA binding protein 3
10929	-3.9282	6.5997	-5.4201	2.0978e-05	0.0036725	2.8822	SRSF8	serine and arginine rich splicing factor 8
58473	-3.1989	6.9486	-5.4163	2.1171e-05	0.0036725	2.8737	PLEKHB1	pleckstrin homology domain containing B1
874	-3.1635	3.8936	-5.4088	2.1545e-05	0.0036725	2.8573	CBR3	carbonyl reductase 3
5361	-3.9545	5.7142	-5.4079	2.159e-05	0.0036725	2.8553	PLXNA1	plexin A1
2624	-3.2397	4.5284	-5.378	2.3169e-05	0.0038675	2.7891	GATA2	GATA binding protein 2
57605	-3.1586	3.7217	-5.3741	2.3382e-05	0.0038675	2.7806	PITPNM2	phosphatidylinositol transfer protein membrane associated 2
8671	-3.2118	3.028	-5.3736	2.3406e-05	0.0038675	2.7796	SLC4A4	solute carrier family 4 member 4
64854	-2.8374	3.2863	-5.3684	2.3699e-05	0.0038677	2.7679	USP46	ubiquitin specific peptidase 46
154075	-4.3627	6.1488	-5.3656	2.3853e-05	0.0038677	2.7619	SAMD3	sterile alpha motif domain containing 3
9249	-3.3757	7.616	-5.3532	2.4561e-05	0.0039456	2.7345	DHRS3	dehydrogenase/reductase 3
29851	-3.1835	6.8226	-5.3444	2.5075e-05	0.0039881	2.715	ICOS	inducible T cell costimulator
64388	-3.6075	3.6185	-5.3375	2.5488e-05	0.0039881	2.6997	GREM2	"gremlin 2, DAN family BMP antagonist"
80003	-2.6584	6.505	-5.3371	2.5514e-05	0.0039881	2.6987	PCNX2	pecanex 2
387763	4.8932	9.9094	5.3323	2.5806e-05	0.0039976	2.6881	C11orf96	chromosome 11 open reading frame 96
51176	-4.6124	8.8266	-5.3209	2.6508e-05	0.0040701	2.6629	LEF1	lymphoid enhancer binding factor 1
79710	-3.2481	4.4276	-5.3099	2.7203e-05	0.0040895	2.6387	MORC4	MORC family CW-type zinc finger 4
3565	-4.0023	3.8508	-5.3069	2.7397e-05	0.0040895	2.632	IL4	interleukin 4
2026	-3.2431	5.2415	-5.3026	2.7676e-05	0.0040895	2.6225	ENO2	enolase 2
7188	-3.1055	7.135	-5.3008	2.7798e-05	0.0040895	2.6184	TRAF5	TNF receptor associated factor 5
5197	-4.4109	5.7204	-5.3005	2.7814e-05	0.0040895	2.6178	PF4V1	platelet factor 4 variant 1
338339	3.6879	12.89	5.2939	2.8255e-05	0.0041196	2.6031	CLEC4D	C-type lectin domain family 4 member D
3702	-5.0285	6.4324	-5.2768	2.9418e-05	0.0042534	2.5652	ITK	IL2 inducible T cell kinase
27030	-3.5461	5.9256	-5.2707	2.9844e-05	0.0042792	2.5518	MLH3	mutL homolog 3
26119	-4.2699	4.8611	-5.2655	3.0215e-05	0.0042831	2.5402	LDLRAP1	low density lipoprotein receptor adaptor protein 1
283089	-3.2737	3.1543	-5.2602	3.0598e-05	0.0042831	2.5284	WDR11-AS1	WDR11 antisense RNA 1
914	-4.0009	9.4113	-5.26	3.0611e-05	0.0042831	2.528	CD2	CD2 molecule
399665	-4.8637	9.4037	-5.2528	3.114e-05	0.0043222	2.5119	FAM102A	family with sequence similarity 102 member A
219670	-3.2461	4.9618	-5.2361	3.239e-05	0.0044601	2.475	ENKUR	"enkurin, TRPC channel interacting protein"
50852	-4.6994	6.3985	-5.2206	3.3605e-05	0.0045909	2.4404	TRAT1	T cell receptor associated transmembrane adaptor 1
2114	2.8772	12.429	5.2007	3.5233e-05	0.0047757	2.396	ETS2	"ETS proto-oncogene 2, transcription factor"
5797	-2.969	3.7701	-5.1955	3.567e-05	0.0047974	2.3845	PTPRM	protein tyrosine phosphatase receptor type M
10924	3.7446	11.024	5.1759	3.7364e-05	0.0049867	2.3409	SMPDL3A	sphingomyelin phosphodiesterase acid like 3A
8835	-3.4004	6.9417	-5.1636	3.8475e-05	0.0050592	2.3134	SOCS2	suppressor of cytokine signaling 2
79047	-2.9663	3.7624	-5.1634	3.8491e-05	0.0050592	2.3131	KCTD15	potassium channel tetramerization domain containing 15
919	-4.4763	8.0498	-5.1536	3.9395e-05	0.0051272	2.2913	CD247	CD247 molecule
55755	3.0517	12.065	5.1514	3.9599e-05	0.0051272	2.2864	CDK5RAP2	CDK5 regulatory subunit associated protein 2
10755	-2.8889	8.949	-5.1434	4.0361e-05	0.0051872	2.2685	GIPC1	GIPC PDZ domain containing family member 1
11138	3.0284	10.203	5.1299	4.1678e-05	0.0052798	2.2384	TBC1D8	TBC1 domain family member 8
81794	-2.933	6.9709	-5.1285	4.1822e-05	0.0052798	2.2352	ADAMTS10	ADAM metallopeptidase with thrombospondin type 1 motif 10
64061	-3.5301	5.218	-5.1255	4.2114e-05	0.0052798	2.2286	TSPYL2	TSPY like 2
347686	-3.8991	4.2992	-5.1224	4.2426e-05	0.0052798	2.2217	SNORD64	"small nucleolar RNA, C/D box 64"
27018	-3.5145	8.2756	-5.1207	4.2604e-05	0.0052798	2.2178	BEX3	brain expressed X-linked 3
55733	-3.006	4.4107	-5.1142	4.3265e-05	0.0052911	2.2033	HHAT	hedgehog acyltransferase
5335	-3.2433	5.0655	-5.1114	4.3551e-05	0.0052911	2.1971	PLCG1	phospholipase C gamma 1
4675	-2.8827	3.7427	-5.1063	4.4088e-05	0.0052911	2.1856	NAP1L3	nucleosome assembly protein 1 like 3
8631	-4.3542	8.7026	-5.1056	4.4154e-05	0.0052911	2.1842	SKAP1	src kinase associated phosphoprotein 1
8809	3.7785	10.857	5.1033	4.4396e-05	0.0052911	2.1791	IL18R1	interleukin 18 receptor 1
3212	-3.9823	5.5207	-5.1015	4.459e-05	0.0052911	2.175	HOXB2	homeobox B2
5617	4.2019	7.5279	5.099	4.4861e-05	0.0052911	2.1693	PRL	prolactin
5473	-4.2263	10.755	-5.0964	4.5135e-05	0.0052911	2.1636	PPBP	pro-platelet basic protein
7850	4.6882	14.821	5.0901	4.5821e-05	0.0053355	2.1494	IL1R2	interleukin 1 receptor type 2
144571	-3.0873	7.7273	-5.0866	4.6197e-05	0.0053434	2.1418	A2M-AS1	A2M antisense RNA 1
8434	-2.814	4.8843	-5.0806	4.6867e-05	0.0053848	2.1283	RECK	reversion inducing cysteine rich protein with kazal motifs
7074	-3.5335	7.5913	-5.0777	4.7192e-05	0.0053848	2.1218	TIAM1	TIAM Rac1 associated GEF 1
347746	-2.7311	6.6069	-5.0751	4.7486e-05	0.0053848	2.1159	PWARSN	"Prader Willi/Angelman region RNA, SNRPN neighbor"
26249	-3.6637	5.2436	-5.067	4.8403e-05	0.0054532	2.098	KLHL3	kelch like family member 3
3710	-4.0085	5.913	-5.0585	4.9393e-05	0.0055288	2.079	ITPR3	"inositol 1,4,5-trisphosphate receptor type 3"
26052	-3.4589	5.4185	-5.0282	5.3094e-05	0.005905	2.0111	DNM3	dynamin 3
55008	-2.7878	4.8683	-5.0232	5.3737e-05	0.0059385	1.9998	HERC6	HECT and RLD domain containing E3 ubiquitin protein ligase family member 6
22806	-3.6164	4.8732	-5.0156	5.472e-05	0.0059721	1.9828	IKZF3	IKAROS family zinc finger 3
80714	-2.7942	7.8438	-5.0155	5.473e-05	0.0059721	1.9826	PBX4	PBX homeobox 4
53347	-3.03	5.7395	-5.0045	5.6177e-05	0.006082	1.9581	UBASH3A	ubiquitin associated and SH3 domain containing A
9365	3.5298	6.3046	4.9958	5.7363e-05	0.006082	1.9385	KL	klotho
57189	-4.0486	6.1852	-4.9918	5.7906e-05	0.006082	1.9297	DENND11	DENN domain containing 11
10225	-4.7389	6.7188	-4.9908	5.8045e-05	0.006082	1.9274	CD96	CD96 molecule
158586	-3.7465	5.8801	-4.99	5.8165e-05	0.006082	1.9255	ZXDB	zinc finger X-linked duplicated B
117145	-2.924	5.8599	-4.9899	5.8177e-05	0.006082	1.9253	THEM4	thioesterase superfamily member 4
6375	-4.6538	5.3896	-4.9891	5.8282e-05	0.006082	1.9236	XCL1	X-C motif chemokine ligand 1
171558	-3.9155	7.6586	-4.9861	5.8702e-05	0.006082	1.9169	PTCRA	pre T cell antigen receptor alpha
84636	-2.9204	4.5067	-4.9832	5.9116e-05	0.006082	1.9103	GPR174	G protein-coupled receptor 174
1741	-4.088	5.1378	-4.9823	5.9242e-05	0.006082	1.9083	DLG3	discs large MAGUK scaffold protein 3
84247	-3.8429	5.0502	-4.9698	6.1035e-05	0.0061261	1.8802	RTL6	retrotransposon Gag like 6
10125	-3.173	8.8322	-4.9687	6.1196e-05	0.0061261	1.8778	RASGRP1	RAS guanyl releasing protein 1
283174	-3.1243	4.1963	-4.9676	6.1359e-05	0.0061261	1.8753	MIR4697HG	MIR4697 host gene
23641	-3.4352	5.8227	-4.9671	6.1434e-05	0.0061261	1.8741	LDOC1	LDOC1 regulator of NFKB signaling
126231	-3.277	6.6354	-4.9655	6.1669e-05	0.0061261	1.8706	ZNF573	zinc finger protein 573
23178	-3.0017	6.0214	-4.9641	6.1875e-05	0.0061261	1.8674	PASK	PAS domain containing serine/threonine kinase
8853	-2.7802	4.1847	-4.9623	6.2144e-05	0.0061261	1.8633	ASAP2	"ArfGAP with SH3 domain, ankyrin repeat and PH domain 2"
10981	2.4585	11.838	4.9586	6.2694e-05	0.0061454	1.8551	RAB32	"RAB32, member RAS oncogene family"
79652	-2.6134	7.6638	-4.9473	6.4403e-05	0.006233	1.8298	TMEM204	transmembrane protein 204
388228	-4.536	6.0974	-4.9471	6.4434e-05	0.006233	1.8294	SBK1	SH3 domain binding kinase 1
4094	-2.485	8.404	-4.9456	6.4665e-05	0.006233	1.826	MAF	MAF bZIP transcription factor
56477	-3.1393	3.8813	-4.9429	6.5081e-05	0.0062384	1.82	CCL28	C-C motif chemokine ligand 28
8530	2.7207	13.856	4.935	6.633e-05	0.0063112	1.8021	CST7	cystatin F
622	-3.0395	5.7014	-4.9335	6.6568e-05	0.0063112	1.7988	BDH1	3-hydroxybutyrate dehydrogenase 1
51161	-3.4018	5.8235	-4.9147	6.9621e-05	0.0065395	1.7567	C3orf18	chromosome 3 open reading frame 18
166	-3.5402	11.072	-4.9141	6.973e-05	0.0065395	1.7552	TLE5	"TLE family member 5, transcriptional modulator"
6352	-4.7932	9.547	-4.8971	7.2623e-05	0.0067518	1.717	CCL5	C-C motif chemokine ligand 5
6095	-5.1307	7.1144	-4.8962	7.2772e-05	0.0067518	1.7151	RORA	RAR related orphan receptor A
80864	-2.5232	5.8278	-4.8918	7.3543e-05	0.0067871	1.7052	EGFL8	EGF like domain multiple 8
2323	-2.8646	6.9493	-4.8821	7.527e-05	0.0069097	1.6834	FLT3LG	fms related receptor tyrosine kinase 3 ligand
800	-3.0039	4.4224	-4.8779	7.6029e-05	0.0069426	1.674	CALD1	caldesmon 1
155066	-2.5311	4.5923	-4.8655	7.8336e-05	0.0070918	1.6459	ATP6V0E2	ATPase H+ transporting V0 subunit e2
4145	-3.0483	6.2101	-4.8647	7.848e-05	0.0070918	1.6441	MATK	megakaryocyte-associated tyrosine kinase
3248	3.834	8.3249	4.8625	7.8895e-05	0.0070924	1.6392	HPGD	15-hydroxyprostaglandin dehydrogenase
10578	-4.5671	8.6915	-4.8507	8.1144e-05	0.0072309	1.6128	GNLY	granulysin
27087	-4.0459	5.2168	-4.8492	8.1455e-05	0.0072309	1.6092	B3GAT1	"beta-1,3-glucuronyltransferase 1"
239	-3.4362	5.3566	-4.8467	8.1945e-05	0.0072309	1.6036	ALOX12	"arachidonate 12-lipoxygenase, 12S type"
5567	-3.9919	6.2435	-4.8451	8.2255e-05	0.0072309	1.6	PRKACB	protein kinase cAMP-activated catalytic subunit beta
1731	-3.6369	6.0823	-4.8423	8.2797e-05	0.0072309	1.5939	SEPTIN1	septin 1
53831	4.1445	10.397	4.8405	8.3163e-05	0.0072309	1.5897	GPR84	G protein-coupled receptor 84
100652883	-2.9158	3.7755	-4.8395	8.3353e-05	0.0072309	1.5876	ALOX15P1	arachidonate 15-lipoxygenase pseudogene 1
439949	-3.8022	7.9836	-4.8332	8.4634e-05	0.0073054	1.5732	PRKCQ-AS1	PRKCQ antisense RNA 1
6157	-2.5975	4.2341	-4.818	8.7774e-05	0.007539	1.539	RPL27A	ribosomal protein L27a
387357	-4.594	6.3619	-4.8115	8.9151e-05	0.0076195	1.5244	THEMIS	thymocyte selection associated
55545	-3.0742	5.1841	-4.804	9.0755e-05	0.0077187	1.5076	MSX2P1	msh homeobox 2 pseudogene 1
221481	3.1583	5.4867	4.7947	9.2811e-05	0.007855	1.4866	ARMC12	armadillo repeat containing 12
3267	2.5547	11	4.7785	9.6493e-05	0.008127	1.4501	AGFG1	ArfGAP with FG repeats 1
729288	-3.5216	5.1464	-4.7725	9.7892e-05	0.0082049	1.4365	ZNF286B	zinc finger protein 286B (pseudogene)
2162	-3.0378	8.4002	-4.7663	9.9355e-05	0.0082875	1.4226	F13A1	coagulation factor XIII A chain
165631	-3.3262	4.4548	-4.7521	0.0001028	0.0085337	1.3906	PARP15	poly(ADP-ribose) polymerase family member 15
395	-2.7421	3.4447	-4.7402	0.00010579	0.0087142	1.3637	ARHGAP6	Rho GTPase activating protein 6
8724	2.4385	13.79	4.7393	0.00010601	0.0087142	1.3617	SNX3	sorting nexin 3
5226	2.4763	13.731	4.736	0.00010685	0.0087142	1.3543	PGD	phosphogluconate dehydrogenase
2907	2.8111	12.352	4.7355	0.00010698	0.0087142	1.3531	GRINA	glutamate ionotropic receptor NMDA type subunit associated protein 1
6691	-3.0725	4.3981	-4.733	0.00010762	0.0087252	1.3476	SPINK2	serine peptidase inhibitor Kazal type 2
132001	-3.0106	7.6392	-4.7261	0.00010942	0.0088092	1.332	TAMM41	TAM41 mitochondrial translocator assembly and maintenance homolog
55086	-3.2293	4.2284	-4.7252	0.00010967	0.0088092	1.3298	RADX	"RPA1 related single stranded DNA binding protein, X-linked"
83700	-2.9175	2.8797	-4.7209	0.00011081	0.0088599	1.3201	JAM3	junctional adhesion molecule 3
57121	-2.6607	3.9163	-4.7164	0.000112	0.0088742	1.3101	LPAR5	lysophosphatidic acid receptor 5
123606	-3.8498	5.8646	-4.7164	0.00011201	0.0088742	1.31	NIPA1	NIPA magnesium transporter 1
60468	-2.8873	4.8424	-4.7096	0.00011385	0.0089778	1.2947	BACH2	BTB domain and CNC homolog 2
9452	-4.2343	8.7528	-4.7077	0.00011436	0.0089778	1.2905	ITM2A	integral membrane protein 2A
2053	-2.8394	6.3679	-4.7024	0.00011583	0.0090406	1.2785	EPHX2	epoxide hydrolase 2
57493	-3.3546	7.4142	-4.7011	0.0001162	0.0090406	1.2755	HEG1	heart development protein with EGF like domains 1
51276	-2.7304	4.4441	-4.6981	0.00011703	0.0090649	1.2688	ZNF571	zinc finger protein 571
7915	-2.6946	4.0249	-4.6959	0.00011765	0.009068	1.2638	ALDH5A1	aldehyde dehydrogenase 5 family member A1
3131	-2.4206	3.7732	-4.6943	0.00011812	0.009068	1.2601	HLF	"HLF transcription factor, PAR bZIP family member"
100289678	-3.4535	5.4063	-4.69	0.00011934	0.0091213	1.2505	ZNF783	zinc finger family member 783
353345	2.6115	8.1952	4.6867	0.0001203	0.0091546	1.2429	GPR141	G protein-coupled receptor 141
940	-2.1974	7.1957	-4.6802	0.00012218	0.0092242	1.2284	CD28	CD28 molecule
3841	-2.1701	4.1599	-4.6799	0.00012228	0.0092242	1.2276	KPNA5	karyopherin subunit alpha 5
10810	-3.1716	3.2307	-4.6723	0.00012452	0.0093528	1.2105	WASF3	WASP family member 3
10609	-2.6566	5.2733	-4.6688	0.00012558	0.0093913	1.2026	P3H4	prolyl 3-hydroxylase family member 4 (inactive)
387895	-2.3562	5.0422	-4.6641	0.00012702	0.0094584	1.1919	LINC00944	long intergenic non-protein coding RNA 944
8725	-2.8422	6.3657	-4.6621	0.00012763	0.009463	1.1874	URI1	URI1 prefoldin like chaperone
126917	-2.8163	8.3003	-4.6558	0.00012956	0.0095437	1.1733	IFFO2	intermediate filament family orphan 2
22909	-2.1755	6.6234	-4.654	0.00013014	0.0095437	1.1691	FAN1	FANCD2 and FANCI associated nuclease 1
4211	-2.8423	4.5386	-4.6532	0.00013037	0.0095437	1.1674	MEIS1	Meis homeobox 1
51466	-3.0564	10.755	-4.6482	0.00013197	0.0096133	1.156	EVL	Enah/Vasp-like
51206	-2.598	5.4249	-4.6467	0.00013242	0.0096133	1.1527	GP6	glycoprotein VI platelet
2865	3.3657	10.555	4.6317	0.00013731	0.0099267	1.1187	FFAR3	free fatty acid receptor 3
84725	-3.1554	3.8644	-4.6243	0.00013976	0.010062	1.1021	PLEKHA8	pleckstrin homology domain containing A8
85414	-3.516	6.286	-4.6193	0.00014144	0.010116	1.0908	SLC45A3	solute carrier family 45 member 3
100130938	-2.9064	6.3072	-4.6187	0.00014168	0.010116	1.0893	100130938	NA
9402	-2.9645	4.9445	-4.6147	0.00014302	0.010165	1.0804	GRAP2	GRB2 related adaptor protein 2
3081	-2.351	6.3539	-4.6132	0.00014354	0.010165	1.077	HGD	"homogentisate 1,2-dioxygenase"
5783	-3.2925	4.6562	-4.6114	0.00014416	0.010167	1.073	PTPN13	protein tyrosine phosphatase non-receptor type 13
56160	-2.8318	5.4355	-4.6093	0.00014491	0.010179	1.0681	NSMCE3	"NSE3 homolog, SMC5-SMC6 complex component"
30009	-3.8913	7.8295	-4.6053	0.00014629	0.010234	1.0592	TBX21	T-box transcription factor 21
54843	-3.5295	6.0126	-4.597	0.00014925	0.010364	1.0404	SYTL2	synaptotagmin like 2
87178	-2.4365	6.6085	-4.5968	0.00014934	0.010364	1.0398	PNPT1	polyribonucleotide nucleotidyltransferase 1
7100	2.221	11.156	4.5909	0.00015148	0.010471	1.0264	TLR5	toll like receptor 5
53637	-3.7734	5.3569	-4.5882	0.00015246	0.010481	1.0204	S1PR5	sphingosine-1-phosphate receptor 5
4068	-2.9731	6.174	-4.587	0.00015288	0.010481	1.0178	SH2D1A	SH2 domain containing 1A
692058	-2.7746	7.4537	-4.5855	0.00015344	0.010481	1.0144	SNORD11	"small nucleolar RNA, C/D box 11"
2296	2.2978	7.0728	4.5814	0.00015497	0.010544	1.005	FOXC1	forkhead box C1
30815	-2.6861	6.0791	-4.5756	0.00015716	0.010651	0.99187	ST6GALNAC6	"ST6 N-acetylgalactosaminide alpha-2,6-sialyltransferase 6"
23035	-2.6359	5.1729	-4.5729	0.00015819	0.010679	0.98574	PHLPP2	PH domain and leucine rich repeat protein phosphatase 2
7294	-2.8197	6.1661	-4.5652	0.00016112	0.010835	0.96851	TXK	TXK tyrosine kinase
8445	-3.3478	7.0398	-4.5615	0.00016259	0.010854	0.95998	DYRK2	dual specificity tyrosine phosphorylation regulated kinase 2
59277	-2.3243	3.632	-4.5613	0.00016266	0.010854	0.95957	NTN4	netrin 4
29969	-3.6564	6.3201	-4.5585	0.00016376	0.01087	0.95324	MDFIC	MyoD family inhibitor domain containing
84836	-3.5276	5.8608	-4.5575	0.00016414	0.01087	0.95106	ABHD14B	abhydrolase domain containing 14B
100820829	-2.2889	3.6617	-4.5529	0.00016599	0.010919	0.94052	MYZAP	myocardial zonula adherens protein
8292	-2.5734	4.2152	-4.5525	0.00016615	0.010919	0.93964	COLQ	collagen like tail subunit of asymmetric acetylcholinesterase
285440	-3.1155	3.8828	-4.55	0.00016715	0.010943	0.93401	CYP4V2	cytochrome P450 family 4 subfamily V member 2
1123	-2.4325	4.3565	-4.5428	0.00017006	0.011092	0.91778	CHN1	chimerin 1
128346	2.7038	13.467	4.5354	0.00017313	0.01125	0.901	C1orf162	chromosome 1 open reading frame 162
56253	-3.2229	5.3177	-4.5303	0.00017528	0.011348	0.88937	CRTAM	cytotoxic and regulatory T cell molecule
917	-4.7705	8.309	-4.5265	0.0001769	0.011409	0.88077	CD3G	CD3g molecule
79884	-2.4356	3.6588	-4.5243	0.00017784	0.011422	0.87579	MAP9	microtubule associated protein 9
3560	-4.3004	9.0561	-4.5229	0.0001784	0.011422	0.87282	IL2RB	interleukin 2 receptor subunit beta
7220	-3.1107	3.3163	-4.5204	0.00017949	0.011441	0.86708	TRPC1	transient receptor potential cation channel subfamily C member 1
158219	-2.6746	5.5562	-4.5192	0.00018002	0.011441	0.86432	TTC39B	tetratricopeptide repeat domain 39B
10418	-2.6069	3.5037	-4.5169	0.00018101	0.011462	0.85916	SPON1	spondin 1
9806	-2.2276	10.955	-4.5081	0.00018492	0.011667	0.83912	SPOCK2	"SPARC (osteonectin), cwcv and kazal like domains proteoglycan 2"
57110	-2.4892	4.0603	-4.5008	0.00018816	0.011802	0.82279	PLAAT1	phospholipase A and acyltransferase 1
163255	-2.3854	3.4858	-4.4989	0.00018903	0.011802	0.81848	ZNF540	zinc finger protein 540
162239	-2.91	4.5525	-4.4988	0.0001891	0.011802	0.81813	ZFP1	ZFP1 zinc finger protein
21	-2.3458	4.3566	-4.4844	0.00019575	0.012173	0.78565	ABCA3	ATP binding cassette subfamily A member 3
100131657	2.4935	6.2318	4.479	0.00019831	0.012288	0.77344	100131657	NA
9781	-3.328	5.0457	-4.4739	0.00020081	0.012389	0.76172	RNF144A	ring finger protein 144A
54680	-3.6988	5.4646	-4.472	0.00020172	0.012389	0.75744	ZNHIT6	zinc finger HIT-type containing 6
83888	-4.7427	5.7184	-4.4712	0.00020208	0.012389	0.7558	FGFBP2	fibroblast growth factor binding protein 2
5287	-3.1702	7.5467	-4.4697	0.00020281	0.01239	0.75241	PIK3C2B	phosphatidylinositol-4-phosphate 3-kinase catalytic subunit type 2 beta
115	-3.7492	5.0077	-4.4657	0.0002048	0.012468	0.74323	ADCY9	adenylate cyclase 9
8714	-2.8351	5.5909	-4.4608	0.00020723	0.012541	0.73215	ABCC3	ATP binding cassette subfamily C member 3
1662	-2.7885	6.2287	-4.4604	0.00020745	0.012541	0.73116	DDX10	DEAD-box helicase 10
152926	-2.4944	6.3595	-4.4566	0.00020934	0.012576	0.72266	PPM1K	"protein phosphatase, Mg2+/Mn2+ dependent 1K"
79658	-3.068	4.4366	-4.4559	0.00020967	0.012576	0.72114	ARHGAP10	Rho GTPase activating protein 10
4052	-2.3883	3.8619	-4.4549	0.0002102	0.012576	0.7188	LTBP1	latent transforming growth factor beta binding protein 1
444	2.8613	11.119	4.4524	0.00021146	0.012608	0.71316	ASPH	aspartate beta-hydroxylase
149628	-4.3311	4.9526	-4.4441	0.00021574	0.012777	0.69437	PYHIN1	pyrin and HIN domain family member 1
93058	-3.1653	6.0026	-4.4432	0.00021619	0.012777	0.6924	COQ10A	coenzyme Q10A
152789	-3.8588	5.3884	-4.4426	0.0002165	0.012777	0.69105	JAKMIP1	janus kinase and microtubule interacting protein 1
100507486	-2.3592	3.9484	-4.4366	0.0002197	0.012922	0.67727	100507486	NA
596	-2.491	8.1527	-4.4327	0.00022175	0.012984	0.66857	BCL2	BCL2 apoptosis regulator
51348	-3.8721	6.439	-4.4317	0.00022227	0.012984	0.66638	KLRF1	killer cell lectin like receptor F1
54602	-3.0453	4.1898	-4.4297	0.00022337	0.013005	0.66173	NDFIP2	Nedd4 family interacting protein 2
123283	-3.2577	4.4964	-4.4263	0.00022522	0.013069	0.65399	TARS3	threonyl-tRNA synthetase 3
64092	2.689	14.049	4.42	0.00022864	0.013192	0.63982	SAMSN1	"SAM domain, SH3 domain and nuclear localization signals 1"
158584	-2.863	5.1019	-4.4191	0.00022914	0.013192	0.63778	FAAH2	fatty acid amide hydrolase 2
55605	-2.4287	3.4973	-4.4182	0.00022963	0.013192	0.63578	KIF21A	kinesin family member 21A
6920	-3.1762	4.2114	-4.4167	0.0002305	0.013199	0.63222	TCEA3	transcription elongation factor A3
79730	3.9994	11.206	4.4103	0.00023409	0.013344	0.61774	NSUN7	NOP2/Sun RNA methyltransferase family member 7
729911	2.6823	7.7506	4.4094	0.00023457	0.013344	0.61579	ANKRD34C-AS1	ANKRD34C antisense RNA 1
26773	-2.2682	6.9219	-4.4078	0.00023546	0.013351	0.61223	SNORD4A	"small nucleolar RNA, C/D box 4A"
728743	-2.8126	6.7643	-4.4059	0.00023654	0.013368	0.60794	LOC728743	zinc finger protein pseudogene
117608	-2.6328	4.6881	-4.3928	0.00024413	0.013741	0.57831	ZNF354B	zinc finger protein 354B
8111	-3.1687	6.8995	-4.3918	0.00024473	0.013741	0.57601	GPR68	G protein-coupled receptor 68
100131043	2.4893	8.5491	4.3903	0.00024566	0.013749	0.57244	100131043	NA
115752	-2.1691	7.0408	-4.3884	0.00024679	0.013768	0.56814	DIS3L	DIS3 like exosome 3'-5' exoribonuclease
60487	-2.5279	5.0578	-4.3839	0.00024943	0.013831	0.55815	TRMT11	tRNA methyltransferase 11 homolog
80212	-2.2425	7.9576	-4.3838	0.00024951	0.013831	0.55785	CCDC92	coiled-coil domain containing 92
79683	-2.2342	6.175	-4.3793	0.00025225	0.013938	0.54757	ZDHHC14	zinc finger DHHC-type palmitoyltransferase 14
140606	-2.4715	6.408	-4.3735	0.0002558	0.014089	0.53447	SELENOM	selenoprotein M
143888	-2.7181	4.3286	-4.3672	0.00025972	0.01426	0.5202	POGLUT3	protein O-glucosyltransferase 3
643418	2.6241	10.405	4.3549	0.00026751	0.014641	0.49245	LIPN	lipase family member N
4548	-3.0897	5.3742	-4.3498	0.00027087	0.014747	0.48073	MTR	5-methyltetrahydrofolate-homocysteine methyltransferase
55363	-2.951	5.2656	-4.3494	0.00027113	0.014747	0.47982	HEMGN	hemogen
259215	-3.603	5.0748	-4.347	0.00027266	0.014784	0.47454	LY6G6F	lymphocyte antigen 6 family member G6F
5243	-2.4508	4.2518	-4.3424	0.00027572	0.014903	0.46407	ABCB1	ATP binding cassette subfamily B member 1
84131	-3.2635	5.8939	-4.338	0.00027866	0.015015	0.45415	CEP78	centrosomal protein 78
9729	-2.2291	3.9706	-4.3339	0.00028143	0.015117	0.44484	KIAA0408	KIAA0408
8926	-3.3526	6.7037	-4.3234	0.00028869	0.015459	0.42096	SNURF	SNRPN upstream reading frame
6894	-2.97	6.669	-4.3146	0.00029483	0.015739	0.40119	TARBP1	TAR (HIV-1) RNA binding protein 1
987	-2.7097	7.1432	-4.3108	0.00029755	0.015829	0.39258	LRBA	LPS responsive beige-like anchor protein
55752	-3.7791	5.5746	-4.3097	0.00029833	0.015829	0.39011	SEPTIN11	septin 11
100129399	-3.2856	4.4694	-4.3068	0.00030047	0.015848	0.3834	100129399	NA
23336	-3.0652	4.2001	-4.3067	0.00030052	0.015848	0.38326	SYNM	synemin
340542	-2.5696	5.2799	-4.3014	0.00030437	0.016003	0.37131	BEX5	brain expressed X-linked 5
22914	-4.3836	5.212	-4.2972	0.00030748	0.016092	0.36177	KLRK1	killer cell lectin like receptor K1
25845	-2.7782	6.4501	-4.2966	0.00030792	0.016092	0.36043	PP7080	uncharacterized LOC25845
221002	2.431	9.1119	4.2945	0.0003095	0.016126	0.35563	RASGEF1A	RasGEF domain family member 1A
23180	-3.8524	7.8354	-4.285	0.00031665	0.016449	0.33419	RFTN1	"raftlin, lipid raft linker 1"
9788	-3.0988	6.4371	-4.2835	0.00031785	0.016462	0.33064	MTSS1	MTSS I-BAR domain containing 1
7089	-2.4983	5.2661	-4.2766	0.00032316	0.016647	0.31511	TLE2	"TLE family member 2, transcriptional corepressor"
29904	-2.5135	7.8188	-4.2753	0.0003242	0.016647	0.31211	EEF2K	eukaryotic elongation factor 2 kinase
4674	-2.3208	4.5559	-4.2751	0.00032431	0.016647	0.31179	NAP1L2	nucleosome assembly protein 1 like 2
9832	-2.8668	4.5454	-4.2721	0.00032667	0.016665	0.30499	JAKMIP2	janus kinase and microtubule interacting protein 2
54847	-2.8196	6.6496	-4.2719	0.00032682	0.016665	0.30455	SIDT1	SID1 transmembrane family member 1
54700	-2.1576	6.1826	-4.271	0.00032754	0.016665	0.30248	RRN3	"RRN3 homolog, RNA polymerase I transcription factor"
84418	3.2121	15.857	4.2662	0.00033138	0.016811	0.29154	CYSTM1	cysteine rich transmembrane module containing 1
9880	-2.4883	3.5062	-4.2634	0.00033363	0.016868	0.28521	ZBTB39	zinc finger and BTB domain containing 39
5608	2.4932	11.697	4.2624	0.00033443	0.016868	0.28294	MAP2K6	mitogen-activated protein kinase kinase 6
83891	-2.7322	5.1805	-4.2598	0.00033651	0.016923	0.27715	SNX25	sorting nexin 25
144348	-3.4187	6.9544	-4.2577	0.00033822	0.01696	0.27239	ZNF664	zinc finger protein 664
125488	-2.0189	7.8509	-4.2564	0.00033934	0.016967	0.2693	TTC39C	tetratricopeptide repeat domain 39C
288	-2.1904	4.9075	-4.2514	0.00034342	0.017121	0.25808	ANK3	ankyrin 3
92106	-2.1003	6.6534	-4.2482	0.00034607	0.017204	0.25087	OXNAD1	oxidoreductase NAD binding domain containing 1
2888	-2.506	4.8684	-4.2455	0.00034837	0.017269	0.24464	GRB14	growth factor receptor bound protein 14
23171	-2.3504	6.9024	-4.2433	0.00035019	0.01731	0.23977	GPD1L	glycerol-3-phosphate dehydrogenase 1 like
83464	2.1747	12.516	4.2308	0.00036091	0.017755	0.21148	APH1B	"aph-1 homolog B, gamma-secretase subunit"
10681	-3.0015	4.8529	-4.2299	0.00036175	0.017755	0.2093	GNB5	G protein subunit beta 5
8722	-2.3096	7.4918	-4.2293	0.00036227	0.017755	0.20795	CTSF	cathepsin F
586	3.1267	8.8267	4.2256	0.00036546	0.017798	0.19974	BCAT1	branched chain amino acid transaminase 1
915	-3.2868	10.578	-4.2249	0.00036612	0.017798	0.19805	CD3D	CD3d molecule
254428	-3.1382	5.641	-4.2248	0.00036621	0.017798	0.19781	SLC41A1	solute carrier family 41 member 1
25893	-2.6205	7.8823	-4.223	0.00036782	0.017826	0.19369	TRIM58	tripartite motif containing 58
201633	-2.5073	5.7743	-4.2198	0.00037065	0.017913	0.1865	TIGIT	T cell immunoreceptor with Ig and ITIM domains
100130078	2.4041	8.9543	4.2159	0.00037415	0.017994	0.17769	100130078	NA
27010	2.2075	10.94	4.2156	0.00037439	0.017994	0.17708	TPK1	thiamin pyrophosphokinase 1
112840	-2.3442	4.1001	-4.2103	0.00037925	0.018177	0.16499	WDR89	WD repeat domain 89
9317	-3.1315	4.3727	-4.2078	0.00038156	0.018237	0.15929	PTER	phosphotriesterase related
7637	-2.3175	6.0614	-4.2053	0.00038388	0.018298	0.15362	ZNF84	zinc finger protein 84
348035	-2.3146	3.0784	-4.203	0.00038602	0.018349	0.14839	348035	NA
246734	-2.7849	2.9253	-4.2007	0.00038816	0.018401	0.14321	246734	NA
643733	-2.8832	6.3018	-4.1991	0.00038962	0.01842	0.13969	CASP17P	"caspase 17, pseudogene"
54977	-3.0533	5.8658	-4.1954	0.0003931	0.018533	0.13135	SLC25A38	solute carrier family 25 member 38
22954	-2.3164	4.1135	-4.1938	0.00039462	0.018554	0.12775	TRIM32	tripartite motif containing 32
57633	2.9191	7.7112	4.1904	0.00039793	0.018645	0.1199	LRRN1	leucine rich repeat neuronal 1
3738	-2.5061	6.3324	-4.1896	0.00039868	0.018645	0.11813	KCNA3	potassium voltage-gated channel subfamily A member 3
1521	-3.3584	6.9442	-4.1855	0.00040268	0.018781	0.10879	CTSW	cathepsin W
6854	2.3524	7.7145	4.1836	0.00040452	0.018816	0.1045	SYN2	synapsin II
85376	-3.2634	4.9436	-4.1822	0.00040584	0.018827	0.10146	RIMBP3	RIMS binding protein 3
643	-3.225	6.3351	-4.1791	0.00040893	0.01892	0.094332	CXCR5	C-X-C motif chemokine receptor 5
100129637	-2.8693	7.1181	-4.1751	0.00041285	0.01905	0.085408	100129637	NA
11041	-2.9049	4.0736	-4.165	0.00042305	0.019469	0.062508	B4GAT1	"beta-1,4-glucuronyltransferase 1"
719	2.8222	12.604	4.1616	0.00042656	0.019545	0.054779	C3AR1	complement C3a receptor 1
64425	-2.0004	4.4112	-4.1602	0.000428	0.019545	0.051613	POLR1E	RNA polymerase I subunit E
6272	2.0706	11.564	4.1601	0.00042807	0.019545	0.05146	SORT1	sortilin 1
3250	3.0658	12.846	4.1542	0.00043422	0.019722	0.038082	HPR	haptoglobin-related protein
196527	-2.705	7.6642	-4.1542	0.00043423	0.019722	0.038056	ANO6	anoctamin 6
5613	-3.3023	6.867	-4.1521	0.00043639	0.019769	0.033407	PRKX	protein kinase X-linked
9254	-2.4563	5.3044	-4.1501	0.00043856	0.019815	0.028773	CACNA2D2	calcium voltage-gated channel auxiliary subunit alpha2delta 2
3458	-3.7404	4.3872	-4.1465	0.00044234	0.019934	0.020726	IFNG	interferon gamma
55556	-2.9687	6.4395	-4.1444	0.00044459	0.019946	0.015969	ENOSF1	enolase superfamily member 1
55622	-2.7716	7.3465	-4.1441	0.0004449	0.019946	0.015307	TTC27	tetratricopeptide repeat domain 27
203286	-2.5311	6.5022	-4.1409	0.00044835	0.020004	0.0080714	ANKS6	ankyrin repeat and sterile alpha motif domain containing 6
23353	-2.4326	6.1203	-4.1408	0.00044851	0.020004	0.0077329	SUN1	Sad1 and UNC84 domain containing 1
387104	-2.4702	2.8457	-4.136	0.0004537	0.020184	-0.0030481	SOGA3	SOGA family member 3
7293	-2.2187	7.0359	-4.1331	0.00045688	0.020273	-0.0095829	TNFRSF4	TNF receptor superfamily member 4
57659	-2.3801	8.2312	-4.1304	0.00045993	0.020357	-0.015832	ZBTB4	zinc finger and BTB domain containing 4
7570	-2.7746	7.7091	-4.1279	0.00046271	0.020373	-0.021467	ZNF22	zinc finger protein 22
1880	-3.2937	9.492	-4.1276	0.00046304	0.020373	-0.022147	GPR183	G protein-coupled receptor 183
3823	-3.7949	5.3308	-4.1254	0.00046544	0.020373	-0.026981	KLRC3	killer cell lectin like receptor C3
5790	-3.1088	8.0636	-4.125	0.00046592	0.020373	-0.027959	PTPRCAP	protein tyrosine phosphatase receptor type C associated protein
100288432	2.8583	10.248	4.1248	0.00046617	0.020373	-0.028464	IL10RB-DT	IL10RB divergent transcript
23244	2.9036	12.427	4.1224	0.00046883	0.020401	-0.033784	PDS5A	PDS5 cohesin associated factor A
7580	-2.9019	4.6555	-4.1221	0.00046915	0.020401	-0.034439	ZNF32	zinc finger protein 32
10613	2.1071	7.6394	4.1186	0.0004732	0.020525	-0.042489	ERLIN1	ER lipid raft associated 1
57732	-2.2536	5.5302	-4.117	0.00047496	0.02055	-0.045959	ZFYVE28	zinc finger FYVE-type containing 28
5775	-3.0748	6.9477	-4.1156	0.0004766	0.02057	-0.049196	PTPN4	protein tyrosine phosphatase non-receptor type 4
7840	-2.4191	5.6877	-4.1138	0.00047862	0.020604	-0.053164	ALMS1	ALMS1 centrosome and basal body associated protein
654434	-2.1522	6.309	-4.1128	0.00047977	0.020604	-0.055404	SNHG20	small nucleolar RNA host gene 20
147947	-2.2298	5.053	-4.1051	0.00048885	0.020942	-0.072975	ZNF542P	"zinc finger protein 542, pseudogene"
1493	-3.1038	6.4051	-4.102	0.0004925	0.021047	-0.079951	CTLA4	cytotoxic T-lymphocyte associated protein 4
7675	-2.6615	3.7659	-4.1006	0.00049417	0.021066	-0.083109	ZNF121	zinc finger protein 121
1635	-2.2664	6.412	-4.0957	0.00050003	0.021216	-0.094161	DCTD	dCMP deaminase
3990	-2.577	3.2949	-4.0954	0.00050033	0.021216	-0.09472	LIPC	"lipase C, hepatic type"
660	3.5254	10.681	4.0936	0.00050259	0.021216	-0.098941	BMX	BMX non-receptor tyrosine kinase
142940	-3.5108	4.4502	-4.0932	0.00050305	0.021216	-0.099801	TRUB1	TruB pseudouridine synthase family member 1
60385	-2.3957	4.4833	-4.0916	0.00050503	0.021216	-0.10348	TSKS	testis specific serine kinase substrate
726	-2.337	4.9754	-4.0916	0.00050503	0.021216	-0.10349	CAPN5	calpain 5
121551	-3.0386	5.6525	-4.09	0.00050695	0.021245	-0.10704	BTBD11	BTB domain containing 11
23731	-2.0833	6.8314	-4.0848	0.0005134	0.021458	-0.11888	TMEM245	transmembrane protein 245
55013	-3.5384	8.4244	-4.0839	0.00051449	0.021458	-0.12087	MCUB	mitochondrial calcium uniporter dominant negative subunit beta
4673	-2.1028	10.54	-4.081	0.00051811	0.021522	-0.12743	NAP1L1	nucleosome assembly protein 1 like 1
29997	-2.3845	12.157	-4.0806	0.00051852	0.021522	-0.12817	NOP53	NOP53 ribosome biogenesis factor
3945	-3.7077	10.649	-4.0785	0.00052117	0.021581	-0.13296	LDHB	lactate dehydrogenase B
257101	-3.1457	6.6958	-4.0746	0.00052609	0.021732	-0.14175	ZNF683	zinc finger protein 683
306	3.0859	14.841	4.0708	0.00053102	0.021853	-0.15049	ANXA3	annexin A3
3240	3.4762	14.066	4.0704	0.00053154	0.021853	-0.15141	HP	haptoglobin
4088	-2.4109	8.6168	-4.0653	0.00053812	0.022072	-0.16293	SMAD3	SMAD family member 3
7125	-2.2863	6.6336	-4.0641	0.00053966	0.022083	-0.16562	TNNC2	"troponin C2, fast skeletal type"
56950	-2.228	7.8619	-4.0611	0.00054354	0.022189	-0.17232	SMYD2	SET and MYND domain containing 2
84417	-2.2852	3.563	-4.0509	0.000557	0.022654	-0.19524	ECRG4	ECRG4 augurin precursor
55296	-2.2948	4.1309	-4.0505	0.00055755	0.022654	-0.19615	TBC1D19	TBC1 domain family member 19
100885850	-2.4488	5.7365	-4.049	0.00055965	0.022687	-0.19967	PTGES3L-AARSD1	PTGES3L-AARSD1 readthrough
8778	2.4829	11.395	4.0447	0.0005654	0.022852	-0.20924	SIGLEC5	sialic acid binding Ig like lectin 5
10864	2.1972	9.5949	4.044	0.00056637	0.022852	-0.21085	SLC22A7	solute carrier family 22 member 7
81606	-2.6955	7.493	-4.0379	0.0005748	0.023139	-0.2247	LBH	LBH regulator of WNT signaling pathway
51474	-2.8998	5.9372	-4.035	0.0005788	0.023246	-0.23119	LIMA1	LIM domain and actin binding 1
338440	-2.1035	5.9361	-4.0329	0.00058176	0.023311	-0.23596	ANO9	anoctamin 9
9284	-3.2205	5.9277	-4.0311	0.00058429	0.023358	-0.24003	NPIPA1	nuclear pore complex interacting protein family member A1
56953	-2.9083	7.6594	-4.0276	0.00058922	0.023419	-0.24789	NT5M	"5',3'-nucleotidase, mitochondrial"
3001	-4.4832	9.9928	-4.0262	0.00059118	0.023419	-0.251	GZMA	granzyme A
64167	-3.5983	8.6785	-4.0254	0.00059239	0.023419	-0.25292	ERAP2	endoplasmic reticulum aminopeptidase 2
79864	-1.7236	3.3684	-4.0253	0.00059251	0.023419	-0.25311	JHY	junctional cadherin complex regulator
3315	-3.0048	8.0063	-4.0246	0.00059346	0.023419	-0.2546	HSPB1	heat shock protein family B (small) member 1
8836	2.2301	9.975	4.0243	0.00059392	0.023419	-0.25533	GGH	gamma-glutamyl hydrolase
126014	1.8155	13.187	4.0216	0.00059786	0.023498	-0.26152	OSCAR	osteoclast associated Ig-like receptor
6443	-2.6079	3.3467	-4.0211	0.00059861	0.023498	-0.2627	SGCB	sarcoglycan beta
11098	-2.8247	5.0108	-4.0153	0.00060698	0.023764	-0.2757	PRSS23	serine protease 23
90956	-2.1328	3.6065	-4.0145	0.00060813	0.023764	-0.27747	ADCK2	aarF domain containing kinase 2
9289	-4.4817	9.1316	-4.0063	0.00062022	0.024065	-0.2959	ADGRG1	adhesion G protein-coupled receptor G1
23259	-1.9294	5.6288	-4.0062	0.00062045	0.024065	-0.29624	DDHD2	DDHD domain containing 2
23212	-3.5195	6.663	-4.0061	0.00062065	0.024065	-0.29655	RRS1	ribosome biogenesis regulator 1 homolog
1432	2.3317	11.529	4.0056	0.00062139	0.024065	-0.29766	MAPK14	mitogen-activated protein kinase 14
27284	2.3367	11.551	4.0042	0.00062337	0.024088	-0.30064	SULT1B1	sulfotransferase family 1B member 1
5005	4.0752	13.186	4.0025	0.000626	0.024136	-0.30458	ORM2	orosomucoid 2
27347	-3.739	5.8387	-4.0012	0.0006279	0.024155	-0.30742	STK39	serine/threonine kinase 39
145567	-2.4185	7.6669	-4.0001	0.00062961	0.024163	-0.30996	TTC7B	tetratricopeptide repeat domain 7B
195827	-2.4878	6.2998	-3.9993	0.00063087	0.024163	-0.31184	PRXL2C	peroxiredoxin like 2C
57085	2.2338	12.01	3.9981	0.00063264	0.024177	-0.31446	AGTRAP	angiotensin II receptor associated protein
25894	-2.1679	6.2705	-3.9957	0.00063636	0.024266	-0.31994	PLEKHG4	pleckstrin homology and RhoGEF domain containing G4
57683	-2.2119	4.1018	-3.9918	0.00064237	0.024441	-0.32874	ZDBF2	zinc finger DBF-type containing 2
79695	-2.3974	4.3256	-3.9904	0.00064445	0.024467	-0.33177	GALNT12	polypeptide N-acetylgalactosaminyltransferase 12
10455	-2.9874	7.5368	-3.9865	0.00065062	0.024647	-0.34068	ECI2	enoyl-CoA delta isomerase 2
54900	-2.9255	4.4025	-3.9843	0.00065406	0.024673	-0.34562	LAX1	lymphocyte transmembrane adaptor 1
100132948	2.3669	9.0245	3.9835	0.00065533	0.024673	-0.34743	FAM27C	family with sequence similarity 27 member C
6283	2.127	17.316	3.9833	0.00065558	0.024673	-0.3478	S100A12	S100 calcium binding protein A12
79608	-2.301	3.352	-3.9801	0.00066066	0.02481	-0.35501	RIC3	RIC3 acetylcholine receptor chaperone
127253	-2.7219	3.6577	-3.9786	0.00066317	0.024851	-0.35856	TYW3	tRNA-yW synthesizing protein 3 homolog
134864	2.0829	3.5582	3.9766	0.00066622	0.024871	-0.36286	TAAR1	trace amine associated receptor 1
8787	-2.2742	4.4075	-3.9759	0.00066735	0.024871	-0.36445	RGS9	regulator of G protein signaling 9
10131	-3.1404	4.3835	-3.9755	0.000668	0.024871	-0.36536	TRAP1	TNF receptor associated protein 1
7226	2.3991	9.4022	3.9743	0.00066996	0.02489	-0.3681	TRPM2	transient receptor potential cation channel subfamily M member 2
646862	2.4054	9.9568	3.9717	0.0006742	0.024977	-0.374	RNF225	ring finger protein 225
64219	-2.1114	7.6956	-3.9711	0.00067517	0.024977	-0.37535	PJA1	praja ring finger ubiquitin ligase 1
55825	2.5207	9.2924	3.9674	0.00068115	0.025092	-0.3836	PECR	peroxisomal trans-2-enoyl-CoA reductase
55972	2.0012	9.0998	3.9674	0.00068117	0.025092	-0.38362	SLC25A40	solute carrier family 25 member 40
326625	-2.2699	3.8043	-3.9635	0.00068757	0.025274	-0.39238	MMAB	metabolism of cobalamin associated B
55188	-2.3451	5.1065	-3.958	0.00069683	0.025514	-0.40489	RIC8B	RIC8 guanine nucleotide exchange factor B
157285	-2.3054	8.0144	-3.9579	0.00069704	0.025514	-0.40518	PRAG1	"PEAK1 related, kinase-activating pseudokinase 1"
5004	4.0413	14.172	3.9562	0.00069982	0.025557	-0.4089	ORM1	orosomucoid 1
5730	-3.2727	8.7576	-3.9554	0.00070115	0.025557	-0.41067	PTGDS	prostaglandin D2 synthase
266812	-2.1331	5.3897	-3.9527	0.00070575	0.02567	-0.41679	NAP1L5	nucleosome assembly protein 1 like 5
653583	-1.9916	6.238	-3.9516	0.00070772	0.025688	-0.4194	PHLDB3	pleckstrin homology like domain family B member 3
2131	2.3946	8.4067	3.9493	0.0007116	0.025696	-0.42452	EXT1	exostosin glycosyltransferase 1
284406	-1.9898	4.1411	-3.9487	0.00071257	0.025696	-0.42579	ZFP82	ZFP82 zinc finger protein
4609	-2.6689	7.5858	-3.9486	0.00071275	0.025696	-0.42603	MYC	"MYC proto-oncogene, bHLH transcription factor"
1236	-3.5947	9.9739	-3.948	0.00071385	0.025696	-0.42747	CCR7	C-C motif chemokine receptor 7
23416	2.5464	15.157	3.9442	0.00072042	0.025878	-0.43604	KCNH3	potassium voltage-gated channel subfamily H member 3
1604	2.147	14.505	3.9421	0.00072392	0.025939	-0.44058	CD55	CD55 molecule (Cromer blood group)
90233	-2.0676	5.0333	-3.9406	0.00072659	0.025939	-0.44402	ZNF551	zinc finger protein 551
10149	2.989	3.9821	3.94	0.0007276	0.025939	-0.44532	ADGRG2	adhesion G protein-coupled receptor G2
50624	-2.44	3.587	-3.9392	0.00072906	0.025939	-0.4472	CUZD1	CUB and zona pellucida like domains 1
5533	-2.642	8.5383	-3.9389	0.00072957	0.025939	-0.44785	PPP3CC	protein phosphatase 3 catalytic subunit gamma
10152	-3.0204	5.4258	-3.9376	0.00073194	0.025949	-0.45088	ABI2	abl interactor 2
9235	-2.3994	9.673	-3.9371	0.00073286	0.025949	-0.45206	IL32	interleukin 32
79100	1.8086	9.563	3.9353	0.00073587	0.025976	-0.45589	LINC00626	long intergenic non-protein coding RNA 626
55906	-2.3131	5.9863	-3.9349	0.0007366	0.025976	-0.45682	ZC4H2	zinc finger C4H2-type containing
23564	2.3673	13.701	3.9339	0.0007384	0.025986	-0.4591	DDAH2	dimethylarginine dimethylaminohydrolase 2
5996	-3.414	8.8006	-3.9318	0.00074216	0.026034	-0.46385	RGS1	regulator of G protein signaling 1
81579	-2.251	6.2909	-3.9315	0.00074275	0.026034	-0.46459	PLA2G12A	phospholipase A2 group XIIA
10128	-2.8382	5.8548	-3.9267	0.00075141	0.026253	-0.47544	LRPPRC	leucine rich pentatricopeptide repeat containing
969	-3.6011	8.9995	-3.9263	0.00075202	0.026253	-0.4762	CD69	CD69 molecule
63947	-2.1722	3.9953	-3.9247	0.000755	0.026264	-0.4799	DMRTC1	DMRT like family C1
10150	-3.0814	5.9889	-3.9242	0.00075591	0.026264	-0.48103	MBNL2	muscleblind like splicing regulator 2
3983	-2.1459	8.8438	-3.9231	0.00075795	0.026264	-0.48355	ABLIM1	actin binding LIM protein 1
605	-2.898	4.9115	-3.9221	0.00075973	0.026264	-0.48573	BCL7A	BAF chromatin remodeling complex subunit BCL7A
168537	-3.2465	9.133	-3.922	0.00075991	0.026264	-0.48596	GIMAP7	"GTPase, IMAP family member 7"
9644	-1.9904	6.0447	-3.9208	0.00076213	0.026288	-0.48869	SH3PXD2A	SH3 and PX domains 2A
136259	2.532	5.4136	3.9177	0.00076771	0.026428	-0.4955	KLF14	Kruppel like factor 14
10826	-2.3232	8.0863	-3.9167	0.00076961	0.026441	-0.49782	FAXDC2	fatty acid hydroxylase domain containing 2
375248	-2.4211	7.2199	-3.9157	0.00077152	0.026446	-0.50014	ANKRD36	ankyrin repeat domain 36
51480	2.52	6.6709	3.915	0.0007728	0.026446	-0.50169	VCX2	variable charge X-linked 2
23305	-2.7874	4.5048	-3.9127	0.00077712	0.026508	-0.5069	ACSL6	acyl-CoA synthetase long chain family member 6
10243	-2.9946	4.6395	-3.9118	0.00077872	0.026508	-0.50882	GPHN	gephyrin
1517	1.9806	12.967	3.9116	0.0007792	0.026508	-0.5094	CTSLP2	cathepsin L pseudogene 2
29967	-2.4071	3.838	-3.9091	0.00078386	0.0266	-0.51497	LRP12	LDL receptor related protein 12
154761	1.884	6.3164	3.9085	0.00078497	0.0266	-0.5163	LOC154761	"family with sequence similarity 115, member C pseudogene"
5037	-2.6694	9.0213	-3.9024	0.00079654	0.026887	-0.52999	PEBP1	phosphatidylethanolamine binding protein 1
3695	-3.0633	10.518	-3.9024	0.00079655	0.026887	-0.52999	ITGB7	integrin subunit beta 7
550643	-2.6794	8.4105	-3.9004	0.0008004	0.026965	-0.5345	NBDY	negative regulator of P-body association
56288	-1.9423	4.5554	-3.8979	0.00080522	0.027075	-0.54012	PARD3	par-3 family cell polarity regulator
100130428	-2.1588	3.7478	-3.895	0.0008109	0.027138	-0.54668	100130428	NA
414328	2.5231	11.377	3.8942	0.00081243	0.027138	-0.54845	IDNK	IDNK gluconokinase
100505564	2.5454	7.7529	3.8938	0.00081327	0.027138	-0.54942	100505564	NA
1264	-2.3305	3.3562	-3.8937	0.00081335	0.027138	-0.5495	CNN1	calponin 1
864	-2.6931	11.645	-3.8909	0.00081888	0.027161	-0.55585	RUNX3	RUNX family transcription factor 3
375346	2.4043	10.318	3.8905	0.0008198	0.027161	-0.5569	STIMATE	STIM activating enhancer
91624	-2.1151	5.967	-3.8896	0.00082144	0.027161	-0.55876	NEXN	nexilin F-actin binding protein
25914	-2.874	4.5065	-3.8891	0.0008224	0.027161	-0.55985	RTTN	rotatin
7122	-2.6238	5.9274	-3.8883	0.00082407	0.027161	-0.56175	CLDN5	claudin 5
55705	-2.6476	3.4249	-3.8881	0.00082446	0.027161	-0.56219	IPO9	importin 9
54477	-2.1305	3.3774	-3.8878	0.00082501	0.027161	-0.56282	PLEKHA5	pleckstrin homology domain containing A5
5196	-3.565	11.066	-3.8869	0.00082681	0.027169	-0.56485	PF4	platelet factor 4
3770	-2.2963	5.1641	-3.8853	0.00083002	0.027223	-0.56847	KCNJ14	potassium inwardly rectifying channel subfamily J member 14
7561	-1.9106	7.1059	-3.8795	0.00084168	0.027474	-0.58151	ZNF14	zinc finger protein 14
84707	-2.0852	8.9358	-3.8792	0.00084239	0.027474	-0.5823	BEX2	brain expressed X-linked 2
353514	2.5037	12.105	3.8791	0.00084242	0.027474	-0.58234	LILRA5	leukocyte immunoglobulin like receptor A5
340508	-2.9424	5.847	-3.8763	0.00084812	0.027608	-0.58864	GAS2L1P2	growth arrest specific 2 like 1 pseudogene 2
337968	2.3337	10.693	3.8738	0.00085324	0.027657	-0.59427	KRTAP6-3	keratin associated protein 6-3
55246	-2.1914	5.9848	-3.8733	0.00085425	0.027657	-0.59538	CCDC25	coiled-coil domain containing 25
6480	-2.508	10.816	-3.8731	0.00085476	0.027657	-0.59593	ST6GAL1	"ST6 beta-galactoside alpha-2,6-sialyltransferase 1"
57185	-2.0189	7.3444	-3.8725	0.00085601	0.027657	-0.5973	NIPAL3	NIPA like domain containing 3
2999	-4.2836	9.9227	-3.8704	0.00086022	0.027727	-0.60188	GZMH	granzyme H
115352	-2.3208	3.2757	-3.8699	0.00086137	0.027727	-0.60313	FCRL3	Fc receptor like 3
151963	-1.8576	4.7627	-3.8686	0.00086395	0.02773	-0.60592	MB21D2	Mab-21 domain containing 2
26031	-3.3822	6.1117	-3.8683	0.00086467	0.02773	-0.60671	OSBPL3	oxysterol binding protein like 3
150864	-2.1172	7.7424	-3.8643	0.00087293	0.027772	-0.61559	FAM117B	family with sequence similarity 117 member B
2793	-2.381	6.0727	-3.8641	0.00087335	0.027772	-0.61604	GNGT2	G protein subunit gamma transducin 2
90488	-2.5797	7.0885	-3.8641	0.00087349	0.027772	-0.61619	TMEM263	transmembrane protein 263
26090	-2.1493	4.5288	-3.8639	0.00087384	0.027772	-0.61657	ABHD12	abhydrolase domain containing 12
84519	-2.1943	9.878	-3.8638	0.00087398	0.027772	-0.61671	ACRBP	acrosin binding protein
100506965	-2.8185	4.5026	-3.8624	0.00087702	0.027818	-0.61996	PWAR6	Prader Willi/Angelman region RNA 6
54894	-2.3861	4.1963	-3.8612	0.00087946	0.027844	-0.62256	RNF43	ring finger protein 43
55274	-2.3181	7.4294	-3.8602	0.00088158	0.027861	-0.62481	PHF10	PHD finger protein 10
9727	-1.9294	6.8973	-3.8575	0.0008873	0.027978	-0.63085	RAB11FIP3	RAB11 family interacting protein 3
22883	-3.0641	7.5954	-3.8564	0.00088965	0.027978	-0.63332	CLSTN1	calsyntenin 1
81563	-3.0875	4.9373	-3.8562	0.00089015	0.027978	-0.63384	C1orf21	chromosome 1 open reading frame 21
9696	-1.9986	6.368	-3.8534	0.00089612	0.028115	-0.64009	CROCC	"ciliary rootlet coiled-coil, rootletin"
57553	-1.7266	4.4052	-3.852	0.00089923	0.028162	-0.64333	MICAL3	"microtubule associated monooxygenase, calponin and LIM domain containing 3"
9984	-2.6032	4.5363	-3.8495	0.00090468	0.028281	-0.64897	THOC1	THO complex 1
7098	-1.9302	3.7544	-3.8442	0.00091622	0.028461	-0.66082	TLR3	toll like receptor 3
79722	1.9139	8.9241	3.844	0.00091674	0.028461	-0.66134	ANKRD55	ankyrin repeat domain 55
317762	-1.8011	4.5816	-3.8436	0.00091764	0.028461	-0.66226	CCDC85C	coiled-coil domain containing 85C
55558	-2.5258	7.2833	-3.8431	0.00091867	0.028461	-0.66331	PLXNA3	plexin A3
22915	-2.3994	4.7811	-3.8427	0.00091963	0.028461	-0.66429	MMRN1	multimerin 1
80008	-2.5784	4.6384	-3.8424	0.00092028	0.028461	-0.66494	TMEM156	transmembrane protein 156
10943	1.8034	11.258	3.839	0.0009277	0.02864	-0.67245	MSL3	MSL complex subunit 3
64860	-2.2331	6.4333	-3.8305	0.00094688	0.029165	-0.69157	ARMCX5	armadillo repeat containing X-linked 5
92521	-2.3181	8.6586	-3.83	0.00094806	0.029165	-0.69274	SPECC1	sperm antigen with calponin homology and coiled-coil domains 1
57060	-1.8739	6.8178	-3.8284	0.00095159	0.029177	-0.69621	PCBP4	poly(rC) binding protein 4
2534	-3.2223	9.8296	-3.8283	0.00095183	0.029177	-0.69644	FYN	"FYN proto-oncogene, Src family tyrosine kinase"
196513	-2.1686	7.0397	-3.826	0.00095722	0.029291	-0.70171	DCP1B	decapping mRNA 1B
7267	-2.8633	7.014	-3.8234	0.00096325	0.029423	-0.70758	TTC3	tetratricopeptide repeat domain 3
100128927	-1.9031	5.8554	-3.8189	0.00097353	0.029685	-0.71749	ZBTB42	zinc finger and BTB domain containing 42
84058	-2.8873	6.4579	-3.8142	0.00098469	0.029942	-0.72814	WDR54	WD repeat domain 54
100130097	-2.1655	4.7038	-3.8132	0.00098693	0.029942	-0.73026	KIF28P	"kinesin family member 28, pseudogene"
84912	-2.513	4.2812	-3.8132	0.00098713	0.029942	-0.73045	SLC35B4	solute carrier family 35 member B4
151507	1.7553	12.335	3.8115	0.00099109	0.030009	-0.73419	MSL3P1	MSL complex subunit 3 pseudogene 1
1786	-3.0985	7.1007	-3.8092	0.00099647	0.03012	-0.73925	DNMT1	DNA methyltransferase 1
100874264	2.1744	6.7675	3.808	0.00099952	0.030159	-0.7421	AOAH-IT1	AOAH intronic transcript 1
474343	-2.0547	6.3294	-3.8067	0.0010026	0.030199	-0.74494	SPIN2B	spindlin family member 2B
79037	-3.304	8.9311	-3.8056	0.0010052	0.030214	-0.74741	PVRIG	PVR related immunoglobulin domain containing
117157	-2.3872	7.2036	-3.8051	0.0010065	0.030214	-0.74864	SH2D1B	SH2 domain containing 1B
6929	-2.6623	8.0542	-3.8031	0.0010112	0.0303	-0.75291	TCF3	transcription factor 3
84552	-1.9926	3.2632	-3.7964	0.0010276	0.030722	-0.76793	PARD6G	par-6 family cell polarity regulator gamma
4300	-2.3491	5.213	-3.7959	0.0010288	0.030722	-0.76904	MLLT3	MLLT3 super elongation complex subunit
53834	-1.8056	4.9118	-3.7909	0.0010414	0.031033	-0.78039	FGFRL1	fibroblast growth factor receptor like 1
249	2.7858	12.031	3.7903	0.0010428	0.031033	-0.78166	ALPL	"alkaline phosphatase, biomineralization associated"
24142	-1.8017	6.4863	-3.7878	0.0010492	0.031098	-0.78737	NAA80	"N-alpha-acetyltransferase 80, NatH catalytic subunit"
241	2.2855	15.692	3.7877	0.0010492	0.031098	-0.78743	ALOX5AP	arachidonate 5-lipoxygenase activating protein
90987	-2.4779	4.246	-3.7873	0.0010503	0.031098	-0.78842	ZNF251	zinc finger protein 251
56995	-3.3451	6.3019	-3.7839	0.0010589	0.031255	-0.79595	TULP4	TUB like protein 4
9540	2.2811	9.8237	3.7832	0.0010608	0.031255	-0.79762	TP53I3	tumor protein p53 inducible protein 3
56922	-2.422	8.2124	-3.783	0.0010612	0.031255	-0.79804	MCCC1	methylcrotonoyl-CoA carboxylase 1
115024	-1.9232	3.6771	-3.7824	0.0010628	0.031255	-0.79945	NT5C3B	"5'-nucleotidase, cytosolic IIIB"
129293	-1.9809	4.701	-3.7816	0.0010647	0.031256	-0.80108	TRABD2A	TraB domain containing 2A
51673	-2.3462	5.5142	-3.7783	0.0010733	0.031424	-0.80856	TPPP3	tubulin polymerization promoting protein family member 3
25864	-2.5107	8.513	-3.778	0.001074	0.031424	-0.80924	ABHD14A	abhydrolase domain containing 14A
145173	-2.2236	5.5958	-3.7756	0.0010802	0.031553	-0.81461	B3GLCT	beta 3-glucosyltransferase
134728	-2.1046	3.1999	-3.7744	0.0010834	0.03159	-0.8173	IRAK1BP1	interleukin 1 receptor associated kinase 1 binding protein 1
84128	-2.7937	7.1276	-3.7721	0.0010894	0.0317	-0.82245	WDR75	WD repeat domain 75
128872	2.2004	7.5697	3.7716	0.0010908	0.0317	-0.82367	HMGB3P1	high mobility group box 3 pseudogene 1
203427	-2.1483	5.4679	-3.7692	0.001097	0.031723	-0.82895	SLC25A43	solute carrier family 25 member 43
399972	2.6749	10.348	3.7684	0.0010991	0.031723	-0.83075	GSEC	G-quadruplex forming sequence containing lncRNA
104	-1.9537	7.3781	-3.7681	0.0011	0.031723	-0.83151	ADARB1	adenosine deaminase RNA specific B1
4507	-2.0662	5.4695	-3.768	0.0011	0.031723	-0.83155	MTAP	methylthioadenosine phosphorylase
4747	-2.1121	6.0604	-3.7678	0.0011007	0.031723	-0.83214	NEFL	neurofilament light
8030	-2.4404	7.8992	-3.7666	0.0011038	0.031735	-0.83476	CCDC6	coiled-coil domain containing 6
1318	2.053	14.112	3.7662	0.0011048	0.031735	-0.83557	SLC31A2	solute carrier family 31 member 2
5874	-2.2633	5.9051	-3.7631	0.001113	0.031872	-0.84251	RAB27B	"RAB27B, member RAS oncogene family"
9466	-2.4386	7.1579	-3.7631	0.0011132	0.031872	-0.84267	IL27RA	interleukin 27 receptor subunit alpha
79026	-3.1029	9.3204	-3.7622	0.0011156	0.031887	-0.84467	AHNAK	AHNAK nucleoprotein
631	-2.8729	4.5656	-3.7596	0.0011225	0.031978	-0.85042	BFSP1	beaded filament structural protein 1
79796	-2.3046	4.118	-3.7581	0.0011266	0.031978	-0.85382	ALG9	"ALG9 alpha-1,2-mannosyltransferase"
1992	2.0742	15.93	3.7578	0.0011274	0.031978	-0.85451	SERPINB1	serpin family B member 1
967	2.1188	16.147	3.7571	0.0011294	0.031978	-0.85613	CD63	CD63 molecule
390927	-2.1521	4.7899	-3.7569	0.0011298	0.031978	-0.85646	ZNF793	zinc finger protein 793
11251	-3.2331	5.9029	-3.7564	0.0011312	0.031978	-0.85762	PTGDR2	prostaglandin D2 receptor 2
114881	-2.4705	9.1148	-3.7562	0.0011317	0.031978	-0.85802	OSBPL7	oxysterol binding protein like 7
100532736	-1.8602	7.818	-3.7539	0.0011381	0.032107	-0.86329	MICOS10-NBL1	MICOS10-NBL1 readthrough
683	1.9587	12.875	3.7528	0.001141	0.032137	-0.86568	BST1	bone marrow stromal cell antigen 1
22885	-2.0682	4.8794	-3.7499	0.0011489	0.032306	-0.87209	ABLIM3	actin binding LIM protein family member 3
22836	-2.9197	3.6465	-3.7486	0.0011525	0.032356	-0.87503	RHOBTB3	Rho related BTB domain containing 3
51561	-2.476	7.4803	-3.7471	0.0011566	0.032419	-0.87837	IL23A	interleukin 23 subunit alpha
54674	-1.9655	6.6661	-3.7461	0.0011594	0.032445	-0.88063	LRRN3	leucine rich repeat neuronal 3
57505	-2.0831	7.1058	-3.7437	0.0011662	0.032581	-0.88603	AARS2	"alanyl-tRNA synthetase 2, mitochondrial"
92291	2.3432	7.7239	3.7424	0.0011697	0.032628	-0.88887	CAPN13	calpain 13
152579	-2.7995	6.0348	-3.7395	0.0011779	0.032752	-0.8954	SCFD2	sec1 family domain containing 2
64318	-2.4076	5.3851	-3.7395	0.0011779	0.032752	-0.89541	NOC3L	NOC3 like DNA replication regulator
975	-2.4206	9.5434	-3.7384	0.0011809	0.032783	-0.89778	CD81	CD81 molecule
28987	-2.9498	6.2445	-3.7368	0.0011855	0.032839	-0.90135	NOB1	NIN1 (RPN12) binding protein 1 homolog
10211	2.0151	14.044	3.7364	0.0011867	0.032839	-0.90235	FLOT1	flotillin 1
868	-2.7969	7.1016	-3.7345	0.001192	0.032931	-0.90646	CBLB	Cbl proto-oncogene B
2983	-2.4204	4.936	-3.7334	0.0011952	0.032967	-0.90896	GUCY1B1	guanylate cyclase 1 soluble subunit beta 1
161394	2.1025	2.8771	3.7317	0.0012002	0.033053	-0.91285	SAMD15	sterile alpha motif domain containing 15
10090	-1.9532	4.0871	-3.7292	0.0012073	0.033171	-0.9184	UST	uronyl 2-sulfotransferase
64921	-1.8647	5.1173	-3.7289	0.0012083	0.033171	-0.91915	CASD1	CAS1 domain containing 1
124401	-1.9216	7.9785	-3.7268	0.0012142	0.033256	-0.92372	ANKS3	ankyrin repeat and sterile alpha motif domain containing 3
80745	-2.4148	5.2962	-3.7259	0.0012168	0.033256	-0.92568	THUMPD2	THUMP domain containing 2
58478	-2.4848	7.189	-3.7258	0.0012171	0.033256	-0.92594	ENOPH1	enolase-phosphatase 1
29909	-2.1294	8.8843	-3.7215	0.0012299	0.033551	-0.93565	GPR171	G protein-coupled receptor 171
23344	-2.0621	8.0723	-3.7189	0.0012377	0.03371	-0.94153	ESYT1	extended synaptotagmin 1
64172	-2.9188	4.8426	-3.7158	0.0012468	0.033905	-0.94837	OSGEPL1	O-sialoglycoprotein endopeptidase like 1
64598	1.9867	10.111	3.7136	0.0012533	0.033978	-0.95328	MOSPD3	motile sperm domain containing 3
1021	-2.589	7.8178	-3.7136	0.0012534	0.033978	-0.95328	CDK6	cyclin dependent kinase 6
3067	-3.0056	8.0038	-3.7122	0.0012576	0.03404	-0.95646	HDC	histidine decarboxylase
375033	-1.9577	3.0663	-3.7065	0.0012749	0.034454	-0.96917	PEAR1	platelet endothelial aggregation receptor 1
9805	-2.2907	6.516	-3.7016	0.0012897	0.0348	-0.97994	SCRN1	secernin 1
117155	-2.0063	5.7225	-3.6992	0.0012972	0.034948	-0.98534	CATSPER2	cation channel sperm associated 2
8857	-1.9984	6.3615	-3.6982	0.0013005	0.034983	-0.98774	FCGBP	Fc fragment of IgG binding protein
113612	-1.967	4.9225	-3.6965	0.0013055	0.03503	-0.99133	CYP2U1	cytochrome P450 family 2 subfamily U member 1
93210	-1.9259	7.6096	-3.6963	0.0013063	0.03503	-0.99187	PGAP3	post-GPI attachment to proteins phospholipase 3
57198	-1.8441	4.3241	-3.6944	0.0013124	0.035139	-0.99621	ATP8B2	ATPase phospholipid transporting 8B2
5080	2.6054	6.7869	3.6933	0.0013156	0.035171	-0.9985	PAX6	paired box 6
9497	-2.3905	6.239	-3.6908	0.0013237	0.035333	-1.0042	SLC4A7	solute carrier family 4 member 7
3993	-2.0175	8.8545	-3.6888	0.00133	0.035371	-1.0086	LLGL2	LLGL scribble cell polarity complex component 2
3384	-2.2965	11.022	-3.6887	0.0013304	0.035371	-1.0089	ICAM2	intercellular adhesion molecule 2
55893	-2.397	8.9033	-3.6884	0.0013313	0.035371	-1.0095	ZNF395	zinc finger protein 395
441381	-1.7723	5.4214	-3.6873	0.0013347	0.035409	-1.0119	LRRC24	leucine rich repeat containing 24
125228	-2.4189	4.8732	-3.6856	0.0013402	0.0355	-1.0158	FAM210A	family with sequence similarity 210 member A
64328	-2.8442	4.8931	-3.6818	0.0013525	0.035731	-1.0243	XPO4	exportin 4
23062	-2.7168	7.3292	-3.6816	0.0013531	0.035731	-1.0246	GGA2	"golgi associated, gamma adaptin ear containing, ARF binding protein 2"
151278	2.9872	3.3478	3.679	0.0013616	0.035901	-1.0305	CCDC140	CCDC140 lncRNA
5019	-3.6228	5.9673	-3.6771	0.0013677	0.035962	-1.0347	OXCT1	3-oxoacid CoA-transferase 1
9531	-2.4799	4.1403	-3.6764	0.0013701	0.035962	-1.0363	BAG3	BAG cochaperone 3
6693	-3.1298	5.8693	-3.6764	0.0013701	0.035962	-1.0363	SPN	sialophorin
84527	-2.2994	5.7005	-3.6756	0.0013727	0.035977	-1.0381	ZNF559	zinc finger protein 559
118932	3.1723	9.4512	3.6705	0.0013896	0.036365	-1.0495	ANKRD22	ankyrin repeat domain 22
5313	2.2561	8.2049	3.6665	0.0014029	0.036633	-1.0584	PKLR	pyruvate kinase L/R
80739	-1.7957	8.1036	-3.6661	0.0014041	0.036633	-1.0592	MPIG6B	megakaryocyte and platelet inhibitory receptor G6b
203260	-2.0526	8.7877	-3.6641	0.0014109	0.036755	-1.0636	CCDC107	coiled-coil domain containing 107
1429	-2.6073	5.0689	-3.6598	0.0014256	0.037081	-1.0733	CRYZ	crystallin zeta
116236	-2.6534	4.9945	-3.6592	0.0014277	0.037081	-1.0747	ABHD15	abhydrolase domain containing 15
57194	-2.6076	6.3136	-3.6583	0.0014307	0.037103	-1.0766	ATP10A	ATPase phospholipid transporting 10A (putative)
26873	2.5766	11.168	3.6568	0.0014358	0.037181	-1.08	OPLAH	"5-oxoprolinase, ATP-hydrolysing"
80018	-2.1228	5.7521	-3.6547	0.0014428	0.037307	-1.0845	NAA25	"N-alpha-acetyltransferase 25, NatB auxiliary subunit"
57343	-1.8104	5.0145	-3.6507	0.0014569	0.037615	-1.0936	ZNF304	zinc finger protein 304
730092	-1.9102	4.8322	-3.6468	0.0014704	0.037878	-1.1021	RRN3P1	RRN3 pseudogene 1
92912	-2.3612	8.2835	-3.6459	0.0014735	0.037878	-1.1041	UBE2Q2	ubiquitin conjugating enzyme E2 Q2
26253	2.6226	10.35	3.6457	0.0014742	0.037878	-1.1045	CLEC4E	C-type lectin domain family 4 member E
1207	-2.616	9.1178	-3.6449	0.001477	0.037878	-1.1063	CLNS1A	chloride nucleotide-sensitive channel 1A
51299	3.0215	5.6837	3.6441	0.00148	0.037878	-1.1082	NRN1	neuritin 1
9829	-2.0997	3.2742	-3.644	0.0014802	0.037878	-1.1083	DNAJC6	DnaJ heat shock protein family (Hsp40) member C6
150771	-2.2878	4.9796	-3.6417	0.0014885	0.038036	-1.1136	ITPRIPL1	ITPRIP like 1
10316	-2.3018	6.7284	-3.6398	0.0014951	0.038148	-1.1177	NMUR1	neuromedin U receptor 1
64168	3.2887	3.5841	3.6363	0.0015079	0.038417	-1.1256	NECAB1	N-terminal EF-hand calcium binding protein 1
4778	2.0014	16.225	3.6345	0.0015143	0.038525	-1.1296	NFE2	"nuclear factor, erythroid 2"
2352	3.6544	12.099	3.629	0.0015345	0.03898	-1.1419	FOLR3	folate receptor gamma
114791	-2.0054	4.1197	-3.625	0.0015492	0.039295	-1.1507	TUBGCP5	tubulin gamma complex associated protein 5
4329	-1.6596	6.8499	-3.621	0.0015641	0.039579	-1.1597	ALDH6A1	aldehyde dehydrogenase 6 family member A1
1939	-2.1875	6.1828	-3.6207	0.0015649	0.039579	-1.1601	EIF2D	eukaryotic translation initiation factor 2D
8869	-2.5031	6.4695	-3.6199	0.0015679	0.039597	-1.1619	ST3GAL5	"ST3 beta-galactoside alpha-2,3-sialyltransferase 5"
824	-2.8579	10.997	-3.6187	0.0015726	0.039658	-1.1647	CAPN2	calpain 2
283149	-1.7696	6.9924	-3.6173	0.0015779	0.039733	-1.1678	BCL9L	BCL9 like
64231	2.4546	11.901	3.6124	0.0015962	0.039995	-1.1786	MS4A6A	membrane spanning 4-domains A6A
648	-2.2359	6.2046	-3.6123	0.0015969	0.039995	-1.179	BMI1	"BMI1 proto-oncogene, polycomb ring finger"
677770	2.4905	13.42	3.612	0.0015977	0.039995	-1.1795	SCARNA22	small Cajal body-specific RNA 22
87769	-1.9228	4.852	-3.6119	0.0015982	0.039995	-1.1797	GGACT	gamma-glutamylamine cyclotransferase
11326	3.2005	8.6703	3.6115	0.0015998	0.039995	-1.1807	VSIG4	V-set and immunoglobulin domain containing 4
51602	-2.1762	10.347	-3.6099	0.0016059	0.040091	-1.1842	NOP58	NOP58 ribonucleoprotein
80177	-2.1517	4.2679	-3.6077	0.0016144	0.040219	-1.1891	MYCT1	MYC target 1
132789	-1.9526	5.9462	-3.607	0.0016171	0.040219	-1.1907	GNPDA2	glucosamine-6-phosphate deaminase 2
23642	-2.0032	8.1361	-3.6065	0.001619	0.040219	-1.1918	SNHG1	small nucleolar RNA host gene 1
28984	-2.0896	9.3346	-3.6057	0.001622	0.040219	-1.1935	RGCC	regulator of cell cycle
26996	1.9849	12.722	3.6055	0.0016227	0.040219	-1.1939	GPR160	G protein-coupled receptor 160
58191	2.2515	12.029	3.6049	0.0016252	0.040225	-1.1954	CXCL16	C-X-C motif chemokine ligand 16
79006	-2.3314	7.7641	-3.6021	0.0016361	0.040349	-1.2016	METRN	"meteorin, glial cell differentiation regulator"
7597	-1.7728	6.951	-3.602	0.0016364	0.040349	-1.2018	ZBTB25	zinc finger and BTB domain containing 25
11277	-2.0125	10.231	-3.6018	0.0016372	0.040349	-1.2022	TREX1	three prime repair exonuclease 1
2530	-2.6117	5.9968	-3.601	0.0016404	0.040371	-1.204	FUT8	fucosyltransferase 8
9026	-2.1813	8.1131	-3.5981	0.0016519	0.040595	-1.2105	HIP1R	huntingtin interacting protein 1 related
10915	-2.2771	5.6314	-3.596	0.0016601	0.040727	-1.2151	TCERG1	transcription elongation regulator 1
4063	-1.8891	8.1448	-3.5951	0.0016635	0.040727	-1.217	LY9	lymphocyte antigen 9
23076	-2.8782	6.061	-3.5944	0.0016665	0.040727	-1.2187	RRP1B	ribosomal RNA processing 1B
3646	-1.9119	12.006	-3.5943	0.0016666	0.040727	-1.2188	EIF3E	eukaryotic translation initiation factor 3 subunit E
994	-2.6099	8.5645	-3.585	0.001704	0.041506	-1.2394	CDC25B	cell division cycle 25B
166929	2.7134	6.9834	3.585	0.0017043	0.041506	-1.2395	SGMS2	sphingomyelin synthase 2
131450	-1.8176	4.4844	-3.5843	0.001707	0.041506	-1.241	CD200R1	CD200 receptor 1
894	-2.195	8.9266	-3.584	0.0017081	0.041506	-1.2416	CCND2	cyclin D2
26094	-2.26	4.9536	-3.5815	0.0017184	0.041699	-1.2472	DCAF4	DDB1 and CUL4 associated factor 4
84181	-1.8648	6.2381	-3.5807	0.0017218	0.041723	-1.2491	CHD6	chromodomain helicase DNA binding protein 6
1308	3.0822	5.6669	3.5757	0.0017424	0.042162	-1.2601	COL17A1	collagen type XVII alpha 1 chain
10663	-2.6026	4.634	-3.5733	0.0017522	0.042338	-1.2654	CXCR6	C-X-C motif chemokine receptor 6
154796	-1.6754	3.4895	-3.5728	0.0017545	0.042338	-1.2666	AMOT	angiomotin
4072	3.7232	6.3832	3.5697	0.0017674	0.042588	-1.2734	EPCAM	epithelial cell adhesion molecule
10808	-3.0106	7.3167	-3.5665	0.001781	0.042858	-1.2805	HSPH1	heat shock protein family H (Hsp110) member 1
11346	2.1578	10.899	3.5645	0.0017893	0.042998	-1.2848	SYNPO	synaptopodin
10742	1.7693	6.6761	3.5591	0.0018128	0.043426	-1.297	RAI2	retinoic acid induced 2
100130733	2.1274	9.5558	3.5589	0.0018136	0.043426	-1.2974	LRRC70	leucine rich repeat containing 70
283742	-1.8667	3.5644	-3.5581	0.001817	0.043426	-1.2991	FAM98B	family with sequence similarity 98 member B
29941	-2.9047	5.6942	-3.5581	0.0018171	0.043426	-1.2992	PKN3	protein kinase N3
1588	3.5653	4.8883	3.555	0.0018306	0.043688	-1.3061	CYP19A1	cytochrome P450 family 19 subfamily A member 1
55316	-2.0582	8.4225	-3.5532	0.0018385	0.043809	-1.3101	RSAD1	radical S-adenosyl methionine domain containing 1
113246	-2.5629	10.643	-3.5526	0.0018407	0.043809	-1.3112	C12orf57	chromosome 12 open reading frame 57
51337	-2.9383	5.9788	-3.5508	0.0018487	0.043912	-1.3152	THEM6	thioesterase superfamily member 6
10562	3.0863	9.7809	3.5503	0.001851	0.043912	-1.3163	OLFM4	olfactomedin 4
5095	-2.2178	6.208	-3.5496	0.001854	0.043912	-1.3178	PCCA	propionyl-CoA carboxylase subunit alpha
55024	-2.6015	7.4894	-3.5494	0.0018552	0.043912	-1.3185	BANK1	B cell scaffold protein with ankyrin repeats 1
22868	-2.2496	6.7955	-3.5486	0.0018587	0.043936	-1.3202	FASTKD2	FAST kinase domains 2
57507	3.5623	7.711	3.5458	0.0018711	0.044167	-1.3264	ZNF608	zinc finger protein 608
57613	-2.2009	4.1971	-3.5434	0.0018816	0.044355	-1.3316	FAM234B	family with sequence similarity 234 member B
25814	-2.5504	6.232	-3.5424	0.0018863	0.044405	-1.3339	ATXN10	ataxin 10
3178	-1.9042	11.736	-3.5418	0.0018889	0.044407	-1.3352	HNRNPA1	heterogeneous nuclear ribonucleoprotein A1
57719	-3.1841	4.3255	-3.5401	0.0018966	0.044528	-1.339	ANO8	anoctamin 8
153364	-2.114	5.3538	-3.5388	0.0019026	0.044608	-1.3419	MBLAC2	metallo-beta-lactamase domain containing 2
51537	-2.378	6.5602	-3.5333	0.0019274	0.045128	-1.3539	MTFP1	mitochondrial fission process 1
25945	-1.8211	3.5773	-3.5325	0.0019312	0.045158	-1.3558	NECTIN3	nectin cell adhesion molecule 3
3939	2.0312	13.185	3.5314	0.0019364	0.045216	-1.3583	LDHA	lactate dehydrogenase A
161291	-2.1637	4.9355	-3.5306	0.00194	0.045241	-1.36	TMEM30B	transmembrane protein 30B
23014	-2.1676	7.6469	-3.5295	0.0019451	0.045277	-1.3625	FBXO21	F-box protein 21
10538	2.1547	13.341	3.5291	0.0019468	0.045277	-1.3632	BATF	basic leucine zipper ATF-like transcription factor
729860	-2.2105	4.3773	-3.5265	0.0019591	0.045443	-1.3691	729860	NA
51678	-2.4318	3.6587	-3.5263	0.0019596	0.045443	-1.3694	MPP6	membrane palmitoylated protein 6
220992	-1.7552	3.8531	-3.5259	0.0019618	0.045443	-1.3704	ZNF485	zinc finger protein 485
5816	-1.8519	6.351	-3.5252	0.0019647	0.04545	-1.3718	PVALB	parvalbumin
653390	-1.7009	6.9738	-3.5235	0.001973	0.045582	-1.3757	RRN3P2	RRN3 pseudogene 2
11238	-2.0472	7.1606	-3.522	0.0019798	0.045595	-1.3789	CA5B	carbonic anhydrase 5B
64417	-2.4366	5.8526	-3.5218	0.001981	0.045595	-1.3794	TMEM267	transmembrane protein 267
5509	2.022	11.538	3.5217	0.0019816	0.045595	-1.3797	PPP1R3D	protein phosphatase 1 regulatory subunit 3D
10787	-2.184	4.7957	-3.5211	0.0019841	0.045595	-1.3809	NCKAP1	NCK associated protein 1
5355	2.1199	13.601	3.5204	0.0019875	0.045613	-1.3825	PLP2	proteolipid protein 2
10133	-2.7143	7.1905	-3.5169	0.0020041	0.045921	-1.3902	OPTN	optineurin
51018	-2.125	5.0081	-3.5165	0.0020062	0.045921	-1.3912	RRP15	ribosomal RNA processing 15 homolog
10217	-2.0677	5.9514	-3.5133	0.0020215	0.04621	-1.3983	CTDSPL	CTD small phosphatase like
274	-2.2299	7.6436	-3.5123	0.0020262	0.046248	-1.4004	BIN1	bridging integrator 1
55270	-1.8377	4.3521	-3.5118	0.0020285	0.046248	-1.4015	NUDT15	nudix hydrolase 15
84436	-2.2429	3.2583	-3.5106	0.0020341	0.046315	-1.404	ZNF528	zinc finger protein 528
9173	2.9012	5.8606	3.5085	0.0020446	0.046492	-1.4088	IL1RL1	interleukin 1 receptor like 1
57176	-2.3038	8.1963	-3.5051	0.002061	0.046803	-1.4162	VARS2	"valyl-tRNA synthetase 2, mitochondrial"
84866	-1.8344	5.6694	-3.5045	0.0020639	0.046808	-1.4175	TMEM25	transmembrane protein 25
158427	-1.8234	5.3784	-3.5025	0.0020737	0.046934	-1.4219	TSTD2	thiosulfate sulfurtransferase like domain containing 2
4318	3.0128	16.381	3.5023	0.0020748	0.046934	-1.4224	MMP9	matrix metallopeptidase 9
706	1.9702	17.4	3.5009	0.002082	0.046976	-1.4256	TSPO	translocator protein
2091	-2.8289	11.782	-3.5002	0.002085	0.046976	-1.427	FBL	fibrillarin
9447	1.9967	11.911	3.4995	0.0020887	0.046976	-1.4286	AIM2	absent in melanoma 2
55858	1.6461	10.577	3.4992	0.00209	0.046976	-1.4292	TMEM165	transmembrane protein 165
401152	1.7938	15.17	3.4992	0.0020902	0.046976	-1.4293	C4orf3	chromosome 4 open reading frame 3
100289410	-1.8327	5.7631	-3.4984	0.0020941	0.047001	-1.431	MCF2L-AS1	MCF2L antisense RNA 1
114804	-1.701	4.7942	-3.4954	0.0021092	0.047263	-1.4377	RNF157	ring finger protein 157
120526	-2.3776	5.4784	-3.495	0.0021112	0.047263	-1.4386	DNAJC24	DnaJ heat shock protein family (Hsp40) member C24
26278	-2.0536	6.4055	-3.4938	0.0021171	0.047334	-1.4412	SACS	sacsin molecular chaperone
4671	1.9872	13.516	3.4895	0.002139	0.047763	-1.4507	NAIP	NLR family apoptosis inhibitory protein
3460	1.67	13.228	3.4871	0.002151	0.047944	-1.4559	IFNGR2	interferon gamma receptor 2
25989	-1.7727	7.4022	-3.4868	0.0021527	0.047944	-1.4566	ULK3	unc-51 like kinase 3
256957	-1.9966	3.8458	-3.4845	0.0021644	0.048109	-1.4617	HEATR9	HEAT repeat containing 9
657	-2.0923	4.5067	-3.4843	0.0021656	0.048109	-1.4622	BMPR1A	bone morphogenetic protein receptor type 1A
23082	-1.9556	7.8581	-3.4833	0.0021706	0.048158	-1.4643	PPRC1	PPARG related coactivator 1
5184	-2.7841	8.7934	-3.4818	0.0021781	0.048224	-1.4676	PEPD	peptidase D
677815	2.0092	11.957	3.4807	0.002184	0.048224	-1.4701	SNORA2C	"small nucleolar RNA, H/ACA box 2C"
729732	1.9672	10.54	3.4804	0.0021857	0.048224	-1.4708	LOC729732	uncharacterized LOC729732
114907	-3.2697	6.3142	-3.4803	0.0021862	0.048224	-1.471	FBXO32	F-box protein 32
4927	-2.3598	7.4946	-3.4798	0.0021885	0.048224	-1.472	NUP88	nucleoporin 88
54974	-2.3623	4.7517	-3.4791	0.0021926	0.048224	-1.4737	THG1L	tRNA-histidine guanylyltransferase 1 like
1240	-3.0427	4.9181	-3.4787	0.0021945	0.048224	-1.4745	CMKLR1	chemerin chemokine-like receptor 1
55591	-2.1194	5.5561	-3.4767	0.0022047	0.048224	-1.4788	VEZT	"vezatin, adherens junctions transmembrane protein"
7741	-2.056	6.4048	-3.4766	0.0022055	0.048224	-1.4792	ZSCAN26	zinc finger and SCAN domain containing 26
90407	-1.7003	4.2004	-3.4761	0.002208	0.048224	-1.4802	TMEM41A	transmembrane protein 41A
7511	-1.658	6.2237	-3.4757	0.00221	0.048224	-1.481	XPNPEP1	X-prolyl aminopeptidase 1
90187	1.6004	9.6045	3.4749	0.0022141	0.048224	-1.4828	EMILIN3	elastin microfibril interfacer 3
8848	-2.0743	9.1597	-3.4749	0.0022144	0.048224	-1.4829	TSC22D1	TSC22 domain family member 1
57665	-2.5148	7.0634	-3.4742	0.002218	0.048224	-1.4844	RDH14	retinol dehydrogenase 14
131544	-2.5204	4.4736	-3.4738	0.00222	0.048224	-1.4852	CRYBG3	crystallin beta-gamma domain containing 3
217	2.037	12.349	3.4735	0.0022217	0.048224	-1.486	ALDH2	aldehyde dehydrogenase 2 family member
84946	-2.4064	7.3991	-3.4733	0.0022225	0.048224	-1.4863	LTV1	LTV1 ribosome biogenesis factor
9046	-2.3116	7.4646	-3.4731	0.0022236	0.048224	-1.4867	DOK2	docking protein 2
23002	-1.7878	5.4038	-3.4726	0.0022266	0.048228	-1.488	DAAM1	dishevelled associated activator of morphogenesis 1
10947	-2.5276	7.0016	-3.4717	0.002231	0.048265	-1.4898	AP3M2	adaptor related protein complex 3 subunit mu 2
54841	-2.3257	4.7385	-3.4705	0.0022374	0.04833	-1.4925	BIVM	"basic, immunoglobulin-like variable motif containing"
30008	2.1161	10.09	3.4701	0.0022396	0.04833	-1.4934	EFEMP2	EGF containing fibulin extracellular matrix protein 2
7718	-2.3974	5.8087	-3.4694	0.0022435	0.048353	-1.495	ZNF165	zinc finger protein 165
376267	-2.3968	6.6082	-3.4665	0.002259	0.048572	-1.5014	RAB15	"RAB15, member RAS oncogene family"
4267	-2.4812	8.1476	-3.4664	0.0022592	0.048572	-1.5015	CD99	CD99 molecule (Xg blood group)
8518	-1.8829	4.7828	-3.4652	0.0022658	0.048653	-1.5042	ELP1	elongator complex protein 1
55647	2.2914	9.3126	3.4639	0.0022728	0.048681	-1.5071	RAB20	"RAB20, member RAS oncogene family"
122060	-2.5521	5.6018	-3.4639	0.002273	0.048681	-1.5071	SLAIN1	SLAIN motif family member 1
729092	-1.8062	7.1309	-3.4634	0.0022755	0.048681	-1.5082	AGAP5	"ArfGAP with GTPase domain, ankyrin repeat and PH domain 5"
9868	-2.3971	4.7312	-3.4621	0.0022823	0.048695	-1.5109	TOMM70	translocase of outer mitochondrial membrane 70
100506548	-1.9963	7.0065	-3.461	0.0022883	0.048695	-1.5134	100506548	NA
134430	-2.4155	4.9535	-3.4608	0.0022898	0.048695	-1.514	WDR36	WD repeat domain 36
55268	-1.9305	10.34	-3.4607	0.00229	0.048695	-1.514	ECHDC2	enoyl-CoA hydratase domain containing 2
91	2.126	6.7849	3.4601	0.0022934	0.048695	-1.5154	ACVR1B	activin A receptor type 1B
283284	-1.7002	4.257	-3.4598	0.0022951	0.048695	-1.5161	IGSF22	immunoglobulin superfamily member 22
4014	2.157	3.6409	3.4597	0.0022958	0.048695	-1.5164	LORICRIN	loricrin cornified envelope precursor protein
201895	1.6202	11.593	3.4582	0.0023037	0.048744	-1.5196	SMIM14	small integral membrane protein 14
10000	-2.2077	6.2421	-3.458	0.0023049	0.048744	-1.5201	AKT3	AKT serine/threonine kinase 3
10939	-2.0557	4.9821	-3.4567	0.002312	0.048744	-1.5229	AFG3L2	AFG3 like matrix AAA peptidase subunit 2
2113	-2.1459	6.9151	-3.4567	0.0023123	0.048744	-1.523	ETS1	"ETS proto-oncogene 1, transcription factor"
118430	2.9271	6.4511	3.4566	0.0023125	0.048744	-1.5231	MUCL1	mucin like 1
56654	-1.8324	9.1807	-3.4556	0.0023181	0.048744	-1.5254	NPDC1	"neural proliferation, differentiation and control 1"
3732	2.2927	13.811	3.4552	0.0023204	0.048744	-1.5263	CD82	CD82 molecule
57325	-2.0519	7.2748	-3.4551	0.0023206	0.048744	-1.5264	KAT14	lysine acetyltransferase 14
56034	2.8913	9.2088	3.4543	0.0023254	0.048786	-1.5283	PDGFC	platelet derived growth factor C
55006	-2.0195	3.474	-3.4518	0.0023388	0.049008	-1.5336	TRMT61B	tRNA methyltransferase 61B
471	-3.2478	6.2929	-3.4502	0.002348	0.049142	-1.5373	ATIC	5-aminoimidazole-4-carboxamide ribonucleotide formyltransferase/IMP cyclohydrolase
55326	-2.2877	5.2339	-3.4489	0.0023552	0.049232	-1.5401	AGPAT5	1-acylglycerol-3-phosphate O-acyltransferase 5
400221	1.9666	4.7434	3.4466	0.0023678	0.049436	-1.545	FLJ22447	uncharacterized LOC400221
56983	-2.0067	6.9575	-3.4453	0.0023751	0.049469	-1.5479	POGLUT1	protein O-glucosyltransferase 1
128553	-2.2481	3.6071	-3.4453	0.0023751	0.049469	-1.5479	TSHZ2	teashirt zinc finger homeobox 2
100128276	2.1812	11.12	3.444	0.0023825	0.049562	-1.5508	LOC100128276	uncharacterized LOC100128276
56952	-1.8568	3.6289	-3.4435	0.0023853	0.049562	-1.5519	PRTFDC1	phosphoribosyl transferase domain containing 1
9533	-2.1314	6.1169	-3.4414	0.0023973	0.049753	-1.5565	POLR1C	RNA polymerase I and III subunit C
3115	-3.2736	9.9765	-3.4401	0.0024045	0.049843	-1.5593	HLA-DPB1	"major histocompatibility complex, class II, DP beta 1"
27240	-2.7401	6.3958	-3.4385	0.0024137	0.049974	-1.5629	SIT1	signaling threshold regulating transmembrane adaptor 1
7476	-1.4962	3.2514	-3.437	0.0024223	0.050091	-1.5661	WNT7A	Wnt family member 7A
9038	1.664	10.807	3.4356	0.0024304	0.050199	-1.5692	TAAR5	trace amine associated receptor 5
221421	2.5652	12.323	3.4324	0.0024488	0.050519	-1.5762	RSPH9	radial spoke head component 9
9123	1.9332	16.183	3.4318	0.0024523	0.050531	-1.5776	SLC16A3	solute carrier family 16 member 3
9933	-1.8896	7.3656	-3.4313	0.0024552	0.050532	-1.5787	PUM3	pumilio RNA binding family member 3
646424	2.1624	9.3079	3.4308	0.0024583	0.050534	-1.5798	SPINK8	serine peptidase inhibitor Kazal type 8 (putative)
817	-1.9051	5.7356	-3.4302	0.002462	0.050551	-1.5812	CAMK2D	calcium/calmodulin dependent protein kinase II delta
55333	-2.0785	6.1666	-3.4271	0.0024798	0.050856	-1.5879	SYNJ2BP	synaptojanin 2 binding protein
150726	-2.2077	8.0986	-3.4259	0.0024868	0.05094	-1.5905	FBXO41	F-box protein 41
10885	-2.1573	5.2748	-3.4254	0.0024899	0.050943	-1.5917	WDR3	WD repeat domain 3
284459	-1.7708	5.5938	-3.4238	0.0024991	0.051028	-1.5951	ZNF875	zinc finger protein 875
100506776	-2.1036	7.5106	-3.4237	0.0024999	0.051028	-1.5954	TRG-AS1	T cell receptor gamma locus antisense RNA 1
5463	-1.9335	4.9883	-3.4205	0.0025187	0.051306	-1.6023	POU6F1	POU class 6 homeobox 1
4331	-2.7178	6.1562	-3.42	0.0025218	0.051306	-1.6035	MNAT1	MNAT1 component of CDK activating kinase
115123	2.3165	7.5535	3.4199	0.0025224	0.051306	-1.6037	MARCHF3	membrane associated ring-CH-type finger 3
10161	-2.1954	8.0431	-3.4188	0.0025294	0.051333	-1.6063	LPAR6	lysophosphatidic acid receptor 6
3821	-3.0564	6.3278	-3.4187	0.0025297	0.051333	-1.6064	KLRC1	killer cell lectin like receptor C1
23408	2.0662	9.0853	3.4167	0.0025417	0.051495	-1.6107	SIRT5	sirtuin 5
6832	-1.7894	6.8891	-3.4156	0.002548	0.051495	-1.6131	SUPV3L1	Suv3 like RNA helicase
135228	-1.8666	3.7115	-3.4152	0.0025509	0.051495	-1.6141	CD109	CD109 molecule
23708	-2.3597	5.1954	-3.415	0.0025522	0.051495	-1.6146	GSPT2	G1 to S phase transition 2
8642	-1.9724	3.6037	-3.4149	0.0025525	0.051495	-1.6147	DCHS1	dachsous cadherin-related 1
91272	-1.683	7.4711	-3.4119	0.0025706	0.051799	-1.6212	BOD1	biorientation of chromosomes in cell division 1
594	-1.8187	5.474	-3.4108	0.0025773	0.051815	-1.6236	BCKDHB	branched chain keto acid dehydrogenase E1 subunit beta
51495	-2.5923	7.212	-3.4106	0.0025787	0.051815	-1.6241	HACD3	3-hydroxyacyl-CoA dehydratase 3
387723	-2.0112	5.4796	-3.4103	0.0025803	0.051815	-1.6247	C10orf143	chromosome 10 open reading frame 143
50628	-1.7573	6.5709	-3.4098	0.0025838	0.051826	-1.626	GEMIN4	gem nuclear organelle associated protein 4
5468	2.4427	4.5255	3.4071	0.0026	0.05209	-1.6318	PPARG	peroxisome proliferator activated receptor gamma
5860	-2.0306	5.2203	-3.4051	0.0026127	0.052239	-1.6363	QDPR	quinoid dihydropteridine reductase
55365	-1.6031	6.9594	-3.4049	0.0026134	0.052239	-1.6366	TMEM176A	transmembrane protein 176A
925	-2.5807	9.5019	-3.4041	0.0026185	0.052271	-1.6383	CD8A	CD8a molecule
54865	-1.9888	5.5436	-3.4037	0.0026211	0.052271	-1.6393	GPATCH4	G-patch domain containing 4
5393	-1.9265	9.2536	-3.4029	0.0026263	0.052314	-1.6411	EXOSC9	exosome component 9
321	-2.0489	5.4065	-3.4001	0.0026438	0.052543	-1.6473	APBA2	amyloid beta precursor protein binding family A member 2
4953	-1.9564	10.156	-3.3999	0.002645	0.052543	-1.6477	ODC1	ornithine decarboxylase 1
26053	-1.9253	7.7051	-3.3995	0.0026471	0.052543	-1.6484	AUTS2	activator of transcription and developmental regulator AUTS2
4436	-2.5366	6.5741	-3.3991	0.0026499	0.052543	-1.6494	MSH2	mutS homolog 2
7374	-2.8156	7.5028	-3.3982	0.0026551	0.052587	-1.6512	UNG	uracil DNA glycosylase
26517	-1.91	4.2596	-3.3971	0.0026624	0.052659	-1.6538	TIMM13	translocase of inner mitochondrial membrane 13
100505774	1.8473	6.9822	3.3963	0.0026674	0.052659	-1.6555	LOC100505774	uncharacterized LOC100505774
8569	1.9173	12.504	3.3956	0.0026716	0.052659	-1.6569	MKNK1	MAPK interacting serine/threonine kinase 1
2258	3.0239	9.9749	3.395	0.0026758	0.052659	-1.6584	FGF13	fibroblast growth factor 13
54941	-2.7509	7.9296	-3.3948	0.0026768	0.052659	-1.6588	RNF125	ring finger protein 125
93622	-1.6602	8.5026	-3.3941	0.0026814	0.052659	-1.6603	LOC93622	Morf4 family associated protein 1 like 1 pseudogene
728039	-1.9476	3.8183	-3.3939	0.0026828	0.052659	-1.6608	SSR4P1	signal sequence receptor subunit 4 pseudogene 1
57465	-2.2474	4.0346	-3.3938	0.002683	0.052659	-1.6609	TBC1D24	TBC1 domain family member 24
81839	-2.5553	5.4474	-3.3932	0.002687	0.052669	-1.6623	VANGL1	VANGL planar cell polarity protein 1
79623	3.2762	12.444	3.392	0.0026945	0.052669	-1.6649	GALNT14	polypeptide N-acetylgalactosaminyltransferase 14
55248	-2.5291	5.9172	-3.3919	0.002695	0.052669	-1.665	PACC1	proton activated chloride channel 1
7169	-1.7368	8.2655	-3.3911	0.0027001	0.052669	-1.6668	TPM2	tropomyosin 2
494513	-1.5985	3.7051	-3.3905	0.0027041	0.052669	-1.6682	PJVK	pejvakin
55454	1.9933	11.579	3.3904	0.0027045	0.052669	-1.6683	CSGALNACT2	chondroitin sulfate N-acetylgalactosaminyltransferase 2
57521	-3.1998	7.1059	-3.3904	0.0027048	0.052669	-1.6684	RPTOR	regulatory associated protein of MTOR complex 1
23107	-2.1164	6.1306	-3.3895	0.0027106	0.052723	-1.6704	MRPS27	mitochondrial ribosomal protein S27
149420	-2.0838	4.6826	-3.3889	0.0027142	0.052735	-1.6716	PDIK1L	PDLIM1 interacting kinase 1 like
29097	2.0097	13.84	3.3876	0.0027226	0.052838	-1.6745	CNIH4	cornichon family AMPA receptor auxiliary protein 4
51676	-2.4256	7.3941	-3.3851	0.0027389	0.053096	-1.68	ASB2	ankyrin repeat and SOCS box containing 2
2176	-2.0944	4.0748	-3.3837	0.0027481	0.053213	-1.6831	FANCC	FA complementation group C
6484	1.9771	9.7329	3.382	0.0027591	0.053297	-1.6868	ST3GAL4	"ST3 beta-galactoside alpha-2,3-sialyltransferase 4"
762	2.9763	11.451	3.3816	0.0027614	0.053297	-1.6876	CA4	carbonic anhydrase 4
54874	-1.624	5.2171	-3.3816	0.0027616	0.053297	-1.6877	FNBP1L	formin binding protein 1 like
124221	-2.1431	5.0575	-3.3806	0.0027679	0.053359	-1.6898	PRSS30P	"serine protease 30, pseudogene"
90355	3.0427	9.5079	3.3778	0.0027866	0.053607	-1.696	MACIR	macrophage immunometabolism regulator
100131289	-2.1466	3.2959	-3.3777	0.002787	0.053607	-1.6961	LOC100131289	uncharacterized LOC100131289
65008	-2.1666	4.5725	-3.3758	0.0027999	0.053797	-1.7004	MRPL1	mitochondrial ribosomal protein L1
56916	-2.2033	6.0725	-3.3739	0.0028123	0.053976	-1.7045	SMARCAD1	"SWI/SNF-related, matrix-associated actin-dependent regulator of chromatin, subfamily a, containing DEAD/H box 1"
653160	-2.0234	4.4282	-3.3732	0.0028172	0.054009	-1.7061	LOC653160	uncharacterized LOC653160
9508	3.3726	4.4415	3.3723	0.0028228	0.054057	-1.7079	ADAMTS3	ADAM metallopeptidase with thrombospondin type 1 motif 3
84245	-2.1828	6.9046	-3.3711	0.002831	0.054154	-1.7106	MRI1	methylthioribose-1-phosphate isomerase 1
26995	-2.8804	5.9187	-3.3703	0.0028362	0.05416	-1.7123	TRUB2	TruB pseudouridine synthase family member 2
5742	-1.7059	7.5574	-3.3701	0.0028376	0.05416	-1.7128	PTGS1	prostaglandin-endoperoxide synthase 1
85440	-1.7017	3.927	-3.3694	0.0028424	0.054192	-1.7143	DOCK7	dedicator of cytokinesis 7
11126	-2.4069	5.2381	-3.3681	0.0028511	0.0543	-1.7172	CD160	CD160 molecule
83463	1.788	12.448	3.365	0.0028716	0.054562	-1.7238	MXD3	MAX dimerization protein 3
8302	-2.392	7.6747	-3.3648	0.0028731	0.054562	-1.7243	KLRC4	killer cell lectin like receptor C4
1528	-2.1712	7.067	-3.3646	0.0028744	0.054562	-1.7247	CYB5A	cytochrome b5 type A
100499483	-2.5426	4.593	-3.3637	0.0028808	0.054591	-1.7268	CCDC180	coiled-coil domain containing 180
595100	-1.6289	5.4511	-3.363	0.0028852	0.054591	-1.7282	SNORD18C	"small nucleolar RNA, C/D box 18C"
387882	-3.373	6.6192	-3.363	0.0028853	0.054591	-1.7282	C12orf75	chromosome 12 open reading frame 75
5768	2.1645	12.666	3.3615	0.0028956	0.054727	-1.7315	QSOX1	quiescin sulfhydryl oxidase 1
11247	-2.275	3.1061	-3.3582	0.0029186	0.055005	-1.7388	NXPH4	neurexophilin 4
3824	-3.4612	6.1924	-3.3579	0.0029205	0.055005	-1.7395	KLRD1	killer cell lectin like receptor D1
246778	1.8514	8.6249	3.3578	0.0029213	0.055005	-1.7397	IL27	interleukin 27
4128	3.9557	8.9891	3.3575	0.002923	0.055005	-1.7402	MAOA	monoamine oxidase A
55718	-2.1136	7.1948	-3.3559	0.0029342	0.055155	-1.7438	POLR3E	RNA polymerase III subunit E
356	-2.7322	5.318	-3.3555	0.0029374	0.055155	-1.7448	FASLG	Fas ligand
10054	-1.7864	8.3793	-3.3539	0.002948	0.055245	-1.7481	UBA2	ubiquitin like modifier activating enzyme 2
11183	-2.8047	6.807	-3.3535	0.0029512	0.055245	-1.7491	MAP4K5	mitogen-activated protein kinase kinase kinase kinase 5
25825	-2.5684	7.407	-3.3532	0.0029532	0.055245	-1.7497	BACE2	beta-secretase 2
79073	-2.5318	8.7441	-3.3529	0.0029549	0.055245	-1.7503	TMEM109	transmembrane protein 109
5551	-2.5754	6.9977	-3.352	0.0029617	0.055312	-1.7524	PRF1	perforin 1
3693	-1.889	6.0265	-3.351	0.0029684	0.055378	-1.7545	ITGB5	integrin subunit beta 5
54802	-2.8993	5.814	-3.3494	0.0029793	0.055522	-1.7579	TRIT1	tRNA isopentenyltransferase 1
3268	-1.9492	5.1529	-3.3475	0.0029929	0.055645	-1.7621	AGFG2	ArfGAP with FG repeats 2
10314	-2.4761	5.6838	-3.3473	0.0029944	0.055645	-1.7626	LANCL1	LanC like 1
26272	-1.6256	5.5942	-3.3471	0.0029955	0.055645	-1.7629	FBXO4	F-box protein 4
6596	-2.3328	5.432	-3.3455	0.003007	0.055798	-1.7665	HLTF	helicase like transcription factor
53373	-2.1297	7.4018	-3.3428	0.0030262	0.056094	-1.7723	TPCN1	two pore segment channel 1
197407	-1.7567	6.1695	-3.3418	0.0030334	0.056135	-1.7745	ZNF48	zinc finger protein 48
84365	-1.8237	7.4786	-3.341	0.0030388	0.056135	-1.7762	NIFK	nucleolar protein interacting with the FHA domain of MKI67
29078	-2.8381	6.0615	-3.3402	0.0030445	0.056135	-1.7779	NDUFAF4	NADH:ubiquinone oxidoreductase complex assembly factor 4
8761	-1.9856	8.7471	-3.3402	0.0030449	0.056135	-1.7781	PABPC4	poly(A) binding protein cytoplasmic 4
646278	-2.3506	8.0534	-3.3401	0.0030455	0.056135	-1.7782	PDCD6IPP2	PDCD6IP pseudogene 2
2986	2.3097	3.1037	3.3398	0.0030478	0.056135	-1.7789	GUCY2F	"guanylate cyclase 2F, retinal"
4835	2.2157	12.178	3.3379	0.0030611	0.056321	-1.783	NQO2	N-ribosyldihydronicotinamide:quinone reductase 2
10970	1.9639	13.642	3.3363	0.0030726	0.056473	-1.7864	CKAP4	cytoskeleton associated protein 4
116412	-1.7067	6.6148	-3.3335	0.0030933	0.056793	-1.7927	ZNF837	zinc finger protein 837
64761	-2.0849	9.9911	-3.3319	0.003105	0.056946	-1.7961	PARP12	poly(ADP-ribose) polymerase family member 12
84671	-1.8572	4.7574	-3.3298	0.0031204	0.05713	-1.8007	ZNF347	zinc finger protein 347
55619	-2.0845	9.0109	-3.3296	0.0031216	0.05713	-1.8011	DOCK10	dedicator of cytokinesis 10
23165	-2.3586	8.6488	-3.3291	0.0031254	0.05714	-1.8022	NUP205	nucleoporin 205
140	2.5641	7.5128	3.3275	0.003137	0.057292	-1.8056	ADORA3	adenosine A3 receptor
339483	-1.7809	4.6842	-3.3255	0.0031524	0.057434	-1.8101	MTMR9LP	"myotubularin related protein 9 like, pseudogene"
79752	-1.6753	7.2069	-3.3253	0.0031537	0.057434	-1.8105	ZFAND1	zinc finger AN1-type containing 1
23241	-2.7421	5.1363	-3.3251	0.0031547	0.057434	-1.8108	PACS2	phosphofurin acidic cluster sorting protein 2
79930	1.8519	13.823	3.3234	0.0031681	0.057617	-1.8147	DOK3	docking protein 3
54739	-3.2011	9.5361	-3.3221	0.0031778	0.05767	-1.8176	XAF1	XIAP associated factor 1
52	-1.9393	8.2612	-3.3216	0.0031811	0.05767	-1.8185	ACP1	acid phosphatase 1
25943	-2.6034	5.0414	-3.3216	0.0031814	0.05767	-1.8186	C20orf194	chromosome 20 open reading frame 194
145781	-2.591	6.521	-3.3209	0.0031866	0.05767	-1.8201	GCOM1	GRINL1A complex locus 1
55149	-1.702	6.7026	-3.3207	0.0031877	0.05767	-1.8204	MTPAP	mitochondrial poly(A) polymerase
56884	2.4897	4.2997	3.3195	0.003197	0.057763	-1.8232	FSTL5	follistatin like 5
114783	-2.1072	6.157	-3.319	0.0032004	0.057763	-1.8241	LMTK3	lemur tyrosine kinase 3
1545	3.2453	11.367	3.3187	0.0032028	0.057763	-1.8248	CYP1B1	cytochrome P450 family 1 subfamily B member 1
728537	-1.6528	4.7226	-3.3152	0.0032297	0.058188	-1.8326	C2orf92	chromosome 2 open reading frame 92
6286	2.7081	17.313	3.3084	0.0032812	0.059055	-1.8472	S100P	S100 calcium binding protein P
22807	-2.0714	6.9283	-3.3068	0.0032938	0.059219	-1.8507	IKZF2	IKAROS family zinc finger 2
9975	-2.4559	5.5944	-3.3058	0.0033017	0.059301	-1.8529	NR1D2	nuclear receptor subfamily 1 group D member 2
7504	-2.5029	5.912	-3.3052	0.0033066	0.059327	-1.8543	XK	X-linked Kx blood group
90313	-1.7193	9.4014	-3.3026	0.0033267	0.059627	-1.8599	TP53I13	tumor protein p53 inducible protein 13
9487	-1.5451	5.9943	-3.3018	0.0033328	0.059675	-1.8616	PIGL	phosphatidylinositol glycan anchor biosynthesis class L
6001	-2.1777	11.89	-3.2985	0.0033587	0.060019	-1.8688	RGS10	regulator of G protein signaling 10
284751	2.712	9.7129	3.2985	0.003359	0.060019	-1.8688	LINC01270	long intergenic non-protein coding RNA 1270
79838	2.3367	3.6973	3.2964	0.0033757	0.060229	-1.8734	TMC5	transmembrane channel like 5
340205	-2.4944	5.8795	-3.2961	0.0033777	0.060229	-1.874	TREML1	triggering receptor expressed on myeloid cells like 1
23225	-2.6371	6.8332	-3.2954	0.0033831	0.060263	-1.8754	NUP210	nucleoporin 210
9823	-1.842	4.3749	-3.2944	0.0033911	0.060344	-1.8776	ARMCX2	armadillo repeat containing X-linked 2
51727	-1.9213	7.9575	-3.2936	0.0033977	0.060349	-1.8794	CMPK1	cytidine/uridine monophosphate kinase 1
64110	-1.9814	5.2654	-3.2935	0.0033983	0.060349	-1.8796	MAGEF1	MAGE family member F1
92922	-2.1689	5.8249	-3.2918	0.0034118	0.060526	-1.8832	CCDC102A	coiled-coil domain containing 102A
692247	-1.6472	6.4496	-3.2914	0.0034154	0.060528	-1.8842	LMNTD2-AS1	LMNTD2 antisense RNA 1
114991	-2.3591	4.2445	-3.2883	0.0034402	0.060905	-1.8909	ZNF618	zinc finger protein 618
9581	-2.2968	5.817	-3.2865	0.0034546	0.061084	-1.8948	PREPL	prolyl endopeptidase like
64760	-1.7292	6.4639	-3.2862	0.0034573	0.061084	-1.8955	FAM160B2	family with sequence similarity 160 member B2
51101	-1.9563	6.5999	-3.2822	0.0034902	0.06157	-1.9043	ZC2HC1A	zinc finger C2HC-type containing 1A
121053	-2.1426	7.161	-3.2819	0.0034927	0.06157	-1.9049	C12orf45	chromosome 12 open reading frame 45
84311	-1.794	8.0206	-3.2815	0.0034955	0.06157	-1.9056	MRPL45	mitochondrial ribosomal protein L45
51063	-2.4631	7.4517	-3.2795	0.0035119	0.061796	-1.91	CALHM2	calcium homeostasis modulator family member 2
58492	-1.6796	6.1288	-3.2785	0.0035204	0.061883	-1.9122	ZNF77	zinc finger protein 77
284408	-1.6073	4.6086	-3.278	0.0035244	0.061891	-1.9132	ZNF790-AS1	ZNF790 antisense RNA 1
340481	-2.5951	4.5629	-3.2758	0.0035431	0.062059	-1.9181	ZDHHC21	zinc finger DHHC-type palmitoyltransferase 21
400823	2.2432	11.229	3.2753	0.0035473	0.062059	-1.9192	FAM177B	family with sequence similarity 177 member B
7574	-1.6273	7.3284	-3.2751	0.0035489	0.062059	-1.9196	ZNF26	zinc finger protein 26
10985	-1.956	9.8337	-3.2747	0.0035518	0.062059	-1.9204	GCN1	GCN1 activator of EIF2AK4
60598	1.3899	11.643	3.2747	0.0035519	0.062059	-1.9204	KCNK15	potassium two pore domain channel subfamily K member 15
266747	2.4468	15.365	3.2733	0.0035634	0.062198	-1.9234	RGL4	ral guanine nucleotide dissociation stimulator like 4
116173	-2.454	7.105	-3.2724	0.0035713	0.062273	-1.9255	CMTM5	CKLF like MARVEL transmembrane domain containing 5
116447	-1.9014	8.2399	-3.2696	0.0035947	0.062608	-1.9315	TOP1MT	DNA topoisomerase I mitochondrial
3326	-2.0263	8.2919	-3.2687	0.0036027	0.062608	-1.9335	HSP90AB1	heat shock protein 90 alpha family class B member 1
6146	-2.5371	10.379	-3.2686	0.003603	0.062608	-1.9336	RPL22	ribosomal protein L22
9921	1.7846	13.953	3.2679	0.0036093	0.062608	-1.9352	RNF10	ring finger protein 10
83478	2.0447	8.7897	3.2678	0.0036095	0.062608	-1.9353	ARHGAP24	Rho GTPase activating protein 24
374907	2.1172	13.405	3.2675	0.0036121	0.062608	-1.936	B3GNT8	"UDP-GlcNAc:betaGal beta-1,3-N-acetylglucosaminyltransferase 8"
2647	2.1327	11.839	3.266	0.0036252	0.062771	-1.9393	BLOC1S1	biogenesis of lysosomal organelles complex 1 subunit 1
286046	-1.724	3.0125	-3.2643	0.0036393	0.062952	-1.9429	XKR6	XK related 6
8509	1.9604	10.599	3.2628	0.0036524	0.063117	-1.9462	NDST2	N-deacetylase and N-sulfotransferase 2
92558	-1.6382	4.2721	-3.2624	0.0036562	0.063119	-1.9472	BICDL1	BICD family like cargo adaptor 1
85015	-1.7258	4.0697	-3.2606	0.0036716	0.063292	-1.951	USP45	ubiquitin specific peptidase 45
203197	-1.9607	7.2259	-3.2603	0.0036735	0.063292	-1.9515	TMEM268	transmembrane protein 268
6622	-1.8194	8.1055	-3.256	0.0037113	0.06388	-1.961	SNCA	synuclein alpha
10363	-2.541	5.188	-3.2541	0.003728	0.0641	-1.9651	HMG20A	high mobility group 20A
57134	-1.6278	7.7419	-3.2537	0.0037315	0.0641	-1.966	MAN1C1	mannosidase alpha class 1C member 1
6449	1.7938	12.948	3.252	0.0037461	0.064236	-1.9696	SGTA	small glutamine rich tetratricopeptide repeat containing alpha
5445	-2.7465	5.2366	-3.2519	0.0037468	0.064236	-1.9698	PON2	paraoxonase 2
23574	3.1547	4.2983	3.2513	0.0037521	0.064264	-1.9711	PRG1	p53-responsive gene 1
2063	-2.0906	7.7611	-3.2507	0.0037572	0.064287	-1.9723	NR2F6	nuclear receptor subfamily 2 group F member 6
56935	2.0718	12.871	3.2496	0.0037673	0.064397	-1.9748	SMCO4	single-pass membrane protein with coiled-coil domains 4
2842	-2.0485	5.8644	-3.2477	0.0037844	0.064625	-1.979	GPR19	G protein-coupled receptor 19
91574	-1.6576	8.0847	-3.2468	0.0037919	0.064672	-1.9808	C12orf65	chromosome 12 open reading frame 65
955	-1.7967	8.0098	-3.2465	0.0037946	0.064672	-1.9815	ENTPD6	ectonucleoside triphosphate diphosphohydrolase 6
117283	2.2735	8.867	3.2455	0.0038038	0.064766	-1.9837	IP6K3	inositol hexakisphosphate kinase 3
10417	-3.545	9.8039	-3.2444	0.0038133	0.064829	-1.986	SPON2	spondin 2
7145	2.206	11.059	3.2442	0.003815	0.064829	-1.9864	TNS1	tensin 1
388524	-2.2011	12.374	-3.2433	0.0038232	0.064905	-1.9884	RPSAP58	ribosomal protein SA pseudogene 58
732253	1.465	11.226	3.2411	0.003843	0.065101	-1.9931	TDRG1	testis development related 1
220929	1.8368	13.487	3.2408	0.0038454	0.065101	-1.9937	ZNF438	zinc finger protein 438
399818	-1.6589	6.0726	-3.2408	0.003846	0.065101	-1.9939	EEF1AKMT2	EEF1A lysine methyltransferase 2
57001	2.066	11.159	3.2399	0.0038536	0.065165	-1.9957	SDHAF3	succinate dehydrogenase complex assembly factor 3
51207	2.5008	9.2912	3.2385	0.0038669	0.065203	-1.9989	DUSP13	dual specificity phosphatase 13
116933	1.84	10.803	3.2385	0.0038669	0.065203	-1.9989	CLRN1-AS1	CLRN1 antisense RNA 1
26190	1.7478	8.6795	3.2384	0.0038671	0.065203	-1.9989	FBXW2	F-box and WD repeat domain containing 2
8825	2.2315	13.247	3.2369	0.0038807	0.065369	-2.0022	LIN7A	"lin-7 homolog A, crumbs cell polarity complex component"
255231	-2.3103	5.4798	-3.2349	0.0038987	0.065609	-2.0064	MCOLN2	mucolipin 2
23209	-2.4215	6.481	-3.233	0.0039167	0.065848	-2.0107	MLC1	modulator of VRAC current 1
9258	-1.5378	3.8908	-3.232	0.0039256	0.065933	-2.0128	MFHAS1	malignant fibrous histiocytoma amplified sequence 1
26716	1.6038	12.407	3.2307	0.0039375	0.066069	-2.0156	OR2H1	olfactory receptor family 2 subfamily H member 1
79745	-2.8801	6.2805	-3.2298	0.0039456	0.066142	-2.0175	CLIP4	CAP-Gly domain containing linker protein family member 4
6364	2.9609	9.0111	3.2275	0.0039673	0.066405	-2.0225	CCL20	C-C motif chemokine ligand 20
10392	-1.7173	6.7382	-3.2273	0.003969	0.066405	-2.0229	NOD1	nucleotide binding oligomerization domain containing 1
64434	-1.9444	4.8833	-3.2262	0.0039798	0.066522	-2.0254	NOM1	nucleolar protein with MIF4G domain 1
340526	-1.7374	5.7793	-3.2256	0.0039845	0.066536	-2.0265	RTL5	retrotransposon Gag like 5
645104	2.0596	7.0665	3.2242	0.0039977	0.066693	-2.0296	CLRN2	clarin 2
284486	-1.7756	4.6314	-3.2223	0.0040159	0.066851	-2.0337	THEM5	thioesterase superfamily member 5
3778	3.3842	7.1413	3.2222	0.0040167	0.066851	-2.0339	KCNMA1	potassium calcium-activated channel subfamily M alpha 1
7111	-1.9806	3.094	-3.2217	0.0040213	0.066851	-2.035	TMOD1	tropomodulin 1
9022	-2.8195	7.331	-3.2211	0.0040271	0.066851	-2.0363	CLIC3	chloride intracellular channel 3
8851	1.7975	10.024	3.2206	0.0040318	0.066851	-2.0374	CDK5R1	cyclin dependent kinase 5 regulatory subunit 1
3117	-3.4099	7.2998	-3.2204	0.0040341	0.066851	-2.0379	HLA-DQA1	"major histocompatibility complex, class II, DQ alpha 1"
5987	1.6316	11.878	3.2202	0.0040356	0.066851	-2.0383	TRIM27	tripartite motif containing 27
81554	-1.8017	4.0817	-3.2199	0.0040381	0.066851	-2.0388	RCC1L	RCC1 like
83715	1.4299	7.2663	3.2193	0.0040444	0.066893	-2.0403	ESPN	espin
164153	1.5737	6.4848	3.2178	0.004058	0.066992	-2.0434	UBL4B	ubiquitin like 4B
51154	-2.6855	5.1681	-3.2178	0.0040581	0.066992	-2.0434	MRTO4	"MRT4 homolog, ribosome maturation factor"
5442	-1.9209	8.0092	-3.2165	0.0040706	0.06711	-2.0462	POLRMT	RNA polymerase mitochondrial
1407	-2.0558	6.2158	-3.2162	0.0040734	0.06711	-2.0468	CRY1	cryptochrome circadian regulator 1
64216	-1.5233	7.6091	-3.2158	0.0040769	0.06711	-2.0476	TFB2M	"transcription factor B2, mitochondrial"
56931	-1.9157	8.4273	-3.2105	0.0041279	0.067885	-2.0591	DUS3L	dihydrouridine synthase 3 like
266697	2.2288	5.5867	3.2099	0.0041339	0.06792	-2.0604	POM121L4P	"POM121 transmembrane nucleoporin like 4, pseudogene"
201292	-1.8501	7.7291	-3.2088	0.0041443	0.068026	-2.0628	TRIM65	tripartite motif containing 65
1723	-2.0945	5.7683	-3.2078	0.0041543	0.068078	-2.065	DHODH	dihydroorotate dehydrogenase (quinone)
3783	-1.9671	7.7676	-3.2077	0.0041553	0.068078	-2.0652	KCNN4	potassium calcium-activated channel subfamily N member 4
339559	-1.6394	5.1936	-3.2067	0.0041648	0.0681	-2.0673	ZFP69	ZFP69 zinc finger protein
84154	-2.0273	6.5893	-3.2064	0.0041675	0.0681	-2.0679	RPF2	ribosome production factor 2 homolog
7728	-2.0366	4.4704	-3.2057	0.0041748	0.0681	-2.0695	ZNF175	zinc finger protein 175
9717	-1.7506	3.3147	-3.205	0.0041811	0.0681	-2.0709	SEC14L5	SEC14 like lipid binding 5
84312	-1.6286	3.9131	-3.2049	0.0041828	0.0681	-2.0713	BRMS1L	BRMS1 like transcriptional repressor
51100	1.6861	13.906	3.2047	0.004184	0.0681	-2.0716	SH3GLB1	"SH3 domain containing GRB2 like, endophilin B1"
8807	1.9096	15.113	3.2047	0.0041841	0.0681	-2.0716	IL18RAP	interleukin 18 receptor accessory protein
204010	-2.2004	11.265	-3.2041	0.0041904	0.068138	-2.073	RPSAP52	ribosomal protein SA pseudogene 52
80833	-2.6109	5.6941	-3.2024	0.0042074	0.068311	-2.0767	APOL3	apolipoprotein L3
55787	-2.0278	7.3129	-3.2022	0.0042089	0.068311	-2.077	TXLNG	taxilin gamma
9097	-1.8488	4.4442	-3.2009	0.0042218	0.068457	-2.0798	USP14	ubiquitin specific peptidase 14
165324	-1.9827	4.7708	-3.1991	0.0042391	0.068617	-2.0836	UBXN2A	UBX domain protein 2A
692089	-1.9868	3.1815	-3.1991	0.0042396	0.068617	-2.0837	SNORD19	"small nucleolar RNA, C/D box 19"
100506219	1.8965	2.9317	3.1986	0.0042441	0.068626	-2.0847	100506219	NA
80746	-1.6066	5.3008	-3.1976	0.0042543	0.068697	-2.0869	TSEN2	tRNA splicing endonuclease subunit 2
79913	-1.6396	5.4768	-3.1974	0.0042564	0.068697	-2.0874	ACTR5	actin related protein 5
24145	-2.5283	5.6309	-3.1962	0.004268	0.068819	-2.0899	PANX1	pannexin 1
55170	-2.291	5.0348	-3.1956	0.0042742	0.068855	-2.0912	PRMT6	protein arginine methyltransferase 6
8992	1.7514	14.938	3.1948	0.0042824	0.068924	-2.093	ATP6V0E1	ATPase H+ transporting V0 subunit e1
7181	-2.125	5.0702	-3.1937	0.0042936	0.06904	-2.0954	NR2C1	nuclear receptor subfamily 2 group C member 1
653162	-2.1482	12.258	-3.1925	0.0043051	0.069051	-2.0978	RPSAP9	ribosomal protein SA pseudogene 9
29937	-2.2754	7.8785	-3.1925	0.0043053	0.069051	-2.0979	NENF	neudesin neurotrophic factor
57587	-2.9365	7.424	-3.1924	0.0043062	0.069051	-2.0981	CFAP97	cilia and flagella associated protein 97
11226	-2.0801	6.8763	-3.1917	0.0043135	0.069053	-2.0996	GALNT6	polypeptide N-acetylgalactosaminyltransferase 6
3148	1.9274	15.065	3.1914	0.0043163	0.069053	-2.1002	HMGB2	high mobility group box 2
415116	1.6428	15.846	3.1912	0.0043183	0.069053	-2.1007	PIM3	"Pim-3 proto-oncogene, serine/threonine kinase"
23205	-1.535	3.9998	-3.1895	0.0043353	0.069261	-2.1043	ACSBG1	acyl-CoA synthetase bubblegum family member 1
100	-2.3444	9.6608	-3.1887	0.0043435	0.069282	-2.106	ADA	adenosine deaminase
11059	-1.9003	8.9372	-3.1886	0.0043446	0.069282	-2.1063	WWP1	WW domain containing E3 ubiquitin protein ligase 1
80777	-2.2669	4.518	-3.1878	0.0043529	0.06935	-2.108	CYB5B	cytochrome b5 type B
11215	-2.0457	7.2936	-3.1867	0.0043637	0.069446	-2.1103	AKAP11	A-kinase anchoring protein 11
404201	1.7017	8.7337	3.1864	0.0043669	0.069446	-2.111	WDFY3-AS2	WDFY3 antisense RNA 2
871	-2.0653	5.3983	-3.1849	0.004382	0.069592	-2.1141	SERPINH1	serpin family H member 1
64965	-2.5773	7.5373	-3.1847	0.0043841	0.069592	-2.1146	MRPS9	mitochondrial ribosomal protein S9
22920	-2.0072	8.123	-3.1834	0.0043978	0.069688	-2.1175	KIFAP3	kinesin associated protein 3
100289455	-1.7214	3.4084	-3.1831	0.0044006	0.069688	-2.1181	100289455	NA
6749	-2.4261	9.5916	-3.183	0.0044022	0.069688	-2.1184	SSRP1	structure specific recognition protein 1
340277	-1.4865	4.5963	-3.1826	0.0044064	0.069691	-2.1193	FAM221A	family with sequence similarity 221 member A
10170	2.2409	12.574	3.1815	0.0044175	0.069723	-2.1216	DHRS9	dehydrogenase/reductase 9
57282	-1.7594	3.7017	-3.1812	0.00442	0.069723	-2.1221	SLC4A10	solute carrier family 4 member 10
3595	-1.9827	3.6513	-3.1812	0.0044204	0.069723	-2.1222	IL12RB2	interleukin 12 receptor subunit beta 2
10098	-2.2016	5.8413	-3.1807	0.0044258	0.069731	-2.1233	TSPAN5	tetraspanin 5
8165	-2.0185	7.5301	-3.1804	0.0044291	0.069731	-2.124	AKAP1	A-kinase anchoring protein 1
286827	-2.0323	6.226	-3.1793	0.0044402	0.069844	-2.1263	TRIM59	tripartite motif containing 59
51109	-1.74	9.1067	-3.1788	0.0044457	0.069867	-2.1275	RDH11	retinol dehydrogenase 11
4354	1.5328	13.818	3.1776	0.0044576	0.06999	-2.1299	MPP1	membrane palmitoylated protein 1
7465	-2.515	4.834	-3.1762	0.0044726	0.070162	-2.133	WEE1	WEE1 G2 checkpoint kinase
1602	2.2113	10.316	3.175	0.0044851	0.070247	-2.1356	DACH1	dachshund family transcription factor 1
440503	2.7103	12.403	3.1749	0.0044861	0.070247	-2.1358	PLIN5	perilipin 5
528	1.6989	12.01	3.1716	0.0045203	0.070532	-2.1428	ATP6V1C1	ATPase H+ transporting V1 subunit C1
286148	-1.7377	4.6969	-3.1716	0.0045207	0.070532	-2.1428	DPY19L4	dpy-19 like 4
126695	-1.3625	4.5143	-3.1713	0.0045233	0.070532	-2.1434	KDF1	keratinocyte differentiation factor 1
90871	-1.9218	3.2644	-3.1712	0.0045244	0.070532	-2.1436	DMAC1	distal membrane arm assembly complex 1
6117	-1.9002	9.0905	-3.1712	0.0045246	0.070532	-2.1436	RPA1	replication protein A1
80224	-2.3859	5.7273	-3.1698	0.0045393	0.070609	-2.1466	NUBPL	nucleotide binding protein like
3843	-2.1317	5.6579	-3.1694	0.0045436	0.070609	-2.1475	IPO5	importin 5
440387	1.6345	11.659	3.1694	0.0045438	0.070609	-2.1475	CTRB2	chymotrypsinogen B2
151056	2.2502	10.36	3.1692	0.0045458	0.070609	-2.148	PLB1	phospholipase B1
9706	-1.6735	5.9783	-3.1685	0.0045528	0.070654	-2.1494	ULK2	unc-51 like autophagy activating kinase 2
83695	-1.7434	7.6806	-3.1682	0.0045569	0.070654	-2.1502	RHNO1	RAD9-HUS1-RAD1 interacting nuclear orphan 1
10406	2.4916	10.064	3.167	0.0045691	0.07078	-2.1527	WFDC2	WAP four-disulfide core domain 2
83853	2.1972	12.886	3.1654	0.0045867	0.070961	-2.1562	ROPN1L	rhophilin associated tail protein 1 like
51700	2.0593	8.1516	3.1651	0.004589	0.070961	-2.1567	CYB5R2	cytochrome b5 reductase 2
59285	-3.0793	6.8521	-3.1635	0.004607	0.071177	-2.1603	CACNG6	calcium voltage-gated channel auxiliary subunit gamma 6
114879	-1.9366	7.231	-3.163	0.0046121	0.071193	-2.1613	OSBPL5	oxysterol binding protein like 5
11341	2.812	6.758	3.1612	0.0046318	0.071432	-2.1652	SCRG1	stimulator of chondrogenesis 1
155060	-1.7719	5.9718	-3.1599	0.0046454	0.071435	-2.1679	LOC155060	AI894139 pseudogene
255488	2.0353	12.706	3.1598	0.0046466	0.071435	-2.1681	RNF144B	ring finger protein 144B
7556	-1.4527	5.6736	-3.1597	0.0046478	0.071435	-2.1684	ZNF10	zinc finger protein 10
22902	-1.9414	3.155	-3.1589	0.0046561	0.071435	-2.17	RUFY3	RUN and FYVE domain containing 3
129607	-2.6976	8.385	-3.1583	0.0046626	0.071435	-2.1713	CMPK2	cytidine/uridine monophosphate kinase 2
130916	-1.5038	7.0747	-3.1582	0.0046637	0.071435	-2.1715	MTERF4	mitochondrial transcription termination factor 4
777	2.5474	9.0094	3.1581	0.0046648	0.071435	-2.1717	CACNA1E	calcium voltage-gated channel subunit alpha1 E
79066	-1.8209	7.7641	-3.1581	0.0046649	0.071435	-2.1718	METTL16	methyltransferase like 16
121642	-1.8242	7.2396	-3.1567	0.0046805	0.071558	-2.1748	ALKBH2	"alkB homolog 2, alpha-ketoglutarate dependent dioxygenase"
6556	2.014	12.434	3.156	0.0046873	0.071558	-2.1762	SLC11A1	solute carrier family 11 member 1
145853	-2.1905	7.7493	-3.1559	0.0046888	0.071558	-2.1765	C15orf61	chromosome 15 open reading frame 61
1406	2.0376	7.4869	3.1558	0.0046894	0.071558	-2.1766	CRX	cone-rod homeobox
7748	-1.6431	7.8394	-3.1536	0.0047141	0.071871	-2.1814	ZNF195	zinc finger protein 195
116225	-1.6962	4.5223	-3.1515	0.0047373	0.072103	-2.1859	ZMYND19	zinc finger MYND-type containing 19
147694	-2.2797	3.995	-3.1512	0.0047401	0.072103	-2.1865	ZNF548	zinc finger protein 548
84129	-2.277	5.1713	-3.1511	0.0047417	0.072103	-2.1868	ACAD11	acyl-CoA dehydrogenase family member 11
11076	-3.0091	4.7607	-3.1489	0.0047654	0.072399	-2.1914	TPPP	tubulin polymerization promoting protein
6122	-1.8304	13.98	-3.1483	0.0047723	0.07244	-2.1927	RPL3	ribosomal protein L3
2210	2.0053	14.154	3.1465	0.0047921	0.072636	-2.1965	FCGR1B	Fc fragment of IgG receptor Ib
339983	1.555	11.977	3.1464	0.0047936	0.072636	-2.1968	NAT8L	N-acetyltransferase 8 like
360	-2.1733	6.2665	-3.145	0.0048098	0.072818	-2.1999	AQP3	aquaporin 3 (Gill blood group)
145864	-2.031	9.7546	-3.1436	0.004825	0.072985	-2.2028	HAPLN3	hyaluronan and proteoglycan link protein 3
79921	-1.6059	8.0647	-3.143	0.004832	0.073027	-2.2041	TCEAL4	transcription elongation factor A like 4
10079	2.4561	9.2869	3.1416	0.0048474	0.073196	-2.2071	ATP9A	ATPase phospholipid transporting 9A (putative)
84306	-2.4517	6.2819	-3.1403	0.0048616	0.073346	-2.2097	PDCD2L	programmed cell death 2 like
10941	1.5701	3.2377	3.1394	0.0048726	0.073449	-2.2118	UGT2A1	UDP glucuronosyltransferase family 2 member A1 complex locus
259293	-1.716	6.1042	-3.1378	0.0048903	0.073652	-2.2152	TAS2R30	taste 2 receptor member 30
84674	1.8532	11.565	3.1354	0.0049175	0.073997	-2.2203	CARD6	caspase recruitment domain family member 6
8682	-1.8253	4.7012	-3.1335	0.0049395	0.074264	-2.2244	PEA15	proliferation and apoptosis adaptor protein 15
133522	-2.0903	5.0013	-3.1325	0.0049506	0.074274	-2.2265	PPARGC1B	PPARG coactivator 1 beta
6606	-1.6309	9.82	-3.1323	0.004953	0.074274	-2.2269	SMN1	"survival of motor neuron 1, telomeric"
219731	1.6491	5.7491	3.1321	0.0049556	0.074274	-2.2274	PROSER2-AS1	PROSER2 antisense RNA 1
29993	-2.1679	6.783	-3.1319	0.0049579	0.074274	-2.2278	PACSIN1	protein kinase C and casein kinase substrate in neurons 1
6124	-1.9553	12.988	-3.1316	0.0049616	0.074274	-2.2285	RPL4	ribosomal protein L4
56947	1.5888	13.238	3.1295	0.0049863	0.074501	-2.233	MFF	mitochondrial fission factor
54496	-2.0791	7.4678	-3.1293	0.0049878	0.074501	-2.2333	PRMT7	protein arginine methyltransferase 7
3298	-1.8476	7.9224	-3.1292	0.0049896	0.074501	-2.2337	HSF2	heat shock transcription factor 2
387751	-2.6524	6.1602	-3.1286	0.0049966	0.074541	-2.2349	GVINP1	"GTPase, very large interferon inducible pseudogene 1"
92370	1.4445	9.1672	3.1276	0.0050072	0.074635	-2.2369	PXYLP1	2-phosphoxylose phosphatase 1
60488	-2.2312	7.9874	-3.1263	0.0050225	0.074738	-2.2397	MRPS35	mitochondrial ribosomal protein S35
389125	2.135	8.8423	3.1263	0.0050228	0.074738	-2.2397	MUSTN1	"musculoskeletal, embryonic nuclear protein 1"
57542	-2.3736	4.9175	-3.1246	0.0050431	0.074789	-2.2435	KLHL42	kelch like family member 42
9093	-1.9012	7.9712	-3.1245	0.0050442	0.074789	-2.2437	DNAJA3	DnaJ heat shock protein family (Hsp40) member A3
29952	-1.5404	8.6628	-3.1243	0.0050469	0.074789	-2.2442	DPP7	dipeptidyl peptidase 7
3033	-2.0441	7.9546	-3.1241	0.0050489	0.074789	-2.2445	HADH	hydroxyacyl-CoA dehydrogenase
353	-2.1375	10.812	-3.1239	0.0050507	0.074789	-2.2449	APRT	adenine phosphoribosyltransferase
57109	-2.479	7.8772	-3.1228	0.0050644	0.074789	-2.2473	REXO4	"REX4 homolog, 3'-5' exonuclease"
3101	1.9969	10.974	3.1222	0.0050704	0.074789	-2.2484	HK3	hexokinase 3
81539	-2.1925	9.7798	-3.1221	0.0050719	0.074789	-2.2487	SLC38A1	solute carrier family 38 member 1
3964	1.5431	9.8212	3.1219	0.005075	0.074789	-2.2493	LGALS8	galectin 8
26123	-2.0291	6.9963	-3.1218	0.0050755	0.074789	-2.2493	TCTN3	tectonic family member 3
23630	1.733	9.2593	3.1215	0.0050795	0.074789	-2.2501	KCNE5	potassium voltage-gated channel subfamily E regulatory subunit 5
492311	-2.5732	4.9707	-3.1214	0.0050807	0.074789	-2.2503	IGIP	IgA inducing protein
7571	-2.273	5.3409	-3.1209	0.0050868	0.074789	-2.2514	ZNF23	zinc finger protein 23
84067	1.8926	13.411	3.1204	0.0050921	0.074789	-2.2523	FAM160A2	family with sequence similarity 160 member A2
100874052	-1.5482	4.1742	-3.1202	0.0050942	0.074789	-2.2527	LINC00534	long intergenic non-protein coding RNA 534
2729	-1.9625	6.7307	-3.1202	0.0050951	0.074789	-2.2529	GCLC	glutamate-cysteine ligase catalytic subunit
231	-2.4803	7.2262	-3.1197	0.0051004	0.074802	-2.2538	AKR1B1	aldo-keto reductase family 1 member B
1234	-2.1837	8.1872	-3.1184	0.0051157	0.074924	-2.2566	CCR5	C-C motif chemokine receptor 5 (gene/pseudogene)
55217	1.5207	9.0285	3.1183	0.0051173	0.074924	-2.2569	TMLHE	"trimethyllysine hydroxylase, epsilon"
283663	-2.4909	9.5884	-3.1177	0.0051248	0.074971	-2.2582	LINC00926	long intergenic non-protein coding RNA 926
94234	2.6824	6.6417	3.1139	0.0051694	0.07556	-2.2662	FOXQ1	forkhead box Q1
1808	-2.3713	6.2004	-3.1131	0.0051787	0.075632	-2.2679	DPYSL2	dihydropyrimidinase like 2
54757	3.0602	7.5693	3.1113	0.0052007	0.07589	-2.2718	FAM20A	FAM20A golgi associated secretory pathway pseudokinase
57171	-1.6516	7.052	-3.1094	0.0052241	0.076165	-2.2759	DOLPP1	dolichyldiphosphatase 1
89927	-1.9264	4.8358	-3.109	0.0052284	0.076165	-2.2766	BMERB1	bMERB domain containing 1
54929	-1.6365	8.6309	-3.1076	0.0052456	0.076352	-2.2796	TMEM161A	transmembrane protein 161A
79033	-1.8623	5.0352	-3.1064	0.0052598	0.076494	-2.2821	ERI3	ERI1 exoribonuclease family member 3
8819	2.4254	11.203	3.1034	0.0052972	0.076932	-2.2886	SAP30	Sin3A associated protein 30
284630	-2.0862	4.0994	-3.1033	0.0052988	0.076932	-2.2889	284630	NA
7097	1.7364	15.82	3.1028	0.0053047	0.076954	-2.2899	TLR2	toll like receptor 2
348840	1.4679	8.3747	3.1024	0.0053098	0.076963	-2.2908	ANKRD18DP	"ankyrin repeat domain 18D, pseudogene"
388650	-2.0779	4.9003	-3.1019	0.005316	0.076989	-2.2919	DIPK1A	divergent protein kinase domain 1A
387837	1.5842	9.1045	3.1009	0.0053283	0.077102	-2.294	CLEC12B	C-type lectin domain family 12 member B
158931	-1.7749	7.4894	-3.0992	0.0053487	0.077333	-2.2975	TCEAL6	transcription elongation factor A like 6
440193	-1.6652	8.3481	-3.0988	0.0053533	0.077336	-2.2983	CCDC88C	coiled-coil domain containing 88C
23279	-1.9309	8.2271	-3.0967	0.0053796	0.077486	-2.3028	NUP160	nucleoporin 160
388591	-1.5382	4.5465	-3.0967	0.0053801	0.077486	-2.3029	RNF207	ring finger protein 207
400322	-2.5493	6.9481	-3.0966	0.0053816	0.077486	-2.3032	HERC2P2	hect domain and RLD 2 pseudogene 2
375790	-1.5674	7.1672	-3.0966	0.0053816	0.077486	-2.3032	AGRN	agrin
326342	-2.0829	4.9788	-3.0951	0.0054002	0.077689	-2.3063	ADGRE4P	"adhesion G protein-coupled receptor E4, pseudogene"
100507209	-1.9645	4.4123	-3.0947	0.0054052	0.077697	-2.3072	100507209	NA
11340	-1.8582	9.1171	-3.094	0.005414	0.077706	-2.3087	EXOSC8	exosome component 8
240	1.7214	16.144	3.0937	0.005417	0.077706	-2.3092	ALOX5	arachidonate 5-lipoxygenase
148789	-1.8955	5.6375	-3.0936	0.0054193	0.077706	-2.3096	B3GALNT2	"beta-1,3-N-acetylgalactosaminyltransferase 2"
259291	-2.023	4.0417	-3.0921	0.0054372	0.077819	-2.3126	259291	NA
342908	-2.0142	3.583	-3.0919	0.0054398	0.077819	-2.313	ZNF404	zinc finger protein 404
6094	1.9567	9.3064	3.0919	0.0054406	0.077819	-2.3132	ROM1	retinal outer segment membrane protein 1
84939	-1.7634	7.0648	-3.0913	0.0054482	0.077864	-2.3145	PWWP3A	"PWWP domain containing 3A, DNA repair factor"
93594	-2.0758	5.3173	-3.0895	0.0054707	0.077998	-2.3182	TBC1D31	TBC1 domain family member 31
23129	-2.1611	7.1142	-3.0892	0.0054747	0.077998	-2.3189	PLXND1	plexin D1
5836	1.8976	15.685	3.089	0.0054764	0.077998	-2.3192	PYGL	glycogen phosphorylase L
644186	2.2899	8.1009	3.0889	0.0054776	0.077998	-2.3194	SYCE3	synaptonemal complex central element protein 3
6282	1.7213	16.016	3.0887	0.0054801	0.077998	-2.3198	S100A11	S100 calcium binding protein A11
84678	-1.5255	5.1134	-3.088	0.0054895	0.078063	-2.3214	KDM2B	lysine demethylase 2B
54491	1.5478	9.7409	3.0875	0.0054959	0.078063	-2.3225	OTULINL	OTU deubiquitinase with linear linkage specificity like
80184	-1.6666	6.2169	-3.0873	0.0054982	0.078063	-2.3228	CEP290	centrosomal protein 290
55750	-2.4879	5.2874	-3.0867	0.0055057	0.078106	-2.3241	AGK	acylglycerol kinase
55299	-1.8898	6.8562	-3.0861	0.0055137	0.078155	-2.3254	BRIX1	biogenesis of ribosomes BRX1
6583	2.0531	12.725	3.0857	0.0055182	0.078156	-2.3262	SLC22A4	solute carrier family 22 member 4
1912	1.8649	15.262	3.085	0.0055275	0.078207	-2.3277	PHC2	polyhomeotic homolog 2
54855	-1.8139	10.091	-3.0845	0.005534	0.078207	-2.3288	TENT5C	terminal nucleotidyltransferase 5C
27350	-2.3687	7.7597	-3.0844	0.0055354	0.078207	-2.329	APOBEC3C	apolipoprotein B mRNA editing enzyme catalytic subunit 3C
114822	-1.4122	7.2497	-3.0832	0.0055513	0.078321	-2.3317	RHPN1	rhophilin Rho GTPase binding protein 1
10884	-1.7081	6.6298	-3.0831	0.0055525	0.078321	-2.3319	MRPS30	mitochondrial ribosomal protein S30
4771	-2.1881	8.2799	-3.0815	0.005573	0.078547	-2.3352	NF2	neurofibromin 2
677836	-1.713	5.0545	-3.0792	0.005602	0.078843	-2.34	SNORA58	"small nucleolar RNA, H/ACA box 58"
84916	-1.8073	6.7435	-3.0792	0.005603	0.078843	-2.3402	UTP4	UTP4 small subunit processome component
9652	-1.9999	8.3353	-3.0787	0.005609	0.078862	-2.3412	TTC37	tetratricopeptide repeat domain 37
4440	1.5594	8.1022	3.0777	0.005622	0.078982	-2.3433	MSI1	musashi RNA binding protein 1
27292	-1.72	7.953	-3.0768	0.0056339	0.079021	-2.3452	DIMT1	DIMT1 rRNA methyltransferase and ribosome maturation factor
926	-2.7677	7.7784	-3.0768	0.0056339	0.079021	-2.3452	CD8B	CD8b molecule
5866	2.3214	5.8918	3.0757	0.0056478	0.079151	-2.3475	RAB3IL1	RAB3A interacting protein like 1
273	2.1346	7.7379	3.075	0.0056577	0.079226	-2.3491	AMPH	amphiphysin
388387	1.4209	7.564	3.0735	0.0056763	0.07936	-2.3521	LINC00671	long intergenic non-protein coding RNA 671
55920	-2.1296	8.4654	-3.0735	0.0056764	0.07936	-2.3521	RCC2	regulator of chromosome condensation 2
5151	-1.6712	6.693	-3.073	0.0056828	0.079385	-2.3532	PDE8A	phosphodiesterase 8A
259197	-1.9031	8.1753	-3.0726	0.0056885	0.079402	-2.3541	NCR3	natural cytotoxicity triggering receptor 3
4736	-2.2261	14.084	-3.0711	0.0057078	0.07959	-2.3572	RPL10A	ribosomal protein L10a
340547	-1.825	5.4905	-3.0707	0.0057136	0.07959	-2.3581	VSIG1	V-set and immunoglobulin domain containing 1
60526	-1.9848	5.0038	-3.0705	0.0057158	0.07959	-2.3585	LDAH	lipid droplet associated hydrolase
100188949	-1.9691	6.6858	-3.0694	0.0057308	0.079675	-2.3609	LINC00426	long intergenic non-protein coding RNA 426
91523	-1.7552	8.9701	-3.0694	0.0057311	0.079675	-2.3609	PCED1B	PC-esterase domain containing 1B
3902	-3.1618	7.3315	-3.0689	0.0057373	0.079697	-2.3619	LAG3	lymphocyte activating 3
6705	2.1525	11.442	3.0684	0.0057448	0.079738	-2.3631	SPRR2F	small proline rich protein 2F
3434	-3.0945	11.72	-3.0674	0.005758	0.079857	-2.3652	IFIT1	interferon induced protein with tetratricopeptide repeats 1
100303755	-2.1104	7.7233	-3.0656	0.0057818	0.08009	-2.369	PET117	PET117 cytochrome c oxidase chaperone
23176	-1.5249	4.4773	-3.0652	0.0057864	0.08009	-2.3697	SEPTIN8	septin 8
84319	-2.5692	6.9822	-3.0651	0.0057886	0.08009	-2.3701	CMSS1	cms1 ribosomal small subunit homolog
114826	-2.3339	6.4929	-3.0641	0.0058017	0.080207	-2.3722	SMYD4	SET and MYND domain containing 4
57209	-1.7677	3.3442	-3.0626	0.0058212	0.080377	-2.3752	ZNF248	zinc finger protein 248
286436	-1.439	4.6134	-3.0625	0.0058232	0.080377	-2.3756	H2BW2	H2B.W histone 2
170463	-2.484	9.6821	-3.0621	0.0058291	0.080393	-2.3765	SSBP4	single stranded DNA binding protein 4
169714	-1.5856	6.7222	-3.0607	0.0058475	0.080583	-2.3794	QSOX2	quiescin sulfhydryl oxidase 2
8131	-2.3049	7.3744	-3.0603	0.0058522	0.080584	-2.3801	NPRL3	"NPR3 like, GATOR1 complex subunit"
8504	-1.8779	5.1219	-3.0583	0.00588	0.080789	-2.3845	PEX3	peroxisomal biogenesis factor 3
56919	-1.9908	5.4711	-3.0582	0.0058819	0.080789	-2.3847	DHX33	DEAH-box helicase 33
285489	-2.3146	4.1234	-3.0581	0.005882	0.080789	-2.3848	DOK7	docking protein 7
28966	-1.7827	6.4451	-3.0579	0.0058857	0.080789	-2.3853	SNX24	sorting nexin 24
130399	-1.9264	4.6056	-3.0564	0.0059054	0.080995	-2.3884	ACVR1C	activin A receptor type 1C
6019	-2.5025	3.6163	-3.0558	0.0059134	0.081041	-2.3896	RLN2	relaxin 2
91543	-3.9275	8.9815	-3.0552	0.0059216	0.081089	-2.3909	RSAD2	radical S-adenosyl methionine domain containing 2
55900	-1.7588	5.7644	-3.0546	0.00593	0.08114	-2.3922	ZNF302	zinc finger protein 302
150005	2.166	7.6583	3.0541	0.0059373	0.081176	-2.3934	150005	NA
22800	-2.4651	6.1322	-3.0537	0.005942	0.081176	-2.3941	RRAS2	RAS related 2
79707	-1.6225	6.3803	-3.0516	0.0059717	0.081432	-2.3986	NOL9	nucleolar protein 9
1031	2.1697	9.763	3.0515	0.0059735	0.081432	-2.3989	CDKN2C	cyclin dependent kinase inhibitor 2C
10352	-1.9588	4.8733	-3.0514	0.0059748	0.081432	-2.3991	WARS2	"tryptophanyl tRNA synthetase 2, mitochondrial"
91942	-1.8151	6.8864	-3.0507	0.0059833	0.081481	-2.4004	NDUFAF2	NADH:ubiquinone oxidoreductase complex assembly factor 2
9014	-2.5037	6.0737	-3.0504	0.0059878	0.081481	-2.4011	TAF1B	"TATA-box binding protein associated factor, RNA polymerase I subunit B"
399832	-1.8062	5.1918	-3.0497	0.0059977	0.081552	-2.4026	399832	NA
2597	1.8224	15.251	3.0492	0.0060052	0.08159	-2.4038	GAPDH	glyceraldehyde-3-phosphate dehydrogenase
283377	-1.7937	5.5658	-3.0487	0.0060121	0.081619	-2.4048	SPRYD4	SPRY domain containing 4
124454	-1.7919	3.5022	-3.048	0.0060219	0.081689	-2.4063	EARS2	"glutamyl-tRNA synthetase 2, mitochondrial"
978	2.099	13.6	3.0471	0.006034	0.081788	-2.4082	CDA	cytidine deaminase
23607	-2.2809	4.5765	-3.0459	0.0060504	0.081889	-2.4107	CD2AP	CD2 associated protein
57711	-2.0798	6.228	-3.0454	0.0060577	0.081889	-2.4118	ZNF529	zinc finger protein 529
2815	-2.3611	9.2974	-3.0452	0.0060605	0.081889	-2.4122	GP9	glycoprotein IX platelet
400360	-1.5646	4.2306	-3.0449	0.0060643	0.081889	-2.4127	C15orf54	chromosome 15 putative open reading frame 54
9020	-1.5856	9.7724	-3.0449	0.006065	0.081889	-2.4129	MAP3K14	mitogen-activated protein kinase kinase kinase 14
203054	-1.6459	6.5222	-3.0442	0.0060742	0.081944	-2.4143	ADCK5	aarF domain containing kinase 5
51191	-2.7167	9.2282	-3.0436	0.0060835	0.081944	-2.4156	HERC5	HECT and RLD domain containing E3 ubiquitin protein ligase 5
9858	-1.8123	4.3372	-3.0433	0.0060869	0.081944	-2.4162	PPP1R26	protein phosphatase 1 regulatory subunit 26
27074	-2.6923	6.9346	-3.0428	0.0060934	0.081944	-2.4171	LAMP3	lysosomal associated membrane protein 3
23059	-1.5231	6.1983	-3.0428	0.0060939	0.081944	-2.4172	CLUAP1	clusterin associated protein 1
9603	-2.0432	5.7412	-3.0426	0.0060974	0.081944	-2.4177	NFE2L3	"nuclear factor, erythroid 2 like 3"
10608	-1.7127	8.1394	-3.0415	0.0061129	0.082088	-2.4201	MXD4	MAX dimerization protein 4
1052	1.7595	14.552	3.0411	0.0061187	0.082103	-2.4209	CEBPD	CCAAT enhancer binding protein delta
116844	2.5432	14.722	3.0399	0.0061355	0.082265	-2.4234	LRG1	leucine rich alpha-2-glycoprotein 1
79844	-1.8409	5.868	-3.0392	0.0061453	0.082286	-2.4249	ZDHHC11	zinc finger DHHC-type containing 11
662	-1.5956	6.3183	-3.0388	0.0061504	0.082286	-2.4257	BNIP1	BCL2 interacting protein 1
8459	1.5576	13.371	3.0388	0.0061513	0.082286	-2.4258	TPST2	tyrosylprotein sulfotransferase 2
22916	-2.4608	6.726	-3.0359	0.0061918	0.082764	-2.4318	NCBP2	nuclear cap binding protein subunit 2
9684	-1.7117	8.4404	-3.0347	0.0062084	0.082922	-2.4343	LRRC14	leucine rich repeat containing 14
55640	2.6462	6.6802	3.0341	0.0062179	0.082981	-2.4357	FLVCR2	FLVCR heme transporter 2
84282	1.5351	13.064	3.0338	0.0062224	0.082981	-2.4363	RNF135	ring finger protein 135
26952	1.7707	9.599	3.0324	0.0062423	0.083183	-2.4393	SMR3A	submaxillary gland androgen regulated protein 3A
55512	-3.2735	8.8013	-3.0319	0.0062485	0.083202	-2.4402	SMPD3	sphingomyelin phosphodiesterase 3
79791	-1.7375	5.9412	-3.0314	0.006256	0.083238	-2.4413	FBXO31	F-box protein 31
54876	-1.5657	8.8382	-3.0307	0.0062671	0.083321	-2.4429	DCAF16	DDB1 and CUL4 associated factor 16
8702	1.4866	9.0793	3.0282	0.0063033	0.083511	-2.4482	B4GALT4	"beta-1,4-galactosyltransferase 4"
9937	-2.3219	5.8966	-3.028	0.0063053	0.083511	-2.4485	DCLRE1A	DNA cross-link repair 1A
2787	1.8422	14.081	3.028	0.0063059	0.083511	-2.4486	GNG5	G protein subunit gamma 5
10450	-1.5965	6.2763	-3.0279	0.0063076	0.083511	-2.4488	PPIE	peptidylprolyl isomerase E
22796	-1.8196	7.643	-3.0277	0.00631	0.083511	-2.4492	COG2	component of oligomeric golgi complex 2
66035	-1.5541	3.761	-3.0277	0.0063102	0.083511	-2.4492	SLC2A11	solute carrier family 2 member 11
6013	-1.4317	3.5623	-3.0261	0.006333	0.083749	-2.4525	RLN1	relaxin 1
137872	-1.6915	6.1851	-3.0248	0.0063518	0.083933	-2.4552	ADHFE1	alcohol dehydrogenase iron containing 1
112942	-1.533	9.2422	-3.0226	0.0063842	0.084297	-2.4599	CFAP36	cilia and flagella associated protein 36
55062	1.7393	12.843	3.0218	0.0063969	0.0844	-2.4617	WIPI1	"WD repeat domain, phosphoinositide interacting 1"
6507	2.8823	6.3514	3.0212	0.006405	0.084438	-2.4628	SLC1A3	solute carrier family 1 member 3
79039	-1.5196	9.4163	-3.0204	0.0064172	0.084438	-2.4646	DDX54	DEAD-box helicase 54
55786	-1.5921	4.2256	-3.0203	0.0064178	0.084438	-2.4647	ZNF415	zinc finger protein 415
10865	1.5261	12.794	3.0203	0.0064192	0.084438	-2.4649	ARID5A	AT-rich interaction domain 5A
10447	-2.0659	4.9869	-3.0195	0.0064297	0.084511	-2.4664	FAM3C	FAM3 metabolism regulating signaling molecule C
27333	-1.9351	5.2668	-3.018	0.0064532	0.084698	-2.4697	GOLIM4	golgi integral membrane protein 4
8120	2.6396	6.3952	3.0177	0.0064573	0.084698	-2.4703	AP3B2	adaptor related protein complex 3 subunit beta 2
100506023	1.5027	9.451	3.0176	0.0064586	0.084698	-2.4705	LOC100506023	uncharacterized LOC100506023
27042	-1.7679	4.9219	-3.016	0.0064822	0.0849	-2.4738	UTP25	UTP25 small subunit processor component
9816	-1.9552	5.4443	-3.0159	0.0064837	0.0849	-2.474	URB2	URB2 ribosome biogenesis homolog
59084	-1.6557	3.8569	-3.015	0.0064968	0.084977	-2.4759	ENPP5	ectonucleotide pyrophosphatase/phosphodiesterase family member 5
202781	-1.3971	4.7801	-3.0145	0.0065041	0.084977	-2.4769	PAXIP1-AS1	PAXIP1 antisense RNA 1 (head to head)
65072	1.6452	6.2386	3.0145	0.0065043	0.084977	-2.4769	CFLAR-AS1	CFLAR antisense RNA 1
6125	-1.7803	13.402	-3.0121	0.0065405	0.085385	-2.482	RPL5	ribosomal protein L5
10637	-1.8774	4.6157	-3.0115	0.0065504	0.085441	-2.4834	LEFTY1	left-right determination factor 1
79589	2.8197	5.5074	3.0111	0.0065565	0.085441	-2.4842	RNF128	ring finger protein 128
4205	1.9389	12.239	3.0109	0.0065595	0.085441	-2.4847	MEF2A	myocyte enhancer factor 2A
30	1.3129	14.156	3.0104	0.006566	0.085462	-2.4856	ACAA1	acetyl-CoA acyltransferase 1
79085	-1.9333	5.7473	-3.0091	0.0065859	0.085657	-2.4884	SLC25A23	solute carrier family 25 member 23
1030	1.3596	3.7805	3.0084	0.006596	0.085723	-2.4897	CDKN2B	cyclin dependent kinase inhibitor 2B
23552	-1.379	5.0524	-3.0052	0.0066449	0.086243	-2.4965	CDK20	cyclin dependent kinase 20
965	1.5814	11.992	3.0052	0.006646	0.086243	-2.4967	CD58	CD58 molecule
115399	-1.864	5.9181	-3.0032	0.0066766	0.086504	-2.5009	LRRC56	leucine rich repeat containing 56
23264	-2.1384	6.2385	-3.003	0.0066792	0.086504	-2.5012	ZC3H7B	zinc finger CCCH-type containing 7B
10239	1.7298	11.56	3.0029	0.006681	0.086504	-2.5015	AP3S2	adaptor related protein complex 3 subunit sigma 2
9294	-1.7628	6.5754	-3.0013	0.0067052	0.086753	-2.5048	S1PR2	sphingosine-1-phosphate receptor 2
26152	-2.0609	5.3577	-3.0008	0.0067132	0.086791	-2.5059	ZNF337	zinc finger protein 337
10627	1.5457	16.773	2.9997	0.0067297	0.08694	-2.5081	MYL12A	myosin light chain 12A
64782	-1.733	5.6523	-2.9986	0.0067473	0.087074	-2.5105	AEN	apoptosis enhancing nuclease
3127	-2.5443	9.936	-2.9984	0.0067501	0.087074	-2.5109	HLA-DRB5	"major histocompatibility complex, class II, DR beta 5"
64755	-1.7597	6.6887	-2.9965	0.0067799	0.087393	-2.5149	C16orf58	chromosome 16 open reading frame 58
9194	-1.7454	4.8342	-2.9956	0.0067933	0.087486	-2.5167	SLC16A7	solute carrier family 16 member 7
79728	-1.8014	3.9642	-2.9951	0.0068009	0.087486	-2.5177	PALB2	partner and localizer of BRCA2
8993	2.4092	12.829	2.9951	0.0068022	0.087486	-2.5179	PGLYRP1	peptidoglycan recognition protein 1
6541	-2.7132	5.1784	-2.9944	0.0068126	0.087554	-2.5193	SLC7A1	solute carrier family 7 member 1
441951	1.6325	15.698	2.9936	0.0068255	0.087656	-2.5211	ZFAS1	ZNFX1 antisense RNA 1
51295	-1.6668	8.2455	-2.9913	0.0068608	0.087983	-2.5258	ECSIT	ECSIT signaling integrator
8772	1.5689	12.886	2.9913	0.0068612	0.087983	-2.5258	FADD	Fas associated via death domain
3904	-3.4977	6.4265	-2.9906	0.0068723	0.08806	-2.5273	LAIR2	leukocyte associated immunoglobulin like receptor 2
51367	-2.4337	8.8547	-2.9898	0.0068843	0.088149	-2.5289	POP5	"POP5 homolog, ribonuclease P/MRP subunit"
677845	2.1919	5.265	2.9871	0.0069272	0.088571	-2.5346	SNORA79	"small nucleolar RNA, H/ACA box 79"
100874255	-1.4535	3.3029	-2.987	0.0069296	0.088571	-2.5349	RNASEH2B-AS1	RNASEH2B antisense RNA 1
4684	-2.2959	4.4191	-2.9868	0.0069325	0.088571	-2.5353	NCAM1	neural cell adhesion molecule 1
55617	-1.5754	6.2751	-2.9839	0.006979	0.089098	-2.5414	TASP1	taspase 1
51177	-1.7935	13.434	-2.9833	0.0069887	0.089157	-2.5427	PLEKHO1	pleckstrin homology domain containing O1
80304	-2.095	3.7937	-2.9776	0.00708	0.090256	-2.5545	WDCP	WD repeat and coiled coil containing
2039	-2.0789	8.6479	-2.9757	0.0071109	0.090583	-2.5585	DMTN	dematin actin binding protein
51314	2.0254	11.867	2.9752	0.0071201	0.090634	-2.5597	NME8	NME/NM23 family member 8
55795	-1.811	7.9259	-2.9743	0.0071346	0.090751	-2.5616	PCID2	PCI domain containing 2
65005	-2.0513	9.6258	-2.9739	0.0071408	0.090764	-2.5624	MRPL9	mitochondrial ribosomal protein L9
440952	1.2955	7.6422	2.9726	0.0071619	0.090925	-2.5651	EIF1B-AS1	EIF1B antisense RNA 1
119369	-2.2891	3.2445	-2.9725	0.0071639	0.090925	-2.5653	NUDT9P1	nudix hydrolase 9 pseudogene 1
4124	-1.7555	7.7178	-2.9699	0.0072067	0.091353	-2.5708	MAN2A1	mannosidase alpha class 2A member 1
144983	-1.4427	10.668	-2.9697	0.0072102	0.091353	-2.5712	HNRNPA1L2	heterogeneous nuclear ribonucleoprotein A1 like 2
23119	-1.6961	8.1121	-2.9695	0.0072135	0.091353	-2.5716	HIC2	HIC ZBTB transcriptional repressor 2
57696	-1.495	7.3003	-2.9681	0.0072361	0.091517	-2.5745	DDX55	DEAD-box helicase 55
222236	-1.612	5.6062	-2.9681	0.0072369	0.091517	-2.5746	NAPEPLD	N-acyl phosphatidylethanolamine phospholipase D
79648	-2.0014	5.2673	-2.967	0.0072539	0.091597	-2.5767	MCPH1	microcephalin 1
64776	-1.5709	6.0657	-2.9664	0.0072645	0.091597	-2.5781	C11orf1	chromosome 11 open reading frame 1
79814	-1.7362	4.6679	-2.9664	0.0072652	0.091597	-2.5781	AGMAT	agmatinase
23199	-1.9893	7.8424	-2.9662	0.0072677	0.091597	-2.5785	GSE1	Gse1 coiled-coil protein
7076	1.9588	12.745	2.9661	0.0072697	0.091597	-2.5787	TIMP1	TIMP metallopeptidase inhibitor 1
64770	-1.8264	7.3563	-2.9651	0.0072862	0.091686	-2.5808	CCDC14	coiled-coil domain containing 14
9688	-1.51	7.4616	-2.965	0.0072873	0.091686	-2.5809	NUP93	nucleoporin 93
84532	-1.7117	8.2996	-2.9646	0.0072944	0.091709	-2.5818	ACSS1	acyl-CoA synthetase short chain family member 1
80063	-2.229	7.0522	-2.9638	0.0073075	0.091807	-2.5835	ATF7IP2	activating transcription factor 7 interacting protein 2
2040	2.2039	13.088	2.9635	0.0073131	0.091811	-2.5842	STOM	stomatin
283588	-1.4731	7.8287	-2.9626	0.0073286	0.091855	-2.5861	283588	NA
5265	1.5297	15.287	2.9623	0.0073324	0.091855	-2.5866	SERPINA1	serpin family A member 1
407738	-1.8116	3.5544	-2.9623	0.0073325	0.091855	-2.5866	TAFA1	TAFA chemokine like family member 1
5447	1.7575	11.136	2.961	0.007355	0.09207	-2.5894	POR	cytochrome p450 oxidoreductase
8558	-1.8445	8.3837	-2.9595	0.0073801	0.092318	-2.5925	CDK10	cyclin dependent kinase 10
7280	-1.5474	8.1024	-2.9586	0.0073959	0.0924	-2.5944	TUBB2A	tubulin beta 2A class IIa
537	1.4798	14.13	2.9585	0.0073973	0.0924	-2.5946	ATP6AP1	ATPase H+ transporting accessory protein 1
100129792	-1.8659	3.1097	-2.9558	0.0074436	0.092911	-2.6003	CCDC152	coiled-coil domain containing 152
64399	2.9565	8.774	2.9546	0.0074632	0.093089	-2.6027	HHIP	hedgehog interacting protein
283677	1.2895	4.3397	2.9543	0.0074696	0.093101	-2.6035	REC114	REC114 meiotic recombination protein
5955	-1.6057	8.9768	-2.9535	0.0074831	0.093177	-2.6051	RCN2	reticulocalbin 2
3609	-1.6238	8.1592	-2.9533	0.0074864	0.093177	-2.6056	ILF3	interleukin enhancer binding factor 3
313	1.3569	12.709	2.9481	0.0075749	0.09411	-2.6163	AOAH	acyloxyacyl hydrolase
1964	-1.5766	9.8759	-2.948	0.0075773	0.09411	-2.6166	EIF1AX	eukaryotic translation initiation factor 1A X-linked
7287	1.6365	4.9487	2.9478	0.0075801	0.09411	-2.6169	TULP1	TUB like protein 1
9374	-1.9615	5.8964	-2.9477	0.007583	0.09411	-2.6173	PPT2	palmitoyl-protein thioesterase 2
342035	1.7769	3.3116	2.9472	0.0075918	0.094151	-2.6183	GLDN	gliomedin
100131234	1.5964	6.5857	2.9465	0.0076039	0.094234	-2.6198	MIR181A1HG	MIR181A1 host gene
80155	-2.0037	3.5636	-2.9461	0.00761	0.094242	-2.6205	NAA15	"N-alpha-acetyltransferase 15, NatA auxiliary subunit"
340198	1.6393	17.192	2.944	0.0076464	0.094626	-2.6249	IFITM4P	interferon induced transmembrane protein 4 pseudogene
10795	-1.7362	6.5426	-2.9435	0.0076557	0.094673	-2.626	ZNF268	zinc finger protein 268
80329	1.3724	4.4643	2.9417	0.007687	0.094945	-2.6297	ULBP1	UL16 binding protein 1
84172	-1.7336	5.051	-2.9416	0.0076887	0.094945	-2.6299	POLR1B	RNA polymerase I subunit B
55798	-1.5274	6.4285	-2.9409	0.007702	0.094973	-2.6315	METTL2B	methyltransferase like 2B
79876	-1.543	5.7521	-2.9405	0.0077083	0.094973	-2.6322	UBA5	ubiquitin like modifier activating enzyme 5
10081	-1.6431	8.4269	-2.9405	0.0077086	0.094973	-2.6323	PDCD7	programmed cell death 7
1535	1.5624	15.112	2.94	0.0077168	0.094973	-2.6332	CYBA	cytochrome b-245 alpha chain
642517	-1.9188	9.0754	-2.9399	0.0077183	0.094973	-2.6334	AGAP9	"ArfGAP with GTPase domain, ankyrin repeat and PH domain 9"
4817	1.2487	9.7068	2.939	0.0077344	0.095088	-2.6353	NIT1	nitrilase 1
84890	-1.94	5.2627	-2.9383	0.0077478	0.095088	-2.6369	ADO	2-aminoethanethiol dioxygenase
653677	-1.6138	3.3663	-2.9382	0.007749	0.095088	-2.637	SEC1P	"secretory blood group 1, pseudogene"
2058	-2.1045	8.8906	-2.9382	0.0077495	0.095088	-2.6371	EPRS1	glutamyl-prolyl-tRNA synthetase 1
10200	-2.0523	5.9237	-2.9362	0.0077838	0.095441	-2.6411	MPHOSPH6	M-phase phosphoprotein 6
91298	-1.5272	6.5436	-2.9355	0.007797	0.095488	-2.6427	C12orf29	chromosome 12 open reading frame 29
9917	-1.7924	8.3986	-2.9354	0.0077986	0.095488	-2.6429	FAM20B	FAM20B glycosaminoglycan xylosylkinase
79672	-1.7937	8.3301	-2.9348	0.0078092	0.09555	-2.6441	FN3KRP	fructosamine 3 kinase related protein
939	-1.728	9.0543	-2.9331	0.007839	0.095747	-2.6476	CD27	CD27 molecule
28951	-2.1267	5.5016	-2.933	0.0078419	0.095747	-2.6479	TRIB2	tribbles pseudokinase 2
931	-2.1716	6.7959	-2.933	0.0078419	0.095747	-2.6479	MS4A1	membrane spanning 4-domains A1
6175	-2.124	13.696	-2.9317	0.0078651	0.095922	-2.6506	RPLP0	ribosomal protein lateral stalk subunit P0
677681	1.8988	9.1971	2.9316	0.0078673	0.095922	-2.6509	SCARNA20	small Cajal body-specific RNA 20
85465	-2.2819	5.815	-2.9305	0.0078859	0.096082	-2.653	SELENOI	selenoprotein I
285097	-1.8836	3.5339	-2.9301	0.0078941	0.096114	-2.654	LOC285097	uncharacterized FLJ38379
22863	-1.8179	4.3051	-2.9287	0.0079182	0.096195	-2.6568	ATG14	autophagy related 14
147015	1.7981	12.521	2.9286	0.0079207	0.096195	-2.657	DHRS13	dehydrogenase/reductase 13
283143	1.3978	8.4701	2.928	0.0079318	0.096195	-2.6583	LINC00900	long intergenic non-protein coding RNA 900
23333	-1.9765	4.8509	-2.9279	0.0079339	0.096195	-2.6586	DPY19L1	dpy-19 like C-mannosyltransferase 1
64105	-2.5028	4.6636	-2.9276	0.0079398	0.096195	-2.6592	CENPK	centromere protein K
64805	-1.9162	5.0041	-2.9275	0.0079414	0.096195	-2.6594	P2RY12	purinergic receptor P2Y12
7358	-2.0423	5.2367	-2.9273	0.0079435	0.096195	-2.6597	UGDH	UDP-glucose 6-dehydrogenase
11275	2.0306	12.475	2.9267	0.0079548	0.096195	-2.661	KLHL2	kelch like family member 2
3205	1.6822	7.6145	2.9265	0.0079585	0.096195	-2.6614	HOXA9	homeobox A9
2272	-1.5601	4.5225	-2.9265	0.007959	0.096195	-2.6614	FHIT	fragile histidine triad diadenosine triphosphatase
1534	-2.4895	7.9728	-2.9263	0.0079617	0.096195	-2.6618	CYB561	cytochrome b561
10576	-1.8761	10.271	-2.9258	0.0079722	0.096195	-2.663	CCT2	chaperonin containing TCP1 subunit 2
26156	-1.6848	7.7758	-2.9257	0.0079744	0.096195	-2.6632	RSL1D1	ribosomal L1 domain containing 1
2833	-1.5157	8.8236	-2.9254	0.0079784	0.096195	-2.6637	CXCR3	C-X-C motif chemokine receptor 3
401124	-1.9303	2.9026	-2.9236	0.0080116	0.096528	-2.6675	DTHD1	death domain containing 1
54482	-1.6161	5.5736	-2.9229	0.0080243	0.096614	-2.6689	TRMT13	tRNA methyltransferase 13 homolog
5110	1.6464	11.325	2.921	0.0080602	0.096954	-2.673	PCMT1	protein-L-isoaspartate (D-aspartate) O-methyltransferase
3679	2.1864	12.279	2.9208	0.0080637	0.096954	-2.6734	ITGA7	integrin subunit alpha 7
55698	-1.5803	2.7385	-2.9204	0.0080713	0.096979	-2.6742	RADIL	Rap associating with DIL domain
974	-1.9685	7.0575	-2.9197	0.0080841	0.097065	-2.6757	CD79B	CD79b molecule
677795	1.3714	7.3243	2.9191	0.0080947	0.097111	-2.6769	SNORA5B	"small nucleolar RNA, H/ACA box 5B"
57508	-1.8628	3.6067	-2.9188	0.0081004	0.097111	-2.6775	INTS2	integrator complex subunit 2
163154	-1.7842	3.7634	-2.9185	0.0081047	0.097111	-2.678	PRR22	proline rich 22
3903	2.4971	11.76	2.9178	0.0081178	0.097201	-2.6795	LAIR1	leukocyte associated immunoglobulin like receptor 1
4054	-1.468	5.3173	-2.9175	0.0081241	0.097209	-2.6802	LTBP3	latent transforming growth factor beta binding protein 3
64744	1.4771	15.176	2.917	0.0081336	0.097256	-2.6813	SMAP2	small ArfGAP2
4752	-2.0102	5.1956	-2.9164	0.0081441	0.097315	-2.6824	NEK3	NIMA related kinase 3
4642	-2.1857	3.3092	-2.9151	0.0081687	0.097541	-2.6852	MYO1D	myosin ID
9886	-2.0489	6.5546	-2.9142	0.0081853	0.097607	-2.687	RHOBTB1	Rho related BTB domain containing 1
84549	-1.6613	6.9601	-2.9142	0.0081855	0.097607	-2.6871	MAK16	MAK16 homolog
643549	1.3486	14.58	2.9132	0.0082048	0.09777	-2.6892	643549	NA
10199	-1.4559	8.4294	-2.9127	0.0082144	0.097817	-2.6903	MPHOSPH10	M-phase phosphoprotein 10
3655	-1.8323	8.253	-2.912	0.0082274	0.09785	-2.6917	ITGA6	integrin subunit alpha 6
9683	1.3144	11.396	2.9119	0.0082284	0.09785	-2.6918	N4BP1	NEDD4 binding protein 1
51744	-1.8904	7.3625	-2.91	0.0082641	0.098207	-2.6958	CD244	CD244 molecule
125931	1.7924	8.5952	2.9093	0.0082767	0.098289	-2.6972	CEACAM20	CEA cell adhesion molecule 20
79613	-1.3438	7.0661	-2.9059	0.0083422	0.098999	-2.7043	TANGO6	transport and golgi organization 6 homolog
9500	-1.8848	6.55	-2.9053	0.0083527	0.099057	-2.7055	MAGED1	MAGE family member D1
653319	-1.7055	6.7471	-2.9048	0.0083633	0.099114	-2.7066	KIAA0895L	KIAA0895 like
340543	-1.6859	7.3972	-2.9044	0.00837	0.099121	-2.7074	TCEAL5	transcription elongation factor A like 5
64207	1.4848	9.5237	2.9041	0.0083769	0.099121	-2.7081	IRF2BPL	interferon regulatory factor 2 binding protein like
8900	2.4834	4.5093	2.9036	0.0083861	0.099121	-2.7091	CCNA1	cyclin A1
29906	1.6955	6.7291	2.9035	0.0083867	0.099121	-2.7092	ST8SIA5	"ST8 alpha-N-acetyl-neuraminide alpha-2,8-sialyltransferase 5"
84230	-1.8783	7.3821	-2.9023	0.0084103	0.099332	-2.7117	LRRC8C	leucine rich repeat containing 8 VRAC subunit C
348327	-1.7659	3.6983	-2.9019	0.0084181	0.099332	-2.7126	ZNF530	zinc finger protein 530
4297	-1.8874	8.5999	-2.9015	0.0084257	0.099332	-2.7134	KMT2A	lysine methyltransferase 2A
81550	-1.3757	4.3625	-2.9014	0.0084275	0.099332	-2.7136	TDRD3	tudor domain containing 3
1292	-1.5227	4.5312	-2.9005	0.0084444	0.099391	-2.7154	COL6A2	collagen type VI alpha 2 chain
51729	-1.5834	9.9138	-2.9005	0.0084456	0.099391	-2.7156	WBP11	WW domain binding protein 11
401474	-1.5158	3.7496	-2.9	0.0084551	0.099391	-2.7166	SAMD12	sterile alpha motif domain containing 12
27339	-1.6838	10.713	-2.9	0.0084554	0.099391	-2.7166	PRPF19	pre-mRNA processing factor 19
3625	2.9302	9.4847	2.8997	0.0084613	0.099393	-2.7173	INHBB	inhibin subunit beta B
9124	-2.1207	5.3283	-2.8991	0.0084724	0.099419	-2.7185	PDLIM1	PDZ and LIM domain 1
80221	-2.2752	5.8783	-2.899	0.008475	0.099419	-2.7187	ACSF2	acyl-CoA synthetase family member 2
9836	-1.596	5.7753	-2.8986	0.0084816	0.099429	-2.7194	LCMT2	leucine carboxyl methyltransferase 2
10561	-2.6405	10.179	-2.8977	0.008499	0.099515	-2.7213	IFI44	interferon induced protein 44
100506036	-1.7707	6.2623	-2.8976	0.0085003	0.099515	-2.7215	CNNM3-DT	CNNM3 divergent transcript
57488	-1.8404	9.3729	-2.8964	0.008524	0.099725	-2.724	ESYT2	extended synaptotagmin 2
51266	-1.9067	7.4849	-2.8957	0.0085386	0.099828	-2.7256	CLEC1B	C-type lectin domain family 1 member B
84705	-1.5195	6.418	-2.8953	0.0085454	0.09984	-2.7263	GTPBP3	"GTP binding protein 3, mitochondrial"
1840	-1.7178	3.9639	-2.895	0.0085521	0.099852	-2.727	DTX1	deltex E3 ubiquitin ligase 1
27153	-1.6298	6.3883	-2.894	0.0085716	0.099931	-2.7291	ZNF777	zinc finger protein 777
25896	-2.1372	5.3974	-2.8937	0.0085773	0.099931	-2.7297	INTS7	integrator complex subunit 7
2790	1.7587	15.597	2.8935	0.0085804	0.099931	-2.73	GNG10	G protein subunit gamma 10
2812	-1.7609	11.723	-2.8933	0.0085848	0.099931	-2.7305	GP1BB	glycoprotein Ib platelet subunit beta
3376	-2.0002	6.7655	-2.8931	0.0085878	0.099931	-2.7308	IARS1	isoleucyl-tRNA synthetase 1
116461	-1.4405	5.6207	-2.8928	0.008595	0.099949	-2.7316	TSEN15	tRNA splicing endonuclease subunit 15
91107	-1.8067	7.0009	-2.8924	0.008602	0.099963	-2.7323	TRIM47	tripartite motif containing 47
25885	-2.331	4.8025	-2.8899	0.0086512	0.10047	-2.7375	POLR1A	RNA polymerase I subunit A
51284	-1.899	5.8238	-2.8895	0.0086593	0.10049	-2.7383	TLR7	toll like receptor 7
133746	-1.726	6.9816	-2.8879	0.0086907	0.10077	-2.7416	JMY	"junction mediating and regulatory protein, p53 cofactor"
583	-1.5008	8.2862	-2.8877	0.0086949	0.10077	-2.7421	BBS2	Bardet-Biedl syndrome 2
54585	-1.789	5.6673	-2.8872	0.0087039	0.10081	-2.743	LZTFL1	leucine zipper transcription factor like 1
54512	1.9525	11.446	2.8852	0.0087451	0.10122	-2.7473	EXOSC4	exosome component 4
10257	-1.8986	2.9773	-2.8821	0.0088057	0.10185	-2.7536	ABCC4	ATP binding cassette subfamily C member 4
55003	-1.9637	6.1434	-2.8815	0.0088184	0.10193	-2.7549	PAK1IP1	PAK1 interacting protein 1
58477	-2.225	7.2208	-2.881	0.0088278	0.10194	-2.7559	SRPRB	SRP receptor subunit beta
9231	-2.1168	4.689	-2.8809	0.0088307	0.10194	-2.7562	DLG5	discs large MAGUK scaffold protein 5
677839	1.5562	9.8057	2.8794	0.0088599	0.10221	-2.7592	SNORA71C	"small nucleolar RNA, H/ACA box 71C"
23066	-1.6863	3.8999	-2.8781	0.0088875	0.10233	-2.762	CAND2	cullin associated and neddylation dissociated 2 (putative)
58472	1.4987	15.726	2.8779	0.0088903	0.10233	-2.7623	SQOR	sulfide quinone oxidoreductase
29103	-1.8366	6.7185	-2.8778	0.0088921	0.10233	-2.7625	DNAJC15	DnaJ heat shock protein family (Hsp40) member C15
55122	1.4312	11.951	2.8777	0.0088943	0.10233	-2.7627	AKIRIN2	akirin 2
55179	-1.7301	6.2797	-2.8773	0.0089027	0.10236	-2.7636	FAIM	Fas apoptotic inhibitory molecule
80271	1.8396	11.467	2.8759	0.0089308	0.10261	-2.7665	ITPKC	inositol-trisphosphate 3-kinase C
5569	-1.3806	8.1036	-2.8757	0.0089359	0.10261	-2.767	PKIA	cAMP-dependent protein kinase inhibitor alpha
200420	-1.5073	4.5763	-2.8752	0.0089453	0.10265	-2.7679	ALMS1P1	ALMS1 pseudogene 1
6191	-1.8489	14.39	-2.8745	0.0089605	0.10273	-2.7695	RPS4X	ribosomal protein S4 X-linked
5066	1.3856	11.273	2.874	0.00897	0.10273	-2.7704	PAM	peptidylglycine alpha-amidating monooxygenase
83862	1.8032	12.643	2.874	0.0089701	0.10273	-2.7705	TMEM120A	transmembrane protein 120A
4709	1.5037	14.803	2.8727	0.0089955	0.10292	-2.773	NDUFB3	NADH:ubiquinone oxidoreductase subunit B3
5899	1.5132	15.098	2.8726	0.0089989	0.10292	-2.7734	RALB	RAS like proto-oncogene B
79053	-1.6874	8.2165	-2.8711	0.0090285	0.10319	-2.7764	ALG8	"ALG8 alpha-1,3-glucosyltransferase"
389634	1.8738	7.866	2.8698	0.0090555	0.10343	-2.7791	LINC00937	long intergenic non-protein coding RNA 937
100128023	1.9684	5.5608	2.8686	0.0090813	0.10361	-2.7817	DPPA2P3	developmental pluripotency associated 2 pseudogene 3
114614	-1.4002	4.1274	-2.8683	0.0090863	0.10361	-2.7822	MIR155HG	MIR155 host gene
6741	-1.7714	9.4486	-2.8682	0.0090887	0.10361	-2.7824	SSB	small RNA binding exonuclease protection factor La
286367	-1.551	4.3635	-2.8673	0.0091071	0.10368	-2.7843	286367	NA
10099	-2.2891	7.6395	-2.8671	0.0091112	0.10368	-2.7847	TSPAN3	tetraspanin 3
5244	-2.0997	4.0744	-2.867	0.0091131	0.10368	-2.7849	ABCB4	ATP binding cassette subfamily B member 4
11328	1.9358	8.3514	2.8667	0.0091188	0.10368	-2.7854	FKBP9	FKBP prolyl isomerase 9
409	1.5035	15.718	2.8662	0.0091301	0.10374	-2.7866	ARRB2	arrestin beta 2
8996	1.3958	9.6353	2.8648	0.0091587	0.10399	-2.7894	NOL3	nucleolar protein 3
963	1.3112	15.36	2.8629	0.0091986	0.10427	-2.7934	CD53	CD53 molecule
760	-1.6	9.0625	-2.8628	0.0092002	0.10427	-2.7935	CA2	carbonic anhydrase 2
26577	3.7235	7.1026	2.8623	0.0092109	0.10427	-2.7946	PCOLCE2	procollagen C-endopeptidase enhancer 2
10409	2.1305	16.701	2.8623	0.009211	0.10427	-2.7946	BASP1	brain abundant membrane attached signal protein 1
839	-1.4373	6.8765	-2.8622	0.0092134	0.10427	-2.7948	CASP6	caspase 6
150165	2.1697	6.7811	2.8613	0.0092313	0.10435	-2.7966	XKR3	XK related 3
56623	-1.6722	8.6486	-2.8611	0.009237	0.10435	-2.7971	INPP5E	inositol polyphosphate-5-phosphatase E
55151	-1.2191	6.0106	-2.861	0.0092377	0.10435	-2.7972	TMEM38B	transmembrane protein 38B
2169	2.0271	3.3093	2.8607	0.0092457	0.10437	-2.798	FABP2	fatty acid binding protein 2
80321	-1.6625	4.4845	-2.8597	0.0092654	0.1044	-2.7999	CEP70	centrosomal protein 70
65010	1.7839	9.5619	2.8592	0.0092773	0.1044	-2.8011	SLC26A6	solute carrier family 26 member 6
161742	-1.5757	3.3953	-2.8591	0.0092782	0.1044	-2.8012	SPRED1	sprouty related EVH1 domain containing 1
3988	-2.4339	9.1092	-2.859	0.0092797	0.1044	-2.8013	LIPA	"lipase A, lysosomal acid type"
26784	1.8004	11.344	2.8587	0.009287	0.1044	-2.8021	SNORA64	"small nucleolar RNA, H/ACA box 64"
2149	-1.8664	6.0635	-2.8586	0.009288	0.1044	-2.8022	F2R	coagulation factor II thrombin receptor
55177	-1.431	7.9651	-2.8585	0.0092903	0.1044	-2.8024	RMDN3	regulator of microtubule dynamics 3
55129	1.6994	11.712	2.8579	0.0093027	0.10447	-2.8036	ANO10	anoctamin 10
79684	-1.736	5.2963	-2.8575	0.0093121	0.10451	-2.8045	MSANTD2	Myb/SANT DNA binding domain containing 2
128	-1.9343	6.4548	-2.856	0.0093431	0.10477	-2.8075	ADH5	"alcohol dehydrogenase 5 (class III), chi polypeptide"
285154	1.7831	7.4617	2.8558	0.0093474	0.10477	-2.808	CYP1B1-AS1	CYP1B1 antisense RNA 1
6736	2.1221	2.7065	2.8553	0.0093596	0.10483	-2.8091	SRY	sex determining region Y
81631	1.4574	13.289	2.8532	0.0094025	0.10525	-2.8133	MAP1LC3B	microtubule associated protein 1 light chain 3 beta
100506779	-1.3127	8.5359	-2.8529	0.0094094	0.10526	-2.814	TSPOAP1-AS1	"TSPOAP1, SUPT4H1 and RNF43 antisense RNA 1"
50840	-1.4457	4.6908	-2.8497	0.0094779	0.10596	-2.8206	TAS2R14	taste 2 receptor member 14
57568	2.2443	12.07	2.849	0.0094939	0.10606	-2.8221	SIPA1L2	signal induced proliferation associated 1 like 2
392288	1.5807	11.946	2.8484	0.0095072	0.10607	-2.8234	MAP1LC3BP1	microtubule associated protein 1 light chain 3 beta pseudogene 1
54991	-1.5897	5.9128	-2.8483	0.009509	0.10607	-2.8235	C1orf159	chromosome 1 open reading frame 159
162967	-1.2216	6.5694	-2.848	0.009515	0.10607	-2.8241	ZNF320	zinc finger protein 320
9678	-1.9535	6.0897	-2.8478	0.009519	0.10607	-2.8245	PHF14	PHD finger protein 14
22880	-1.9876	4.8343	-2.8475	0.009526	0.10608	-2.8252	MORC2	MORC family CW-type zinc finger 2
10398	-1.7272	6.2486	-2.8472	0.0095322	0.10608	-2.8258	MYL9	myosin light chain 9
640	-2.4266	6.8681	-2.8451	0.0095768	0.10651	-2.83	BLK	"BLK proto-oncogene, Src family tyrosine kinase"
166012	1.7315	10.164	2.8436	0.0096108	0.10682	-2.8332	CHST13	carbohydrate sulfotransferase 13
3559	-1.9177	4.7968	-2.8433	0.0096169	0.10682	-2.8338	IL2RA	interleukin 2 receptor subunit alpha
610	1.8467	13.036	2.8429	0.0096244	0.10684	-2.8345	HCN2	hyperpolarization activated cyclic nucleotide gated potassium and sodium channel 2
8705	1.5725	12.274	2.8417	0.009652	0.10707	-2.8371	B3GALT4	"beta-1,3-galactosyltransferase 4"
100505827	1.8211	3.4424	2.8405	0.0096778	0.10722	-2.8395	100505827	NA
162966	-1.3602	7.3406	-2.8405	0.0096788	0.10722	-2.8396	ZNF600	zinc finger protein 600
51754	-1.5291	5.7608	-2.84	0.0096886	0.10722	-2.8406	TMEM8B	transmembrane protein 8B
81929	-1.5127	6.1418	-2.8399	0.00969	0.10722	-2.8407	SEH1L	SEH1 like nucleoporin
9260	1.7888	12.88	2.8384	0.0097238	0.10753	-2.8439	PDLIM7	PDZ and LIM domain 7
55901	-2.2894	6.4399	-2.8374	0.0097459	0.10764	-2.8459	THSD1	thrombospondin type 1 domain containing 1
401312	-1.647	4.7847	-2.8372	0.0097494	0.10764	-2.8462	LOC401312	uncharacterized LOC401312
100049587	3.0745	11.776	2.8371	0.0097525	0.10764	-2.8465	SIGLEC14	sialic acid binding Ig like lectin 14
4142	2.1279	2.7086	2.8365	0.009765	0.10771	-2.8477	MAS1	"MAS1 proto-oncogene, G protein-coupled receptor"
27340	-1.8757	5.4782	-2.8343	0.0098144	0.10818	-2.8523	UTP20	UTP20 small subunit processome component
23252	-2.5599	5.4571	-2.8338	0.0098248	0.10823	-2.8532	OTUD3	OTU deubiquitinase 3
84333	-1.6633	9.389	-2.8331	0.0098422	0.10827	-2.8549	PCGF5	polycomb group ring finger 5
91750	-1.4171	5.2253	-2.8329	0.0098456	0.10827	-2.8552	LIN52	lin-52 DREAM MuvB core complex component
1378	2.3205	11.235	2.8328	0.009847	0.10827	-2.8553	CR1	complement C3b/C4b receptor 1 (Knops blood group)
644189	-1.5568	5.856	-2.8322	0.0098614	0.10836	-2.8566	LOC644189	acyl-CoA thioesterase 4 pseudogene
24138	-2.0175	10.421	-2.8309	0.0098898	0.1086	-2.8592	IFIT5	interferon induced protein with tetratricopeptide repeats 5
7746	-1.4929	5.7052	-2.8304	0.0099008	0.10865	-2.8603	ZSCAN9	zinc finger and SCAN domain containing 9
10321	2.1351	4.006	2.8297	0.0099172	0.10876	-2.8618	CRISP3	cysteine rich secretory protein 3
221830	-2.0643	5.8355	-2.8284	0.0099453	0.109	-2.8643	TWISTNB	TWIST neighbor
3978	-1.5401	8.2216	-2.8265	0.0099891	0.10941	-2.8683	LIG1	DNA ligase 1
54814	-1.4796	3.9114	-2.8256	0.01001	0.10958	-2.8703	QPCTL	glutaminyl-peptide cyclotransferase like
22993	-1.8093	8.3176	-2.8247	0.01003	0.10973	-2.8721	HMGXB3	HMG-box containing 3
51316	2.6087	12.889	2.8243	0.010039	0.10976	-2.8729	PLAC8	placenta associated 8
201562	-2.0887	6.2536	-2.8239	0.010048	0.10978	-2.8737	HACD2	3-hydroxyacyl-CoA dehydratase 2
338620	-3.054	7.2574	-2.8169	0.010208	0.11146	-2.888	338620	NA
26297	-2.0749	8.2438	-2.8164	0.01022	0.11152	-2.8891	SERGEF	secretion regulating guanine nucleotide exchange factor
641518	-1.8573	4.4691	-2.8155	0.01024	0.11167	-2.8909	LEF1-AS1	LEF1 antisense RNA 1
219738	-1.8179	6.0607	-2.8152	0.010248	0.11168	-2.8915	FAM241B	family with sequence similarity 241 member B
284346	-1.4128	6.3025	-2.8146	0.010261	0.11175	-2.8927	ZNF575	zinc finger protein 575
200010	1.7445	6.2045	2.8138	0.01028	0.11186	-2.8944	SLC5A9	solute carrier family 5 member 9
100873946	1.5512	5.5245	2.8135	0.010286	0.11186	-2.8949	VAV3-AS1	VAV3 antisense RNA 1
1438	1.7197	10.646	2.813	0.010299	0.11186	-2.8961	CSF2RA	colony stimulating factor 2 receptor subunit alpha
3730	2.778	4.8073	2.8127	0.010305	0.11186	-2.8966	ANOS1	anosmin 1
147727	-1.3034	8.2717	-2.8126	0.010308	0.11186	-2.8969	ILF3-DT	ILF3 divergent transcript
51734	1.7497	16.145	2.8124	0.010313	0.11186	-2.8973	MSRB1	methionine sulfoxide reductase B1
57611	2.4494	10.516	2.8119	0.010325	0.11186	-2.8984	ISLR2	immunoglobulin superfamily containing leucine rich repeat 2
440356	2.4927	3.0606	2.8118	0.010326	0.11186	-2.8985	CDIPTOSP	"CDIP transferase opposite strand, pseudogene"
875	1.915	11.289	2.8117	0.010329	0.11186	-2.8987	CBS	cystathionine beta-synthase
79731	-1.8245	5.3672	-2.8094	0.010382	0.11237	-2.9033	NARS2	"asparaginyl-tRNA synthetase 2, mitochondrial"
4317	3.0005	5.1926	2.8082	0.010411	0.11261	-2.9058	MMP8	matrix metallopeptidase 8
1241	1.4668	10.011	2.8076	0.010426	0.11268	-2.9072	LTB4R	leukotriene B4 receptor
51575	-1.7815	5.7049	-2.8074	0.01043	0.11268	-2.9075	ESF1	ESF1 nucleolar pre-rRNA processing protein homolog
57643	-1.6012	4.5985	-2.8067	0.010445	0.11268	-2.9089	ZSWIM5	zinc finger SWIM-type containing 5
345462	-1.5697	4.102	-2.8066	0.010449	0.11268	-2.9092	ZNF879	zinc finger protein 879
6590	2.8348	13.031	2.8065	0.01045	0.11268	-2.9092	SLPI	secretory leukocyte peptidase inhibitor
151651	1.5291	4.9557	2.8062	0.010458	0.11268	-2.9099	EFHB	EF-hand domain family member B
64864	-1.614	7.7032	-2.8056	0.010472	0.11268	-2.9112	RFX7	regulatory factor X7
7101	1.63	6.1316	2.8055	0.010475	0.11268	-2.9115	NR2E1	nuclear receptor subfamily 2 group E member 1
114787	1.4248	5.791	2.8054	0.010476	0.11268	-2.9115	GPRIN1	G protein regulated inducer of neurite outgrowth 1
55201	1.5382	13.611	2.8045	0.010499	0.11286	-2.9135	MAP1S	microtubule associated protein 1S
253461	-1.7888	4.1824	-2.8029	0.010536	0.11309	-2.9167	ZBTB38	zinc finger and BTB domain containing 38
63979	-1.563	3.2465	-2.8027	0.01054	0.11309	-2.9171	FIGNL1	fidgetin like 1
55156	-1.8013	6.8071	-2.8027	0.01054	0.11309	-2.9171	ARMC1	armadillo repeat containing 1
896	1.265	13.026	2.802	0.010557	0.1132	-2.9185	CCND3	cyclin D3
9730	-1.4728	5.2228	-2.8017	0.010564	0.1132	-2.9191	DCAF1	DDB1 and CUL4 associated factor 1
81887	-1.5553	9.2191	-2.8011	0.010578	0.11329	-2.9204	LAS1L	LAS1 like ribosome biogenesis factor
3394	-2.2933	8.4673	-2.799	0.010629	0.11369	-2.9247	IRF8	interferon regulatory factor 8
2937	-1.7079	8.1282	-2.7986	0.010637	0.11369	-2.9254	GSS	glutathione synthetase
1802	-1.8775	6.3017	-2.7985	0.010642	0.11369	-2.9258	DPH2	diphthamide biosynthesis 2
26059	1.38	3.3305	2.7985	0.010642	0.11369	-2.9258	ERC2	ELKS/RAB6-interacting/CAST family member 2
9410	-1.6475	5.7472	-2.7981	0.010651	0.11372	-2.9265	SNRNP40	small nuclear ribonucleoprotein U5 subunit 40
80164	1.9501	12.335	2.797	0.010677	0.11393	-2.9288	PRR36	proline rich 36
163081	-1.6371	5.8334	-2.7958	0.010706	0.11408	-2.9312	ZNF567	zinc finger protein 567
53405	1.6246	12.768	2.7956	0.010711	0.11408	-2.9317	CLIC5	chloride intracellular channel 5
26777	1.4689	8.8972	2.7956	0.010711	0.11408	-2.9317	SNORA71A	"small nucleolar RNA, H/ACA box 71A"
9910	-1.8431	9.5789	-2.7943	0.010742	0.11434	-2.9343	RABGAP1L	RAB GTPase activating protein 1 like
146198	-1.9093	7.9083	-2.7937	0.010758	0.11444	-2.9356	ZFP90	ZFP90 zinc finger protein
11222	-2.1179	7.0966	-2.7928	0.010778	0.11459	-2.9374	MRPL3	mitochondrial ribosomal protein L3
84928	-1.7648	7.7	-2.7916	0.010807	0.11482	-2.9397	TMEM209	transmembrane protein 209
4649	-1.7298	7.9537	-2.7912	0.010818	0.11483	-2.9406	MYO9A	myosin IXA
155370	-1.2196	8.2849	-2.791	0.010821	0.11483	-2.9409	SBDSP1	SBDS pseudogene 1
5578	-2.6448	7.3225	-2.7906	0.010833	0.11488	-2.9419	PRKCA	protein kinase C alpha
1482	1.7355	14.908	2.7897	0.010854	0.11504	-2.9437	NKX2-5	NK2 homeobox 5
83692	1.8274	11.1	2.7881	0.010893	0.11538	-2.9469	CD99L2	CD99 molecule like 2
1875	-1.9077	5.1003	-2.7869	0.010922	0.11561	-2.9493	E2F5	E2F transcription factor 5
91687	-1.5383	3.2907	-2.7863	0.010936	0.11565	-2.9506	CENPL	centromere protein L
158295	-1.8125	5.0979	-2.7862	0.010939	0.11565	-2.9507	158295	NA
6648	1.8928	17.178	2.7854	0.010959	0.11574	-2.9525	SOD2	superoxide dismutase 2
377677	-1.7067	5.4565	-2.7853	0.010961	0.11574	-2.9526	CA13	carbonic anhydrase 13
3303	1.6139	15.96	2.7851	0.010967	0.11574	-2.9531	HSPA1A	heat shock protein family A (Hsp70) member 1A
89894	-1.4568	7.3864	-2.7848	0.010975	0.11576	-2.9538	TMEM116	transmembrane protein 116
79701	-1.5037	5.1112	-2.7843	0.010986	0.11578	-2.9547	OGFOD3	2-oxoglutarate and iron dependent oxygenase domain containing 3
10544	-1.6841	5.0064	-2.7841	0.010992	0.11578	-2.9552	PROCR	protein C receptor
284697	1.3628	5.2811	2.7838	0.010999	0.11578	-2.9557	BTBD8	BTB domain containing 8
120534	-1.9073	7.6339	-2.7836	0.011004	0.11578	-2.9562	ARL14EP	ADP ribosylation factor like GTPase 14 effector protein
113402	1.4288	12.87	2.7817	0.011051	0.11621	-2.96	SFT2D1	SFT2 domain containing 1
90139	-1.3494	6.2299	-2.781	0.011069	0.11632	-2.9614	TSPAN18	tetraspanin 18
57404	-1.682	8.0439	-2.7803	0.011085	0.11642	-2.9628	CYP20A1	cytochrome P450 family 20 subfamily A member 1
25926	-1.4587	7.3576	-2.7801	0.011092	0.11642	-2.9634	NOL11	nucleolar protein 11
5116	-1.6464	7.7628	-2.7797	0.0111	0.11642	-2.964	PCNT	pericentrin
5739	-1.9692	6.5205	-2.7795	0.011106	0.11642	-2.9645	PTGIR	prostaglandin I2 receptor
9100	1.6493	13.329	2.7786	0.011128	0.11659	-2.9663	USP10	ubiquitin specific peptidase 10
51202	-1.4812	10.439	-2.7778	0.011149	0.11674	-2.968	DDX47	DEAD-box helicase 47
9277	-1.5552	5.4271	-2.7765	0.011182	0.117	-2.9707	WDR46	WD repeat domain 46
100499489	-1.5421	6.444	-2.7763	0.011187	0.117	-2.9711	LOC100499489	uncharacterized LOC100499489
677778	2.395	4.3841	2.7756	0.011203	0.11709	-2.9724	SCARNA15	small Cajal body-specific RNA 15
6391	1.4612	11.27	2.7732	0.011265	0.11767	-2.9774	SDHC	succinate dehydrogenase complex subunit C
84255	1.6706	11.912	2.7729	0.011273	0.11768	-2.978	SLC37A3	solute carrier family 37 member 3
100996573	1.408	8.517	2.7723	0.011287	0.11773	-2.9791	100996573	NA
10693	-1.554	5.5645	-2.772	0.011296	0.11773	-2.9799	CCT6B	chaperonin containing TCP1 subunit 6B
2023	1.5613	12.289	2.7719	0.011298	0.11773	-2.98	ENO1	enolase 1
126295	-1.6946	4.0791	-2.7714	0.011311	0.1178	-2.9811	ZNF57	zinc finger protein 57
152225	-2.0903	3.9306	-2.7707	0.011327	0.11789	-2.9824	LINC02085	long intergenic non-protein coding RNA 2085
911	-1.4038	3.5339	-2.7704	0.011336	0.11791	-2.9831	CD1C	CD1c molecule
23306	-1.5866	6.7042	-2.7692	0.011366	0.11807	-2.9854	NEMP1	nuclear envelope integral membrane protein 1
29760	-2.2328	5.1537	-2.7688	0.011376	0.11807	-2.9863	BLNK	B cell linker
27229	-1.6387	4.6375	-2.7685	0.011383	0.11807	-2.9868	TUBGCP4	tubulin gamma complex associated protein 4
64284	1.855	3.5147	2.7685	0.011384	0.11807	-2.9869	RAB17	"RAB17, member RAS oncogene family"
375061	3.0057	9.9065	2.7684	0.011385	0.11807	-2.987	FAM89A	family with sequence similarity 89 member A
259283	-1.8002	4.3784	-2.7675	0.011409	0.11825	-2.9889	MDS2	myelodysplastic syndrome 2 translocation associated
116444	1.7124	7.0944	2.7672	0.011416	0.11825	-2.9895	GRIN3B	glutamate ionotropic receptor NMDA type subunit 3B
51523	-2.0428	8.4613	-2.7661	0.011446	0.11849	-2.9918	CXXC5	CXXC finger protein 5
51449	-2.055	6.3128	-2.7656	0.011458	0.11849	-2.9928	PCYOX1	prenylcysteine oxidase 1
2948	1.2612	9.5532	2.7655	0.011461	0.11849	-2.993	GSTM4	glutathione S-transferase mu 4
79600	-1.7935	8.5965	-2.765	0.011473	0.11849	-2.994	TCTN1	tectonic family member 1
9125	-1.1881	4.7046	-2.765	0.011473	0.11849	-2.994	CNOT9	CCR4-NOT transcription complex subunit 9
9694	1.3773	10.42	2.7646	0.011484	0.11853	-2.9949	EMC2	ER membrane protein complex subunit 2
157927	1.7927	11.54	2.7635	0.011512	0.11872	-2.9971	C9orf62	chromosome 9 open reading frame 62
23654	-2.0021	6.8347	-2.7633	0.011516	0.11872	-2.9974	PLXNB2	plexin B2
55049	-1.6267	10.089	-2.7615	0.011565	0.11914	-3.0012	REX1BD	required for excision 1-B domain containing
1298	1.5697	8.8581	2.7612	0.011571	0.11914	-3.0017	COL9A2	collagen type IX alpha 2 chain
140739	1.448	10.936	2.7596	0.011614	0.11952	-3.005	UBE2F	ubiquitin conjugating enzyme E2 F (putative)
283578	1.2122	6.2131	2.7589	0.011633	0.1196	-3.0065	TMED8	transmembrane p24 trafficking protein family member 8
4430	2.7225	4.0374	2.7586	0.01164	0.1196	-3.0071	MYO1B	myosin IB
79863	-1.6537	6.1465	-2.7585	0.011643	0.1196	-3.0073	RBFA	ribosome binding factor A
55450	-1.7613	5.4555	-2.7579	0.011659	0.1197	-3.0085	CAMK2N1	calcium/calmodulin dependent protein kinase II inhibitor 1
221504	-1.5735	4.0935	-2.7576	0.011666	0.1197	-3.0091	ZBTB9	zinc finger and BTB domain containing 9
51227	-1.9948	6.5804	-2.7571	0.011679	0.11973	-3.0101	PIGP	phosphatidylinositol glycan anchor biosynthesis class P
54465	-1.9446	6.0472	-2.7566	0.011693	0.11973	-3.0111	ETAA1	ETAA1 activator of ATR kinase
5732	1.6575	11.773	2.7566	0.011693	0.11973	-3.0112	PTGER2	prostaglandin E receptor 2
84899	-1.9628	5.6163	-2.7564	0.011697	0.11973	-3.0114	TMTC4	transmembrane O-mannosyltransferase targeting cadherins 4
388564	1.5055	13.773	2.7555	0.011722	0.11983	-3.0134	TMEM238	transmembrane protein 238
28955	-1.694	8.7695	-2.7551	0.01173	0.11983	-3.0141	DEXI	Dexi homolog
8609	1.9351	10.891	2.755	0.011734	0.11983	-3.0143	KLF7	Kruppel like factor 7
677800	1.8584	11.787	2.7548	0.01174	0.11983	-3.0148	SNORA12	"small nucleolar RNA, H/ACA box 12"
10567	1.6339	15.403	2.7547	0.011741	0.11983	-3.0149	RABAC1	Rab acceptor 1
5010	1.9172	4.518	2.7533	0.011778	0.12012	-3.0178	CLDN11	claudin 11
51001	-1.4231	6.7881	-2.7528	0.011793	0.12012	-3.0189	MTERF3	mitochondrial transcription termination factor 3
26511	1.4072	11.247	2.7527	0.011794	0.12012	-3.019	CHIC2	cysteine rich hydrophobic domain 2
7730	-1.7243	4.8779	-2.7526	0.011797	0.12012	-3.0192	ZNF177	zinc finger protein 177
285958	-1.3823	8.4692	-2.7515	0.011826	0.12034	-3.0214	SNHG15	small nucleolar RNA host gene 15
29090	-1.5169	7.5397	-2.7511	0.011838	0.12034	-3.0223	TIMM21	translocase of inner mitochondrial membrane 21
26012	-1.513	5.4861	-2.751	0.01184	0.12034	-3.0224	NSMF	NMDA receptor synaptonuclear signaling and neuronal migration factor
9801	-1.9034	6.7918	-2.75	0.011868	0.12055	-3.0246	MRPL19	mitochondrial ribosomal protein L19
158401	1.9673	3.3657	2.7491	0.011889	0.1207	-3.0262	SHOC1	shortage in chiasmata 1
9666	-1.5884	5.6018	-2.7468	0.011953	0.12128	-3.0311	DZIP3	DAZ interacting zinc finger protein 3
3835	-1.4042	7.0515	-2.7452	0.011995	0.12164	-3.0343	KIF22	kinesin family member 22
79590	-1.4999	8.2008	-2.7442	0.012022	0.12172	-3.0363	MRPL24	mitochondrial ribosomal protein L24
10491	-1.3759	3.8324	-2.7442	0.012022	0.12172	-3.0363	CRTAP	cartilage associated protein
90853	-2.0831	5.8811	-2.7441	0.012025	0.12172	-3.0365	SPOCD1	SPOC domain containing 1
401093	2.0312	3.7881	2.743	0.012053	0.12194	-3.0386	MBNL1-AS1	MBNL1 antisense RNA 1
54498	-2.0415	7.1376	-2.7426	0.012065	0.12199	-3.0395	SMOX	spermine oxidase
391634	-1.6372	9.0923	-2.7422	0.012075	0.12201	-3.0403	HSP90AB2P	"heat shock protein 90 alpha family class B member 2, pseudogene"
10799	-1.4738	5.2482	-2.7419	0.012085	0.12205	-3.041	RPP40	ribonuclease P/MRP subunit p40
57213	-1.4748	3.5258	-2.7414	0.012096	0.12209	-3.0418	SPRYD7	SPRY domain containing 7
147798	1.5977	8.77	2.7411	0.012106	0.12211	-3.0426	TMC4	transmembrane channel like 4
25902	1.3166	6.0596	2.7407	0.012116	0.12215	-3.0433	MTHFD1L	methylenetetrahydrofolate dehydrogenase (NADP+ dependent) 1 like
54836	-1.4068	4.6069	-2.74	0.012136	0.12217	-3.0448	BSPRY	B-box and SPRY domain containing
255738	3.6899	6.287	2.7398	0.012141	0.12217	-3.0452	PCSK9	proprotein convertase subtilisin/kexin type 9
55128	-1.6484	6.2026	-2.7395	0.01215	0.12217	-3.0458	TRIM68	tripartite motif containing 68
6633	-1.8947	10.9	-2.7394	0.012153	0.12217	-3.0461	SNRPD2	small nuclear ribonucleoprotein D2 polypeptide
56915	-1.9592	4.0838	-2.7393	0.012154	0.12217	-3.0461	EXOSC5	exosome component 5
54432	1.2947	12.749	2.7391	0.012161	0.12217	-3.0467	YIPF1	Yip1 domain family member 1
8891	-1.7213	5.6598	-2.7335	0.012312	0.12362	-3.0578	EIF2B3	eukaryotic translation initiation factor 2B subunit gamma
9050	1.8106	9.8155	2.7331	0.012325	0.12366	-3.0588	PSTPIP2	proline-serine-threonine phosphatase interacting protein 2
390226	1.388	3.8692	2.7329	0.012331	0.12366	-3.0592	GUCY2EP	"guanylate cyclase 2E, pseudogene"
6285	-2.234	5.001	-2.7319	0.012358	0.12386	-3.0612	S100B	S100 calcium binding protein B
55308	-1.5575	7.9936	-2.7295	0.012424	0.12446	-3.066	DDX19A	DEAD-box helicase 19A
28969	-1.4819	8.2589	-2.7289	0.012442	0.12456	-3.0673	BZW2	basic leucine zipper and W2 domains 2
4261	-1.9701	8.2104	-2.7283	0.012459	0.12466	-3.0685	CIITA	class II major histocompatibility complex transactivator
2628	-1.6138	3.8476	-2.7277	0.012473	0.12473	-3.0696	GATM	glycine amidinotransferase
6261	-1.4567	3.8315	-2.7268	0.012499	0.12492	-3.0715	RYR1	ryanodine receptor 1
79626	1.2979	12.943	2.7246	0.012561	0.12542	-3.0759	TNFAIP8L2	TNF alpha induced protein 8 like 2
56675	1.2535	7.6976	2.7245	0.012563	0.12542	-3.0761	NRIP3	nuclear receptor interacting protein 3
10588	1.6717	14.626	2.7236	0.012588	0.12559	-3.0779	MTHFS	methenyltetrahydrofolate synthetase
57159	2.6225	10.18	2.7232	0.0126	0.12562	-3.0788	TRIM54	tripartite motif containing 54
84935	1.2285	4.9387	2.723	0.012606	0.12562	-3.0792	MEDAG	mesenteric estrogen dependent adipogenesis
641371	-1.5303	7.6714	-2.722	0.012635	0.12584	-3.0813	ACOT1	acyl-CoA thioesterase 1
94163	-1.3148	7.2256	-2.7215	0.012649	0.12591	-3.0823	SNORD38B	"small nucleolar RNA, C/D box 38B"
3113	-2.3447	11.196	-2.721	0.012663	0.12598	-3.0833	HLA-DPA1	"major histocompatibility complex, class II, DP alpha 1"
211	1.4599	10.087	2.7201	0.012687	0.12609	-3.0849	ALAS1	5'-aminolevulinate synthase 1
10120	-1.1538	8.4713	-2.72	0.012689	0.12609	-3.0851	ACTR1B	actin related protein 1B
51004	-1.3398	5.9357	-2.7196	0.012702	0.12615	-3.0861	COQ6	"coenzyme Q6, monooxygenase"
91380	-1.653	5.308	-2.7172	0.012771	0.12676	-3.0909	SNORD107	"small nucleolar RNA, C/D box 107"
55340	-2.2268	8.6741	-2.7168	0.012782	0.1268	-3.0917	GIMAP5	"GTPase, IMAP family member 5"
9669	-1.8625	6.2183	-2.7162	0.012798	0.12688	-3.0928	EIF5B	eukaryotic translation initiation factor 5B
541565	1.586	13.066	2.7154	0.012821	0.12703	-3.0944	C8orf58	chromosome 8 open reading frame 58
146225	2.2275	15.081	2.7152	0.012828	0.12704	-3.095	CMTM2	CKLF like MARVEL transmembrane domain containing 2
100506736	-1.7346	3.4297	-2.7142	0.012856	0.12723	-3.0969	SLFN12L	schlafen family member 12 like
7043	-1.3282	3.6349	-2.714	0.012862	0.12723	-3.0974	TGFB3	transforming growth factor beta 3
80146	-1.2911	7.8767	-2.7122	0.012914	0.12766	-3.101	UXS1	UDP-glucuronate decarboxylase 1
401106	1.4241	7.0798	2.7119	0.012921	0.12766	-3.1015	LINC00884	long intergenic non-protein coding RNA 884
8875	1.8597	17.009	2.7116	0.012932	0.1277	-3.1023	VNN2	vanin 2
9924	-1.5593	6.8855	-2.7111	0.012944	0.12771	-3.1031	PAN2	poly(A) specific ribonuclease subunit PAN2
147650	1.6297	10.459	2.711	0.012947	0.12771	-3.1033	SPACA6	sperm acrosome associated 6
3566	1.4851	15.757	2.7107	0.012957	0.12773	-3.104	IL4R	interleukin 4 receptor
64841	-1.8926	5.5678	-2.7104	0.012966	0.12774	-3.1046	GNPNAT1	glucosamine-phosphate N-acetyltransferase 1
25780	-2.0294	5.0746	-2.7098	0.012982	0.12778	-3.1057	RASGRP3	RAS guanyl releasing protein 3
729187	1.9605	4.6539	2.7097	0.012985	0.12778	-3.1059	729187	NA
10988	-1.7675	8.4544	-2.7086	0.013017	0.12803	-3.1082	METAP2	methionyl aminopeptidase 2
219790	-1.5314	4.8276	-2.7079	0.013037	0.1281	-3.1095	RTKN2	rhotekin 2
79712	1.4263	10.327	2.7079	0.013039	0.1281	-3.1097	GTDC1	glycosyltransferase like domain containing 1
85320	1.7116	3.8125	2.7074	0.013052	0.12816	-3.1106	ABCC11	ATP binding cassette subfamily C member 11
4074	-1.4823	8.2484	-2.7062	0.013088	0.12844	-3.1131	M6PR	"mannose-6-phosphate receptor, cation dependent"
100287482	-1.5324	5.1071	-2.7053	0.013113	0.12861	-3.1148	SMKR1	small lysine rich protein 1
114819	-1.6787	4.0178	-2.7041	0.01315	0.12885	-3.1174	CROCCP3	CROCC pseudogene 3
84225	1.6712	10.579	2.7037	0.013161	0.12885	-3.1181	ZMYND15	zinc finger MYND-type containing 15
4931	-1.3683	8.8389	-2.7036	0.013164	0.12885	-3.1183	NVL	nuclear VCP like
51081	-1.5771	6.856	-2.7035	0.013168	0.12885	-3.1186	MRPS7	mitochondrial ribosomal protein S7
5001	-1.5755	6.6535	-2.7025	0.013197	0.12903	-3.1205	ORC5	origin recognition complex subunit 5
25798	1.6312	15.399	2.7024	0.0132	0.12903	-3.1208	BRI3	brain protein I3
116159	2.7962	5.5369	2.7017	0.013219	0.12914	-3.1221	CYYR1	cysteine and tyrosine rich 1
8078	-1.3463	5.8512	-2.7009	0.013244	0.12931	-3.1238	USP5	ubiquitin specific peptidase 5
59269	-1.8045	6.2175	-2.6982	0.013324	0.12997	-3.1292	HIVEP3	HIVEP zinc finger 3
128178	1.4065	11.998	2.6981	0.013327	0.12997	-3.1294	EDARADD	EDAR associated death domain
116113	1.8324	12.522	2.6975	0.013343	0.13001	-3.1305	FOXP4	forkhead box P4
340554	-1.8501	2.5673	-2.6974	0.013346	0.13001	-3.1307	ZC3H12B	zinc finger CCCH-type containing 12B
57105	-1.4372	4.5449	-2.6967	0.013369	0.13013	-3.1322	CYSLTR2	cysteinyl leukotriene receptor 2
26520	-1.4926	9.4858	-2.6965	0.013373	0.13013	-3.1326	TIMM9	translocase of inner mitochondrial membrane 9
3249	1.899	4.4016	2.694	0.013449	0.1308	-3.1377	HPN	hepsin
253832	1.7204	8.5005	2.6921	0.013506	0.13128	-3.1415	ZDHHC20	zinc finger DHHC-type palmitoyltransferase 20
171568	-1.3057	8.1654	-2.6917	0.013517	0.13131	-3.1422	POLR3H	RNA polymerase III subunit H
9061	1.469	10.638	2.6907	0.013548	0.13154	-3.1443	PAPSS1	3'-phosphoadenosine 5'-phosphosulfate synthase 1
9324	-1.6537	7.7622	-2.6897	0.013578	0.13163	-3.1463	HMGN3	high mobility group nucleosomal binding domain 3
55272	-1.3981	9.8428	-2.6897	0.013578	0.13163	-3.1463	IMP3	IMP U3 small nucleolar ribonucleoprotein 3
79656	-2.0571	4.37	-2.6896	0.013581	0.13163	-3.1464	BEND5	BEN domain containing 5
64115	1.4572	15.817	2.6885	0.013615	0.13187	-3.1487	VSIR	V-set immunoregulatory receptor
340348	-1.3408	6.9855	-2.6883	0.01362	0.13187	-3.1491	TSPAN33	tetraspanin 33
8187	-1.7038	4.8094	-2.6876	0.013642	0.13197	-3.1505	ZNF239	zinc finger protein 239
132	-1.5617	8.2626	-2.6874	0.013646	0.13197	-3.1508	ADK	adenosine kinase
54765	-1.3077	8.5746	-2.6866	0.013671	0.13214	-3.1524	TRIM44	tripartite motif containing 44
89872	-1.6517	7.3675	-2.6863	0.01368	0.13216	-3.153	AQP10	aquaporin 10
9332	3.865	11.968	2.6858	0.013695	0.13222	-3.154	CD163	CD163 molecule
442240	-1.3141	5.5666	-2.6855	0.013706	0.13225	-3.1547	ZNF259P1	zinc finger protein 259 pseudogene 1
23568	-1.4114	8.9678	-2.6849	0.013723	0.13231	-3.1559	ARL2BP	ADP ribosylation factor like GTPase 2 binding protein
27334	-2.394	6.6666	-2.6848	0.013726	0.13231	-3.1561	P2RY10	P2Y receptor family member 10
677796	1.2996	8.2068	2.6845	0.013734	0.13231	-3.1566	SNORA5C	"small nucleolar RNA, H/ACA box 5C"
55253	-1.5162	7.4233	-2.6838	0.013758	0.13246	-3.1581	TYW1	tRNA-yW synthesizing protein 1 homolog
80776	1.4518	12.424	2.6835	0.013766	0.13247	-3.1587	B9D2	B9 domain containing 2
83860	-1.7994	7.8268	-2.6822	0.013804	0.13276	-3.1612	TAF3	TATA-box binding protein associated factor 3
400932	1.7532	2.6459	2.6798	0.013879	0.13341	-3.1661	LINC00898	long intergenic non-protein coding RNA 898
23184	-1.6688	5.77	-2.6792	0.013897	0.13351	-3.1672	MESD	mesoderm development LRP chaperone
28959	-1.6031	7.9291	-2.6788	0.01391	0.13356	-3.1681	TMEM176B	transmembrane protein 176B
196383	1.3822	16.031	2.6779	0.013937	0.13375	-3.1698	RILPL2	Rab interacting lysosomal protein like 2
4651	1.3802	8.5379	2.6775	0.013951	0.1338	-3.1707	MYO10	myosin X
54938	-1.6716	5.5914	-2.6762	0.013992	0.13406	-3.1734	SARS2	"seryl-tRNA synthetase 2, mitochondrial"
152195	1.6339	8.9796	2.6761	0.013994	0.13406	-3.1735	NUDT16P1	nudix hydrolase 16 pseudogene 1
51287	-2.1391	7.3633	-2.6754	0.014016	0.1342	-3.1749	COA4	cytochrome c oxidase assembly factor 4 homolog
339318	-1.4254	4.2792	-2.6746	0.014042	0.13435	-3.1766	ZNF181	zinc finger protein 181
908	-1.4232	10.565	-2.6744	0.014047	0.13435	-3.1769	CCT6A	chaperonin containing TCP1 subunit 6A
283316	2.0349	6.1192	2.6736	0.014071	0.13444	-3.1785	CD163L1	CD163 molecule like 1
225	-1.656	2.9628	-2.6736	0.014073	0.13444	-3.1785	ABCD2	ATP binding cassette subfamily D member 2
5536	-1.3924	4.0132	-2.6734	0.01408	0.13444	-3.179	PPP5C	protein phosphatase 5 catalytic subunit
115509	-1.6316	5.8651	-2.6728	0.014097	0.13454	-3.1801	ZNF689	zinc finger protein 689
205251	-2.3107	7.7449	-2.6721	0.014119	0.13467	-3.1815	MTLN	mitoregulin
23590	1.6007	8.2503	2.6709	0.014156	0.13488	-3.1839	PDSS1	decaprenyl diphosphate synthase subunit 1
55002	1.3278	9.0725	2.6707	0.014162	0.13488	-3.1843	TMCO3	transmembrane and coiled-coil domains 3
83999	2.2428	10.52	2.6707	0.014165	0.13488	-3.1844	KREMEN1	kringle containing transmembrane protein 1
78991	-1.5129	8.3362	-2.6704	0.014172	0.13488	-3.1849	PCYOX1L	prenylcysteine oxidase 1 like
2590	1.692	8.276	2.6689	0.014221	0.13524	-3.188	GALNT2	polypeptide N-acetylgalactosaminyltransferase 2
28378	-1.8378	3.8273	-2.6687	0.014226	0.13524	-3.1883	IGHV7-81	immunoglobulin heavy variable 7-81 (non-functional)
9619	1.7226	10.137	2.6673	0.014269	0.13557	-3.191	ABCG1	ATP binding cassette subfamily G member 1
9656	-1.5718	7.852	-2.6671	0.014276	0.13557	-3.1914	MDC1	mediator of DNA damage checkpoint 1
328	-1.4647	5.7283	-2.666	0.014313	0.13585	-3.1938	APEX1	apurinic/apyrimidinic endodeoxyribonuclease 1
100133130	-1.5929	3.9978	-2.6657	0.014321	0.13585	-3.1943	100133130	NA
388125	1.9997	6.6073	2.6654	0.014329	0.13586	-3.1948	C2CD4B	C2 calcium dependent domain containing 4B
219654	-1.9167	5.7403	-2.6649	0.014345	0.13592	-3.1958	ZCCHC24	zinc finger CCHC-type containing 24
2967	-2.0071	4.2527	-2.6647	0.014352	0.13592	-3.1963	GTF2H3	general transcription factor IIH subunit 3
3109	-2.7162	10.349	-2.6645	0.01436	0.13592	-3.1967	HLA-DMB	"major histocompatibility complex, class II, DM beta"
6432	-1.3146	9.7649	-2.6641	0.014374	0.13598	-3.1976	SRSF7	serine and arginine rich splicing factor 7
11025	1.5651	17.169	2.6635	0.01439	0.13603	-3.1986	LILRB3	leukocyte immunoglobulin like receptor B3
1831	1.3273	16.249	2.6632	0.014402	0.13603	-3.1994	TSC22D3	TSC22 domain family member 3
79621	-1.6042	9.1997	-2.6631	0.014404	0.13603	-3.1995	RNASEH2B	ribonuclease H2 subunit B
357	2.9288	4.1693	2.6629	0.014411	0.13603	-3.1999	SHROOM2	shroom family member 2
116369	2.4685	8.3612	2.6626	0.014419	0.13604	-3.2005	SLC26A8	solute carrier family 26 member 8
25998	-1.7915	8.1952	-2.66	0.014503	0.13666	-3.2057	IBTK	inhibitor of Bruton tyrosine kinase
54221	-1.3782	3.1211	-2.6599	0.014506	0.13666	-3.2059	SNTG2	syntrophin gamma 2
114034	-1.412	6.1152	-2.6597	0.014514	0.13666	-3.2064	TOE1	"target of EGR1, exonuclease"
81610	-2.2711	4.14	-2.6595	0.014519	0.13666	-3.2067	FAM83D	family with sequence similarity 83 member D
374470	-1.5928	5.4675	-2.6594	0.014524	0.13666	-3.207	C12orf42	chromosome 12 open reading frame 42
1628	-1.5678	6.4815	-2.6572	0.014593	0.1371	-3.2113	DBP	D-box binding PAR bZIP transcription factor
158434	1.7641	3.244	2.6569	0.014603	0.1371	-3.2119	LOC158434	uncharacterized LOC158434
100506999	1.3845	2.7743	2.6568	0.014606	0.1371	-3.212	LINC02318	long intergenic non-protein coding RNA 2318
9015	-1.3076	4.843	-2.6568	0.014607	0.1371	-3.2121	TAF1A	"TATA-box binding protein associated factor, RNA polymerase I subunit A"
160851	2.1774	3.2635	2.6567	0.014611	0.1371	-3.2124	DGKH	diacylglycerol kinase eta
133	2.333	16.768	2.6559	0.014636	0.13727	-3.2139	ADM	adrenomedullin
157247	-1.7797	6.2252	-2.6551	0.014661	0.13742	-3.2154	157247	NA
2745	1.5761	15.126	2.6548	0.01467	0.13742	-3.216	GLRX	glutaredoxin
8291	2.0859	12.683	2.6546	0.014677	0.13742	-3.2164	DYSF	dysferlin
56994	1.6263	10.771	2.6534	0.014717	0.13762	-3.2189	CHPT1	choline phosphotransferase 1
100128071	1.8898	11.811	2.6533	0.014722	0.13762	-3.2192	FAM229A	family with sequence similarity 229 member A
2329	-1.8091	4.23	-2.6532	0.014723	0.13762	-3.2192	FMO4	flavin containing dimethylaniline monoxygenase 4
58528	1.5175	10.732	2.6529	0.014732	0.13762	-3.2198	RRAGD	Ras related GTP binding D
79441	-1.2543	4.9917	-2.6528	0.014738	0.13762	-3.2202	HAUS3	HAUS augmin like complex subunit 3
284274	1.321	4.7493	2.6521	0.01476	0.13776	-3.2215	SMIM21	small integral membrane protein 21
2357	1.5231	17.363	2.6507	0.014804	0.13809	-3.2242	FPR1	formyl peptide receptor 1
9535	1.3875	17.972	2.6505	0.014813	0.1381	-3.2247	GMFG	glia maturation factor gamma
51499	-1.8046	7.0992	-2.6496	0.014841	0.13822	-3.2264	TRIAP1	TP53 regulated inhibitor of apoptosis 1
2806	-1.5864	9.8139	-2.6496	0.014842	0.13822	-3.2265	GOT2	glutamic-oxaloacetic transaminase 2
3977	1.9831	2.6692	2.6492	0.014855	0.13827	-3.2273	LIFR	LIF receptor subunit alpha
51128	1.6026	9.4609	2.6489	0.014864	0.13828	-3.2278	SAR1B	secretion associated Ras related GTPase 1B
10395	1.4869	5.2347	2.6479	0.014897	0.13851	-3.2298	DLC1	DLC1 Rho GTPase activating protein
619564	-1.7829	4.7719	-2.6475	0.014912	0.13853	-3.2307	SNORD72	"small nucleolar RNA, C/D box 72"
23409	-1.4048	4.2811	-2.6474	0.014915	0.13853	-3.2309	SIRT4	sirtuin 4
55785	-2.2564	3.4103	-2.647	0.014928	0.13858	-3.2317	FGD6	"FYVE, RhoGEF and PH domain containing 6"
100132724	-1.5415	7.0809	-2.6461	0.014958	0.13878	-3.2335	DCAF13P3	DDB1 and CUL4 associated factor 13 pseudogene 3
5954	-1.9273	6.3364	-2.6455	0.014976	0.1388	-3.2346	RCN1	reticulocalbin 1
6142	-1.9004	13.242	-2.6454	0.01498	0.1388	-3.2348	RPL18A	ribosomal protein L18a
3111	-1.6904	8.3114	-2.645	0.014994	0.1388	-3.2357	HLA-DOA	"major histocompatibility complex, class II, DO alpha"
338773	2.2722	8.8041	2.6448	0.015001	0.1388	-3.2361	TMEM119	transmembrane protein 119
646396	-1.4473	7.6666	-2.6447	0.015002	0.1388	-3.2362	REREP3	arginine-glutamic acid dipeptide repeats pseudogene 3
29063	-2.0259	5.5096	-2.6446	0.015008	0.1388	-3.2365	ZCCHC4	zinc finger CCHC-type containing 4
84823	-2.1431	4.8067	-2.6432	0.015054	0.13915	-3.2393	LMNB2	lamin B2
5045	1.3198	9.9012	2.6413	0.015116	0.13951	-3.243	FURIN	"furin, paired basic amino acid cleaving enzyme"
3118	-2.6933	7.4775	-2.6412	0.015119	0.13951	-3.2431	HLA-DQA2	"major histocompatibility complex, class II, DQ alpha 2"
115004	1.5434	9.4053	2.6412	0.01512	0.13951	-3.2432	CGAS	cyclic GMP-AMP synthase
1947	-1.5567	7.4957	-2.6411	0.015125	0.13951	-3.2435	EFNB1	ephrin B1
6775	-2.1352	8.1931	-2.6395	0.015178	0.13992	-3.2466	STAT4	signal transducer and activator of transcription 4
79809	-1.2039	5.7369	-2.6389	0.015196	0.13994	-3.2477	TTC21B	tetratricopeptide repeat domain 21B
1039	-1.4954	7.2392	-2.6387	0.015203	0.13994	-3.2481	CDR2	cerebellar degeneration related protein 2
200316	-1.6922	7.1854	-2.6387	0.015204	0.13994	-3.2482	APOBEC3F	apolipoprotein B mRNA editing enzyme catalytic subunit 3F
23310	-1.8348	7.4543	-2.6382	0.01522	0.13995	-3.2491	NCAPD3	non-SMC condensin II complex subunit D3
100506462	1.2708	5.5572	2.6382	0.015221	0.13995	-3.2492	SRD5A3-AS1	SRD5A3 antisense RNA 1
117144	2.0006	8.9356	2.6375	0.015245	0.1401	-3.2506	CATSPER1	cation channel sperm associated 1
9180	1.9621	7.385	2.6352	0.015323	0.14074	-3.2552	OSMR	oncostatin M receptor
644997	1.2218	9.3426	2.6348	0.015336	0.14079	-3.256	PIK3CD-AS1	PIK3CD antisense RNA 1
80270	1.5841	8.9565	2.6345	0.015346	0.1408	-3.2566	HSD3B7	"hydroxy-delta-5-steroid dehydrogenase, 3 beta- and steroid delta-isomerase 7"
151987	1.6163	10.37	2.6332	0.01539	0.14102	-3.2591	PPP4R2	protein phosphatase 4 regulatory subunit 2
158234	-1.3601	6.1734	-2.6331	0.015392	0.14102	-3.2593	TRMT10B	tRNA methyltransferase 10B
1371	-1.7001	7.2674	-2.6331	0.015395	0.14102	-3.2594	CPOX	coproporphyrinogen oxidase
10289	1.2491	12.658	2.6323	0.015421	0.14119	-3.2609	EIF1B	eukaryotic translation initiation factor 1B
100131023	1.4229	3.3795	2.6317	0.015443	0.1412	-3.2622	100131023	NA
90843	-1.5199	7.5776	-2.6315	0.015446	0.1412	-3.2624	TCEAL8	transcription elongation factor A like 8
6431	-1.3987	10.829	-2.6312	0.015459	0.1412	-3.2631	SRSF6	serine and arginine rich splicing factor 6
9814	-1.7837	10.427	-2.6312	0.015459	0.1412	-3.2632	SFI1	SFI1 centrin binding protein
822	1.8116	11.747	2.6311	0.015462	0.1412	-3.2633	CAPG	"capping actin protein, gelsolin like"
7705	-2.1573	6.4929	-2.6295	0.015517	0.14162	-3.2665	ZNF146	zinc finger protein 146
729582	-1.6713	2.6265	-2.6289	0.015537	0.14173	-3.2677	DIRC3	disrupted in renal carcinoma 3
23029	-1.2339	8.0896	-2.628	0.015568	0.14193	-3.2694	RBM34	RNA binding motif protein 34
8910	-1.5461	4.5797	-2.6262	0.015629	0.14242	-3.273	SGCE	sarcoglycan epsilon
51616	-1.741	5.3062	-2.6258	0.015645	0.14247	-3.2739	TAF9B	TATA-box binding protein associated factor 9b
10903	-2.2577	4.2841	-2.6255	0.015654	0.14247	-3.2744	MTMR11	myotubularin related protein 11
23042	-1.6123	8.4347	-2.6254	0.015659	0.14247	-3.2747	PDXDC1	pyridoxal dependent decarboxylase domain containing 1
81552	1.5734	12.484	2.6243	0.015694	0.14271	-3.2767	VOPP1	VOPP1 WW domain binding protein
7295	1.5339	15.699	2.623	0.015741	0.14306	-3.2794	TXN	thioredoxin
5550	-1.3472	7.2842	-2.622	0.015775	0.14329	-3.2813	PREP	prolyl endopeptidase
27039	1.3178	2.9387	2.6212	0.015803	0.14348	-3.2829	PKD2L2	"polycystin 2 like 2, transient receptor potential cation channel"
10194	-1.3055	8.8703	-2.6202	0.015837	0.14354	-3.2849	TSHZ1	teashirt zinc finger homeobox 1
1879	-1.619	3.2429	-2.62	0.015844	0.14354	-3.2853	EBF1	EBF transcription factor 1
353131	1.2302	13.272	2.62	0.015845	0.14354	-3.2853	LCE1A	late cornified envelope 1A
140807	-1.8017	4.9828	-2.62	0.015845	0.14354	-3.2853	KRT72	keratin 72
143884	-1.4942	7.8021	-2.6198	0.015851	0.14354	-3.2857	CWF19L2	CWF19 like cell cycle control factor 2
166815	-1.7651	5.4108	-2.6189	0.015883	0.14375	-3.2875	TIGD2	tigger transposable element derived 2
6193	-1.7789	14.315	-2.6186	0.015893	0.14376	-3.288	RPS5	ribosomal protein S5
84034	1.915	13.384	2.6174	0.015938	0.14404	-3.2906	EMILIN2	elastin microfibril interfacer 2
339451	-1.5077	8.3395	-2.6173	0.01594	0.14404	-3.2907	KLHL17	kelch like family member 17
6992	1.4511	10.433	2.617	0.015952	0.14407	-3.2914	PPP1R11	protein phosphatase 1 regulatory inhibitor subunit 11
9381	1.5584	12.792	2.6163	0.015975	0.1442	-3.2926	OTOF	otoferlin
11345	1.424	13.571	2.6159	0.01599	0.14427	-3.2935	GABARAPL2	GABA type A receptor associated protein like 2
8808	1.2925	6.9078	2.6147	0.016033	0.14458	-3.2959	IL1RL2	interleukin 1 receptor like 2
10654	-1.6906	7.7768	-2.6144	0.016043	0.1446	-3.2965	PMVK	phosphomevalonate kinase
51304	1.382	11.319	2.6141	0.016053	0.14461	-3.297	ZDHHC3	zinc finger DHHC-type palmitoyltransferase 3
54881	-1.3968	7.8979	-2.6137	0.016065	0.14465	-3.2977	TEX10	testis expressed 10
645700	-1.8707	4.0232	-2.6119	0.016131	0.14516	-3.3014	ZNF890P	"zinc finger protein 890, pseudogene"
8573	-1.8025	6.3977	-2.6111	0.016161	0.14531	-3.3031	CASK	calcium/calmodulin dependent serine protein kinase
56672	-1.6272	5.2138	-2.611	0.016164	0.14531	-3.3032	AKIP1	A-kinase interacting protein 1
64077	-1.4128	8.8264	-2.6107	0.016174	0.14532	-3.3038	LHPP	phospholysine phosphohistidine inorganic pyrophosphate phosphatase
23440	1.2387	6.4402	2.6096	0.016212	0.14558	-3.3059	OTP	orthopedia homeobox
8994	-1.605	6.5603	-2.6085	0.016252	0.14587	-3.3081	LIMD1	LIM domains containing 1
55876	-1.6754	9.2849	-2.6081	0.016266	0.14593	-3.3089	GSDMB	gasdermin B
143689	1.5236	8.8231	2.6076	0.016284	0.14597	-3.3099	PIWIL4	piwi like RNA-mediated gene silencing 4
167555	1.7069	6.5545	2.6075	0.016289	0.14597	-3.3102	FAM151B	family with sequence similarity 151 member B
133418	1.4435	13.096	2.6073	0.016297	0.14597	-3.3106	EMB	embigin
64343	1.1457	9.613	2.6067	0.016318	0.14608	-3.3117	AZI2	5-azacytidine induced 2
10397	1.3277	14.021	2.6064	0.016327	0.14609	-3.3122	NDRG1	N-myc downstream regulated 1
7804	-2.1974	4.4046	-2.6062	0.016335	0.14609	-3.3127	LRP8	LDL receptor related protein 8
84176	1.5519	3.0552	2.6057	0.016353	0.14617	-3.3137	MYH16	myosin heavy chain 16 pseudogene
100129125	2.0224	6.7779	2.6054	0.016362	0.14617	-3.3142	100129125	NA
79650	1.4905	13.958	2.6052	0.016369	0.14617	-3.3146	USB1	U6 snRNA biogenesis phosphodiesterase 1
81553	1.3887	13.115	2.6045	0.016395	0.14632	-3.316	CYRIA	CYFIP related Rac1 interactor A
55332	1.6174	11.426	2.6041	0.016409	0.14638	-3.3168	DRAM1	DNA damage regulated autophagy modulator 1
22981	-1.8484	3.9896	-2.6035	0.016432	0.14649	-3.318	NINL	ninein like
3816	-1.7933	5.0343	-2.6032	0.016442	0.14649	-3.3185	KLK1	kallikrein 1
645431	-1.6411	3.2837	-2.6031	0.016448	0.14649	-3.3188	FUT8-AS1	FUT8 antisense RNA 1
2067	-1.553	7.8527	-2.6028	0.016458	0.14651	-3.3194	ERCC1	"ERCC excision repair 1, endonuclease non-catalytic subunit"
57820	-1.2349	8.4496	-2.6017	0.016499	0.14679	-3.3216	CCNB1IP1	cyclin B1 interacting protein 1
25824	1.4586	14.215	2.5984	0.016619	0.14779	-3.3282	PRDX5	peroxiredoxin 5
5021	-1.6187	3.6135	-2.598	0.016631	0.14783	-3.3288	OXTR	oxytocin receptor
51119	-1.1573	8.559	-2.5972	0.016662	0.14802	-3.3304	SBDS	SBDS ribosome maturation factor
728147	-1.3588	3.7483	-2.5954	0.016726	0.14851	-3.3339	728147	NA
100302691	1.7252	7.8739	2.5933	0.016804	0.14904	-3.3381	LINC00184	long intergenic non-protein coding RNA 184
5378	-1.4609	6.2751	-2.5933	0.016806	0.14904	-3.3382	PMS1	"PMS1 homolog 1, mismatch repair system component"
25873	-1.6678	12.771	-2.5931	0.016811	0.14904	-3.3385	RPL36	ribosomal protein L36
5476	1.4983	13.664	2.5926	0.01683	0.14904	-3.3395	CTSA	cathepsin A
2268	1.3502	17.665	2.5925	0.016834	0.14904	-3.3397	FGR	"FGR proto-oncogene, Src family tyrosine kinase"
65078	-1.2758	5.1638	-2.5923	0.016843	0.14904	-3.3402	RTN4R	reticulon 4 receptor
8832	-1.6903	6.588	-2.592	0.016852	0.14904	-3.3406	CD84	CD84 molecule
10501	1.3386	7.4765	2.592	0.016854	0.14904	-3.3407	SEMA6B	semaphorin 6B
4907	-1.3248	3.9596	-2.5916	0.016868	0.14909	-3.3415	NT5E	5'-nucleotidase ecto
5519	-1.4079	5.8927	-2.5906	0.016905	0.14934	-3.3435	PPP2R1B	protein phosphatase 2 scaffold subunit Abeta
100506229	2.6931	8.1329	2.59	0.016928	0.14947	-3.3447	LINC01093	long intergenic non-protein coding RNA 1093
730394	1.3779	11.986	2.589	0.016963	0.14966	-3.3465	730394	NA
84816	-1.5565	5.9119	-2.5889	0.016968	0.14966	-3.3468	RTN4IP1	reticulon 4 interacting protein 1
219743	-1.5693	5.6708	-2.5887	0.016976	0.14966	-3.3472	TYSND1	trypsin domain containing 1
83939	-1.2307	7.1119	-2.587	0.01704	0.15015	-3.3506	EIF2A	eukaryotic translation initiation factor 2A
4166	1.2888	10.665	2.5865	0.017058	0.15024	-3.3516	CHST6	carbohydrate sulfotransferase 6
28990	-1.4305	6.7796	-2.5857	0.017087	0.15041	-3.3531	ASTE1	asteroid homolog 1
6474	1.2217	6.4106	2.585	0.017115	0.15058	-3.3545	SHOX2	short stature homeobox 2
345611	-1.3885	4.2734	-2.5847	0.017127	0.15061	-3.3552	IRGM	immunity related GTPase M
5657	1.4234	7.2617	2.5843	0.017141	0.15061	-3.3559	PRTN3	proteinase 3
9538	-1.5872	6.4898	-2.5842	0.017144	0.15061	-3.356	EI24	EI24 autophagy associated transmembrane protein
8697	-1.373	6.8414	-2.5834	0.017175	0.1508	-3.3577	CDC23	cell division cycle 23
286161	-1.7079	6.2781	-2.5824	0.017214	0.15092	-3.3597	286161	NA
8045	-1.3053	6.54	-2.5823	0.017217	0.15092	-3.3598	RASSF7	Ras association domain family member 7
55160	-2.0941	6.5727	-2.5823	0.017218	0.15092	-3.3599	ARHGEF10L	Rho guanine nucleotide exchange factor 10 like
66008	-1.567	7.6482	-2.5821	0.017223	0.15092	-3.3602	TRAK2	trafficking kinesin protein 2
638	1.4979	9.2714	2.5816	0.017242	0.151	-3.3611	BIK	BCL2 interacting killer
8692	1.6094	12.506	2.581	0.017265	0.15113	-3.3624	HYAL2	hyaluronidase 2
7045	-2.4976	9.7236	-2.5806	0.017279	0.15118	-3.3631	TGFBI	transforming growth factor beta induced
2768	-1.5279	6.7464	-2.5795	0.017322	0.15148	-3.3653	GNA12	G protein subunit alpha 12
374986	-1.4087	6.7248	-2.5786	0.017356	0.15162	-3.3671	MIGA1	mitoguardin 1
1950	-1.4343	4.9051	-2.5786	0.017356	0.15162	-3.3671	EGF	epidermal growth factor
114836	-1.8406	5.2761	-2.5776	0.017396	0.15186	-3.3692	SLAMF6	SLAM family member 6
136051	-1.3199	6.3392	-2.5771	0.017413	0.15186	-3.37	ZNF786	zinc finger protein 786
23643	1.622	15.14	2.5771	0.017413	0.15186	-3.37	LY96	lymphocyte antigen 96
23301	-1.3643	5.346	-2.5768	0.017425	0.15186	-3.3707	EHBP1	EH domain binding protein 1
267010	1.5557	9.8252	2.5767	0.01743	0.15186	-3.3709	RNU12	"RNA, U12 small nuclear"
10610	2.013	11.503	2.5765	0.017435	0.15186	-3.3712	ST6GALNAC2	"ST6 N-acetylgalactosaminide alpha-2,6-sialyltransferase 2"
9830	-1.3449	7.4273	-2.5752	0.017485	0.1521	-3.3737	TRIM14	tripartite motif containing 14
63917	-1.287	6.3299	-2.575	0.017493	0.1521	-3.3741	GALNT11	polypeptide N-acetylgalactosaminyltransferase 11
10220	-1.27	5.4752	-2.5748	0.017501	0.1521	-3.3745	GDF11	growth differentiation factor 11
57188	2.3792	8.1521	2.5748	0.017503	0.1521	-3.3746	ADAMTSL3	ADAMTS like 3
55646	-1.5784	9.3989	-2.5747	0.017507	0.1521	-3.3748	LYAR	Ly1 antibody reactive
677827	1.5888	9.3096	2.5742	0.017526	0.15213	-3.3758	SNORA46	"small nucleolar RNA, H/ACA box 46"
6404	1.4841	13.521	2.5741	0.017529	0.15213	-3.376	SELPLG	selectin P ligand
[truncated: 15,351 more rows]

## Sheet: logFC
Symbols	logFC
FCER1A	-6.0881
CAVIN2	-5.6224
EOMES	-5.3161
GZMK	-5.2939
TUBB1	-5.1816
DPP4	-5.1775
RORA	-5.1307
ITK	-5.0285
WDR86-AS1	-4.8982
CD5	-4.8768
FAM102A	-4.8637
IL7R	-4.8055
CCL5	-4.7932
CD3G	-4.7705
NELL2	-4.7433
FGFBP2	-4.7427
CD96	-4.7389
FAM153CP	-4.731
PRKAR2B	-4.7157
TRAT1	-4.6994
KLRB1	-4.6874
PLEKHA1	-4.6722
XCL1	-4.6538
GNG11	-4.6187
LEF1	-4.6124
TC2N	-4.5999
LINC00892	-4.5941
THEMIS	-4.594
TNFRSF25	-4.591
KIF5C	-4.5776
MYBL1	-4.575
GNLY	-4.5671
CXCR2P1	-4.5435
SBK1	-4.536
RBPMS2	-4.4868
GZMA	-4.4832
ADGRG1	-4.4817
MAP3K7CL	-4.4783
CD247	-4.4763
ZNF831	-4.4592
PF4V1	-4.4109
FBXL16	-4.3838
KLRK1	-4.3836
CD6	-4.3811
SAMD3	-4.3627
SKAP1	-4.3542
KLRG1	-4.3494
PYHIN1	-4.3311
FAM153B	-4.3269
RORC	-4.3059
IL2RB	-4.3004
GZMH	-4.2836
LDLRAP1	-4.2699
ZNF204P	-4.2505
GNAZ	-4.2408
ITM2A	-4.2343
PRKCQ	-4.2271
PPBP	-4.2263
TCF7	-4.21
C2orf88	-4.133
MAL	-4.0922
DLG3	-4.088
TBC1D4	-4.0599
DENND11	-4.0486
B3GAT1	-4.0459
ELOVL7	-4.0388
HABP4	-4.0295
ITPR3	-4.0085
IL4	-4.0023
CD2	-4.0009
PRKACB	-3.9919
HOXB2	-3.9823
PLXNA1	-3.9545
SRSF8	-3.9282
RSAD2	-3.9275
KLF12	-3.926
PTCRA	-3.9155
CCDC65	-3.9126
CD40LG	-3.9006
SNORD64	-3.8991
TBX21	-3.8913
KLRF1	-3.8721
ZAP70	-3.8693
JAKMIP1	-3.8588
RFTN1	-3.8524
NIPA1	-3.8498
RTL6	-3.8429
NR3C2	-3.8211
PRKCQ-AS1	-3.8022
KLRC3	-3.7949
BCL11B	-3.7864
IGFBP3	-3.7834
SEPTIN11	-3.7791
S1PR5	-3.7734
HRAT92	-3.7642
CAMK4	-3.7623
ADCY9	-3.7492
ZXDB	-3.7465
IFNG	-3.7404
STK39	-3.739
GPRASP1	-3.7164
LDHB	-3.7077
ZNHIT6	-3.6988
MMD	-3.6935
LRATD2	-3.6751
KLHL3	-3.6637
MDFIC	-3.6564
GATA3	-3.6404
SEPTIN1	-3.6369
PI16	-3.6368
ANKH	-3.6267
OXCT1	-3.6228
IKZF3	-3.6164
ITGB3	-3.61
GREM2	-3.6075
LY6G6F	-3.603
CD69	-3.6011
ERAP2	-3.5983
CCR7	-3.5947
NRGN	-3.5758
PF4	-3.565
GPA33	-3.5597
MLH3	-3.5461
SPON2	-3.545
TLE5	-3.5402
MCUB	-3.5384
TIAM1	-3.5335
TSPYL2	-3.5301
SYTL2	-3.5295
ABHD14B	-3.5276
ZNF286B	-3.5216
RRS1	-3.5195
SLC45A3	-3.516
BEX3	-3.5145
TRUB1	-3.5108
LAIR2	-3.4977
MID2	-3.491
KLRD1	-3.4612
DNM3	-3.4589
ZNF783	-3.4535
SPX	-3.44
ALOX12	-3.4362
LDOC1	-3.4352
ZNF664	-3.4187
RGS1	-3.414
TGFBR3	-3.412
HLA-DQA1	-3.4099
C3orf18	-3.4018
SOCS2	-3.4004
CTTN	-3.4002
OSBPL3	-3.3822
DHRS3	-3.3757
C12orf75	-3.373
FAM169A	-3.3638
CTSW	-3.3584
HEG1	-3.3546
SNURF	-3.3526
DYRK2	-3.3478
TULP4	-3.3451
RNF144A	-3.328
PARP15	-3.3262
PVRIG	-3.304
PRKX	-3.3023
GPR183	-3.2937
PTPN13	-3.2925
CD3D	-3.2868
100129399	-3.2856
ZNF573	-3.277
WDR11-AS1	-3.2737
HLA-DPB1	-3.2736
SMPD3	-3.2735
PTGDS	-3.2727
FBXO32	-3.2697
CEP78	-3.2635
RIMBP3	-3.2634
TAL1	-3.2594
TARS3	-3.2577
MORC4	-3.2481
ATIC	-3.2478
GIMAP7	-3.2465
ENKUR	-3.2461
PLCG1	-3.2433
ENO2	-3.2431
GATA2	-3.2397
PTGDR2	-3.2331
RADX	-3.2293
RCAN3	-3.2266
CXCR5	-3.225
CRTAM	-3.2229
FYN	-3.2223
NPIPA1	-3.2205
SLC4A4	-3.2118
XAF1	-3.2011
RPTOR	-3.1998
PLEKHB1	-3.1989
ANO8	-3.1841
ICOS	-3.1835
TCEA3	-3.1762
RASGRP1	-3.173
WASF3	-3.1716
PIK3C2B	-3.1702
GPR68	-3.1687
COQ10A	-3.1653
GZMB	-3.1638
CBR3	-3.1635
LAG3	-3.1618
PITPNM2	-3.1586
PLEKHA8	-3.1554
ZNF683	-3.1457
TRAP1	-3.1404
SH3BGRL2	-3.1399
CCL28	-3.1393
SLC41A1	-3.1382
PTER	-3.1315
SPN	-3.1298
MIR4697HG	-3.1243
CYP4V2	-3.1155
SCGB1C1	-3.1126
TRPC1	-3.1107
PTPRCAP	-3.1088
TRAF5	-3.1055
CTLA4	-3.1038
AHNAK	-3.1029
MTSS1	-3.0988
DNMT1	-3.0985
IFIT1	-3.0945
MTR	-3.0897
C1orf21	-3.0875
A2M-AS1	-3.0873
MBNL2	-3.0814
CACNG6	-3.0793
PTPN4	-3.0748
MSX2P1	-3.0742
SPINK2	-3.0725
ARHGAP10	-3.068
SYNM	-3.0652
CLSTN1	-3.0641
ITGB7	-3.0633
EVL	-3.0564
KLRC1	-3.0564
338620	-3.054
SLC25A38	-3.0533
MATK	-3.0483
NDFIP2	-3.0453
CMKLR1	-3.0427
BDH1	-3.0395
BTBD11	-3.0386
F13A1	-3.0378
PBX1	-3.0342
UBASH3A	-3.03
ABI2	-3.0204
TAMM41	-3.0106
HSPH1	-3.0106
TPPP	-3.0091
HHAT	-3.006
HDC	-3.0056
HSPB1	-3.0048
CALD1	-3.0039
PASK	-3.0017
GNB5	-3.0015
GPHN	-2.9946
MYLK	-2.99
ECI2	-2.9874
LRFN3	-2.9848
CRIP2	-2.9733
SH2D1A	-2.9731
TARBP1	-2.97
PTPRM	-2.969
ENOSF1	-2.9687
KCTD15	-2.9663
GRAP2	-2.9645
HEMGN	-2.951
NOB1	-2.9498
GAS2L1P2	-2.9424
THEM6	-2.9383
CFAP97	-2.9365
FAM81B	-2.9358
LGALS2	-2.9357
ADAMTS10	-2.933
LAX1	-2.9255
ZNF30	-2.924
THEM4	-2.924
GPR174	-2.9204
RHOBTB3	-2.9197
OSGEPL1	-2.9188
JAM3	-2.9175
ALOX15P1	-2.9158
ZFP1	-2.91
NT5M	-2.9083
100130938	-2.9064
B4GAT1	-2.9049
PKN3	-2.9047
ZNF32	-2.9019
LIMA1	-2.8998
TRIT1	-2.8993
BCL7A	-2.898
NMT2	-2.8927
INPP4B	-2.8912
GIPC1	-2.8889
BACH2	-2.8873
WDR54	-2.8873
CASP17P	-2.8832
NAP1L3	-2.8827
TRUB2	-2.8804
CLIP4	-2.8801
RRP1B	-2.8782
RTTN	-2.874
BFSP1	-2.8729
100129637	-2.8693
JAKMIP2	-2.8668
FLT3LG	-2.8646
TTC3	-2.8633
FAAH2	-2.863
CAPN2	-2.8579
XPO4	-2.8442
MEIS1	-2.8423
URI1	-2.8422
EPHX2	-2.8394
LRPPRC	-2.8382
NDUFAF4	-2.8381
USP46	-2.8374
ABCC3	-2.8351
NSMCE3	-2.8318
FBL	-2.8289
PRSS23	-2.8247
TXK	-2.8197
SIDT1	-2.8196
CLIC3	-2.8195
PWAR6	-2.8185
IFFO2	-2.8163
UNG	-2.8156
RECK	-2.814
LOC728743	-2.8126
MAP4K5	-2.8047
SCFD2	-2.7995
CBLB	-2.7969
PBX4	-2.7942
WDR75	-2.7937
DDX10	-2.7885
HERC6	-2.7878
ACSL6	-2.7874
246734	-2.7849
PEPD	-2.7841
ASAP2	-2.7802
PP7080	-2.7782
SNORD11	-2.7746
ZNF22	-2.7746
TTC27	-2.7716
CD8B	-2.7677
RNF125	-2.7509
PON2	-2.7465
ARHGAP6	-2.7421
PACS2	-2.7421
SIT1	-2.7401
SNX25	-2.7322
FASLG	-2.7322
PWARSN	-2.7311
ZNF571	-2.7304
TYW3	-2.7219
POGLUT3	-2.7181
MNAT1	-2.7178
GGA2	-2.7168
HERC5	-2.7167
HLA-DMB	-2.7162
OPTN	-2.7143
SLC7A1	-2.7132
LRBA	-2.7097
ANO6	-2.705
CMPK2	-2.6976
LBH	-2.6955
ALDH5A1	-2.6946
HLA-DQA2	-2.6933
RUNX3	-2.6931
LAMP3	-2.6923
ST6GALNAC6	-2.6861
MRTO4	-2.6855
NBDY	-2.6794
TTC39B	-2.6746
PEBP1	-2.6694
MYC	-2.6689
TCF3	-2.6623
ZNF121	-2.6615
LPAR5	-2.6607
PCNX2	-2.6584
P3H4	-2.6566
ABHD15	-2.6534
GVINP1	-2.6524
IPO9	-2.6476
KIAA1324L	-2.6461
PRKCA	-2.6448
PPP3CC	-2.642
IFI44	-2.6405
NUP210	-2.6371
PHLPP2	-2.6359
ZNF354B	-2.6328
CLDN5	-2.6238
TRIM58	-2.6205
CLNS1A	-2.616
FGF8	-2.6151
TMEM204	-2.6134
FUT8	-2.6117
APOL3	-2.6109
CDC25B	-2.6099
SGCB	-2.6079
ATP10A	-2.6076
CRYZ	-2.6073
SPON1	-2.6069
C20orf194	-2.6034
THOC1	-2.6032
CXCR6	-2.6026
BANK1	-2.6015
GP6	-2.598
RPL27A	-2.5975
ZDHHC21	-2.5951
286058	-2.5929
HACD3	-2.5923
GCOM1	-2.591
CDK6	-2.589
3126	-2.5838
CD8A	-2.5807
TMEM263	-2.5797
TMEM156	-2.5784
MRPS9	-2.5773
LIPC	-2.577
PRF1	-2.5754
COLQ	-2.5734
IGIP	-2.5732
BEX5	-2.5696
CMSS1	-2.5692
BACE2	-2.5684
C12orf57	-2.5629
OTUD3	-2.5599
VANGL1	-2.5553
SLAIN1	-2.5521
ATXN10	-2.5504
HERC2P2	-2.5493
HLA-DRB5	-2.5443
CCDC180	-2.5426
HMG20A	-2.541
RPL22	-2.5371
MSH2	-2.5366
TMEM109	-2.5318
ATP6V0E2	-2.5311
ANKS6	-2.5311
PACC1	-2.5291
PANX1	-2.5283
TRMT11	-2.5279
AP3M2	-2.5276
PLXNA3	-2.5258
EGFL8	-2.5232
CRYBG3	-2.5204
WEE1	-2.515
RDH14	-2.5148
EEF2K	-2.5135
SLC35B4	-2.513
ABHD14A	-2.5107
ST6GAL1	-2.508
TIGIT	-2.5073
KCNA3	-2.5061
GRB14	-2.506
TAF1B	-2.5037
ST3GAL5	-2.5031
XK	-2.5029
CENPK	-2.5028
RLN2	-2.5025
TLE2	-2.4983
TGFBI	-2.4976
IFI44L	-2.4959
PPM1K	-2.4944
TREML1	-2.4944
BCL2	-2.491
LINC00926	-2.4909
CYB561	-2.4895
PLAAT1	-2.4892
ZBTB39	-2.4883
AGK	-2.4879
PRXL2C	-2.4878
MAF	-2.485
ENOPH1	-2.4848
SSBP4	-2.484
CD99	-2.4812
AKR1B1	-2.4803
BAG3	-2.4799
REXO4	-2.479
ZNF251	-2.4779
LANCL1	-2.4761
IL23A	-2.476
SELENOM	-2.4715
OSBPL7	-2.4705
SOGA3	-2.4702
RRAS2	-2.4651
CALHM2	-2.4631
NCBP2	-2.4608
CACNA2D2	-2.4563
NR1D2	-2.4559
CMTM5	-2.454
PDCD2L	-2.4517
ABCB1	-2.4508
PTGES3L-AARSD1	-2.4488
CCDC6	-2.4404
CUZD1	-2.44
IL27RA	-2.4386
TMEM267	-2.4366
PNPT1	-2.4365
MAP9	-2.4356
LIPA	-2.4339
POP5	-2.4337
SUN1	-2.4326
CHN1	-2.4325
MPP6	-2.4318
KIF21A	-2.4287
BLK	-2.4266
SSRP1	-2.4261
ASB2	-2.4256
MCCC1	-2.422
MLC1	-2.4215
ANKRD36	-2.4211
HLF	-2.4206
CD81	-2.4206
GUCY1B1	-2.4204
ALMS1	-2.4191
FAM210A	-2.4189
TTC7B	-2.4185
WDR36	-2.4155
THUMPD2	-2.4148
SMAD3	-2.4109
NOC3L	-2.4076
LRP12	-2.4071
CD160	-2.4069
LTV1	-2.4064
IL32	-2.3994
MMRN1	-2.3994
GALNT12	-2.3974
ZNF165	-2.3974
TOMM70	-2.3971
ZNF395	-2.397
RAB15	-2.3968
TSKS	-2.3957
P2RY10	-2.394
KLRC4	-2.392
SLC4A7	-2.3905
LTBP1	-2.3883
SH2D1B	-2.3872
RNF43	-2.3861
NUBPL	-2.3859
ZNF540	-2.3854
NOP53	-2.3845
GNGT2	-2.381
ZBTB4	-2.3801
MTFP1	-2.378
DNAJC24	-2.3776
KLHL42	-2.3736
DPYSL2	-2.3713
APOBEC3C	-2.3687
THG1L	-2.3623
UBE2Q2	-2.3612
GP9	-2.3611
NUP88	-2.3598
GSPT2	-2.3597
100507486	-2.3592
ZNF618	-2.3591
NUP205	-2.3586
LINC00944	-2.3562
HGD	-2.351
PDCD6IPP2	-2.3506
GPD1L	-2.3504
MLLT3	-2.3491
TPPP3	-2.3462
ABCA3	-2.3458
RIC8B	-2.3451
HLA-DPA1	-2.3447
ADA	-2.3444
WDR89	-2.3442
CAPN5	-2.337
SMYD4	-2.3339
HLTF	-2.3328
METRN	-2.3314
POLR1A	-2.331
CNN1	-2.3305
BIVM	-2.3257
NTN4	-2.3243
FAXDC2	-2.3232
DCLRE1A	-2.3219
NAP1L2	-2.3208
FCRL3	-2.3208
HPCAL4	-2.3183
PHF10	-2.3181
SPECC1	-2.3181
ZNF84	-2.3175
TRIM32	-2.3164
348035	-2.3146
DOK7	-2.3146
ZC4H2	-2.3131
DOK2	-2.3116
MTLN	-2.3107
MCOLN2	-2.3103
CTSF	-2.3096
PRAG1	-2.3054
NPRL3	-2.3049
ALG9	-2.3046
VARS2	-2.3038
NMUR1	-2.3018
RIC3	-2.301
ZNF559	-2.2994
PREPL	-2.2968
ICAM2	-2.2965
KCNJ14	-2.2963
NCAM1	-2.2959
TBC1D19	-2.2948
IRF8	-2.2933
PRMT6	-2.291
SCRN1	-2.2907
THSD1	-2.2894
NUDT9P1	-2.2891
TSPAN3	-2.2891
MYZAP	-2.2889
ITPRIPL1	-2.2878
AGPAT5	-2.2877
TNNC2	-2.2863
ECRG4	-2.2852
SELENOI	-2.2819
CD2AP	-2.2809
ZNF548	-2.2797
TCERG1	-2.2771
ACAD11	-2.277
NENF	-2.2754
ACSF2	-2.2752
NXPH4	-2.275
RGS9	-2.2742
ZNF23	-2.273
FAM83D	-2.2711
MMAB	-2.2699
SNORD4A	-2.2682
CYB5B	-2.2669
DCTD	-2.2664
RAB27B	-2.2633
DCAF4	-2.26
MTMR11	-2.2577
FGD6	-2.2564
ZFYVE28	-2.2536
PLA2G12A	-2.251
FASTKD2	-2.2496
TSHZ2	-2.2481
TBC1D24	-2.2474
ZNF528	-2.2429
CCDC92	-2.2425
SLC29A1	-2.2415
ISG15	-2.24
BMI1	-2.2359
ZDHHC14	-2.2342
S100B	-2.234
ARMCX5	-2.2331
BLNK	-2.2328
MRPS35	-2.2312
BIN1	-2.2299
ZNF542P	-2.2298
KIAA0408	-2.2291
ATF7IP2	-2.229
SMYD2	-2.228
SPOCK2	-2.2276
GIMAP5	-2.2268
RPL10A	-2.2261
SRPRB	-2.225
B3GLCT	-2.2236
TNFRSF4	-2.2187
PCCA	-2.2178
ZDBF2	-2.2119
729860	-2.2105
AKT3	-2.2077
FBXO41	-2.2077
SMARCAD1	-2.2033
TSPAN5	-2.2016
RPSAP58	-2.2011
FAM234B	-2.2009
RPSAP52	-2.2004
CD28	-2.1974
LRP8	-2.1974
LPAR6	-2.1954
CCND2	-2.195
ACRBP	-2.1943
SLC38A1	-2.1925
CCDC25	-2.1914
C15orf61	-2.1905
ANK3	-2.1904
NF2	-2.1881
EIF2D	-2.1875
MYO1D	-2.1857
NCKAP1	-2.184
CCR5	-2.1837
MRI1	-2.1828
HIP1R	-2.1813
TRAM2	-2.1784
RGS10	-2.1777
NOP58	-2.1762
FAN1	-2.1755
AQP3	-2.1733
DMRTC1	-2.1722
MS4A1	-2.1716
CYB5A	-2.1712
KPNA5	-2.1701
DIS3L	-2.1691
HLA-DRA	-2.169
CCDC102A	-2.1689
DCP1B	-2.1686
PLEKHG4	-2.1679
PACSIN1	-2.1679
FBXO21	-2.1676
RIN2	-2.1671
MRPL1	-2.1666
KIF28P	-2.1655
TMEM30B	-2.1637
PLXND1	-2.1611
EPHA4	-2.1589
100130428	-2.1588
CD52	-2.1585
RRN3	-2.1576
WDR3	-2.1573
ZNF146	-2.1573
SNHG20	-2.1522
ZNF793	-2.1521
MYCT1	-2.1517
ABHD12	-2.1493
SLC25A43	-2.1483
RPSAP9	-2.1482
LOC100131289	-2.1466
ABLIM1	-2.1459
ETS1	-2.1459
PRSS30P	-2.1431
LMNB2	-2.1431
SLFN13	-2.1428
C12orf45	-2.1426
COA4	-2.1391
ZC3H7B	-2.1384
APRT	-2.1375
INTS7	-2.1372
STAT4	-2.1352
NAP1L5	-2.1331
ADCK2	-2.1328
IPO5	-2.1317
POLR1C	-2.1314
PLEKHA5	-2.1305
TPCN1	-2.1297
RCC2	-2.1296
GPR171	-2.1294
TRIB2	-2.1267
RRP15	-2.125
NR2C1	-2.125
RPLP0	-2.124
NAA25	-2.1228
PDLIM1	-2.1207
IL5RA	-2.1207
VEZT	-2.1194
MRPL3	-2.1179
FAM117B	-2.1172
DLG5	-2.1168
MRPS27	-2.1164
CKAP5	-2.1159
NEXN	-2.1151
MBLAC2	-2.114
POLR3E	-2.1136
NEFL	-2.1121
PJA1	-2.1114
PET117	-2.1104
LMTK3	-2.1072
IRAK1BP1	-2.1046
EPRS1	-2.1045
TRG-AS1	-2.1036
ANO9	-2.1035
NAP1L1	-2.1028
OXNAD1	-2.1003
DNAJC6	-2.0997
ABCB4	-2.0997
RPS6KA5	-2.0975
WDCP	-2.095
DHODH	-2.0945
FANCC	-2.0944
ARHGEF10L	-2.0941
BMPR1A	-2.0923
SP140L	-2.0914
NR2F6	-2.0906
PPARGC1B	-2.0903
LINC02085	-2.0903
RGCC	-2.0896
HACD2	-2.0887
284630	-2.0862
DUSP5	-2.0862
BEX2	-2.0852
PARP12	-2.0849
DOCK10	-2.0845
PDIK1L	-2.0838
TMEM245	-2.0833
AARS2	-2.0831
SPOCD1	-2.0831
ADGRE4P	-2.0829
GALNT6	-2.0801
ZNF529	-2.0798
PRMT7	-2.0791
DMTN	-2.0789
SYNJ2BP	-2.0785
DIPK1A	-2.0779
TBC1D31	-2.0758
SERGEF	-2.0749
TSC22D1	-2.0743
ITGA4	-2.0723
IKZF2	-2.0714
ABLIM3	-2.0682
CTDSPL	-2.0677
ZNF551	-2.0676
MTAP	-2.0662
FAM3C	-2.0659
SERPINH1	-2.0653
TWISTNB	-2.0643
ESYT1	-2.0621
ZNF337	-2.0609
79904	-2.059
RSAD1	-2.0582
BEND5	-2.0571
XYLT1	-2.0562
ZSCAN26	-2.056
CRY1	-2.0558
AFG3L2	-2.0557
PCYOX1	-2.055
SPIN2B	-2.0547
SACS	-2.0536
CCDC107	-2.0526
MPHOSPH6	-2.0523
KAT14	-2.0519
MRPL9	-2.0513
APBA2	-2.0489
RHOBTB1	-2.0489
GPR19	-2.0485
CA5B	-2.0472
HES4	-2.0468
AKAP11	-2.0457
HADH	-2.0441
NFE2L3	-2.0432
CXXC5	-2.0428
UGDH	-2.0423
SMOX	-2.0415
ZNF175	-2.0366
TRIM59	-2.0323
HAPLN3	-2.031
QDPR	-2.0306
RASGRP3	-2.0294
TCTN3	-2.0291
TXLNG	-2.0278
RPF2	-2.0273
HSP90AB1	-2.0263
ZCCHC4	-2.0259
LOC653160	-2.0234
259291	-2.023
TRMT61B	-2.0195
TTC39C	-2.0189
NIPAL3	-2.0189
AKAP1	-2.0185
LLGL2	-2.0175
IFIT5	-2.0175
ZNF404	-2.0142
TREX1	-2.0125
C10orf143	-2.0112
NEK3	-2.0102
CACNB4	-2.0089
KIFAP3	-2.0072
GTF2H3	-2.0071
POGLUT1	-2.0067
CATSPER2	-2.0063
TUBGCP5	-2.0054
NAA15	-2.0037
SNHG1	-2.0032
PLXNB2	-2.0021
MCPH1	-2.0014
POLR1E	-2.0004
IARS1	-2.0002
TTC37	-1.9999
CROCC	-1.9986
FCGBP	-1.9984
PRR5L	-1.9982
HEATR9	-1.9966
100506548	-1.9963
PID1	-1.9958
PIGP	-1.9948
PARD6G	-1.9926
PHLDB3	-1.9916
NID1	-1.9914
DHX33	-1.9908
SH3PXD2A	-1.9904
ZFP82	-1.9898
GSE1	-1.9893
GPATCH4	-1.9888
MORC2	-1.9876
SNORD19	-1.9868
PABPC4	-1.9856
LDAH	-1.9848
UBXN2A	-1.9827
IL12RB2	-1.9827
MAGEF1	-1.9814
TRABD2A	-1.9809
TMOD1	-1.9806
DPY19L1	-1.9765
DCHS1	-1.9724
CIITA	-1.9701
PTGIR	-1.9692
LINC00426	-1.9691
CD79B	-1.9685
KCNN4	-1.9671
CYP2U1	-1.967
LRRN3	-1.9655
PRKAB2	-1.9653
100507209	-1.9645
PAK1IP1	-1.9637
TMTC4	-1.9628
GCLC	-1.9625
PPT2	-1.9615
TMEM268	-1.9607
EXOSC5	-1.9592
WARS2	-1.9588
PEAR1	-1.9577
MTHFD1	-1.9571
ODC1	-1.9564
ZC2HC1A	-1.9563
GCN1	-1.956
PPRC1	-1.9556
RPL4	-1.9553
URB2	-1.9552
ADARB1	-1.9537
PHF14	-1.9535
UST	-1.9532
GNPDA2	-1.9526
AGFG2	-1.9492
HLA-DRB1	-1.9484
ZNF37BP	-1.9483
SSR4P1	-1.9476
WDR43	-1.9459
PURA	-1.9456
ETAA1	-1.9446
NOM1	-1.9444
ZBTB41	-1.9441
PARD3	-1.9423
RUFY3	-1.9414
ADO	-1.94
CHID1	-1.9398
ACP1	-1.9393
OSBPL5	-1.9366
GOLIM4	-1.9351
ADH5	-1.9343
POU6F1	-1.9335
SLC25A23	-1.9333
NME1	-1.9323
NUP160	-1.9309
ECHDC2	-1.9305
DTHD1	-1.9303
TLR3	-1.9302
DDHD2	-1.9294
RAB11FIP3	-1.9294
ITM2C	-1.9282
RCN1	-1.9273
EXOSC9	-1.9265
BMERB1	-1.9264
ACVR1C	-1.9264
PGAP3	-1.9259
AUTS2	-1.9253
NT5C3B	-1.9232
GGACT	-1.9228
DMAC1	-1.9218
ANKS3	-1.9216
CMPK1	-1.9213
POLRMT	-1.9209
BTN3A2	-1.9207
AGAP9	-1.9188
IL2RA	-1.9177
ZCCHC24	-1.9167
P2RY12	-1.9162
DUS3L	-1.9157
EIF3E	-1.9119
PARP14	-1.9109
ZNF14	-1.9106
RRN3P1	-1.9102
TIMM13	-1.91
ZFP90	-1.9093
E2F5	-1.9077
ARL14EP	-1.9073
CLEC1B	-1.9067
CAMK2D	-1.9051
HNRNPA1	-1.9042
MRPL19	-1.9034
ZBTB42	-1.9031
NCR3	-1.9031
TOP1MT	-1.9014
DNAJA3	-1.9012
RPL18A	-1.9004
WWP1	-1.9003
RPA1	-1.9002
TLR7	-1.899
ABCC4	-1.8986
B3GALNT2	-1.8955
SNRPD2	-1.8947
GNPNAT1	-1.8926
CD244	-1.8904
RFXAP	-1.8901
BRIX1	-1.8898
PUM3	-1.8896
LY9	-1.8891
ITGB5	-1.889
SYNJ2BP-COX16	-1.8883
KMT2A	-1.8874
MAGED1	-1.8848
LOC285097	-1.8836
ELP1	-1.8829
ZMYND11	-1.8828
LRRC8C	-1.8783
PEX3	-1.8779
DPH2	-1.8775
LEFTY1	-1.8774
OAS2	-1.8762
CCT2	-1.8761
UTP20	-1.8757
PCBP4	-1.8739
CDK4	-1.8728
C22orf34	-1.8709
ZNF890P	-1.8707
AHR	-1.8694
FAM98B	-1.8667
CD109	-1.8666
F2R	-1.8664
CCDC152	-1.8659
CHD6	-1.8648
CASD1	-1.8647
LRRC56	-1.864
INTS2	-1.8628
EIF5B	-1.8625
ERI3	-1.8623
PHF6	-1.8604
MICOS10-NBL1	-1.8602
EXOSC8	-1.8582
MB21D2	-1.8576
LEF1-AS1	-1.8573
ZNF347	-1.8572
PRTFDC1	-1.8568
TMPO	-1.8551
PVALB	-1.8519
AFAP1	-1.851
TRIM65	-1.8501
ZC3H12B	-1.8501
RPS4X	-1.8489
USP14	-1.8488
NINL	-1.8484
HSF2	-1.8476
FUOM	-1.846
CDK10	-1.8445
ATP8B2	-1.8441
RABGAP1L	-1.8431
ARMCX2	-1.842
CEP41	-1.8412
ZDHHC11	-1.8409
SLAMF6	-1.8406
ESYT2	-1.8404
IGHV7-81	-1.8378
NUDT15	-1.8377
CMTM8	-1.837
DNAJC15	-1.8366
NCAPD3	-1.8348
TMEM25	-1.8344
MCF2L-AS1	-1.8327
NPDC1	-1.8324
ITGA6	-1.8323
RPL3	-1.8304
NR4A1	-1.8292
CCDC14	-1.8264
NME2	-1.8262
PEA15	-1.8253
VSIG1	-1.825
NARS2	-1.8245
ALKBH2	-1.8242
NIFK	-1.8237
TSTD2	-1.8234
MOV10	-1.8223
NECTIN3	-1.8211
METTL16	-1.8209
COG2	-1.8196
PLAAT4	-1.8195
SNCA	-1.8194
BCKDHB	-1.8187
NAB2	-1.8184
ATG14	-1.8179
FAM241B	-1.8179
CD200R1	-1.8176
CREBL2	-1.8161
LRRCC1	-1.8152
NDUFAF2	-1.8151
TENT5C	-1.8139
TENT4A	-1.8127
158295	-1.8125
PPP1R26	-1.8123
TAFA1	-1.8116
RPL35	-1.8112
PCID2	-1.811
CLECL1	-1.8109
ZNF304	-1.8104
HMGXB3	-1.8093
FMO4	-1.8091
MRPL48	-1.8074
UTP4	-1.8073
TRIM47	-1.8067
AGAP5	-1.8062
399832	-1.8062
FGFRL1	-1.8056
TRIAP1	-1.8046
HIVEP3	-1.8045
KIAA0355	-1.8027
CASK	-1.8025
NAA80	-1.8017
RCC1L	-1.8017
KRT72	-1.8017
PALB2	-1.8014
ARMC1	-1.8013
CCDC85C	-1.8011
MALT1	-1.8003
MDS2	-1.8002
TAF3	-1.7994
ENTPD6	-1.7967
MPIG6B	-1.7957
SNX22	-1.7942
MRPL45	-1.794
SPRYD4	-1.7937
FN3KRP	-1.7937
PLEKHO1	-1.7935
TCTN1	-1.7935
KLK1	-1.7933
FAM20B	-1.7924
EARS2	-1.7919
IBTK	-1.7915
SUPV3L1	-1.7894
LZTFL1	-1.789
ZBTB38	-1.7888
DAAM1	-1.7878
UBA2	-1.7864
PRR22	-1.7842
STAP1	-1.7839
SFI1	-1.7837
SNORD72	-1.7829
SNX24	-1.7827
ACVR1	-1.782
ESF1	-1.7815
MTMR9LP	-1.7809
CTPS1	-1.7808
RPL5	-1.7803
SLC39A14	-1.78
157247	-1.7797
RPS5	-1.7789
C10orf88	-1.7757
THEM5	-1.7756
PPA1	-1.775
TCEAL6	-1.7749
LOC100240735	-1.7749
ZBTB25	-1.7728
ULK3	-1.7727
LRRC24	-1.7723
LOC155060	-1.7719
SSB	-1.7714
ZNF875	-1.7708
CNNM3-DT	-1.7707
BCL9L	-1.7696
UTP25	-1.7679
ZNF248	-1.7677
METAP2	-1.7675
HOXC4	-1.7673
ZNF530	-1.7659
TIGD2	-1.7651
TMEM209	-1.7648
KAT6B	-1.7647
PLA2G7	-1.7647
PWWP3A	-1.7634
S1PR2	-1.7628
CAMK2N1	-1.7613
GP1BB	-1.7609
C16orf58	-1.7597
SLC4A10	-1.7594
ZNF302	-1.7588
NBAS	-1.7581
GEMIN4	-1.7573
ZNF48	-1.7567
MAN2A1	-1.7555
ZNF485	-1.7552
PCED1B	-1.7552
TMEM177	-1.7512
SEC14L5	-1.7506
RPL18	-1.747
DTYMK	-1.747
SLC16A7	-1.7454
RHNO1	-1.7434
PDGFD	-1.7434
USP18	-1.7433
TAF9B	-1.741
RDH11	-1.74
CLYBL	-1.7393
GPRIN3	-1.7387
ZZZ3	-1.7384
DPY19L4	-1.7377
FBXO31	-1.7375
RTL5	-1.7374
TPM2	-1.7368
AGMAT	-1.7362
ZNF268	-1.7362
MSANTD2	-1.736
SLFN12L	-1.7346
MOCS2	-1.7344
POLR1B	-1.7336
AEN	-1.733
FAIM	-1.7301
MFAP3L	-1.7301
MYO9A	-1.7298
FAM160B2	-1.7292
CD27	-1.728
MYL9	-1.7272
MICAL3	-1.7266
JMY	-1.726
USP45	-1.7258
CDCA4	-1.7245
ZNF177	-1.7243
XKR6	-1.724
JHY	-1.7236
CD19	-1.7222
100289455	-1.7214
EIF2B3	-1.7213
NKX3-1	-1.7211
DIMT1	-1.72
TP53I13	-1.7193
DTX1	-1.7178
NOD1	-1.7173
TAS2R30	-1.716
SNORA58	-1.713
MXD4	-1.7127
LRRC14	-1.7117
ACSS1	-1.7117
MRPS30	-1.7081
GSS	-1.7079
286161	-1.7079
ZNF837	-1.7067
CA13	-1.7067
PTGS1	-1.7059
KIAA0895L	-1.7055
ZNF239	-1.7038
ZNF549	-1.7037
MTPAP	-1.702
DOCK7	-1.7017
RNF157	-1.701
RRN3P2	-1.7009
TMEM41A	-1.7003
IGSF22	-1.7002
CPOX	-1.7001
CSF1R	-1.6992
APOL6	-1.699
CD101	-1.6989
FOXK1	-1.6966
ZMYND19	-1.6962
HIC2	-1.6961
ZNF57	-1.6946
DEXI	-1.694
CRYGS	-1.6933
APOBEC3F	-1.6922
ADHFE1	-1.6915
C1orf216	-1.6915
NCEH1	-1.6911
PMVK	-1.6906
HLA-DOA	-1.6904
CD84	-1.6903
MAP4K1	-1.6902
DDX60	-1.6897
ALG8	-1.6874
CAND2	-1.6863
TCEAL5	-1.6859
AKR7A2	-1.6856
RSL1D1	-1.6848
PROCR	-1.6841
PRPF19	-1.6838
BOD1	-1.683
CYP20A1	-1.682
BOLA3	-1.682
QSER1	-1.6803
ZNF77	-1.6796
TTC19	-1.6789
CROCCP3	-1.6787
AMOT	-1.6754
GSDMB	-1.6754
ZFAND1	-1.6753
ZFP30	-1.6741
ULK2	-1.6735
INPP5E	-1.6722
SARS2	-1.6716
SLC25A39	-1.6716
DIRC3	-1.6713
PDE8A	-1.6712
MESD	-1.6688
S100A10	-1.6684
RPL36	-1.6678
ECSIT	-1.6668
CEP290	-1.6666
FBLN5	-1.6653
CCDC88C	-1.6652
PCGF5	-1.6633
SPIB	-1.663
CEP70	-1.6625
MAK16	-1.6613
DCUN1D4	-1.661
SFXN2	-1.661
LOC93622	-1.6602
ALDH6A1	-1.6596
FCRLA	-1.659
EEF1AKMT2	-1.6589
SHMT2	-1.6584
XPNPEP1	-1.658
C12orf65	-1.6576
TRIO	-1.6575
ABCD2	-1.656
PRNP	-1.6559
ENPP5	-1.6557
HTATSF1	-1.6552
RBFA	-1.6537
HMGN3	-1.6537
SNORD107	-1.653
C2orf92	-1.6528
AQP10	-1.6517
DOLPP1	-1.6516
BMPR2	-1.6496
TRIM68	-1.6484
SNRNP40	-1.6475
LMNTD2-AS1	-1.6472
LOC401312	-1.647
PCNT	-1.6464
ADCK5	-1.6459
ZNF195	-1.6431
PDCD7	-1.6431
SNHG8	-1.6423
SNHG6	-1.6414
FUT8-AS1	-1.6411
ACTR5	-1.6396
ZFP69	-1.6394
TUBGCP4	-1.6387
BICDL1	-1.6382
HSP90AB2P	-1.6372
ZNF567	-1.6371
TMEM161A	-1.6365
TNFSF9	-1.6348
UQCC2	-1.6337
NCL	-1.6327
ZMYM4	-1.6326
ZNF689	-1.6316
SMN1	-1.6309
PRKCH	-1.6301
ZNF777	-1.6298
SNORD18C	-1.6289
BRMS1L	-1.6286
MAN1C1	-1.6278
ZNF26	-1.6273
AKIP1	-1.6272
REX1BD	-1.6267
FBXO4	-1.6256
MPI	-1.6245
FNBP1L	-1.624
ILF3	-1.6238
NOL9	-1.6225
ZBTB40	-1.6225
LAP3	-1.6214
CCDC58	-1.6199
SS18L1	-1.6191
EBF1	-1.619
OXTR	-1.6187
CARNS1	-1.6165
TRMT13	-1.6161
GATA1	-1.6155
GRWD1	-1.6152
DANCR	-1.6149
FCMR	-1.6145
RFX7	-1.614
SEC1P	-1.6138
GATM	-1.6138
SIPA1L3	-1.6126
PDXDC1	-1.6123
NAPEPLD	-1.612
RRM1	-1.6104
CCDC91	-1.6101
EIF2AK3	-1.61
ZNF184	-1.6098
P4HTM	-1.6085
ZNF790-AS1	-1.6073
TSEN2	-1.6066
HEBP1	-1.6064
TCEAL4	-1.6059
RCN2	-1.6057
ZNF512	-1.6056
LIMD1	-1.605
CCDC66	-1.6043
RNASEH2B	-1.6042
TMEM176A	-1.6031
TMEM176B	-1.6031
MRM2	-1.6025
ZSWIM5	-1.6012
CA2	-1.6
PJVK	-1.5985
OAF	-1.5983
KNOP1	-1.5973
PPIE	-1.5965
LCMT2	-1.596
BNIP1	-1.5956
C1QBP	-1.5946
TMC8	-1.5933
100133130	-1.5929
C12orf42	-1.5928
ZNF415	-1.5921
BMS1P2	-1.5909
C1orf159	-1.5897
ZSCAN29	-1.5895
DNPH1	-1.589
DZIP3	-1.5884
SAPCD1	-1.5877
EI24	-1.5872
NEMP1	-1.5866
GOT2	-1.5864
QSOX2	-1.5856
MAP3K14	-1.5856
WBP11	-1.5834
RADIL	-1.5803
RPL23A	-1.5799
LYAR	-1.5784
CENPV	-1.5781
HLA-DMA	-1.5773
SIGLEC17P	-1.5772
MRPS7	-1.5771
EIF1AX	-1.5766
SPRED1	-1.5757
ORC5	-1.5755
TASP1	-1.5754
SDR42E1	-1.5742
ZBTB9	-1.5735
100133299	-1.5724
MDC1	-1.5718
BEX4	-1.5715
LINC02210	-1.571
C11orf1	-1.5709
OAS3	-1.5705
EP400	-1.5698
ZNF879	-1.5697
TYSND1	-1.5693
LSG1	-1.5682
DBP	-1.5678
AGRN	-1.5674
TRAK2	-1.567
DCAF16	-1.5657
BBS9	-1.5652
CARF	-1.5652
C15orf54	-1.5646
USP28	-1.5646
PRDX2	-1.5633
FIGNL1	-1.563
ADK	-1.5617
TMC6	-1.5615
FHIT	-1.5601
NAE1	-1.5601
PAN2	-1.5593
ALDH18A1	-1.5579
DDX19A	-1.5575
LOC644189	-1.5568
EFNB1	-1.5567
RTN4IP1	-1.5565
ZNRF3	-1.556
LAS1L	-1.5553
WDR46	-1.5552
DNAJC18	-1.5548
SLC2A11	-1.5541
CCT6B	-1.554
CAMSAP1	-1.5533
157562	-1.5531
ERCC1	-1.553
ELP4	-1.5516
286367	-1.551
CLEC10A	-1.551
ZNF92	-1.5508
RFESD	-1.5488
LINC00534	-1.5482
TUBB2A	-1.5474
SGCE	-1.5461
PIGL	-1.5451
UBA5	-1.543
LOC100499489	-1.5421
DCAF13P3	-1.5415
DPP7	-1.5404
LIG1	-1.5401
ATR	-1.5397
PPP1R17	-1.5395
CENPL	-1.5383
RNF207	-1.5382
MFHAS1	-1.5378
DNAI2	-1.5368
DSP	-1.5365
MCM3	-1.5365
TTYH2	-1.5364
ACSBG1	-1.535
CFAP36	-1.533
SMKR1	-1.5324
FEZ1	-1.5324
CD3E	-1.532
RTKN2	-1.5314
ACOT1	-1.5303
TMEM8B	-1.5291
HDDC2	-1.5283
GNA12	-1.5279
METTL2B	-1.5274
C12orf29	-1.5272
DROSHA	-1.5259
KDM2B	-1.5255
GLOD4	-1.525
SEPTIN8	-1.5249
TFB2M	-1.5233
CLUAP1	-1.5231
CSE1L	-1.5231
COL6A2	-1.5227
GNL3	-1.5205
OSBPL10	-1.5205
TCEAL8	-1.5199
DDX54	-1.5196
GTPBP3	-1.5195
LINC02878	-1.5183
TIMM21	-1.5169
TYW1	-1.5162
SAMD12	-1.5158
CXCR3	-1.5157
ABCB10	-1.5147
ALKBH3	-1.5133
NSMF	-1.513
NHP2	-1.513
PCYOX1L	-1.5129
SEH1L	-1.5127
ABCE1	-1.5102
NUP93	-1.51
SLC25A22	-1.5097
R3HDM1	-1.5087
ANKRD9	-1.508
KLHL17	-1.5077
ALMS1P1	-1.5073
HNRNPA0	-1.506
FAM122B	-1.5043
MTERF4	-1.5038
OGFOD3	-1.5037
PLAAT3	-1.5036
ACVR2B	-1.5036
ZNF823	-1.5032
SPIN1	-1.5027
ANXA6	-1.5024
HSH2D	-1.5009
BBS2	-1.5008
MRPL24	-1.4999
3808	-1.4978
METAP1	-1.4976
PLEKHA7	-1.4966
WNT7A	-1.4962
CDR2	-1.4954
HDGFL3	-1.4952
DDX55	-1.495
CWF19L2	-1.4942
GRHL1	-1.4937
EMP1	-1.4935
LGALS12	-1.4931
TMEM200A	-1.493
ZSCAN9	-1.4929
TIMM9	-1.4926
ARL1	-1.4915
PDZK1IP1	-1.4891
CCT3	-1.4888
VAMP8	-1.4877
FAM221A	-1.4865
AEBP1	-1.485
HLCS	-1.4848
EEF1B2	-1.4835
FGFBP3	-1.4832
M6PR	-1.4823
BZW2	-1.4819
STX17-AS1	-1.4815
DDX47	-1.4812
ASF1A	-1.4801
QPCTL	-1.4796
ATAD3B	-1.4791
RHOBTB2	-1.4791
GPR162	-1.479
TRMT2A	-1.4785
TMA16	-1.4778
FKBP1B	-1.476
SPRYD7	-1.4748
RPP40	-1.4738
STYX	-1.4735
283588	-1.4731
DCAF1	-1.4728
DNAJA4	-1.472
ITGB8	-1.472
DHRS4	-1.4705
CFAP298	-1.4703
LTBP3	-1.468
GLI1	-1.4661
FBXW8	-1.4653
MYB	-1.4652
PTCD1	-1.4649
APEX1	-1.4647
DSEL	-1.4639
GAS5	-1.4636
CILK1	-1.4622
PMS1	-1.4609
NOL11	-1.4587
KAT2A	-1.4586
TMEM116	-1.4568
RYR1	-1.4567
MPHOSPH10	-1.4559
RNASEH2B-AS1	-1.4535
TIMM10B	-1.4533
ZNF10	-1.4527
C11orf80	-1.452
SPNS3	-1.4503
TM7SF2	-1.449
MEF2C	-1.449
90834	-1.4487
MRPL14	-1.4484
PPP1R16A	-1.4478
ISM1	-1.4478
REREP3	-1.4473
RANGRF	-1.4473
TAS2R14	-1.4457
MGMT	-1.4452
ZNF286A	-1.445
FAM162A	-1.4438
HNRNPA1L2	-1.4427
SH2D2A	-1.4422
TSPYL5	-1.4418
PTK2	-1.4414
TCEAL1	-1.4414
TSEN15	-1.4405
BTN2A2	-1.4399
H2BW2	-1.439
P2RY2	-1.439
CASP6	-1.4373
CYSLTR2	-1.4372
SLC30A4	-1.4372
BUB3	-1.4354
LIPH	-1.4351
NUDT6	-1.435
57235	-1.4346
EGF	-1.4343
FXN	-1.4327
RLN1	-1.4317
C19orf33	-1.4314
RMDN3	-1.431
CROCCP2	-1.4306
ASTE1	-1.4305
FNDC10	-1.4299
NUP43	-1.429
THAP9	-1.4289
ST6GALNAC1	-1.4275
ZNF181	-1.4254
TMEM94	-1.4253
TMEM42	-1.4234
CCT6A	-1.4232
MTERF3	-1.4231
ELAVL1	-1.4225
CPSF1	-1.4218
KBTBD8	-1.4207
400666	-1.4206
BMS1P1	-1.4184
MGA	-1.4181
CD22	-1.4175
LIN52	-1.4171
RAB6B	-1.4167
VPS45	-1.4146
P2RX7	-1.4136
CPA3	-1.4132
ZNF575	-1.4128
LHPP	-1.4128
RHPN1	-1.4122
ANGEL1	-1.4122
TOE1	-1.412
ARL2BP	-1.4114
PAXX	-1.4111
PCGF6	-1.4103
ALKAL2	-1.4094
TSPOAP1	-1.4092
GAREM2	-1.4092
LOC100291105	-1.4091
MIGA1	-1.4087
SLC35G3	-1.4082
PPP2R1B	-1.4079
BSPRY	-1.4068
GSTM3	-1.4066
LSM4	-1.4058
SIRT4	-1.4048
KIF22	-1.4042
CD1C	-1.4038
UBAP1L	-1.4037
100131662	-1.4033
TRGV7	-1.4031
SMC1A	-1.4027
ARSK	-1.402
TASOR2	-1.4016
UPF3A	-1.4013
HNRNPR	-1.4012
MIR155HG	-1.4002
SRSF6	-1.3987
ZNF781	-1.3985
IMP3	-1.3981
PAXIP1-AS1	-1.3971
TEX10	-1.3968
PRXL2A	-1.3964
UBE2N	-1.3952
GPATCH11	-1.3946
MRPL35	-1.3945
ABCF2	-1.3944
HYI	-1.3927
PPP5C	-1.3924
USP37	-1.3923
TMSB15B	-1.3911
ZNF260	-1.3902
SLC27A5	-1.3901
DIP2A	-1.3895
SF3B3	-1.3894
IRGM	-1.3885
EXOG	-1.3885
RRP9	-1.3832
SNHG15	-1.3823
PKIA	-1.3806
CDK20	-1.379
SNTG2	-1.3782
JMJD4	-1.3779
FAM76A	-1.3775
ODF2	-1.3762
CRTAP	-1.3759
DNAJC19	-1.3759
TDRD3	-1.3757
MMP23B	-1.3747
ZNF512B	-1.3743
CDC23	-1.373
BTLA	-1.3723
PFKP	-1.3723
IL4I1	-1.3721
MTX3	-1.372
EGR2	-1.3694
NVL	-1.3683
MEST	-1.3659
EHBP1	-1.3643
MAP2K5	-1.3641
TSTD3	-1.3635
HSPA9	-1.3631
ZSCAN18	-1.3626
KDF1	-1.3625
DDB1	-1.3605
ZNF600	-1.3602
TRMT10B	-1.3601
BCAT2	-1.3597
RWDD2A	-1.3593
728147	-1.3588
SMN2	-1.3582
EFL1	-1.3582
GAS2L1	-1.358
POLR2H	-1.3567
ZNF432	-1.3559
SHPRH	-1.3556
CAD	-1.355
HDAC9	-1.3548
MICU3	-1.3548
EEF1G	-1.3542
GTPBP4	-1.3542
ELAC1	-1.3537
RNF8	-1.3523
ZBED4	-1.3516
FDX1	-1.3506
IER3IP1	-1.3505
LARS2	-1.3503
TSPAN18	-1.3494
GORAB	-1.349
COPZ2	-1.3489
EIF3C	-1.3484
MCUR1	-1.3477
PREP	-1.3472
VIL1	-1.3466
USP5	-1.3463
NOP56	-1.3463
TRIM14	-1.3449
TANGO6	-1.3438
ELOA	-1.343
ACO1	-1.3415
TSPAN33	-1.3408
COQ6	-1.3398
DBT	-1.3396
OLA1	-1.3395
ABCB7	-1.3387
RPUSD2	-1.338
SC5D	-1.3374
LAMP5	-1.3372
ACADSB	-1.3371
PFDN4	-1.3366
CDC14B	-1.336
ZNF502	-1.3351
SHLD2	-1.335
ARRB1	-1.3345
ZMIZ2	-1.3338
GMPS	-1.3307
IQCB1	-1.3296
MDN1	-1.3296
SETD6	-1.3285
TGFB3	-1.3282
DLAT	-1.3271
NT5E	-1.3248
ADAL	-1.3245
YARS1	-1.3224
CDK5RAP1	-1.3223
SLC25A42	-1.3222
MCM8	-1.322
CCT4	-1.3202
TMEM135	-1.3201
ZNF786	-1.3199
LRRC20	-1.3194
MSANTD3	-1.3188
AKR7L	-1.3186
RPS19	-1.3184
RNF214	-1.3178
CNR2	-1.3177
54094	-1.3171
ATMIN	-1.3163
MBIP	-1.3149
SNORD38B	-1.3148
SRSF7	-1.3146
ZNF259P1	-1.3141
EPB41L4A	-1.3141
VEGFC	-1.3137
UBFD1	-1.3135
TSPOAP1-AS1	-1.3127
ZSCAN5A	-1.3119
SP140	-1.3119
SPATA5	-1.3105
PRKAG2-AS1	-1.3101
GUCY1A1	-1.3099
CMTR2	-1.3097
TMEM106C	-1.3093
TRIM44	-1.3077
NDUFA5	-1.3077
TAF1A	-1.3076
POLR3H	-1.3057
TSHZ1	-1.3055
RASSF7	-1.3053
MTURN	-1.305
FUNDC2	-1.3048
ILF3-DT	-1.3034
USP36	-1.3034
SWAP70	-1.3029
RNASEH2C	-1.3026
CDRT4	-1.3023
LINC00515	-1.3003
PIDD1	-1.3002
NAXE	-1.2992
EEF2	-1.2958
ANKRD36B	-1.2936
IVD	-1.2924
MSANTD4	-1.2916
UXS1	-1.2911
PLCXD1	-1.2898
EPN2	-1.2871
GALNT11	-1.287
ZNF234	-1.2859
C2CD4D-AS1	-1.2852
BCCIP	-1.2849
CDNF	-1.2848
ZNF211	-1.2847
SPATA24	-1.2842
RABEP2	-1.2831
MRNIP	-1.2812
INTS14	-1.281
FNBP4	-1.2808
ADAM1A	-1.2798
SMIM5	-1.2782
SMYD3	-1.277
OVGP1	-1.2762
RTN4R	-1.2758
NPM1	-1.2757
ZNF500	-1.2716
MYCL	-1.2702
ZNF662	-1.2701
GDF11	-1.27
POLA1	-1.2697
COL4A3	-1.269
LOC100505585	-1.2689
TTC21A	-1.2679
TMEM243	-1.2638
AMER1	-1.2637
UTP6	-1.2622
EIF3L	-1.262
ZNF383	-1.2617
HCFC2	-1.2596
CENPJ	-1.2596
SET	-1.2595
IQCH-AS1	-1.2589
PTGDR	-1.2586
KRI1	-1.2581
NUCKS1	-1.2577
CA11	-1.2568
SALL2	-1.2562
EIF3B	-1.2561
SLC16A1-AS1	-1.255
HAUS3	-1.2543
SARM1	-1.2532
ELP2	-1.2518
MYH3	-1.2508
SLC37A1	-1.2496
IRS1	-1.2488
MRPS26	-1.2474
ERCC8	-1.2468
SLC35D2	-1.2454
ZBTB5	-1.2452
NMNAT3	-1.2452
ACOT4	-1.2427
PHOSPHO2	-1.2414
EEF1A2	-1.2409
RNF114	-1.2404
LIPT1	-1.2392
RIOX1	-1.2352
CCNB1IP1	-1.2349
RBM34	-1.2339
EIF2A	-1.2307
CYP4F22	-1.2301
CELSR2	-1.2298
UFSP2	-1.2287
HAUS5	-1.2276
DENND4C	-1.2274
ATAD3A	-1.2245
TMEM138	-1.2244
NUDCD2	-1.2237
ZNF320	-1.2216
SLA2	-1.221
PARP1	-1.22
SBDSP1	-1.2196
TMEM38B	-1.2191
STAT2	-1.2178
DHX35	-1.2169
RBMX	-1.2163
GPALPP1	-1.2148
TMEM18	-1.2138
MAN1B1-DT	-1.2126
NOXA1	-1.2125
DNAJC9	-1.211
100128242	-1.2108
PAGE2	-1.2082
URGCP	-1.2075
RAP1GDS1	-1.2062
MRPL50	-1.2059
TTC21B	-1.2039
MAGI3	-1.2024
100127972	-1.2021
CYCS	-1.2016
CRYL1	-1.2005
RFPL2	-1.1992
THOP1	-1.1983
C2orf15	-1.1961
MCCC2	-1.1955
SNRPA1	-1.1945
100127994	-1.1939
URB1	-1.1938
C3orf33	-1.1932
CMTR1	-1.1926
RAD50	-1.1924
FAM86C1	-1.1907
PPARA	-1.1903
FER	-1.1902
HACL1	-1.1901
CNOT9	-1.1881
MLF1	-1.1852
PRR3	-1.1841
FUNDC2P2	-1.1836
HEATR1	-1.1832
ARFGEF2	-1.183
ZBED3	-1.1826
UNC119B	-1.1821
AVEN	-1.1819
LINC01550	-1.1794
AIFM3	-1.1793
GPN1	-1.1789
LRRC1	-1.1777
FZD3	-1.1775
GFI1	-1.1757
OTUD7B	-1.1748
ECHS1	-1.1743
STRBP	-1.174
ZNF382	-1.1724
NOP14	-1.1712
PYGB	-1.171
TPRN	-1.17
KATNAL1	-1.1693
100130093	-1.1687
CLEC2D	-1.1684
TRAPPC6A	-1.168
KCNG1	-1.1675
NSA2	-1.1668
SLC35D3	-1.1666
RPS6KA4	-1.1662
NELFCD	-1.1631
NBEAL1	-1.1613
C16orf74	-1.1608
[truncated: 1,178 more rows]
