# Supplementary material for: Inflammatory signature in acute-on-chronic liver failure includes increased expression of granulocyte genes ELANE, MPO and CD177
Source: Sci Rep. 2021 Sep 22;11:18849. doi: 10.1038/s41598-021-98086-6 (PMC8458283; doi:10.1038/s41598-021-98086-6)
Supplement: Supplementary file 12 — Supplementary Information 12. [file 41598_2021_98086_MOESM12_ESM.xlsx]

## Sheet: Sheet1
	CD177 (No. of cells/ 3.14µm2)		CD16 (No. of cells/ 3.14µm2)
	ACLF	CLD	ACLF	CLD
	28.6	26.2	49.6	33.8
	20.7	15.25	18	35.25
	22	6.4	26.5	63.6
	18.8	31	30	44
	28.2	24	58	51.5
	14.4	11.8	71.4	92.6
	21.3	11.4	42.25	42.4
	45.5	7.25	41.5	41
		30.8		56
